# Supplementary material for: Construction and verification of a prognostic model for bladder cancer based on disulfidptosis-related angiogenesis genes
Source: PeerJ. 2025 Feb 21;13:e18911. doi: 10.7717/peerj.18911 (PMC11849515; doi:10.7717/peerj.18911)
Supplement: Supplemental Information 5 [file peerj-13-18911-s005.xls]

## Sheet: Sample setup
Instrument Name	2765220071247
Instrument Mode	QuantStudio™ 5 System
Serial Number	2765220071247
Signal Smoothing	true
Creation Date	2024-08-04 17:58:45 afternoon CST
Heating Module Type	96-Well 0.2-mL Block
Reference Fluorescence
Analysis at a specific stage/cycle	stage2, step2
Experiment Name	2024-08-04_T24
Experiment File Name	D:\ZZH\2024-08-04_T24.eds
Experiment Barcode
Experiment Annotation
Experiment Type	Quantitative-Comparison
Experiment End Time	2024-08-04 17:42:18 afternoon CST
Calibration Background Expired	No
Calibration Background Perform	09-28-2022
Calibration Pure Dye ABY Expired	No
Calibration Pure Dye ABY Perform	09-28-2022
Calibration Pure Dye CY5 Expired	No
Calibration Pure Dye CY5 Perform	09-28-2022
Calibration Pure Dye FAM Expired	No
Calibration Pure Dye FAM Perform	09-28-2022
Calibration Pure Dye JUN Expired	No
Calibration Pure Dye JUN Perform	09-28-2022
Calibration Pure Dye MUSTANG PURPLE Expired	No
Calibration Pure Dye MUSTANG PURPLE Perform	09-28-2022
Calibration Pure Dye NED Expired	No
Calibration Pure Dye NED Perform	09-28-2022
Calibration Pure Dye ROX Expired	No
Calibration Pure Dye ROX Perform	09-28-2022
Calibration Pure Dye SYBR Expired	No
Calibration Pure Dye SYBR Perform	09-28-2022
Calibration Pure Dye TAMRA Expired	No
Calibration Pure Dye TAMRA 执行	09-28-2022
Calibration Pure Dye VIC Expired	No
Calibration Pure Dye VIC Perform	09-28-2022
Calibration ROI Expired	No
Calibration ROI Perform	09-28-2022
Calibration Uniformity Expired	No
Calibration Uniformity Perform	09-28-2022
Melt Curve Stage	Stage3
Username
Reagent	SYBR_GREEN
Post-read Stage/Step
Quantification Cycle Method	Ct
Pre-read Stage/Step Number
Reaction Wel	Reaction Well Position	Sample Name	Sample Color	Biological Replicate Group Name	Biological Replicate Group Color	Gene Name	Gene Color	Task	Reporter Group	Quencher Group	number	Annotation
	A1	SV-1	RGB(176,23,31)			SCG2	RGB(176,23,31)	UNKNOWN	SYBR	None
2	A2	SV-2	RGB(0,0,255)			SCG2	RGB(176,23,31)	UNKNOWN	SYBR	None
3	A3	SV-3	RGB(0,139,69)			SCG2	RGB(176,23,31)	UNKNOWN	SYBR	None
4	A4	T24-1	RGB(255,127,0)			SCG2	RGB(176,23,31)	UNKNOWN	SYBR	None
5	A5	T24-2	RGB(139,137,112)			SCG2	RGB(176,23,31)	UNKNOWN	SYBR	None
6	A6	T24-3	RGB(238,121,66)			SCG2	RGB(176,23,31)	UNKNOWN	SYBR	None
7	A7	SW1710-1	RGB(142,56,142)			SCG2	RGB(176,23,31)	UNKNOWN	SYBR	None
8	A8	SW1710-2	RGB(198,113,113)			SCG2	RGB(176,23,31)	UNKNOWN	SYBR	None
9	A9	SW1710-3	RGB(0,245,255)			SCG2	RGB(176,23,31)	UNKNOWN	SYBR	None
10	A10	T24-1	RGB(255,127,0)			ACTIN	RGB(0,139,69)	UNKNOWN	SYBR	None
11	A11	T24-2	RGB(139,137,112)			ACTIN	RGB(0,139,69)	UNKNOWN	SYBR	None
12	A12	T24-3	RGB(238,121,66)			ACTIN	RGB(0,139,69)	UNKNOWN	SYBR	None
13	B1	SV-1	RGB(176,23,31)			SCG2	RGB(176,23,31)	UNKNOWN	SYBR	None
14	B2	SV-2	RGB(0,0,255)			SCG2	RGB(176,23,31)	UNKNOWN	SYBR	None
15	B3	SV-3	RGB(0,139,69)			SCG2	RGB(176,23,31)	UNKNOWN	SYBR	None
16	B4	T24-1	RGB(255,127,0)			SCG2	RGB(176,23,31)	UNKNOWN	SYBR	None
17	B5	T24-2	RGB(139,137,112)			SCG2	RGB(176,23,31)	UNKNOWN	SYBR	None
18	B6	T24-3	RGB(238,121,66)			SCG2	RGB(176,23,31)	UNKNOWN	SYBR	None
19	B7	SW1710-1	RGB(142,56,142)			SCG2	RGB(176,23,31)	UNKNOWN	SYBR	None
20	B8	SW1710-2	RGB(198,113,113)			SCG2	RGB(176,23,31)	UNKNOWN	SYBR	None
21	B9	SW1710-3	RGB(0,245,255)			SCG2	RGB(176,23,31)	UNKNOWN	SYBR	None
22	B10	SV-1	RGB(176,23,31)			ACTIN	RGB(0,139,69)	UNKNOWN	SYBR	None
23	B11	SV-2	RGB(0,0,255)			ACTIN	RGB(0,139,69)	UNKNOWN	SYBR	None
24	B12	SV-3	RGB(0,139,69)			ACTIN	RGB(0,139,69)	UNKNOWN	SYBR	None
25	C1	SV-1	RGB(176,23,31)			SCG2	RGB(176,23,31)	UNKNOWN	SYBR	None
26	C2	SV-2	RGB(0,0,255)			SCG2	RGB(176,23,31)	UNKNOWN	SYBR	None
27	C3	SV-3	RGB(0,139,69)			SCG2	RGB(176,23,31)	UNKNOWN	SYBR	None
28	C4	T24-1	RGB(255,127,0)			SCG2	RGB(176,23,31)	UNKNOWN	SYBR	None
29	C5	T24-2	RGB(139,137,112)			SCG2	RGB(176,23,31)	UNKNOWN	SYBR	None
30	C6	T24-3	RGB(238,121,66)			SCG2	RGB(176,23,31)	UNKNOWN	SYBR	None
31	C7	SW1710-1	RGB(142,56,142)			SCG2	RGB(176,23,31)	UNKNOWN	SYBR	None
32	C8	SW1710-2	RGB(198,113,113)			SCG2	RGB(176,23,31)	UNKNOWN	SYBR	None
33	C9	SW1710-3	RGB(0,245,255)			SCG2	RGB(176,23,31)	UNKNOWN	SYBR	None
34	C10	SW1710-1	RGB(142,56,142)			ACTIN	RGB(0,139,69)	UNKNOWN	SYBR	None
35	C11	SW1710-2	RGB(198,113,113)			ACTIN	RGB(0,139,69)	UNKNOWN	SYBR	None
36	C12	SW1710-3	RGB(0,245,255)			ACTIN	RGB(0,139,69)	UNKNOWN	SYBR	None
37	D1	SV-1	RGB(176,23,31)			COL5A2	RGB(0,0,255)	UNKNOWN	SYBR	None
38	D2	SV-2	RGB(0,0,255)			COL5A2	RGB(0,0,255)	UNKNOWN	SYBR	None
39	D3	SV-3	RGB(0,139,69)			COL5A2	RGB(0,0,255)	UNKNOWN	SYBR	None
40	D4	T24-1	RGB(255,127,0)			COL5A2	RGB(0,0,255)	UNKNOWN	SYBR	None
41	D5	T24-2	RGB(139,137,112)			COL5A2	RGB(0,0,255)	UNKNOWN	SYBR	None
42	D6	T24-3	RGB(238,121,66)			COL5A2	RGB(0,0,255)	UNKNOWN	SYBR	None
43	D7	SW1710-1	RGB(142,56,142)			COL5A2	RGB(0,0,255)	UNKNOWN	SYBR	None
44	D8	SW1710-2	RGB(198,113,113)			COL5A2	RGB(0,0,255)	UNKNOWN	SYBR	None
45	D9	SW1710-3	RGB(0,245,255)			COL5A2	RGB(0,0,255)	UNKNOWN	SYBR	None
46	D10
47	D11
48	D12
49	E1	SV-1	RGB(176,23,31)			COL5A2	RGB(0,0,255)	UNKNOWN	SYBR	None
50	E2	SV-2	RGB(0,0,255)			COL5A2	RGB(0,0,255)	UNKNOWN	SYBR	None
51	E3	SV-3	RGB(0,139,69)			COL5A2	RGB(0,0,255)	UNKNOWN	SYBR	None
52	E4	T24-1	RGB(255,127,0)			COL5A2	RGB(0,0,255)	UNKNOWN	SYBR	None
53	E5	T24-2	RGB(139,137,112)			COL5A2	RGB(0,0,255)	UNKNOWN	SYBR	None
54	E6	T24-3	RGB(238,121,66)			COL5A2	RGB(0,0,255)	UNKNOWN	SYBR	None
55	E7	SW1710-1	RGB(142,56,142)			COL5A2	RGB(0,0,255)	UNKNOWN	SYBR	None
56	E8	SW1710-2	RGB(198,113,113)			COL5A2	RGB(0,0,255)	UNKNOWN	SYBR	None
57	E9	SW1710-3	RGB(0,245,255)			COL5A2	RGB(0,0,255)	UNKNOWN	SYBR	None
58	E10
59	E11
60	E12
61	F1	SV-1	RGB(176,23,31)			COL5A2	RGB(0,0,255)	UNKNOWN	SYBR	None
62	F2	SV-2	RGB(0,0,255)			COL5A2	RGB(0,0,255)	UNKNOWN	SYBR	None
63	F3	SV-3	RGB(0,139,69)			COL5A2	RGB(0,0,255)	UNKNOWN	SYBR	None
64	F4	T24-1	RGB(255,127,0)			COL5A2	RGB(0,0,255)	UNKNOWN	SYBR	None
65	F5	T24-2	RGB(139,137,112)			COL5A2	RGB(0,0,255)	UNKNOWN	SYBR	None
66	F6	T24-3	RGB(238,121,66)			COL5A2	RGB(0,0,255)	UNKNOWN	SYBR	None
67	F7	SW1710-1	RGB(142,56,142)			COL5A2	RGB(0,0,255)	UNKNOWN	SYBR	None
68	F8	SW1710-2	RGB(198,113,113)			COL5A2	RGB(0,0,255)	UNKNOWN	SYBR	None
69	F9	SW1710-3	RGB(0,245,255)			COL5A2	RGB(0,0,255)	UNKNOWN	SYBR	None
70	F10
71	F11
72	F12
73	G1	SV-1	RGB(176,23,31)			ACTIN	RGB(0,139,69)	UNKNOWN	SYBR	None
74	G2	SV-2	RGB(0,0,255)			ACTIN	RGB(0,139,69)	UNKNOWN	SYBR	None
75	G3	SV-3	RGB(0,139,69)			ACTIN	RGB(0,139,69)	UNKNOWN	SYBR	None
76	G4	T24-1	RGB(255,127,0)			ACTIN	RGB(0,139,69)	UNKNOWN	SYBR	None
77	G5	T24-2	RGB(139,137,112)			ACTIN	RGB(0,139,69)	UNKNOWN	SYBR	None
78	G6	T24-3	RGB(238,121,66)			ACTIN	RGB(0,139,69)	UNKNOWN	SYBR	None
79	G7	SW1710-1	RGB(142,56,142)			ACTIN	RGB(0,139,69)	UNKNOWN	SYBR	None
80	G8	SW1710-2	RGB(198,113,113)			ACTIN	RGB(0,139,69)	UNKNOWN	SYBR	None
81	G9	SW1710-3	RGB(0,245,255)			ACTIN	RGB(0,139,69)	UNKNOWN	SYBR	None
82	G10
83	G11
84	G12
85	H1	SV-1	RGB(176,23,31)			ACTIN	RGB(0,139,69)	UNKNOWN	SYBR	None
86	H2	SV-2	RGB(0,0,255)			ACTIN	RGB(0,139,69)	UNKNOWN	SYBR	None
87	H3	SV-3	RGB(0,139,69)			ACTIN	RGB(0,139,69)	UNKNOWN	SYBR	None
88	H4	T24-1	RGB(255,127,0)			ACTIN	RGB(0,139,69)	UNKNOWN	SYBR	None
89	H5	T24-2	RGB(139,137,112)			ACTIN	RGB(0,139,69)	UNKNOWN	SYBR	None
90	H6	T24-3	RGB(238,121,66)			ACTIN	RGB(0,139,69)	UNKNOWN	SYBR	None
91	H7	SW1710-1	RGB(142,56,142)			ACTIN	RGB(0,139,69)	UNKNOWN	SYBR	None
92	H8	SW1710-2	RGB(198,113,113)			ACTIN	RGB(0,139,69)	UNKNOWN	SYBR	None
93	H9	SW1710-3	RGB(0,245,255)			ACTIN	RGB(0,139,69)	UNKNOWN	SYBR	None
94	H10
95	H11
96	H12

## Sheet: Amplification data
Instrument Name	2765220071247
Instrument Mode	QuantStudio™ 5 System
Serial Number	2765220071247
Signal Smoothing	true
Creation Date	2024-08-04 17:58:45 afternoon CST
Heating Module Type	96-Well 0.2-mL Block
Reference Fluorescence
Analysis at a specific stage/cycle	stage2, step2
Experiment Name	2024-08-04_T24
Experiment File Name	D:\ZZH\2024-08-04_T24.eds
Experiment Barcode
Experiment Annotation
Experiment Type	Quantitative-Comparison
Experiment End Time	2024-08-04 17:42:18 afternoon CST
Calibration Background Expired	No
Calibration Background Perform	09-28-2022
Calibration Pure Dye ABY Expired	No
Calibration Pure Dye ABY Perform	09-28-2022
Calibration Pure Dye CY5 Expired	No
Calibration Pure Dye CY5 Perform	09-28-2022
Calibration Pure Dye FAM Expired	No
Calibration Pure Dye FAM Perform	09-28-2022
Calibration Pure Dye JUN Expired	No
Calibration Pure Dye JUN Perform	09-28-2022
Calibration Pure Dye MUSTANG PURPLE Expired	No
Calibration Pure Dye MUSTANG PURPLE Perform	09-28-2022
Calibration Pure Dye NED Expired	No
Calibration Pure Dye NED Perform	09-28-2022
Calibration Pure Dye ROX Expired	No
Calibration Pure Dye ROX Perform	09-28-2022
Calibration Pure Dye SYBR Expired	No
Calibration Pure Dye SYBR Perform	09-28-2022
Calibration Pure Dye TAMRA Expired	No
Calibration Pure Dye TAMRA 执行	09-28-2022
Calibration Pure Dye VIC Expired	No
Calibration Pure Dye VIC Perform	09-28-2022
Calibration ROI Expired	No
Calibration ROI Perform	09-28-2022
Calibration Uniformity Expired	No
Calibration Uniformity Perform	09-28-2022
Melt Curve Stage	Stage3
Username
Reagent	SYBR_GREEN
Post-read Stage/Step
Quantification Cycle Method	Ct
Pre-read Stage/Step Number
Reaction Well	Reaction Well Position	Cycle Number	Gene Name	Rn	ΔRn
1	A1	1	SCG2	46995.7	-291.988
1	A1	2	SCG2	46835.9	-271.433
1	A1	3	SCG2	46638.9	-288.011
1	A1	4	SCG2	46713.3	-33.3073
1	A1	5	SCG2	46837.7	271.47
1	A1	6	SCG2	46630.2	244.361
1	A1	7	SCG2	46387	181.451
1	A1	8	SCG2	46069.4	44.2794
1	A1	9	SCG2	45697.2	-147.56
1	A1	10	SCG2	45446.4	-218.052
1	A1	11	SCG2	45127.2	-356.837
1	A1	12	SCG2	45094.6	-209.103
1	A1	13	SCG2	45467.1	343.741
1	A1	14	SCG2	45086.6	143.542
1	A1	15	SCG2	44831.5	68.8004
1	A1	16	SCG2	44657.4	75.1366
1	A1	17	SCG2	44371.6	-30.3476
1	A1	18	SCG2	44204.7	-16.9333
1	A1	19	SCG2	43988	-53.273
1	A1	20	SCG2	43841.5	-19.3587
1	A1	21	SCG2	43749	68.4384
1	A1	22	SCG2	43755.7	255.532
1	A1	23	SCG2	43856.9	537.111
1	A1	24	SCG2	43892.4	752.916
1	A1	25	SCG2	44082.9	1123.79
1	A1	26	SCG2	44404	1625.29
1	A1	27	SCG2	45019.3	2420.93
1	A1	28	SCG2	46237.7	3819.63
1	A1	29	SCG2	49180	6942.35
1	A1	30	SCG2	54808.7	12751.4
1	A1	31	SCG2	65087.1	23210.1
1	A1	32	SCG2	82129.6	40433
1	A1	33	SCG2	109453	67936.9
1	A1	34	SCG2	146683	105347
1	A1	35	SCG2	188600	147445
1	A1	36	SCG2	227504	186529
1	A1	37	SCG2	260101	219306
1	A1	38	SCG2	284834	244219
1	A1	39	SCG2	303130	262696
1	A1	40	SCG2	315746	275492
2	A2	1	SCG2	44195	-528.168
2	A2	2	SCG2	44158.5	-481.207
2	A2	3	SCG2	44324.5	-231.743
2	A2	4	SCG2	44807.6	334.737
2	A2	5	SCG2	44903.5	514.138
2	A2	6	SCG2	44695.8	389.853
2	A2	7	SCG2	44055.3	-167.152
2	A2	8	SCG2	43856.5	-282.516
2	A2	9	SCG2	43914	-141.571
2	A2	10	SCG2	43802.3	-169.88
2	A2	11	SCG2	43522.1	-366.678
2	A2	12	SCG2	43573	-232.249
2	A2	13	SCG2	44039.6	317.723
2	A2	14	SCG2	43521.7	-116.762
2	A2	15	SCG2	43318.1	-236.895
2	A2	16	SCG2	43299.2	-172.298
2	A2	17	SCG2	43262	-126.096
2	A2	18	SCG2	43284.8	-19.815
2	A2	19	SCG2	43501.3	280.095
2	A2	20	SCG2	43444.1	306.285
2	A2	21	SCG2	43175.2	120.824
2	A2	22	SCG2	43130.7	159.796
2	A2	23	SCG2	43209.9	322.448
2	A2	24	SCG2	43277.5	473.521
2	A2	25	SCG2	43671.1	950.552
2	A2	26	SCG2	44230.3	1593.19
2	A2	27	SCG2	44826.4	2272.68
2	A2	28	SCG2	46518.8	4048.55
2	A2	29	SCG2	49553.1	7166.26
2	A2	30	SCG2	55941.2	13637.8
2	A2	31	SCG2	67922.4	25702.4
2	A2	32	SCG2	87133.7	44997.3
2	A2	33	SCG2	117670	75617.1
2	A2	34	SCG2	157930	115961
2	A2	35	SCG2	201467	159581
2	A2	36	SCG2	241127	199324
2	A2	37	SCG2	273402	231683
2	A2	38	SCG2	298303	256667
2	A2	39	SCG2	317112	275560
2	A2	40	SCG2	330219	288750
3	A3	1	SCG2	42863.4	20.1685
3	A3	2	SCG2	42799.4	39.7079
3	A3	3	SCG2	42635.7	-40.5027
3	A3	4	SCG2	42390.1	-202.604
3	A3	5	SCG2	42384.9	-124.334
3	A3	6	SCG2	42764	338.252
3	A3	7	SCG2	42305.8	-36.4507
3	A3	8	SCG2	42101.9	-156.841
3	A3	9	SCG2	42165	-10.3328
3	A3	10	SCG2	42173.9	82.1167
3	A3	11	SCG2	42131.1	122.82
3	A3	12	SCG2	42242.2	317.34
3	A3	13	SCG2	42084.6	243.243
3	A3	14	SCG2	41612.9	-144.933
3	A3	15	SCG2	41452.4	-221.897
3	A3	16	SCG2	41423.4	-167.479
3	A3	17	SCG2	41429.1	-78.2795
3	A3	18	SCG2	41506.2	82.3068
3	A3	19	SCG2	41420.9	80.561
3	A3	20	SCG2	41173.9	-82.9855
3	A3	21	SCG2	41191.4	17.9757
3	A3	22	SCG2	41492.9	403.05
3	A3	23	SCG2	41525.6	519.199
3	A3	24	SCG2	41531.1	608.234
3	A3	25	SCG2	41688.7	849.289
3	A3	26	SCG2	42701.2	1945.27
3	A3	27	SCG2	44102.8	3430.36
3	A3	28	SCG2	46358	5769.04
3	A3	29	SCG2	50776.4	10270.9
3	A3	30	SCG2	59542.3	19120.3
3	A3	31	SCG2	75156	34817.6
3	A3	32	SCG2	100040	59785.4
3	A3	33	SCG2	136034	95862.5
3	A3	34	SCG2	178463	138375
3	A3	35	SCG2	218796	178792
3	A3	36	SCG2	255552	215631
3	A3	37	SCG2	287413	247575
3	A3	38	SCG2	311791	272037
3	A3	39	SCG2	327829	288159
3	A3	40	SCG2	337888	298301
4	A4	1	SCG2	61625.1	432.291
4	A4	2	SCG2	61786.9	679.822
4	A4	3	SCG2	62200.2	1178.87
4	A4	4	SCG2	61868.2	932.69
4	A4	5	SCG2	61504.6	654.819
4	A4	6	SCG2	60909.3	145.253
4	A4	7	SCG2	60496.9	-181.38
4	A4	8	SCG2	59730.9	-861.641
4	A4	9	SCG2	59541.1	-965.664
4	A4	10	SCG2	59670	-750.996
4	A4	11	SCG2	59787.4	-547.871
4	A4	12	SCG2	59688.4	-561.078
4	A4	13	SCG2	59393.6	-770.124
4	A4	14	SCG2	59407.3	-670.679
4	A4	15	SCG2	59786.5	-205.737
4	A4	16	SCG2	60042.8	136.349
4	A4	17	SCG2	60256.1	435.369
4	A4	18	SCG2	60402.4	667.482
4	A4	19	SCG2	60336.1	686.893
4	A4	20	SCG2	60240.9	677.448
4	A4	21	SCG2	60371.6	893.96
4	A4	22	SCG2	61251.3	1859.37
4	A4	23	SCG2	61883.7	2577.56
4	A4	24	SCG2	64188.8	4968.41
4	A4	25	SCG2	68555	9420.41
4	A4	26	SCG2	75761.8	16712.9
4	A4	27	SCG2	89834.8	30871.7
4	A4	28	SCG2	112358	53481.2
4	A4	29	SCG2	146631	87839.3
4	A4	30	SCG2	190060	131354
4	A4	31	SCG2	235059	176438
4	A4	32	SCG2	274435	215901
4	A4	33	SCG2	306003	247555
4	A4	34	SCG2	328852	270489
4	A4	35	SCG2	345469	287192
4	A4	36	SCG2	358013	299822
4	A4	37	SCG2	367666	309560
4	A4	38	SCG2	374423	316403
4	A4	39	SCG2	378623	320689
4	A4	40	SCG2	381142	323294
5	A5	1	SCG2	17829.8	1603.64
5	A5	2	SCG2	16987.8	1390.53
5	A5	3	SCG2	15589.3	620.893
5	A5	4	SCG2	14925.5	586.029
5	A5	5	SCG2	13989.8	279.239
5	A5	6	SCG2	12469.4	-612.186
5	A5	7	SCG2	11817.5	-635.169
5	A5	8	SCG2	11174.5	-649.299
5	A5	9	SCG2	10731.4	-463.424
5	A5	10	SCG2	10472.5	-93.429
5	A5	11	SCG2	10127.6	190.542
5	A5	12	SCG2	9349.33	41.2155
5	A5	13	SCG2	8942.46	263.268
5	A5	14	SCG2	8332.31	282.03
5	A5	15	SCG2	7611.65	190.29
5	A5	16	SCG2	7494.4	701.951
5	A5	17	SCG2	7823.72	1660.2
5	A5	18	SCG2	7696.16	2161.55
5	A5	19	SCG2	7110.02	2204.33
5	A5	20	SCG2	6920.56	2643.79
5	A5	21	SCG2	7085.83	3437.97
5	A5	22	SCG2	7812.5	4793.56
5	A5	23	SCG2	8096.48	5706.45
5	A5	24	SCG2	9146.47	7385.36
5	A5	25	SCG2	12554.5	11422.3
5	A5	26	SCG2	18742.5	18239.2
5	A5	27	SCG2	29761.4	29887
5	A5	28	SCG2	49120.7	49875.3
5	A5	29	SCG2	79198.1	80581.6
5	A5	30	SCG2	119757	121769
5	A5	31	SCG2	164779	167421
5	A5	32	SCG2	204674	207945
5	A5	33	SCG2	236933	240832
5	A5	34	SCG2	261504	266032
5	A5	35	SCG2	278940	284097
5	A5	36	SCG2	291485	297271
5	A5	37	SCG2	300578	306992
5	A5	38	SCG2	306991	314035
5	A5	39	SCG2	311206	318878
5	A5	40	SCG2	314349	322650
6	A6	1	SCG2	-4352.8	133
6	A6	2	SCG2	-4344.59	227.47
6	A6	3	SCG2	-4462.59	195.727
6	A6	4	SCG2	-4581.22	163.348
6	A6	5	SCG2	-4672.59	158.234
6	A6	6	SCG2	-4699.1	217.978
6	A6	7	SCG2	-5141.93	-138.597
6	A6	8	SCG2	-5356.27	-266.673
6	A6	9	SCG2	-5563.22	-387.375
6	A6	10	SCG2	-5940.58	-678.473
6	A6	11	SCG2	-5827.72	-479.365
6	A6	12	SCG2	-4937.75	496.862
6	A6	13	SCG2	-4921.57	599.298
6	A6	14	SCG2	-5435.05	172.071
6	A6	15	SCG2	-5687.79	5.5878
6	A6	16	SCG2	-5838.26	-58.6225
6	A6	17	SCG2	-6117.53	-251.635
6	A6	18	SCG2	-6004.94	-52.7951
6	A6	19	SCG2	-5294.76	743.643
6	A6	20	SCG2	-5178.02	946.641
6	A6	21	SCG2	-4912.83	1298.08
6	A6	22	SCG2	-3786.34	2510.83
6	A6	23	SCG2	-2015.29	4368.13
6	A6	24	SCG2	1090.79	7560.47
6	A6	25	SCG2	6783.37	13339.3
6	A6	26	SCG2	17679.9	24322.1
6	A6	27	SCG2	36965.3	43693.8
6	A6	28	SCG2	66814.4	73629.1
6	A6	29	SCG2	106511	113412
6	A6	30	SCG2	149939	156926
6	A6	31	SCG2	189090	196163
6	A6	32	SCG2	219456	226615
6	A6	33	SCG2	241913	249159
6	A6	34	SCG2	259216	266549
6	A6	35	SCG2	272015	279433
6	A6	36	SCG2	280614	288119
6	A6	37	SCG2	286986	294577
6	A6	38	SCG2	291726	299403
6	A6	39	SCG2	294740	302504
6	A6	40	SCG2	296457	304307
7	A7	1	SCG2	39503.4	-220.19
7	A7	2	SCG2	39683	-82.5201
7	A7	3	SCG2	39920.6	113.123
7	A7	4	SCG2	39738	-111.363
7	A7	5	SCG2	39740.2	-151.029
7	A7	6	SCG2	40150.2	217.024
7	A7	7	SCG2	40164.3	189.171
7	A7	8	SCG2	39995.8	-21.1861
7	A7	9	SCG2	39605.1	-453.86
7	A7	10	SCG2	39634.6	-466.225
7	A7	11	SCG2	40257.8	115.02
7	A7	12	SCG2	40430	245.3
7	A7	13	SCG2	40635.8	409.208
7	A7	14	SCG2	40355.1	86.5775
7	A7	15	SCG2	40350.8	40.3923
7	A7	16	SCG2	40771.8	419.457
7	A7	17	SCG2	40076.3	-317.912
7	A7	18	SCG2	39967.9	-468.269
7	A7	19	SCG2	40583.9	105.812
7	A7	20	SCG2	40627.4	107.462
7	A7	21	SCG2	40503.2	-58.7034
7	A7	22	SCG2	40477.5	-126.307
7	A7	23	SCG2	40963.6	317.946
7	A7	24	SCG2	41704	1016.42
7	A7	25	SCG2	42029.8	1300.33
7	A7	26	SCG2	43295.7	2524.31
7	A7	27	SCG2	44702	3888.65
7	A7	28	SCG2	48049.6	7194.35
7	A7	29	SCG2	54071.9	13174.8
7	A7	30	SCG2	66205.6	25266.5
7	A7	31	SCG2	87262.5	46281.5
7	A7	32	SCG2	119270	78247.5
7	A7	33	SCG2	163225	122160
7	A7	34	SCG2	212167	171060
7	A7	35	SCG2	256916	215767
7	A7	36	SCG2	291824	250633
7	A7	37	SCG2	318764	277531
7	A7	38	SCG2	338399	297124
7	A7	39	SCG2	352001	310684
7	A7	40	SCG2	360789	319431
8	A8	1	SCG2	56067.8	990.942
8	A8	2	SCG2	55978.3	1066.91
8	A8	3	SCG2	55801.5	1055.52
8	A8	4	SCG2	55396.2	815.691
8	A8	5	SCG2	54978.4	563.418
8	A8	6	SCG2	54081.1	-168.446
8	A8	7	SCG2	53355.7	-728.353
8	A8	8	SCG2	53161.9	-756.744
8	A8	9	SCG2	53222.1	-531.029
8	A8	10	SCG2	53174.1	-413.627
8	A8	11	SCG2	53076	-346.174
8	A8	12	SCG2	53034.4	-222.393
8	A8	13	SCG2	52921.3	-170.018
8	A8	14	SCG2	52752.8	-173.03
8	A8	15	SCG2	52674.9	-85.433
8	A8	16	SCG2	52622.5	27.5706
8	A8	17	SCG2	52160.7	-268.75
8	A8	18	SCG2	52129.3	-134.7
8	A8	19	SCG2	52514.2	415.722
8	A8	20	SCG2	52592.8	659.718
8	A8	21	SCG2	52228.6	461.054
8	A8	22	SCG2	52159.9	557.784
8	A8	23	SCG2	52476.9	1040.25
8	A8	24	SCG2	53057.3	1786.1
8	A8	25	SCG2	53469.8	2364.11
8	A8	26	SCG2	54883	3942.78
8	A8	27	SCG2	57133.6	6358.8
8	A8	28	SCG2	61607.9	10998.5
8	A8	29	SCG2	69651.7	19207.9
8	A8	30	SCG2	83701.8	33423.4
8	A8	31	SCG2	107936	57822.6
8	A8	32	SCG2	144357	94409.8
8	A8	33	SCG2	189250	139468
8	A8	34	SCG2	234781	185164
8	A8	35	SCG2	272585	223134
8	A8	36	SCG2	302110	252825
8	A8	37	SCG2	324919	275799
8	A8	38	SCG2	341590	292636
8	A8	39	SCG2	352443	303654
8	A8	40	SCG2	359624	311000
9	A9	1	SCG2	19828.8	1469.34
9	A9	2	SCG2	19809.2	1816.44
9	A9	3	SCG2	19088.9	1462.92
9	A9	4	SCG2	18022.7	763.485
9	A9	5	SCG2	17377	484.444
9	A9	6	SCG2	16822.9	297.154
9	A9	7	SCG2	15866.1	-292.921
9	A9	8	SCG2	14745.4	-1046.89
9	A9	9	SCG2	14443.8	-981.721
9	A9	10	SCG2	14551.1	-507.65
9	A9	11	SCG2	14091.2	-600.89
9	A9	12	SCG2	13353.2	-972.119
9	A9	13	SCG2	13266.1	-692.426
9	A9	14	SCG2	13681	89.2383
9	A9	15	SCG2	13052.8	-172.262
9	A9	16	SCG2	12779.2	-79.1336
9	A9	17	SCG2	12696.8	205.234
9	A9	18	SCG2	12628.6	503.791
9	A9	19	SCG2	12543	784.949
9	A9	20	SCG2	12146.1	754.796
9	A9	21	SCG2	12114.8	1090.24
9	A9	22	SCG2	12401.1	1743.22
9	A9	23	SCG2	12455.9	2164.79
9	A9	24	SCG2	12628	2703.63
9	A9	25	SCG2	13541.3	3983.73
9	A9	26	SCG2	14214.3	5023.39
9	A9	27	SCG2	16148.5	7324.4
9	A9	28	SCG2	19697.3	11240
9	A9	29	SCG2	27673.7	19583.1
9	A9	30	SCG2	42118.9	34395
9	A9	31	SCG2	65787.3	58430.1
9	A9	32	SCG2	101372	94381.6
9	A9	33	SCG2	146053	139429
9	A9	34	SCG2	192059	185802
9	A9	35	SCG2	230330	224440
9	A9	36	SCG2	259006	253483
9	A9	37	SCG2	282234	277077
9	A9	38	SCG2	299395	294605
9	A9	39	SCG2	311178	306755
9	A9	40	SCG2	318907	314850
10	A10	1	ACTIN	37816.5	-117.424
10	A10	2	ACTIN	38170.8	85.0323
10	A10	3	ACTIN	38333.9	96.3279
10	A10	4	ACTIN	38534.3	144.854
10	A10	5	ACTIN	38346.2	-195.065
10	A10	6	ACTIN	38375.2	-317.922
10	A10	7	ACTIN	39004.9	159.983
10	A10	8	ACTIN	39108.6	111.822
10	A10	9	ACTIN	39439.9	291.242
10	A10	10	ACTIN	40316.1	1015.6
10	A10	11	ACTIN	41426.3	1974.04
10	A10	12	ACTIN	43463.9	3859.72
10	A10	13	ACTIN	47551.6	7795.66
10	A10	14	ACTIN	55133.9	15226.1
10	A10	15	ACTIN	67914.1	27854.4
10	A10	16	ACTIN	90422.8	50211.3
10	A10	17	ACTIN	126136	85772.9
10	A10	18	ACTIN	173876	133361
10	A10	19	ACTIN	227305	186638
10	A10	20	ACTIN	274677	233858
10	A10	21	ACTIN	310481	269510
10	A10	22	ACTIN	335192	294069
10	A10	23	ACTIN	352201	310926
10	A10	24	ACTIN	364706	323280
10	A10	25	ACTIN	373198	331619
10	A10	26	ACTIN	379232	337502
10	A10	27	ACTIN	384755	342874
10	A10	28	ACTIN	387955	345922
10	A10	29	ACTIN	390277	348091
10	A10	30	ACTIN	391503	349166
10	A10	31	ACTIN	392218	349729
10	A10	32	ACTIN	392572	349931
10	A10	33	ACTIN	392643	349851
10	A10	34	ACTIN	392262	349317
10	A10	35	ACTIN	392354	349258
10	A10	36	ACTIN	391873	348624
10	A10	37	ACTIN	391432	348032
10	A10	38	ACTIN	390583	347031
10	A10	39	ACTIN	389717	346013
10	A10	40	ACTIN	389218	345362
11	A11	1	ACTIN	85449.5	1671.4
11	A11	2	ACTIN	84729.4	1169.59
11	A11	3	ACTIN	84142.3	800.682
11	A11	4	ACTIN	83608.8	485.461
11	A11	5	ACTIN	82536.6	-368.472
11	A11	6	ACTIN	82054.1	-632.788
11	A11	7	ACTIN	81405.8	-1062.86
11	A11	8	ACTIN	81511.9	-738.458
11	A11	9	ACTIN	82553.6	521.469
11	A11	10	ACTIN	82808.9	994.966
11	A11	11	ACTIN	83239.7	1643.99
11	A11	12	ACTIN	83902.4	2524.99
11	A11	13	ACTIN	85384.7	4225.48
11	A11	14	ACTIN	88091.9	7150.92
11	A11	15	ACTIN	93613.4	12890.6
11	A11	16	ACTIN	104840	24335.7
11	A11	17	ACTIN	124980	44693.4
11	A11	18	ACTIN	158038	77970.3
11	A11	19	ACTIN	203924	124074
11	A11	20	ACTIN	257740	178108
11	A11	21	ACTIN	309081	229668
11	A11	22	ACTIN	348707	269512
11	A11	23	ACTIN	376223	297246
11	A11	24	ACTIN	394551	315792
11	A11	25	ACTIN	407327	328787
11	A11	26	ACTIN	416783	338460
11	A11	27	ACTIN	423933	345829
11	A11	28	ACTIN	428472	350587
11	A11	29	ACTIN	431936	354269
11	A11	30	ACTIN	434409	356960
11	A11	31	ACTIN	436257	359026
11	A11	32	ACTIN	436456	359444
11	A11	33	ACTIN	436852	360058
11	A11	34	ACTIN	437136	360560
11	A11	35	ACTIN	436584	360226
11	A11	36	ACTIN	435704	359565
11	A11	37	ACTIN	435271	359349
11	A11	38	ACTIN	435121	359418
11	A11	39	ACTIN	434215	358730
11	A11	40	ACTIN	433728	358462
12	A12	1	ACTIN	28661.3	281.777
12	A12	2	ACTIN	28611.6	167.891
12	A12	3	ACTIN	28499.4	-8.58438
12	A12	4	ACTIN	28517.8	-54.4582
12	A12	5	ACTIN	28702.9	66.3809
12	A12	6	ACTIN	28765.7	64.9504
12	A12	7	ACTIN	28696.7	-68.2887
12	A12	8	ACTIN	28760.6	-68.6312
12	A12	9	ACTIN	29331	437.518
12	A12	10	ACTIN	30050.5	1092.81
12	A12	11	ACTIN	30904.3	1882.33
12	A12	12	ACTIN	32088.9	3002.71
12	A12	13	ACTIN	35116	5965.56
12	A12	14	ACTIN	40995.5	11780.8
12	A12	15	ACTIN	51927	22648
12	A12	16	ACTIN	70569.6	41226.4
12	A12	17	ACTIN	101125	71717.5
12	A12	18	ACTIN	144881	115409
12	A12	19	ACTIN	197742	168206
12	A12	20	ACTIN	248614	219014
12	A12	21	ACTIN	289112	259447
12	A12	22	ACTIN	316958	287229
12	A12	23	ACTIN	335618	305825
12	A12	24	ACTIN	349103	319246
12	A12	25	ACTIN	359343	329422
12	A12	26	ACTIN	367157	337171
12	A12	27	ACTIN	372588	342538
12	A12	28	ACTIN	375755	345640
12	A12	29	ACTIN	378452	348274
12	A12	30	ACTIN	380491	350249
12	A12	31	ACTIN	382094	351787
12	A12	32	ACTIN	382268	351897
12	A12	33	ACTIN	381574	351139
12	A12	34	ACTIN	381185	350685
12	A12	35	ACTIN	381648	351084
12	A12	36	ACTIN	381562	350934
12	A12	37	ACTIN	381104	350412
12	A12	38	ACTIN	379848	349091
12	A12	39	ACTIN	378946	348125
12	A12	40	ACTIN	379115	348230
13	B1	1	SCG2	50086.3	-519.027
13	B1	2	SCG2	50009.5	-433.2
13	B1	3	SCG2	49995.2	-284.87
13	B1	4	SCG2	50362.4	244.98
13	B1	5	SCG2	50201.5	246.709
13	B1	6	SCG2	50021.3	229.126
13	B1	7	SCG2	50005.7	376.156
13	B1	8	SCG2	49924.8	457.842
13	B1	9	SCG2	49856.5	552.176
13	B1	10	SCG2	49119.8	-21.9698
13	B1	11	SCG2	48663.8	-315.323
13	B1	12	SCG2	47928.9	-887.543
13	B1	13	SCG2	47820	-833.877
13	B1	14	SCG2	48152.6	-338.651
13	B1	15	SCG2	47935.4	-393.235
13	B1	16	SCG2	47921.3	-244.697
13	B1	17	SCG2	48192.3	188.93
13	B1	18	SCG2	47656.8	-183.993
13	B1	19	SCG2	47544.8	-133.303
13	B1	20	SCG2	47792	276.516
13	B1	21	SCG2	47946.1	593.151
13	B1	22	SCG2	47662.2	471.876
13	B1	23	SCG2	47578.9	551.234
13	B1	24	SCG2	47639.2	774.197
13	B1	25	SCG2	47713.5	1011.06
13	B1	26	SCG2	48215.8	1675.95
13	B1	27	SCG2	49450.2	3073.01
13	B1	28	SCG2	52216.4	6001.8
13	B1	29	SCG2	56296	10244
13	B1	30	SCG2	64141.6	18252.2
13	B1	31	SCG2	79331.2	33604.5
13	B1	32	SCG2	104817	59253.2
13	B1	33	SCG2	142514	97112.7
13	B1	34	SCG2	189371	144132
13	B1	35	SCG2	237093	192017
13	B1	36	SCG2	279268	234354
13	B1	37	SCG2	313735	268984
13	B1	38	SCG2	339216	294628
13	B1	39	SCG2	357685	313259
13	B1	40	SCG2	371039	326776
14	B2	1	SCG2	46929.4	-364.715
14	B2	2	SCG2	46598.7	-585.149
14	B2	3	SCG2	46419.8	-653.786
14	B2	4	SCG2	46837.2	-126.139
14	B2	5	SCG2	47278.6	425.525
14	B2	6	SCG2	47299.1	556.211
14	B2	7	SCG2	47333.2	700.589
14	B2	8	SCG2	46662.5	140.143
14	B2	9	SCG2	46254.7	-157.373
14	B2	10	SCG2	45709.2	-592.706
14	B2	11	SCG2	45536.8	-654.777
14	B2	12	SCG2	45653.2	-428.176
14	B2	13	SCG2	45817.9	-153.22
14	B2	14	SCG2	46069.1	208.197
14	B2	15	SCG2	46094.6	343.931
14	B2	16	SCG2	45974.7	334.293
14	B2	17	SCG2	45758.3	228.125
14	B2	18	SCG2	45613.8	193.87
14	B2	19	SCG2	45450.1	140.49
14	B2	20	SCG2	45123.1	-76.2956
14	B2	21	SCG2	44935.2	-153.933
14	B2	22	SCG2	44704	-274.969
14	B2	23	SCG2	44823.3	-45.376
14	B2	24	SCG2	45511.2	752.748
14	B2	25	SCG2	45720.2	1071.98
14	B2	26	SCG2	46272.5	1734.59
14	B2	27	SCG2	46902.3	2474.64
14	B2	28	SCG2	48001.8	3684.32
14	B2	29	SCG2	51475.2	7268.02
14	B2	30	SCG2	57145.1	13048.2
14	B2	31	SCG2	67608.9	23622.2
14	B2	32	SCG2	85675.1	41798.6
14	B2	33	SCG2	114923	71157.3
14	B2	34	SCG2	155838	112182
14	B2	35	SCG2	202426	158881
14	B2	36	SCG2	247077	203641
14	B2	37	SCG2	284282	240956
14	B2	38	SCG2	313620	270405
14	B2	39	SCG2	336473	293368
14	B2	40	SCG2	352166	309171
15	B3	1	SCG2	43280	51.1917
15	B3	2	SCG2	43213.5	49.074
15	B3	3	SCG2	42925.1	-174.923
15	B3	4	SCG2	42816	-219.646
15	B3	5	SCG2	42976.7	5.38906
15	B3	6	SCG2	42915.1	8.20502
15	B3	7	SCG2	42854	11.4428
15	B3	8	SCG2	43012.1	233.954
15	B3	9	SCG2	42778.6	64.8443
15	B3	10	SCG2	42670.4	20.9454
15	B3	11	SCG2	42883.2	298.117
15	B3	12	SCG2	42831.9	311.241
15	B3	13	SCG2	42114.7	-341.591
15	B3	14	SCG2	41974.1	-417.771
15	B3	15	SCG2	42379.5	52.0017
15	B3	16	SCG2	42506.2	243.029
15	B3	17	SCG2	42286.6	87.8329
15	B3	18	SCG2	42165.9	31.5004
15	B3	19	SCG2	42200.7	130.641
15	B3	20	SCG2	42109.3	103.667
15	B3	21	SCG2	41492.4	-448.88
15	B3	22	SCG2	41441.4	-435.474
15	B3	23	SCG2	41959.7	147.178
15	B3	24	SCG2	42500.6	752.423
15	B3	25	SCG2	42930.5	1246.68
15	B3	26	SCG2	43036	1416.62
15	B3	27	SCG2	43832.6	2277.51
15	B3	28	SCG2	46126.4	4635.69
15	B3	29	SCG2	50694.9	9268.62
15	B3	30	SCG2	58548.2	17186.3
15	B3	31	SCG2	73629.5	32331.9
15	B3	32	SCG2	97697.9	56464.7
15	B3	33	SCG2	134203	93033.9
15	B3	34	SCG2	179631	138526
15	B3	35	SCG2	224887	183847
15	B3	36	SCG2	263690	222714
15	B3	37	SCG2	295523	254612
15	B3	38	SCG2	319964	279117
15	B3	39	SCG2	338077	297294
15	B3	40	SCG2	349309	308591
16	B4	1	SCG2	47435.1	-327.159
16	B4	2	SCG2	47474	-354.585
16	B4	3	SCG2	47883.5	-11.4437
16	B4	4	SCG2	47993.4	32.1895
16	B4	5	SCG2	48230.3	202.764
16	B4	6	SCG2	48241.6	147.71
16	B4	7	SCG2	48296.4	136.202
16	B4	8	SCG2	48259	32.5152
16	B4	9	SCG2	48220.9	-71.8985
16	B4	10	SCG2	48267.8	-91.3044
16	B4	11	SCG2	48360.5	-64.9407
16	B4	12	SCG2	48141.1	-350.694
16	B4	13	SCG2	48087.4	-470.698
16	B4	14	SCG2	48382.2	-242.217
16	B4	15	SCG2	48620.5	-70.1619
16	B4	16	SCG2	49030.9	273.878
16	B4	17	SCG2	49167.8	344.495
16	B4	18	SCG2	49159.3	269.644
16	B4	19	SCG2	48889.9	-66.0393
16	B4	20	SCG2	48813.5	-208.812
16	B4	21	SCG2	49224.8	136.149
16	B4	22	SCG2	49956.5	801.54
16	B4	23	SCG2	51487.2	2265.97
16	B4	24	SCG2	53604.7	4317.19
16	B4	25	SCG2	57326.8	7972.96
16	B4	26	SCG2	65281.9	15861.8
16	B4	27	SCG2	79063	29576.5
16	B4	28	SCG2	101742	52189.4
16	B4	29	SCG2	137850	88230.9
16	B4	30	SCG2	184811	135126
16	B4	31	SCG2	235497	185746
16	B4	32	SCG2	279260	229442
16	B4	33	SCG2	313916	264031
16	B4	34	SCG2	340395	290444
16	B4	35	SCG2	358831	308814
16	B4	36	SCG2	373166	323083
16	B4	37	SCG2	383312	333163
16	B4	38	SCG2	391203	340987
16	B4	39	SCG2	396155	345873
16	B4	40	SCG2	399573	349225
17	B5	1	SCG2	47283	524.618
17	B5	2	SCG2	47056.1	380.891
17	B5	3	SCG2	46825.4	233.316
17	B5	4	SCG2	46728	219.159
17	B5	5	SCG2	46601.3	175.584
17	B5	6	SCG2	46457.9	115.267
17	B5	7	SCG2	46085	-174.41
17	B5	8	SCG2	45867.6	-308.665
17	B5	9	SCG2	45802.1	-290.982
17	B5	10	SCG2	45901.3	-108.713
17	B5	11	SCG2	45770.7	-156.167
17	B5	12	SCG2	45711.9	-131.796
17	B5	13	SCG2	45800.1	39.6169
17	B5	14	SCG2	45462.3	-215.056
17	B5	15	SCG2	45424.9	-169.279
17	B5	16	SCG2	45839.3	328.224
17	B5	17	SCG2	45884.6	456.696
17	B5	18	SCG2	45532.7	187.937
17	B5	19	SCG2	45060.9	-200.731
17	B5	20	SCG2	45127.2	-51.2203
17	B5	21	SCG2	45875.5	780.197
17	B5	22	SCG2	46559.8	1547.67
17	B5	23	SCG2	47917.6	2988.59
17	B5	24	SCG2	49603.3	4757.45
17	B5	25	SCG2	53232.5	8469.81
17	B5	26	SCG2	60370.4	15690.8
17	B5	27	SCG2	72684.9	28088.5
17	B5	28	SCG2	92883	48369.8
17	B5	29	SCG2	125631	81201.2
17	B5	30	SCG2	169631	125284
17	B5	31	SCG2	218129	173865
17	B5	32	SCG2	261646	217465
17	B5	33	SCG2	295658	251560
17	B5	34	SCG2	322132	278118
17	B5	35	SCG2	341724	297792
17	B5	36	SCG2	356142	312294
17	B5	37	SCG2	366885	323120
17	B5	38	SCG2	374140	330458
17	B5	39	SCG2	379028	335430
17	B5	40	SCG2	382016	338500
18	B6	1	SCG2	38819.8	-163.716
18	B6	2	SCG2	38754.9	-259.025
18	B6	3	SCG2	38803.9	-240.499
18	B6	4	SCG2	39158.1	83.2147
18	B6	5	SCG2	39281.1	175.862
18	B6	6	SCG2	39142.2	6.5173
18	B6	7	SCG2	39132.5	-33.6204
18	B6	8	SCG2	39418.9	222.375
18	B6	9	SCG2	39389.8	162.745
18	B6	10	SCG2	39018.2	-239.213
18	B6	11	SCG2	39008.3	-279.55
18	B6	12	SCG2	39444.3	125.984
18	B6	13	SCG2	39449.8	101.065
18	B6	14	SCG2	39224.4	-154.737
18	B6	15	SCG2	39227.5	-182.078
18	B6	16	SCG2	39614.7	174.683
18	B6	17	SCG2	39605.2	134.69
18	B6	18	SCG2	39493.4	-7.53406
18	B6	19	SCG2	39481.5	-49.9023
18	B6	20	SCG2	39870.4	308.585
18	B6	21	SCG2	40516	923.787
18	B6	22	SCG2	40875	1252.3
18	B6	23	SCG2	42651.7	2998.63
18	B6	24	SCG2	46018.9	6335.39
18	B6	25	SCG2	52346.5	12632.5
18	B6	26	SCG2	63501.7	23757.3
18	B6	27	SCG2	82369.9	42595
18	B6	28	SCG2	112443	72637.9
18	B6	29	SCG2	155292	115456
18	B6	30	SCG2	204621	164755
18	B6	31	SCG2	250712	210815
18	B6	32	SCG2	288137	248210
18	B6	33	SCG2	316332	276375
18	B6	34	SCG2	336656	296668
18	B6	35	SCG2	351885	311867
18	B6	36	SCG2	362991	322942
18	B6	37	SCG2	370876	330797
18	B6	38	SCG2	376370	336260
18	B6	39	SCG2	380572	340432
18	B6	40	SCG2	383830	343660
19	B7	1	SCG2	44567.7	-1043.54
19	B7	2	SCG2	44911	-730.641
19	B7	3	SCG2	45513.9	-158.027
19	B7	4	SCG2	45840.5	138.201
19	B7	5	SCG2	46044.8	312.233
19	B7	6	SCG2	45947.5	184.581
19	B7	7	SCG2	45780.1	-13.195
19	B7	8	SCG2	45667.3	-156.284
19	B7	9	SCG2	45699.3	-154.67
19	B7	10	SCG2	45611	-273.294
19	B7	11	SCG2	45627	-287.645
19	B7	12	SCG2	45892.7	-52.2765
19	B7	13	SCG2	46039.7	64.3729
19	B7	14	SCG2	45986.1	-19.5364
19	B7	15	SCG2	46180.3	144.359
19	B7	16	SCG2	46486.2	419.868
19	B7	17	SCG2	46206.4	109.748
19	B7	18	SCG2	46017.4	-109.599
19	B7	19	SCG2	46008.5	-148.837
19	B7	20	SCG2	45995.2	-192.383
19	B7	21	SCG2	46350.8	132.86
19	B7	22	SCG2	46577.8	329.482
19	B7	23	SCG2	46828.8	550.128
19	B7	24	SCG2	47088.6	779.672
19	B7	25	SCG2	47347.2	1007.88
19	B7	26	SCG2	48995.5	2625.89
19	B7	27	SCG2	51033.7	4633.69
19	B7	28	SCG2	54171	7740.7
19	B7	29	SCG2	60792.1	14331.5
19	B7	30	SCG2	73723.1	27232.1
19	B7	31	SCG2	96477.7	49956.4
19	B7	32	SCG2	131727	85175.4
19	B7	33	SCG2	178924	132342
19	B7	34	SCG2	231132	184520
19	B7	35	SCG2	278376	231734
19	B7	36	SCG2	316069	269396
19	B7	37	SCG2	345661	298958
19	B7	38	SCG2	368023	321289
19	B7	39	SCG2	383325	336561
19	B7	40	SCG2	393676	346881
20	B8	1	SCG2	40770.1	-519
20	B8	2	SCG2	40873.9	-424.149
20	B8	3	SCG2	41117.2	-189.747
20	B8	4	SCG2	41178.7	-137.295
20	B8	5	SCG2	41387.5	62.5917
20	B8	6	SCG2	41399.4	65.5287
20	B8	7	SCG2	41466.1	123.251
20	B8	8	SCG2	41410.1	58.3207
20	B8	9	SCG2	41422.5	61.7421
20	B8	10	SCG2	41628	258.218
20	B8	11	SCG2	41595	216.331
20	B8	12	SCG2	41500	112.342
20	B8	13	SCG2	41294.2	-102.471
20	B8	14	SCG2	41150.9	-254.655
20	B8	15	SCG2	40983.2	-431.327
20	B8	16	SCG2	41076.5	-346.992
20	B8	17	SCG2	41741.6	309.078
20	B8	18	SCG2	41730.6	289.179
20	B8	19	SCG2	41321.9	-128.481
20	B8	20	SCG2	41242.2	-217.189
20	B8	21	SCG2	41541.2	72.8262
20	B8	22	SCG2	41656.1	178.748
20	B8	23	SCG2	41732	245.673
20	B8	24	SCG2	42307.4	812.165
20	B8	25	SCG2	42736.8	1232.61
20	B8	26	SCG2	43948.8	2435.6
20	B8	27	SCG2	45878.5	4356.32
20	B8	28	SCG2	49075.4	7544.31
20	B8	29	SCG2	55347.5	13807.4
20	B8	30	SCG2	67689.6	26140.6
20	B8	31	SCG2	88965.1	47407
20	B8	32	SCG2	122327	80760.3
20	B8	33	SCG2	168291	126715
20	B8	34	SCG2	219855	178270
20	B8	35	SCG2	266837	225243
20	B8	36	SCG2	304834	263232
20	B8	37	SCG2	333958	292347
20	B8	38	SCG2	354991	313370
20	B8	39	SCG2	370186	328557
20	B8	40	SCG2	379732	338093
21	B9	1	SCG2	30497	-1552.95
21	B9	2	SCG2	30979.6	-1001.86
21	B9	3	SCG2	31553.5	-359.434
21	B9	4	SCG2	32015	170.459
21	B9	5	SCG2	31922.5	146.463
21	B9	6	SCG2	31753.4	45.797
21	B9	7	SCG2	31751.5	112.346
21	B9	8	SCG2	31959.1	388.473
21	B9	9	SCG2	31853	350.839
21	B9	10	SCG2	31603.6	169.862
21	B9	11	SCG2	31301.6	-63.6101
21	B9	12	SCG2	30817.6	-479.137
21	B9	13	SCG2	30701.5	-526.838
21	B9	14	SCG2	30947.4	-212.473
21	B9	15	SCG2	30994.5	-96.8338
21	B9	16	SCG2	30955.3	-67.6402
21	B9	17	SCG2	30875.6	-78.851
21	B9	18	SCG2	30881.9	-4.0226
21	B9	19	SCG2	30811.6	-5.88371
21	B9	20	SCG2	30763	14.011
21	B9	21	SCG2	30911.9	231.369
21	B9	22	SCG2	30877.2	265.105
21	B9	23	SCG2	30965.3	421.635
21	B9	24	SCG2	31365.2	890.035
21	B9	25	SCG2	31785.7	1378.96
21	B9	26	SCG2	32702.4	2364.12
21	B9	27	SCG2	33986.3	3716.52
21	B9	28	SCG2	36971.2	6769.87
21	B9	29	SCG2	43220.2	13087.4
21	B9	30	SCG2	53709.5	23645.2
21	B9	31	SCG2	73307.5	43311.6
21	B9	32	SCG2	104893	74965.9
21	B9	33	SCG2	150877	121018
21	B9	34	SCG2	206846	177055
21	B9	35	SCG2	261281	231559
21	B9	36	SCG2	306078	276424
21	B9	37	SCG2	340577	310992
21	B9	38	SCG2	365418	335901
21	B9	39	SCG2	383739	354291
21	B9	40	SCG2	395509	366130
22	B10	1	ACTIN	38885.1	-511.625
22	B10	2	ACTIN	39008.8	-566.103
22	B10	3	ACTIN	39230.6	-522.393
22	B10	4	ACTIN	40118.6	187.427
22	B10	5	ACTIN	40559.1	449.715
22	B10	6	ACTIN	40509.7	222.195
22	B10	7	ACTIN	40450.1	-15.5287
22	B10	8	ACTIN	40406.7	-237.166
22	B10	9	ACTIN	40737.7	-84.2492
22	B10	10	ACTIN	41372	371.906
22	B10	11	ACTIN	42385.9	1207.57
22	B10	12	ACTIN	43479.1	2122.62
22	B10	13	ACTIN	45488.8	3954.15
22	B10	14	ACTIN	50164.4	8451.66
22	B10	15	ACTIN	58750.9	16860
22	B10	16	ACTIN	74249.6	32180.5
22	B10	17	ACTIN	101247	58999.8
22	B10	18	ACTIN	142493	100068
22	B10	19	ACTIN	197024	154421
22	B10	20	ACTIN	255958	213176
22	B10	21	ACTIN	307676	264716
22	B10	22	ACTIN	344575	301437
22	B10	23	ACTIN	369480	326164
22	B10	24	ACTIN	386513	343019
22	B10	25	ACTIN	398453	354781
22	B10	26	ACTIN	407765	363914
22	B10	27	ACTIN	414377	370348
22	B10	28	ACTIN	419301	375094
22	B10	29	ACTIN	422442	378057
22	B10	30	ACTIN	424997	380434
22	B10	31	ACTIN	426326	381585
22	B10	32	ACTIN	427611	382691
22	B10	33	ACTIN	427899	382801
22	B10	34	ACTIN	427915	382639
22	B10	35	ACTIN	427664	382210
22	B10	36	ACTIN	426838	381206
22	B10	37	ACTIN	426131	380321
22	B10	38	ACTIN	426023	380035
22	B10	39	ACTIN	425109	378942
22	B10	40	ACTIN	424881	378536
23	B11	1	ACTIN	38969.2	-239.248
23	B11	2	ACTIN	39243.6	-340.77
23	B11	3	ACTIN	39804.7	-155.647
23	B11	4	ACTIN	40233.2	-103.021
23	B11	5	ACTIN	40834	121.844
23	B11	6	ACTIN	41308.4	220.322
23	B11	7	ACTIN	41619.3	155.32
23	B11	8	ACTIN	41726.5	-113.409
23	B11	9	ACTIN	42193.8	-21.994
23	B11	10	ACTIN	42488.3	-103.414
23	B11	11	ACTIN	42971.3	3.64565
23	B11	12	ACTIN	44425.2	1081.61
23	B11	13	ACTIN	47482.8	3763.25
23	B11	14	ACTIN	52694.9	8599.43
23	B11	15	ACTIN	62385.5	17914.1
23	B11	16	ACTIN	80052.9	35205.6
23	B11	17	ACTIN	109593	64370.2
23	B11	18	ACTIN	154412	108813
23	B11	19	ACTIN	212094	166119
23	B11	20	ACTIN	273238	226887
23	B11	21	ACTIN	325199	278472
23	B11	22	ACTIN	362722	315619
23	B11	23	ACTIN	388291	340812
23	B11	24	ACTIN	406507	358652
23	B11	25	ACTIN	420136	371905
23	B11	26	ACTIN	429765	381159
23	B11	27	ACTIN	436920	387938
23	B11	28	ACTIN	442140	392782
23	B11	29	ACTIN	445913	396179
23	B11	30	ACTIN	448724	398614
23	B11	31	ACTIN	450278	399792
23	B11	32	ACTIN	451242	400380
23	B11	33	ACTIN	451566	400328
23	B11	34	ACTIN	451591	399977
23	B11	35	ACTIN	451104	399114
23	B11	36	ACTIN	451050	398685
23	B11	37	ACTIN	450396	397654
23	B11	38	ACTIN	449807	396689
23	B11	39	ACTIN	448804	395310
23	B11	40	ACTIN	448354	394485
24	B12	1	ACTIN	32967.3	-1556.28
24	B12	2	ACTIN	33133.6	-1699.07
24	B12	3	ACTIN	34918.5	-223.251
24	B12	4	ACTIN	35494.8	43.9277
24	B12	5	ACTIN	35930.3	170.364
24	B12	6	ACTIN	36295.5	226.468
24	B12	7	ACTIN	36294.7	-83.4823
24	B12	8	ACTIN	36613.2	-74.0304
24	B12	9	ACTIN	36936.3	-59.9965
24	B12	10	ACTIN	37479.4	173.951
24	B12	11	ACTIN	38355	740.438
24	B12	12	ACTIN	38964.9	1041.24
24	B12	13	ACTIN	40812.7	2579.98
24	B12	14	ACTIN	44719	6177.2
24	B12	15	ACTIN	52561.9	13711
24	B12	16	ACTIN	66867	27707
24	B12	17	ACTIN	91565.4	52096.3
24	B12	18	ACTIN	129988	90209.5
24	B12	19	ACTIN	182557	142470
24	B12	20	ACTIN	242227	201831
24	B12	21	ACTIN	295791	255086
24	B12	22	ACTIN	335998	294983
24	B12	23	ACTIN	363570	322246
24	B12	24	ACTIN	382335	340702
24	B12	25	ACTIN	396103	354161
24	B12	26	ACTIN	405946	363695
24	B12	27	ACTIN	413648	371088
24	B12	28	ACTIN	418778	375909
24	B12	29	ACTIN	422696	379518
24	B12	30	ACTIN	425014	381527
24	B12	31	ACTIN	427223	383426
24	B12	32	ACTIN	428210	384104
24	B12	33	ACTIN	428521	384107
24	B12	34	ACTIN	428113	383389
24	B12	35	ACTIN	427679	382646
24	B12	36	ACTIN	426588	381247
24	B12	37	ACTIN	426116	380465
24	B12	38	ACTIN	426197	380237
24	B12	39	ACTIN	425683	379413
24	B12	40	ACTIN	424795	378216
25	C1	1	SCG2	51289.8	-157.569
25	C1	2	SCG2	51348.8	1.00471
25	C1	3	SCG2	51471.5	223.43
25	C1	4	SCG2	51419.6	271.211
25	C1	5	SCG2	51423.5	374.706
25	C1	6	SCG2	50779.2	-169.907
25	C1	7	SCG2	50583.7	-265.716
25	C1	8	SCG2	50896.7	146.912
25	C1	9	SCG2	50963.7	313.525
25	C1	10	SCG2	50586.3	35.8409
25	C1	11	SCG2	50311.5	-139.331
25	C1	12	SCG2	49899.6	-451.531
25	C1	13	SCG2	49509.7	-741.817
25	C1	14	SCG2	49485.5	-666.29
25	C1	15	SCG2	49903.8	-148.419
25	C1	16	SCG2	49968.2	15.6818
25	C1	17	SCG2	50088.1	235.228
25	C1	18	SCG2	50013.2	260.04
25	C1	19	SCG2	49871	217.477
25	C1	20	SCG2	49705.8	151.961
25	C1	21	SCG2	49669.3	215.105
25	C1	22	SCG2	49732.8	378.206
25	C1	23	SCG2	48998.6	-256.314
25	C1	24	SCG2	49024.5	-130.685
25	C1	25	SCG2	49958.3	902.682
25	C1	26	SCG2	50348	1392.09
25	C1	27	SCG2	51119	2262.79
25	C1	28	SCG2	53086.3	4329.67
25	C1	29	SCG2	56298.2	7641.27
25	C1	30	SCG2	62889.8	14332.5
25	C1	31	SCG2	74345.3	25887.7
25	C1	32	SCG2	94431.3	46073.3
25	C1	33	SCG2	126926	78667.9
25	C1	34	SCG2	171093	122934
25	C1	35	SCG2	221688	173629
25	C1	36	SCG2	267905	219946
25	C1	37	SCG2	306015	258155
25	C1	38	SCG2	336073	288313
25	C1	39	SCG2	359099	311439
25	C1	40	SCG2	374468	326907
26	C2	1	SCG2	47547.2	-493.368
26	C2	2	SCG2	47767.2	-250.032
26	C2	3	SCG2	47625.6	-368.278
26	C2	4	SCG2	47575.3	-395.219
26	C2	5	SCG2	47812.5	-134.687
26	C2	6	SCG2	47980.3	56.5362
26	C2	7	SCG2	48144.4	243.99
26	C2	8	SCG2	48027.8	150.728
26	C2	9	SCG2	47903.3	49.6078
26	C2	10	SCG2	47798	-32.3723
26	C2	11	SCG2	47829.7	22.6282
26	C2	12	SCG2	48236.4	452.668
26	C2	13	SCG2	48168.9	408.527
26	C2	14	SCG2	47756.4	19.399
26	C2	15	SCG2	47560.5	-153.132
26	C2	16	SCG2	47554.4	-135.92
26	C2	17	SCG2	47796	129.119
26	C2	18	SCG2	47858.3	214.686
26	C2	19	SCG2	47820.6	200.429
26	C2	20	SCG2	47778.8	181.952
26	C2	21	SCG2	47328.1	-245.407
26	C2	22	SCG2	47237.9	-312.23
26	C2	23	SCG2	47346.4	-180.425
26	C2	24	SCG2	47330.9	-172.601
26	C2	25	SCG2	47372.9	-107.202
26	C2	26	SCG2	47778.4	321.685
26	C2	27	SCG2	48388	954.596
26	C2	28	SCG2	49213.5	1803.41
26	C2	29	SCG2	51041	3654.34
26	C2	30	SCG2	55244	7880.66
26	C2	31	SCG2	62970.2	15630.2
26	C2	32	SCG2	75749.7	28433.1
26	C2	33	SCG2	98503.3	51210
26	C2	34	SCG2	132950	85680.4
26	C2	35	SCG2	178379	131133
26	C2	36	SCG2	227756	180533
26	C2	37	SCG2	272114	224914
26	C2	38	SCG2	307622	260446
26	C2	39	SCG2	334985	287832
26	C2	40	SCG2	353377	306247
27	C3	1	SCG2	43377.2	-285.842
27	C3	2	SCG2	43636.1	-35.3646
27	C3	3	SCG2	43797.3	117.387
27	C3	4	SCG2	43492.5	-195.839
27	C3	5	SCG2	43320.6	-376.217
27	C3	6	SCG2	43440	-265.243
27	C3	7	SCG2	44060	346.372
27	C3	8	SCG2	43792.2	70.1268
27	C3	9	SCG2	43644.6	-85.9268
27	C3	10	SCG2	43738.3	-0.640422
27	C3	11	SCG2	43858.8	111.396
27	C3	12	SCG2	44117.5	361.678
27	C3	13	SCG2	44076.5	312.297
27	C3	14	SCG2	43958.1	185.384
27	C3	15	SCG2	43862.7	81.592
27	C3	16	SCG2	43803.4	13.8275
27	C3	17	SCG2	43789.3	-8.67521
27	C3	18	SCG2	43360.4	-446.061
27	C3	19	SCG2	43354.5	-460.302
27	C3	20	SCG2	43907.4	84.1291
27	C3	21	SCG2	43963.7	131.982
27	C3	22	SCG2	43862.9	22.733
27	C3	23	SCG2	43910.7	62.0974
27	C3	24	SCG2	44281.5	424.513
27	C3	25	SCG2	44475.8	610.408
27	C3	26	SCG2	44959.1	1085.19
27	C3	27	SCG2	46154.1	2271.75
27	C3	28	SCG2	48740.7	4850.01
27	C3	29	SCG2	53684	9784.82
27	C3	30	SCG2	61855.6	17948
27	C3	31	SCG2	76833.4	32917.3
27	C3	32	SCG2	101950	58025.2
27	C3	33	SCG2	139185	95251.9
27	C3	34	SCG2	183640	139699
27	C3	35	SCG2	227417	183467
27	C3	36	SCG2	264298	220340
27	C3	37	SCG2	295050	251083
27	C3	38	SCG2	319309	275334
27	C3	39	SCG2	337224	293241
27	C3	40	SCG2	348157	304165
28	C4	1	SCG2	43962.3	-426.522
28	C4	2	SCG2	43999.9	-466.77
28	C4	3	SCG2	44044.6	-499.822
28	C4	4	SCG2	44253.1	-369.191
28	C4	5	SCG2	44460.1	-239.912
28	C4	6	SCG2	44904.6	126.759
28	C4	7	SCG2	45137.8	282.128
28	C4	8	SCG2	45332.9	399.454
28	C4	9	SCG2	45279.6	268.398
28	C4	10	SCG2	45270.6	181.615
28	C4	11	SCG2	45370.6	203.774
28	C4	12	SCG2	45313	68.3578
28	C4	13	SCG2	45394.6	72.1569
28	C4	14	SCG2	45661.2	260.987
28	C4	15	SCG2	45648.3	170.275
28	C4	16	SCG2	45493.5	-62.2817
28	C4	17	SCG2	45303.4	-330.252
28	C4	18	SCG2	45179	-532.445
28	C4	19	SCG2	45209	-580.185
28	C4	20	SCG2	45466	-401.062
28	C4	21	SCG2	46019.5	74.6434
28	C4	22	SCG2	46636.6	613.943
28	C4	23	SCG2	47940.2	1839.78
28	C4	24	SCG2	49775	3596.74
28	C4	25	SCG2	54332.8	8076.74
28	C4	26	SCG2	62517.6	16183.8
28	C4	27	SCG2	76396.3	29984.7
28	C4	28	SCG2	99412.8	52923.4
28	C4	29	SCG2	134687	88120.1
28	C4	30	SCG2	180559	133914
28	C4	31	SCG2	229236	182514
28	C4	32	SCG2	271710	224909
28	C4	33	SCG2	305018	258140
28	C4	34	SCG2	329981	283025
28	C4	35	SCG2	348966	301932
28	C4	36	SCG2	362769	315658
28	C4	37	SCG2	372527	325337
28	C4	38	SCG2	379298	332031
28	C4	39	SCG2	384662	337316
28	C4	40	SCG2	387806	340383
29	C5	1	SCG2	40113.2	-420.031
29	C5	2	SCG2	40175.1	-296.054
29	C5	3	SCG2	40284.1	-124.986
29	C5	4	SCG2	40238.2	-108.903
29	C5	5	SCG2	40299.1	14.1095
29	C5	6	SCG2	40524.4	301.47
29	C5	7	SCG2	40479	318.115
29	C5	8	SCG2	40293.6	194.804
29	C5	9	SCG2	39890.3	-146.418
29	C5	10	SCG2	39837.5	-137.19
29	C5	11	SCG2	40049.1	136.491
29	C5	12	SCG2	39587	-263.516
29	C5	13	SCG2	39416.2	-372.218
29	C5	14	SCG2	39447	-279.397
29	C5	15	SCG2	39608.3	-56.0129
29	C5	16	SCG2	39652.2	49.9921
29	C5	17	SCG2	39778.9	238.739
29	C5	18	SCG2	39713	234.92
29	C5	19	SCG2	39760.8	344.773
29	C5	20	SCG2	40186.4	832.379
29	C5	21	SCG2	40206.4	914.497
29	C5	22	SCG2	40443.6	1213.8
29	C5	23	SCG2	41905.8	2737.98
29	C5	24	SCG2	43567.5	4461.81
29	C5	25	SCG2	47325.8	8282.17
29	C5	26	SCG2	53924.5	14942.9
29	C5	27	SCG2	66194.5	27275
29	C5	28	SCG2	87772.7	48915.3
29	C5	29	SCG2	120703	81907.2
29	C5	30	SCG2	164624	125890
29	C5	31	SCG2	212898	174227
29	C5	32	SCG2	256245	217636
29	C5	33	SCG2	290789	252242
29	C5	34	SCG2	316940	278455
29	C5	35	SCG2	336256	297833
29	C5	36	SCG2	349949	311588
29	C5	37	SCG2	360709	322410
29	C5	38	SCG2	368215	329979
29	C5	39	SCG2	373282	335107
29	C5	40	SCG2	376419	338306
30	C6	1	SCG2	39206.1	-142.694
30	C6	2	SCG2	39354.8	-48.3462
30	C6	3	SCG2	39421	-36.5765
30	C6	4	SCG2	39379.1	-132.893
30	C6	5	SCG2	39379.3	-187.1
30	C6	6	SCG2	39418.1	-202.678
30	C6	7	SCG2	39787.8	112.635
30	C6	8	SCG2	40079	349.373
30	C6	9	SCG2	40156.1	372.042
30	C6	10	SCG2	40170.2	331.815
30	C6	11	SCG2	39922.6	29.8074
30	C6	12	SCG2	39609.2	-337.985
30	C6	13	SCG2	39595.6	-406.087
30	C6	14	SCG2	39992.1	-63.8992
30	C6	15	SCG2	40103.5	-6.92636
30	C6	16	SCG2	40405.9	241.035
30	C6	17	SCG2	40319.1	99.8474
30	C6	18	SCG2	40193.4	-80.297
30	C6	19	SCG2	40246	-82.1133
30	C6	20	SCG2	40463.2	80.7658
30	C6	21	SCG2	40630.2	193.332
30	C6	22	SCG2	41745.4	1254.15
30	C6	23	SCG2	43750.9	3205.23
30	C6	24	SCG2	47421.7	6821.59
30	C6	25	SCG2	53814.5	13160
30	C6	26	SCG2	65718.4	25009.5
30	C6	27	SCG2	85662.9	44899.6
30	C6	28	SCG2	116624	75806.6
30	C6	29	SCG2	158829	117957
30	C6	30	SCG2	205153	164226
30	C6	31	SCG2	246812	205831
30	C6	32	SCG2	279340	238305
30	C6	33	SCG2	303999	262909
30	C6	34	SCG2	323545	282401
30	C6	35	SCG2	336559	295361
30	C6	36	SCG2	346029	304776
30	C6	37	SCG2	353112	311804
30	C6	38	SCG2	357591	316229
30	C6	39	SCG2	360372	318956
30	C6	40	SCG2	362219	320749
31	C7	1	SCG2	29357.4	-1593.81
31	C7	2	SCG2	29934.5	-1039.12
31	C7	3	SCG2	30261.7	-734.249
31	C7	4	SCG2	30817.9	-200.451
31	C7	5	SCG2	30956.1	-84.5813
31	C7	6	SCG2	31102.3	39.2808
31	C7	7	SCG2	31102.2	16.7132
31	C7	8	SCG2	31435.1	327.3
31	C7	9	SCG2	31571	440.853
31	C7	10	SCG2	31399.9	247.354
31	C7	11	SCG2	31232.8	57.8686
31	C7	12	SCG2	31249.7	52.3869
31	C7	13	SCG2	31337.2	117.478
31	C7	14	SCG2	31550.9	308.857
31	C7	15	SCG2	31683.7	419.317
31	C7	16	SCG2	31533.9	247.136
31	C7	17	SCG2	31265	-44.2089
31	C7	18	SCG2	30817.4	-514.165
31	C7	19	SCG2	30745.8	-608.063
31	C7	20	SCG2	31296.4	-79.898
31	C7	21	SCG2	31389.7	-8.92853
31	C7	22	SCG2	31364	-57.002
31	C7	23	SCG2	31796.2	352.844
31	C7	24	SCG2	31968.6	502.843
31	C7	25	SCG2	32473.8	985.676
31	C7	26	SCG2	33506	1995.51
31	C7	27	SCG2	35302.4	3769.51
31	C7	28	SCG2	37993.2	6437.94
31	C7	29	SCG2	43046.2	11468.6
31	C7	30	SCG2	52780.2	21180.2
31	C7	31	SCG2	70001	38378.6
31	C7	32	SCG2	98441.7	66797
31	C7	33	SCG2	139600	107933
31	C7	34	SCG2	189802	158112
31	C7	35	SCG2	239486	207774
31	C7	36	SCG2	280859	249125
31	C7	37	SCG2	312403	280646
31	C7	38	SCG2	336199	304420
31	C7	39	SCG2	353755	321954
31	C7	40	SCG2	365564	333740
32	C8	1	SCG2	53890.7	979.766
32	C8	2	SCG2	53557.2	735.406
32	C8	3	SCG2	52662.9	-69.9142
32	C8	4	SCG2	52305.2	-338.516
32	C8	5	SCG2	52294.7	-259.946
32	C8	6	SCG2	52742	276.347
32	C8	7	SCG2	52804.5	427.944
32	C8	8	SCG2	52652.6	365.045
32	C8	9	SCG2	52511.2	312.76
32	C8	10	SCG2	52347.9	238.447
32	C8	11	SCG2	51823.9	-196.51
32	C8	12	SCG2	51279.6	-651.776
32	C8	13	SCG2	51256.2	-586.05
32	C8	14	SCG2	51708.8	-44.3898
32	C8	15	SCG2	51841.3	177.165
32	C8	16	SCG2	51783.7	208.61
32	C8	17	SCG2	51609	122.941
32	C8	18	SCG2	51472.7	75.6248
32	C8	19	SCG2	51285.6	-22.3676
32	C8	20	SCG2	51183.5	-35.4148
32	C8	21	SCG2	51065.7	-64.2275
32	C8	22	SCG2	51176.5	135.694
32	C8	23	SCG2	51744.9	793.127
32	C8	24	SCG2	52018.6	1155.87
32	C8	25	SCG2	52693.1	1919.44
32	C8	26	SCG2	53626.9	2942.29
32	C8	27	SCG2	55046.3	4450.76
32	C8	28	SCG2	58407.2	7900.7
32	C8	29	SCG2	65054.5	14637
32	C8	30	SCG2	77119.7	26791.3
32	C8	31	SCG2	97697.5	47458.1
32	C8	32	SCG2	129575	79424.9
32	C8	33	SCG2	172705	122644
32	C8	34	SCG2	219630	169657
32	C8	35	SCG2	261262	211379
32	C8	36	SCG2	294222	244428
32	C8	37	SCG2	319643	269938
32	C8	38	SCG2	338660	289044
32	C8	39	SCG2	353076	303549
32	C8	40	SCG2	362869	313431
33	C9	1	SCG2	39938.9	-1702.43
33	C9	2	SCG2	40263.5	-1352.69
33	C9	3	SCG2	41214.4	-376.585
33	C9	4	SCG2	41288.4	-277.336
33	C9	5	SCG2	41284.6	-255.965
33	C9	6	SCG2	41765.1	249.726
33	C9	7	SCG2	41890.7	400.526
33	C9	8	SCG2	41781.8	316.861
33	C9	9	SCG2	41717.9	278.153
33	C9	10	SCG2	41397.5	-17.035
33	C9	11	SCG2	41309.5	-79.7974
33	C9	12	SCG2	41606.1	241.952
33	C9	13	SCG2	41378.3	39.3965
33	C9	14	SCG2	41186.9	-126.862
33	C9	15	SCG2	41125.6	-162.917
33	C9	16	SCG2	41163.9	-99.4258
33	C9	17	SCG2	41359.6	121.468
33	C9	18	SCG2	41061.2	-151.736
33	C9	19	SCG2	40956.2	-231.569
33	C9	20	SCG2	41228.7	66.1652
33	C9	21	SCG2	41202.3	64.9809
33	C9	22	SCG2	41281.3	169.222
33	C9	23	SCG2	41629	542.065
33	C9	24	SCG2	41786.6	724.909
33	C9	25	SCG2	42426.7	1390.19
33	C9	26	SCG2	43340.1	2328.84
33	C9	27	SCG2	45620.2	4634.1
33	C9	28	SCG2	49360.7	8399.84
33	C9	29	SCG2	56310	15374.3
33	C9	30	SCG2	69237.9	28327.4
33	C9	31	SCG2	91467.4	50582.1
33	C9	32	SCG2	125731	84870.7
33	C9	33	SCG2	171308	130473
33	C9	34	SCG2	218923	178114
33	C9	35	SCG2	261255	220470
33	C9	36	SCG2	297565	256805
33	C9	37	SCG2	327112	286378
33	C9	38	SCG2	349501	308792
33	C9	39	SCG2	365483	324799
33	C9	40	SCG2	374868	334209
34	C10	1	ACTIN	37470.6	-92.5231
34	C10	2	ACTIN	37778.1	-210.194
34	C10	3	ACTIN	38364.1	-49.2941
34	C10	4	ACTIN	39005.4	166.828
34	C10	5	ACTIN	39133.5	-130.206
34	C10	6	ACTIN	39619.6	-69.2631
34	C10	7	ACTIN	40222.3	108.301
34	C10	8	ACTIN	40512.7	-26.3661
34	C10	9	ACTIN	40670.7	-293.525
34	C10	10	ACTIN	41752.7	363.297
34	C10	11	ACTIN	42568	753.52
34	C10	12	ACTIN	44217.7	1978.09
34	C10	13	ACTIN	47517.5	4852.74
34	C10	14	ACTIN	53722.6	10632.7
34	C10	15	ACTIN	65065.1	21550
34	C10	16	ACTIN	85241.1	41300.8
34	C10	17	ACTIN	117736	73370.8
34	C10	18	ACTIN	165400	120610
34	C10	19	ACTIN	222563	177347
34	C10	20	ACTIN	278942	233301
34	C10	21	ACTIN	323565	277499
34	C10	22	ACTIN	354315	307824
34	C10	23	ACTIN	375085	328168
34	C10	24	ACTIN	389365	342023
34	C10	25	ACTIN	400096	352329
34	C10	26	ACTIN	407876	359685
34	C10	27	ACTIN	413849	365232
34	C10	28	ACTIN	417901	368859
34	C10	29	ACTIN	420630	371163
34	C10	30	ACTIN	422778	372886
34	C10	31	ACTIN	423823	373506
34	C10	32	ACTIN	424218	373476
34	C10	33	ACTIN	424285	373118
34	C10	34	ACTIN	423926	372333
34	C10	35	ACTIN	423490	371472
34	C10	36	ACTIN	422808	370365
34	C10	37	ACTIN	422004	369136
34	C10	38	ACTIN	421485	368191
34	C10	39	ACTIN	421377	367659
34	C10	40	ACTIN	420447	366304
35	C11	1	ACTIN	36396.6	-1037.01
35	C11	2	ACTIN	36940	-669.94
35	C11	3	ACTIN	37548.6	-237.692
35	C11	4	ACTIN	38069.9	107.318
35	C11	5	ACTIN	38235.7	96.77
35	C11	6	ACTIN	38327	11.6981
35	C11	7	ACTIN	38717.3	225.7
35	C11	8	ACTIN	38683.9	15.9841
35	C11	9	ACTIN	38624.5	-219.779
35	C11	10	ACTIN	39058.8	38.1529
35	C11	11	ACTIN	39912.5	715.577
35	C11	12	ACTIN	41680.3	2307.05
35	C11	13	ACTIN	45215.9	5666.29
35	C11	14	ACTIN	50747.1	11021.2
35	C11	15	ACTIN	61251.9	21349.7
35	C11	16	ACTIN	80181.2	40102.7
35	C11	17	ACTIN	111247	70992.1
35	C11	18	ACTIN	156135	115704
35	C11	19	ACTIN	212221	171613
35	C11	20	ACTIN	267787	227003
35	C11	21	ACTIN	313478	272518
35	C11	22	ACTIN	345225	304089
35	C11	23	ACTIN	366904	325591
35	C11	24	ACTIN	381255	339766
35	C11	25	ACTIN	392480	350815
35	C11	26	ACTIN	400451	358609
35	C11	27	ACTIN	406598	364580
35	C11	28	ACTIN	410751	368556
35	C11	29	ACTIN	413855	371484
35	C11	30	ACTIN	416109	373562
35	C11	31	ACTIN	416951	374228
35	C11	32	ACTIN	417664	374764
35	C11	33	ACTIN	417165	374089
35	C11	34	ACTIN	416499	373247
35	C11	35	ACTIN	416465	373036
35	C11	36	ACTIN	416414	372808
35	C11	37	ACTIN	415813	372031
35	C11	38	ACTIN	415551	371593
35	C11	39	ACTIN	414924	370790
35	C11	40	ACTIN	414246	369935
36	C12	1	ACTIN	36532.9	-54.5667
36	C12	2	ACTIN	36715.7	-113.757
36	C12	3	ACTIN	36933.8	-137.654
36	C12	4	ACTIN	37143.7	-169.777
36	C12	5	ACTIN	37618	62.5014
36	C12	6	ACTIN	38068.8	271.335
36	C12	7	ACTIN	38351	311.574
36	C12	8	ACTIN	38269.1	-12.3499
36	C12	9	ACTIN	38197.8	-325.63
36	C12	10	ACTIN	38682.2	-83.3198
36	C12	11	ACTIN	39840.9	833.428
36	C12	12	ACTIN	41055.8	1806.34
36	C12	13	ACTIN	42836	3344.5
36	C12	14	ACTIN	46354.8	6621.36
36	C12	15	ACTIN	53898.5	13923.1
36	C12	16	ACTIN	66237.1	26019.6
36	C12	17	ACTIN	88137.1	47677.6
36	C12	18	ACTIN	124087	83385.2
36	C12	19	ACTIN	173809	132865
36	C12	20	ACTIN	232759	191574
36	C12	21	ACTIN	288595	247167
36	C12	22	ACTIN	331875	290206
36	C12	23	ACTIN	361987	320076
36	C12	24	ACTIN	382221	340068
36	C12	25	ACTIN	396370	353974
36	C12	26	ACTIN	407542	364905
36	C12	27	ACTIN	415427	372548
36	C12	28	ACTIN	420917	377795
36	C12	29	ACTIN	425439	382075
36	C12	30	ACTIN	428303	384698
36	C12	31	ACTIN	430596	386748
36	C12	32	ACTIN	431373	387284
36	C12	33	ACTIN	431364	387032
36	C12	34	ACTIN	431115	386541
36	C12	35	ACTIN	430717	385901
36	C12	36	ACTIN	430579	385521
36	C12	37	ACTIN	430064	384764
36	C12	38	ACTIN	429324	383783
36	C12	39	ACTIN	428660	382876
36	C12	40	ACTIN	428697	382672
37	D1	1	COL5A2	31001.6	269.372
37	D1	2	COL5A2	30815.2	120.442
37	D1	3	COL5A2	30761.4	104.136
37	D1	4	COL5A2	31082	462.244
37	D1	5	COL5A2	30811.3	229.126
37	D1	6	COL5A2	30583.8	39.0609
37	D1	7	COL5A2	30483.1	-24.1139
37	D1	8	COL5A2	30425.5	-44.1792
37	D1	9	COL5A2	30297.7	-134.532
37	D1	10	COL5A2	30014.7	-379.935
37	D1	11	COL5A2	29965.4	-391.78
37	D1	12	COL5A2	30049.8	-269.908
37	D1	13	COL5A2	30067.7	-214.506
37	D1	14	COL5A2	30147.3	-97.3176
37	D1	15	COL5A2	30148.4	-58.7619
37	D1	16	COL5A2	30152.5	-17.1339
37	D1	17	COL5A2	30300.5	168.328
37	D1	18	COL5A2	30307.3	212.7
37	D1	19	COL5A2	30307.4	250.303
37	D1	20	COL5A2	30123.6	103.97
37	D1	21	COL5A2	30031.9	49.8439
37	D1	22	COL5A2	29957.1	12.4543
37	D1	23	COL5A2	30003.4	96.26
37	D1	24	COL5A2	30444.4	574.843
37	D1	25	COL5A2	31253.2	1421.09
37	D1	26	COL5A2	31976.6	2182.04
37	D1	27	COL5A2	34393	4635.98
37	D1	28	COL5A2	38809.4	9089.82
37	D1	29	COL5A2	46840.4	17158.3
37	D1	30	COL5A2	60711.7	31067.1
37	D1	31	COL5A2	84903.9	55296.9
37	D1	32	COL5A2	121457	91887.7
37	D1	33	COL5A2	166010	136478
37	D1	34	COL5A2	208728	179234
37	D1	35	COL5A2	244528	215071
37	D1	36	COL5A2	274150	244730
37	D1	37	COL5A2	298299	268917
37	D1	38	COL5A2	316132	286787
37	D1	39	COL5A2	328373	299066
37	D1	40	COL5A2	336693	307423
38	D2	1	COL5A2	29822.3	-189.757
38	D2	2	COL5A2	29816	-180.601
38	D2	3	COL5A2	29548.5	-432.608
38	D2	4	COL5A2	29542.7	-422.963
38	D2	5	COL5A2	29968.1	17.93
38	D2	6	COL5A2	30025.8	91.0906
38	D2	7	COL5A2	29884.8	-34.5379
38	D2	8	COL5A2	29845.6	-58.2484
38	D2	9	COL5A2	30091.9	203.479
38	D2	10	COL5A2	30235.1	362.149
38	D2	11	COL5A2	30313.8	456.306
38	D2	12	COL5A2	30330	487.962
38	D2	13	COL5A2	29949.8	123.26
38	D2	14	COL5A2	29774.1	-37.0681
38	D2	15	COL5A2	29741.6	-54.0443
38	D2	16	COL5A2	29854	73.7999
38	D2	17	COL5A2	29899.9	135.175
38	D2	18	COL5A2	29445.4	-303.936
38	D2	19	COL5A2	29126.1	-607.746
38	D2	20	COL5A2	29147.8	-570.616
38	D2	21	COL5A2	29591.5	-111.481
38	D2	22	COL5A2	30190.8	503.269
38	D2	23	COL5A2	30249.6	577.569
38	D2	24	COL5A2	30455.4	798.762
38	D2	25	COL5A2	31168.2	1527.1
38	D2	26	COL5A2	31465.8	1840.1
38	D2	27	COL5A2	32030.6	2420.37
38	D2	28	COL5A2	33614.1	4019.34
38	D2	29	COL5A2	36812.3	7232.98
38	D2	30	COL5A2	43175.8	13611.9
38	D2	31	COL5A2	54846.8	25298.4
38	D2	32	COL5A2	74516.4	44983.5
38	D2	33	COL5A2	106286	76768.7
38	D2	34	COL5A2	148826	119324
38	D2	35	COL5A2	192871	163384
38	D2	36	COL5A2	231573	202102
38	D2	37	COL5A2	266113	236657
38	D2	38	COL5A2	294349	264908
38	D2	39	COL5A2	314264	284839
38	D2	40	COL5A2	326046	296637
39	D3	1	COL5A2	19618.8	78.2937
39	D3	2	COL5A2	19688.1	131.939
39	D3	3	COL5A2	19718.8	146.866
39	D3	4	COL5A2	19342.1	-245.514
39	D3	5	COL5A2	19336.5	-266.809
39	D3	6	COL5A2	19710.5	91.4124
39	D3	7	COL5A2	19766.1	131.329
39	D3	8	COL5A2	19764.4	113.922
39	D3	9	COL5A2	19526.3	-139.914
39	D3	10	COL5A2	19459.4	-222.605
39	D3	11	COL5A2	19679.9	-17.7444
39	D3	12	COL5A2	20114.5	401.134
39	D3	13	COL5A2	20088.8	359.728
39	D3	14	COL5A2	19913.8	168.978
39	D3	15	COL5A2	19585.7	-174.83
39	D3	16	COL5A2	19545.9	-230.344
39	D3	17	COL5A2	19821.1	29.139
39	D3	18	COL5A2	19822.5	14.7847
39	D3	19	COL5A2	19765.3	-58.1791
39	D3	20	COL5A2	19737.8	-101.354
39	D3	21	COL5A2	19854.1	-0.75314
39	D3	22	COL5A2	20286.2	415.543
39	D3	23	COL5A2	20519.9	633.571
39	D3	24	COL5A2	20890.1	988.076
39	D3	25	COL5A2	21174.3	1256.49
39	D3	26	COL5A2	21687.5	1753.96
39	D3	27	COL5A2	22884.1	2934.87
39	D3	28	COL5A2	25782.8	5817.84
39	D3	29	COL5A2	30698.8	10718.2
39	D3	30	COL5A2	39325.7	19329.3
39	D3	31	COL5A2	55282.2	35270.1
39	D3	32	COL5A2	82242.3	62214.5
39	D3	33	COL5A2	121835	101791
39	D3	34	COL5A2	169854	149795
39	D3	35	COL5A2	215738	195663
39	D3	36	COL5A2	253310	233219
39	D3	37	COL5A2	284993	264886
39	D3	38	COL5A2	310183	290061
39	D3	39	COL5A2	327976	307838
39	D3	40	COL5A2	339768	319614
40	D4	1	COL5A2	26697.8	-269.225
40	D4	2	COL5A2	27126.6	-62.7993
40	D4	3	COL5A2	27476.5	64.8251
40	D4	4	COL5A2	27515.8	-118.16
40	D4	5	COL5A2	27853.4	-2.79902
40	D4	6	COL5A2	27943.9	-134.583
40	D4	7	COL5A2	28315	14.237
40	D4	8	COL5A2	28780.3	257.176
40	D4	9	COL5A2	28812.8	67.4292
40	D4	10	COL5A2	29002.5	34.8916
40	D4	11	COL5A2	29006.9	-183.017
40	D4	12	COL5A2	29352.1	-60.1252
40	D4	13	COL5A2	29681.2	46.6516
40	D4	14	COL5A2	30044.7	187.928
40	D4	15	COL5A2	30588.3	509.225
40	D4	16	COL5A2	31520.8	1219.4
40	D4	17	COL5A2	33419.4	2895.71
40	D4	18	COL5A2	36977.8	6231.87
40	D4	19	COL5A2	42960.7	11992.4
40	D4	20	COL5A2	54210.8	23020.2
40	D4	21	COL5A2	74186.4	42773.6
40	D4	22	COL5A2	106601	74966.1
40	D4	23	COL5A2	151586	119729
40	D4	24	COL5A2	201793	169713
40	D4	25	COL5A2	246275	213973
40	D4	26	COL5A2	281236	248712
40	D4	27	COL5A2	309900	277153
40	D4	28	COL5A2	331242	298273
40	D4	29	COL5A2	347130	313939
40	D4	30	COL5A2	358595	325182
40	D4	31	COL5A2	367653	334017
40	D4	32	COL5A2	373683	339825
40	D4	33	COL5A2	378395	344315
40	D4	34	COL5A2	382470	348167
40	D4	35	COL5A2	385796	351271
40	D4	36	COL5A2	388598	353851
40	D4	37	COL5A2	390729	355760
40	D4	38	COL5A2	392157	356966
40	D4	39	COL5A2	393053	357639
40	D4	40	COL5A2	393443	357807
41	D5	1	COL5A2	27340.9	377.583
41	D5	2	COL5A2	27339.5	323.739
41	D5	3	COL5A2	26948.3	-119.999
41	D5	4	COL5A2	26989.6	-131.128
41	D5	5	COL5A2	27508.6	335.433
41	D5	6	COL5A2	27369.5	143.874
41	D5	7	COL5A2	27299.8	21.7204
41	D5	8	COL5A2	27474.3	143.769
41	D5	9	COL5A2	27446.1	63.17
41	D5	10	COL5A2	27363.5	-71.8865
41	D5	11	COL5A2	27274	-213.89
41	D5	12	COL5A2	27166.5	-373.806
41	D5	13	COL5A2	27204.5	-388.245
41	D5	14	COL5A2	27670.4	25.206
41	D5	15	COL5A2	28025.1	327.505
41	D5	16	COL5A2	27988.4	238.277
41	D5	17	COL5A2	28203.8	401.228
41	D5	18	COL5A2	29641.1	1786.1
41	D5	19	COL5A2	31514.9	3607.41
41	D5	20	COL5A2	35082	7122.11
41	D5	21	COL5A2	41926.5	13914.2
41	D5	22	COL5A2	55261.9	27197.1
41	D5	23	COL5A2	77648	49530.8
41	D5	24	COL5A2	112894	84724.6
41	D5	25	COL5A2	158985	130763
41	D5	26	COL5A2	206673	178398
41	D5	27	COL5A2	247243	218916
41	D5	28	COL5A2	280048	251668
41	D5	29	COL5A2	306784	278352
41	D5	30	COL5A2	326782	298298
41	D5	31	COL5A2	341781	313245
41	D5	32	COL5A2	352978	324388
41	D5	33	COL5A2	360298	331657
41	D5	34	COL5A2	366251	337557
41	D5	35	COL5A2	370864	342118
41	D5	36	COL5A2	374834	346035
41	D5	37	COL5A2	378148	349297
41	D5	38	COL5A2	380488	351585
41	D5	39	COL5A2	381892	352936
41	D5	40	COL5A2	383227	354218
42	D6	1	COL5A2	19671.9	-732.647
42	D6	2	COL5A2	19991.7	-581.636
42	D6	3	COL5A2	20327.8	-414.437
42	D6	4	COL5A2	21038.5	127.423
42	D6	5	COL5A2	21244	164.066
42	D6	6	COL5A2	21557.7	308.873
42	D6	7	COL5A2	21527.2	109.557
42	D6	8	COL5A2	21497.8	-88.657
42	D6	9	COL5A2	21507.2	-248.106
42	D6	10	COL5A2	22005.7	81.4944
42	D6	11	COL5A2	22190.1	97.0124
42	D6	12	COL5A2	22124.7	-137.227
42	D6	13	COL5A2	22351.2	-79.596
42	D6	14	COL5A2	22824.8	225.209
42	D6	15	COL5A2	23331.7	563.229
42	D6	16	COL5A2	24012	1074.65
42	D6	17	COL5A2	25565.9	2459.68
42	D6	18	COL5A2	28520.9	5245.9
42	D6	19	COL5A2	33798.1	10354.2
42	D6	20	COL5A2	44123.4	20510.6
42	D6	21	COL5A2	61997	38215.4
42	D6	22	COL5A2	92212	68261.6
42	D6	23	COL5A2	135084	110964
42	D6	24	COL5A2	185164	160876
42	D6	25	COL5A2	232402	207945
42	D6	26	COL5A2	270386	245760
42	D6	27	COL5A2	300371	275577
42	D6	28	COL5A2	323483	298519
42	D6	29	COL5A2	340868	315736
42	D6	30	COL5A2	353102	327800
42	D6	31	COL5A2	362532	337062
42	D6	32	COL5A2	369114	343475
42	D6	33	COL5A2	374003	348195
42	D6	34	COL5A2	378341	352364
42	D6	35	COL5A2	381598	355452
42	D6	36	COL5A2	383829	357515
42	D6	37	COL5A2	385964	359481
42	D6	38	COL5A2	387996	361344
42	D6	39	COL5A2	389157	362336
42	D6	40	COL5A2	389876	362886
43	D7	1	COL5A2	22528.7	-1119.05
43	D7	2	COL5A2	22899.8	-888.353
43	D7	3	COL5A2	23708.5	-220.105
43	D7	4	COL5A2	23831.9	-237.188
43	D7	5	COL5A2	23820.4	-389.157
43	D7	6	COL5A2	24274.8	-75.2127
43	D7	7	COL5A2	24730.4	239.872
43	D7	8	COL5A2	25085.7	454.691
43	D7	9	COL5A2	24994	222.586
43	D7	10	COL5A2	24929.9	18.0256
43	D7	11	COL5A2	25251.6	199.282
43	D7	12	COL5A2	25514.2	321.335
43	D7	13	COL5A2	25498.1	164.822
43	D7	14	COL5A2	25432.9	-40.8572
43	D7	15	COL5A2	25490	-124.267
43	D7	16	COL5A2	25483.1	-271.634
43	D7	17	COL5A2	25904	8.85912
43	D7	18	COL5A2	25938.9	-96.6834
43	D7	19	COL5A2	26001.7	-174.368
43	D7	20	COL5A2	26197	-119.516
43	D7	21	COL5A2	26450.4	-6.61352
43	D7	22	COL5A2	27340.8	743.295
43	D7	23	COL5A2	27735.1	997.094
43	D7	24	COL5A2	28922.9	2044.44
43	D7	25	COL5A2	31140.8	4121.9
43	D7	26	COL5A2	35227.1	8067.78
43	D7	27	COL5A2	42842.5	15542.7
43	D7	28	COL5A2	56472.5	29032.2
43	D7	29	COL5A2	80537.9	52957.1
43	D7	30	COL5A2	118664	90943
43	D7	31	COL5A2	169879	142017
43	D7	32	COL5A2	224567	196565
43	D7	33	COL5A2	271993	243850
43	D7	34	COL5A2	310302	282019
43	D7	35	COL5A2	341632	313209
43	D7	36	COL5A2	364502	335938
43	D7	37	COL5A2	382100	353395
43	D7	38	COL5A2	394360	365515
43	D7	39	COL5A2	403218	374232
43	D7	40	COL5A2	409705	380579
44	D8	1	COL5A2	18652.9	-835.834
44	D8	2	COL5A2	18844.3	-745.876
44	D8	3	COL5A2	19328.2	-363.482
44	D8	4	COL5A2	19520	-273.18
44	D8	5	COL5A2	19804	-90.6831
44	D8	6	COL5A2	19939.9	-56.1938
44	D8	7	COL5A2	20209.8	112.153
44	D8	8	COL5A2	20464.5	265.461
44	D8	9	COL5A2	20496.5	195.938
44	D8	10	COL5A2	20847.4	445.354
44	D8	11	COL5A2	20893.5	390.003
44	D8	12	COL5A2	20675.1	70.0803
44	D8	13	COL5A2	20536.3	-170.18
44	D8	14	COL5A2	20712.9	-95.0406
44	D8	15	COL5A2	21036.5	127.041
44	D8	16	COL5A2	20905.5	-105.458
44	D8	17	COL5A2	20819.5	-292.936
44	D8	18	COL5A2	21145	-68.8351
44	D8	19	COL5A2	21254	-61.3887
44	D8	20	COL5A2	21388.2	-28.6513
44	D8	21	COL5A2	21664.7	146.344
44	D8	22	COL5A2	21968.2	348.39
44	D8	23	COL5A2	22522.2	800.914
44	D8	24	COL5A2	24020.6	2197.81
44	D8	25	COL5A2	25867.6	3943.33
44	D8	26	COL5A2	29231.6	7205.92
44	D8	27	COL5A2	35828	13700.8
44	D8	28	COL5A2	48059.4	25830.7
44	D8	29	COL5A2	69081.3	46751.2
44	D8	30	COL5A2	103445	81013.3
44	D8	31	COL5A2	150567	128034
44	D8	32	COL5A2	201830	179196
44	D8	33	COL5A2	247500	224764
44	D8	34	COL5A2	285429	262592
44	D8	35	COL5A2	315469	292530
44	D8	36	COL5A2	338739	315698
44	D8	37	COL5A2	355289	332147
44	D8	38	COL5A2	367710	344467
44	D8	39	COL5A2	376927	353582
44	D8	40	COL5A2	382771	359325
45	D9	1	COL5A2	22589.1	-959.875
45	D9	2	COL5A2	22788	-844.834
45	D9	3	COL5A2	23623.9	-92.8445
45	D9	4	COL5A2	23790	-10.5246
45	D9	5	COL5A2	23770.2	-114.222
45	D9	6	COL5A2	23828.7	-139.551
45	D9	7	COL5A2	24018.9	-33.2621
45	D9	8	COL5A2	24175.6	39.6242
45	D9	9	COL5A2	24179.4	-40.4231
45	D9	10	COL5A2	24501.2	197.446
45	D9	11	COL5A2	24660.5	272.906
45	D9	12	COL5A2	24573	101.546
45	D9	13	COL5A2	24532.4	-22.954
45	D9	14	COL5A2	24748.2	109.028
45	D9	15	COL5A2	24929.7	206.655
45	D9	16	COL5A2	24888.7	81.8455
45	D9	17	COL5A2	24719.5	-171.225
45	D9	18	COL5A2	24590.6	-384.044
45	D9	19	COL5A2	24701.2	-357.238
45	D9	20	COL5A2	24930.4	-211.994
45	D9	21	COL5A2	25401.5	175.285
45	D9	22	COL5A2	25701.1	391.015
45	D9	23	COL5A2	26121.4	727.515
45	D9	24	COL5A2	26904.5	1426.73
45	D9	25	COL5A2	28003.5	2441.87
45	D9	26	COL5A2	30290	4644.51
45	D9	27	COL5A2	34276.9	8547.53
45	D9	28	COL5A2	42142.2	16329
45	D9	29	COL5A2	57035.1	31138
45	D9	30	COL5A2	82527.3	56546.3
45	D9	31	COL5A2	123079	97014.2
45	D9	32	COL5A2	178011	151862
45	D9	33	COL5A2	236980	210747
45	D9	34	COL5A2	288381	262064
45	D9	35	COL5A2	329359	302959
45	D9	36	COL5A2	362433	335949
45	D9	37	COL5A2	387716	361148
45	D9	38	COL5A2	405497	378845
45	D9	39	COL5A2	418522	391787
45	D9	40	COL5A2	426515	399695
46	D10	1
46	D10	2
46	D10	3
46	D10	4
46	D10	5
46	D10	6
46	D10	7
46	D10	8
46	D10	9
46	D10	10
46	D10	11
46	D10	12
46	D10	13
46	D10	14
46	D10	15
46	D10	16
46	D10	17
46	D10	18
46	D10	19
46	D10	20
46	D10	21
46	D10	22
46	D10	23
46	D10	24
46	D10	25
46	D10	26
46	D10	27
46	D10	28
46	D10	29
46	D10	30
46	D10	31
46	D10	32
46	D10	33
46	D10	34
46	D10	35
46	D10	36
46	D10	37
46	D10	38
46	D10	39
46	D10	40
47	D11	1
47	D11	2
47	D11	3
47	D11	4
47	D11	5
47	D11	6
47	D11	7
47	D11	8
47	D11	9
47	D11	10
47	D11	11
47	D11	12
47	D11	13
47	D11	14
47	D11	15
47	D11	16
47	D11	17
47	D11	18
47	D11	19
47	D11	20
47	D11	21
47	D11	22
47	D11	23
47	D11	24
47	D11	25
47	D11	26
47	D11	27
47	D11	28
47	D11	29
47	D11	30
47	D11	31
47	D11	32
47	D11	33
47	D11	34
47	D11	35
47	D11	36
47	D11	37
47	D11	38
47	D11	39
47	D11	40
48	D12	1
48	D12	2
48	D12	3
48	D12	4
48	D12	5
48	D12	6
48	D12	7
48	D12	8
48	D12	9
48	D12	10
48	D12	11
48	D12	12
48	D12	13
48	D12	14
48	D12	15
48	D12	16
48	D12	17
48	D12	18
48	D12	19
48	D12	20
48	D12	21
48	D12	22
48	D12	23
48	D12	24
48	D12	25
48	D12	26
48	D12	27
48	D12	28
48	D12	29
48	D12	30
48	D12	31
48	D12	32
48	D12	33
48	D12	34
48	D12	35
48	D12	36
48	D12	37
48	D12	38
48	D12	39
48	D12	40
49	E1	1	COL5A2	22952.2	-349.494
49	E1	2	COL5A2	22931.5	-316.534
49	E1	3	COL5A2	23267.8	73.4783
49	E1	4	COL5A2	23671.8	531.114
49	E1	5	COL5A2	23535.2	448.195
49	E1	6	COL5A2	23388.1	354.732
49	E1	7	COL5A2	23290.9	311.268
49	E1	8	COL5A2	22805.7	-120.28
49	E1	9	COL5A2	22622.8	-249.547
49	E1	10	COL5A2	22641.9	-176.748
49	E1	11	COL5A2	22446.9	-318.13
49	E1	12	COL5A2	21868.1	-843.199
49	E1	13	COL5A2	21787.1	-870.527
49	E1	14	COL5A2	22133.7	-470.298
49	E1	15	COL5A2	22581.7	31.3808
49	E1	16	COL5A2	22503.3	6.62558
49	E1	17	COL5A2	22214.1	-228.839
49	E1	18	COL5A2	22211.8	-177.473
49	E1	19	COL5A2	22722.3	386.645
49	E1	20	COL5A2	23062.5	780.492
49	E1	21	COL5A2	22759.4	531.109
49	E1	22	COL5A2	22672.3	497.631
49	E1	23	COL5A2	22955.7	834.759
49	E1	24	COL5A2	23364.8	1297.48
49	E1	25	COL5A2	25079.4	3065.71
49	E1	26	COL5A2	26208	4247.97
49	E1	27	COL5A2	29117.9	7211.57
49	E1	28	COL5A2	33598.6	11746
49	E1	29	COL5A2	43380.1	21581.1
49	E1	30	COL5A2	61330.7	39585.4
49	E1	31	COL5A2	90430.7	68739
49	E1	32	COL5A2	131648	110010
49	E1	33	COL5A2	180651	159066
[truncated: 1,887 more rows]

## Sheet: Result analysis
Instrument Name	2765220071247
Instrument Mode	QuantStudio™ 5 System
Serial Number	2765220071247
Signal Smoothing	true
Creation Date	2024-08-04 17:58:45 afternoon CST
Heating Module Type	96-Well 0.2-mL Block
Reference Fluorescence
Analysis at a specific stage/cycle	stage2, step2
Experiment Name	2024-08-04_T24
Experiment File Name	D:\ZZH\2024-08-04_T24.eds
Experiment Barcode
Experiment Annotation
Experiment Type	Quantitative-Comparison
Experiment End Time	2024-08-04 17:42:18 afternoon CST
Calibration Background Expired	No
Calibration Background Perform	09-28-2022
Calibration Pure Dye ABY Expired	No
Calibration Pure Dye ABY Perform	09-28-2022
Calibration Pure Dye CY5 Expired	No
Calibration Pure Dye CY5 Perform	09-28-2022
Calibration Pure Dye FAM Expired	No
Calibration Pure Dye FAM Perform	09-28-2022
Calibration Pure Dye JUN Expired	No
Calibration Pure Dye JUN Perform	09-28-2022
Calibration Pure Dye MUSTANG PURPLE Expired	No
Calibration Pure Dye MUSTANG PURPLE Perform	09-28-2022
Calibration Pure Dye NED Expired	No
Calibration Pure Dye NED Perform	09-28-2022
Calibration Pure Dye ROX Expired	No
Calibration Pure Dye ROX Perform	09-28-2022
Calibration Pure Dye SYBR Expired	No
Calibration Pure Dye SYBR Perform	09-28-2022
Calibration Pure Dye TAMRA Expired	No
Calibration Pure Dye TAMRA 执行	09-28-2022
Calibration Pure Dye VIC Expired	No
Calibration Pure Dye VIC Perform	09-28-2022
Calibration ROI Expired	No
Calibration ROI Perform	09-28-2022
Calibration Uniformity Expired	No
Calibration Uniformity Perform	09-28-2022
Melt Curve Stage	Stage3
Username
Reagent	SYBR_GREEN
Post-read Stage/Step
Quantification Cycle Method	Ct
Pre-read Stage/Step Number
Reaction Well	Reaction Well Position	Ignore	Sample Name	Gene Name	Task	Reporter Group	Quencher Group	Number	Mean Quantity	Number SD	RQ	RQ Minimum Value	RQ Maximum Value	Cт	Cт Average Value	Cт SD	ΔCt	ΔCt Average Value	ΔCt SD	ΔCt SE	ΔΔCt	Automatic Ct Threshold	Ct Threshold	Automatic Baseline	Baseline Start Point	Baseline End Point	Amplification Status	Annotation	Cq set	OUTLIERRG	HIGHSD	Tm1	Tm2	Tm3	Tm4
1	A1	FALSE	SV-1	SCG2	UNKNOWN	SYBR	None				1	0.650535	1.5372	31.6656	31.3644	0.348852		15.08	0.386967	0.223416	0	TRUE	34020.6	TRUE	3	20	Amp		0.989121	N	N	81.9472
2	A2	FALSE	SV-2	SCG2	UNKNOWN	SYBR	None				0.797272	0.426165	1.49154	31.4736	31.7842	0.418677		15.4069	0.563737	0.325474	0.326856	TRUE	34020.6	TRUE	3	21	Amp		0.98872	N	N	82.0945
3	A3	FALSE	SV-3	SCG2	UNKNOWN	SYBR	None				1.46703	1.15456	1.86406	30.9563	31.0076	0.0525657		14.5271	0.215569	0.124459	-0.552897	TRUE	34020.6	TRUE	3	20	Amp		0.989509	N	N	81.9184
4	A4	FALSE	T24-1	SCG2	UNKNOWN	SYBR	None				8.69076	6.93406	10.8925	27.1463	27.1855	0.0373521		11.9606	0.203235	0.117338	-3.11948	TRUE	34020.6	TRUE	3	20	Amp		0.982322	N	N	81.9184
5	A5	FALSE	T24-2	SCG2	UNKNOWN	SYBR	None				21.5337	18.5352	25.0173	27.2265	27.3003	0.0639164		10.6515	0.134955	0.0779163	-4.42852	TRUE	34020.6	TRUE	3	15	Amp		0.975746	N	N	82.0993
6	A6	FALSE	T24-3	SCG2	UNKNOWN	SYBR	None				18.1318	16.3591	20.0966	26.5375	26.5452	0.0504076		10.8996	0.0925967	0.0534607	-4.18045	TRUE	34020.6	TRUE	3	16	Amp		0.985051	N	N	82.0993
7	A7	FALSE	SW1710-1	SCG2	UNKNOWN	SYBR	None				1.4882	0.994362	2.2273	30.4621	30.5254	0.232888		14.5065	0.362902	0.209521	-0.573568	TRUE	34020.6	TRUE	3	21	Amp		0.985461	N	N	82.2243
8	A8	FALSE	SW1710-2	SCG2	UNKNOWN	SYBR	None				1.37531	1.00594	1.88031	29.9846	30.2639	0.24232		14.6203	0.281484	0.162515	-0.459755	TRUE	34020.6	TRUE	3	21	Amp		0.986386	N	N	82.0771
9	A9	FALSE	SW1710-3	SCG2	UNKNOWN	SYBR	None				2.86124	1.87553	4.365	29.9809	30.2822	0.301311		13.5634	0.380131	0.219469	-1.51664	TRUE	34020.6	TRUE	3	20	Amp		0.980618	N	N	82.2506
10	A10	FALSE	T24-1	ACTIN	UNKNOWN	SYBR	None							15.3405	15.2249	0.199774						TRUE	34770.3	TRUE	3	8	Inconclusive		0.984045	N	N	85.9343
11	A11	FALSE	T24-2	ACTIN	UNKNOWN	SYBR	None							16.5605	16.6487	0.118859						TRUE	34770.3	TRUE	3	10	Inconclusive		0.978223	N	N	85.7336
12	A12	FALSE	T24-3	ACTIN	UNKNOWN	SYBR	None							15.6992	15.6456	0.0776738						TRUE	34770.3	TRUE	3	7	Inconclusive		0.989553	N	N	85.7336
13	B1	FALSE	SV-1	SCG2	UNKNOWN	SYBR	None				1	0.650535	1.5372	30.9822	31.3644	0.348852		15.08	0.386967	0.223416	0	TRUE	34020.6	TRUE	3	22	Amp		0.991156	N	N	81.9472
14	B2	FALSE	SV-2	SCG2	UNKNOWN	SYBR	None				0.797272	0.426165	1.49154	31.6187	31.7842	0.418677		15.4069	0.563737	0.325474	0.326856	TRUE	34020.6	TRUE	3	22	Amp		0.986467	N	N	82.0945
15	B3	FALSE	SV-3	SCG2	UNKNOWN	SYBR	None				1.46703	1.15456	1.86406	31.0613	31.0076	0.0525657		14.5271	0.215569	0.124459	-0.552897	TRUE	34020.6	TRUE	3	21	Amp		0.984084	N	N	81.9184
16	B4	FALSE	T24-1	SCG2	UNKNOWN	SYBR	None				8.69076	6.93406	10.8925	27.2207	27.1855	0.0373521		11.9606	0.203235	0.117338	-3.11948	TRUE	34020.6	TRUE	3	19	Amp		0.982276	N	N	81.9184
17	B5	FALSE	T24-2	SCG2	UNKNOWN	SYBR	None				21.5337	18.5352	25.0173	27.3339	27.3003	0.0639164		10.6515	0.134955	0.0779163	-4.42852	TRUE	34020.6	TRUE	3	19	Amp		0.984838	N	N	82.0993
18	B6	FALSE	T24-3	SCG2	UNKNOWN	SYBR	None				18.1318	16.3591	20.0966	26.599	26.5452	0.0504076		10.8996	0.0925967	0.0534607	-4.18045	TRUE	34020.6	TRUE	3	19	Amp		0.989788	N	N	82.0993
19	B7	FALSE	SW1710-1	SCG2	UNKNOWN	SYBR	None				1.4882	0.994362	2.2273	30.3307	30.5254	0.232888		14.5065	0.362902	0.209521	-0.573568	TRUE	34020.6	TRUE	3	19	Amp		0.980144	N	N	82.2243
20	B8	FALSE	SW1710-2	SCG2	UNKNOWN	SYBR	None				1.37531	1.00594	1.88031	30.4173	30.2639	0.24232		14.6203	0.281484	0.162515	-0.459755	TRUE	34020.6	TRUE	3	22	Amp		0.987037	N	N	82.0771
21	B9	FALSE	SW1710-3	SCG2	UNKNOWN	SYBR	None				2.86124	1.87553	4.365	30.5836	30.2822	0.301311		13.5634	0.380131	0.219469	-1.51664	TRUE	34020.6	TRUE	3	22	Amp		0.989883	N	N	82.2506
22	B10	FALSE	SV-1	ACTIN	UNKNOWN	SYBR	None							16.0911	16.2844	0.167468						TRUE	34770.3	TRUE	3	9	Inconclusive		0.983001	N	N	85.9343
23	B11	FALSE	SV-2	ACTIN	UNKNOWN	SYBR	None							15.9775	16.3773	0.377503						TRUE	34770.3	TRUE	3	10	Inconclusive		0.986228	N	N	85.7336
24	B12	FALSE	SV-3	ACTIN	UNKNOWN	SYBR	None							16.3283	16.4804	0.209062						TRUE	34770.3	TRUE	3	9	Inconclusive		0.978937	N	N	85.7336
25	C1	FALSE	SV-1	SCG2	UNKNOWN	SYBR	None				1	0.650535	1.5372	31.4454	31.3644	0.348852		15.08	0.386967	0.223416	0	TRUE	34020.6	TRUE	3	23	Amp		0.985343	N	N	81.9472
26	C2	FALSE	SV-2	SCG2	UNKNOWN	SYBR	None				0.797272	0.426165	1.49154	32.2603	31.7842	0.418677		15.4069	0.563737	0.325474	0.326856	TRUE	34020.6	TRUE	3	24	Amp		0.990388	N	N	82.0945
27	C3	FALSE	SV-3	SCG2	UNKNOWN	SYBR	None				1.46703	1.15456	1.86406	31.0051	31.0076	0.0525657		14.5271	0.215569	0.124459	-0.552897	TRUE	34020.6	TRUE	3	22	Amp		0.985384	N	N	81.9184
28	C4	FALSE	T24-1	SCG2	UNKNOWN	SYBR	None				8.69076	6.93406	10.8925	27.1894	27.1855	0.0373521		11.9606	0.203235	0.117338	-3.11948	TRUE	34020.6	TRUE	3	18	Amp		0.98248	N	N	81.9184
29	C5	FALSE	T24-2	SCG2	UNKNOWN	SYBR	None				21.5337	18.5352	25.0173	27.3403	27.3003	0.0639164		10.6515	0.134955	0.0779163	-4.42852	TRUE	34020.6	TRUE	3	18	Amp		0.988348	N	N	81.952
30	C6	FALSE	T24-3	SCG2	UNKNOWN	SYBR	None				18.1318	16.3591	20.0966	26.499	26.5452	0.0504076		10.8996	0.0925967	0.0534607	-4.18045	TRUE	34020.6	TRUE	3	19	Amp		0.985957	N	N	81.952
31	C7	FALSE	SW1710-1	SCG2	UNKNOWN	SYBR	None				1.4882	0.994362	2.2273	30.7834	30.5254	0.232888		14.5065	0.362902	0.209521	-0.573568	TRUE	34020.6	TRUE	3	21	Amp		0.979318	N	N	81.93
32	C8	FALSE	SW1710-2	SCG2	UNKNOWN	SYBR	None				1.37531	1.00594	1.88031	30.3899	30.2639	0.24232		14.6203	0.281484	0.162515	-0.459755	TRUE	34020.6	TRUE	3	20	Amp		0.986113	N	N	81.93
33	C9	FALSE	SW1710-3	SCG2	UNKNOWN	SYBR	None				2.86124	1.87553	4.365	30.2821	30.2822	0.301311		13.5634	0.380131	0.219469	-1.51664	TRUE	34020.6	TRUE	3	21	Amp		0.98207	N	N	82.1033
34	C10	FALSE	SW1710-1	ACTIN	UNKNOWN	SYBR	None							15.7208	16.0189	0.278318						TRUE	34770.3	TRUE	3	8	Inconclusive		0.984541	N	N	85.787
35	C11	FALSE	SW1710-2	ACTIN	UNKNOWN	SYBR	None							15.7565	15.6436	0.143228						TRUE	34770.3	TRUE	3	9	Inconclusive		0.976625	N	N	85.7336
36	C12	FALSE	SW1710-3	ACTIN	UNKNOWN	SYBR	None							16.4512	16.7188	0.231757						TRUE	34770.3	TRUE	3	9	Inconclusive		0.98161	Y	N	85.5866
37	D1	FALSE	SV-1	COL5A2	UNKNOWN	SYBR	None				1	0.512447	1.95142	29.9555	30.0634	0.577933		13.779	0.601708	0.347396	0	TRUE	30485.7	TRUE	3	22	Amp		0.993069	N	Y	79.5906
38	D2	FALSE	SV-2	COL5A2	UNKNOWN	SYBR	None				0.613003	0.326646	1.1504	31.2995	30.8624	0.422454		14.4851	0.566547	0.327096	0.706035	TRUE	30485.7	TRUE	3	19	Amp		0.985165	N	N	79.7379
39	D3	FALSE	SV-3	COL5A2	UNKNOWN	SYBR	None				0.529055	0.295773	0.946328	30.743	31.178	0.479782		14.6976	0.523353	0.302158	0.918512	TRUE	30485.7	TRUE	3	20	Amp		0.991083	N	N	79.712
40	D4	FALSE	T24-1	COL5A2	UNKNOWN	SYBR	None				364.525	284.072	467.762	20.4248	20.4941	0.102273		5.26918	0.224431	0.129575	-8.50987	TRUE	30485.7	TRUE	3	11	Amp		0.966828	N	N	79.8591
41	D5	FALSE	T24-2	COL5A2	UNKNOWN	SYBR	None				366.129	250.686	534.735	22.1609	21.9116	0.319518		5.26284	0.34091	0.196824	-8.51621	TRUE	30485.7	TRUE	3	16	Amp		0.987997	N	N	79.7422
42	D6	FALSE	T24-3	COL5A2	UNKNOWN	SYBR	None				433.105	345.065	543.607	20.6155	20.6661	0.1892		5.02048	0.204523	0.118082	-8.75857	TRUE	30485.7	TRUE	3	12	Amp		0.968565	N	N	79.7422
43	D7	FALSE	SW1710-1	COL5A2	UNKNOWN	SYBR	None				2.81963	1.90568	4.17188	28.0536	28.3025	0.216468		12.2835	0.352589	0.203568	-1.4955	TRUE	30485.7	TRUE	3	19	Amp		0.971988	N	N	79.5751
44	D8	FALSE	SW1710-2	COL5A2	UNKNOWN	SYBR	None				2.22334	1.8479	2.67506	28.2598	28.27	0.0848332		12.6263	0.166466	0.0961094	-1.15273	TRUE	30485.7	TRUE	3	20	Amp		0.975866	N	N	79.5751
45	D9	FALSE	SW1710-3	COL5A2	UNKNOWN	SYBR	None				2.34291	1.59116	3.44983	28.97	29.2696	0.259922		12.5507	0.34824	0.201056	-1.2283	TRUE	30485.7	TRUE	3	18	Amp		0.98174	N	N	79.7457
49	E1	FALSE	SV-1	COL5A2	UNKNOWN	SYBR	None				1	0.512447	1.95142	29.5471	30.0634	0.577933		13.779	0.601708	0.347396	0	TRUE	30485.7	TRUE	3	21	Amp		0.986017	N	Y	79.4433
50	E2	FALSE	SV-2	COL5A2	UNKNOWN	SYBR	None				0.613003	0.326646	1.1504	30.8314	30.8624	0.422454		14.4851	0.566547	0.327096	0.706035	TRUE	30485.7	TRUE	3	22	Amp		0.992136	N	N	79.5906
51	E3	FALSE	SV-3	COL5A2	UNKNOWN	SYBR	None				0.529055	0.295773	0.946328	31.0983	31.178	0.479782		14.6976	0.523353	0.302158	0.918512	TRUE	30485.7	TRUE	3	23	Amp		0.986359	N	N	79.8591
52	E4	FALSE	T24-1	COL5A2	UNKNOWN	SYBR	None				364.525	284.072	467.762	20.4459	20.4941	0.102273		5.26918	0.224431	0.129575	-8.50987	TRUE	30485.7	TRUE	3	13	Amp		0.967862	N	N	80.0062
53	E5	FALSE	T24-2	COL5A2	UNKNOWN	SYBR	None				366.129	250.686	534.735	22.0225	21.9116	0.319518		5.26284	0.34091	0.196824	-8.51621	TRUE	30485.7	TRUE	3	13	Amp		0.985289	N	N	79.7422
54	E6	FALSE	T24-3	COL5A2	UNKNOWN	SYBR	None				433.105	345.065	543.607	20.5073	20.6661	0.1892		5.02048	0.204523	0.118082	-8.75857	TRUE	30485.7	TRUE	3	12	Amp		0.980354	N	N	79.7422
55	E7	FALSE	SW1710-1	COL5A2	UNKNOWN	SYBR	None				2.81963	1.90568	4.17188	28.4465	28.3025	0.216468		12.2835	0.352589	0.203568	-1.4955	TRUE	30485.7	TRUE	3	20	Amp		0.977057	N	N	79.5751
56	E8	FALSE	SW1710-2	COL5A2	UNKNOWN	SYBR	None				2.22334	1.8479	2.67506	28.1906	28.27	0.0848332		12.6263	0.166466	0.0961094	-1.15273	TRUE	30485.7	TRUE	3	19	Amp		0.974974	N	N	79.5751
57	E9	FALSE	SW1710-3	COL5A2	UNKNOWN	SYBR	None				2.34291	1.59116	3.44983	29.4356	29.2696	0.259922		12.5507	0.34824	0.201056	-1.2283	TRUE	30485.7	TRUE	3	21	Amp		0.983276	N	N	79.7457
61	F1	FALSE	SV-1	COL5A2	UNKNOWN	SYBR	None				1	0.512447	1.95142	30.6877	30.0634	0.577933		13.779	0.601708	0.347396	0	TRUE	30485.7	TRUE	3	22	Amp		0.985962	N	Y	79.4433
62	F2	FALSE	SV-2	COL5A2	UNKNOWN	SYBR	None				0.613003	0.326646	1.1504	30.4563	30.8624	0.422454		14.4851	0.566547	0.327096	0.706035	TRUE	30485.7	TRUE	3	23	Amp		0.986551	N	N	79.4433
63	F3	FALSE	SV-3	COL5A2	UNKNOWN	SYBR	None				0.529055	0.295773	0.946328	31.6926	31.178	0.479782		14.6976	0.523353	0.302158	0.918512	TRUE	30485.7	TRUE	3	22	Amp		0.987498	N	N	80.0062
64	F4	FALSE	T24-1	COL5A2	UNKNOWN	SYBR	None				364.525	284.072	467.762	20.6116	20.4941	0.102273		5.26918	0.224431	0.129575	-8.50987	TRUE	30485.7	TRUE	3	13	Amp		0.98235	N	N	80.1533
65	F5	FALSE	T24-2	COL5A2	UNKNOWN	SYBR	None				366.129	250.686	534.735	21.5514	21.9116	0.319518		5.26284	0.34091	0.196824	-8.51621	TRUE	30485.7	TRUE	3	14	Amp		0.982306	N	N	79.7422
66	F6	FALSE	T24-3	COL5A2	UNKNOWN	SYBR	None				433.105	345.065	543.607	20.8754	20.6661	0.1892		5.02048	0.204523	0.118082	-8.75857	TRUE	30485.7	TRUE	3	15	Amp		0.982676	N	N	79.7422
67	F7	FALSE	SW1710-1	COL5A2	UNKNOWN	SYBR	None				2.81963	1.90568	4.17188	28.4074	28.3025	0.216468		12.2835	0.352589	0.203568	-1.4955	TRUE	30485.7	TRUE	3	20	Amp		0.974005	N	N	79.5751
68	F8	FALSE	SW1710-2	COL5A2	UNKNOWN	SYBR	None				2.22334	1.8479	2.67506	28.3594	28.27	0.0848332		12.6263	0.166466	0.0961094	-1.15273	TRUE	30485.7	TRUE	3	20	Amp		0.977258	N	N	79.5751
69	F9	FALSE	SW1710-3	COL5A2	UNKNOWN	SYBR	None				2.34291	1.59116	3.44983	29.4031	29.2696	0.259922		12.5507	0.34824	0.201056	-1.2283	TRUE	30485.7	TRUE	3	20	Amp		0.988396	N	N	79.7457
73	G1	FALSE	SV-1	ACTIN	UNKNOWN	SYBR	None							16.387	16.2844	0.167468						TRUE	34770.3	TRUE	3	10	Inconclusive		0.984252	N	N	85.1876
74	G2	FALSE	SV-2	ACTIN	UNKNOWN	SYBR	None							16.7276	16.3773	0.377503						TRUE	34770.3	TRUE	3	10	Inconclusive		0.98658	N	N	85.1876
75	G3	FALSE	SV-3	ACTIN	UNKNOWN	SYBR	None							16.7188	16.4804	0.209062						TRUE	34770.3	TRUE	3	9	Inconclusive		0.985835	N	N	86.1841
76	G4	FALSE	T24-1	ACTIN	UNKNOWN	SYBR	None							15.3401	15.2249	0.199774						TRUE	34770.3	TRUE	3	8	Inconclusive		0.98641	N	N	86.4783
77	G5	FALSE	T24-2	ACTIN	UNKNOWN	SYBR	None							16.6019	16.6487	0.118859						TRUE	34770.3	TRUE	3	10	Inconclusive		0.986556	N	N	85.7823
78	G6	FALSE	T24-3	ACTIN	UNKNOWN	SYBR	None							15.5565	15.6456	0.0776738						TRUE	34770.3	TRUE	3	8	Inconclusive		0.984589	N	N	85.635
79	G7	FALSE	SW1710-1	ACTIN	UNKNOWN	SYBR	None							16.2718	16.0189	0.278318						TRUE	34770.3	TRUE	3	9	Inconclusive		0.967318	N	N	85.4622
80	G8	FALSE	SW1710-2	ACTIN	UNKNOWN	SYBR	None							15.4825	15.6436	0.143228						TRUE	34770.3	TRUE	3	8	Inconclusive		0.981619	N	N	85.4622
81	G9	FALSE	SW1710-3	ACTIN	UNKNOWN	SYBR	None							16.8531	16.7188	0.231757						TRUE	34770.3	TRUE	3	10	Inconclusive		0.988833	N	N	85.6396
85	H1	FALSE	SV-1	ACTIN	UNKNOWN	SYBR	None							16.375	16.2844	0.167468						TRUE	34770.3	TRUE	3	8	Inconclusive		0.987545	N	N	85.1876
86	H2	FALSE	SV-2	ACTIN	UNKNOWN	SYBR	None							16.4269	16.3773	0.377503						TRUE	34770.3	TRUE	3	8	Inconclusive		0.987738	N	N	85.3349
87	H3	FALSE	SV-3	ACTIN	UNKNOWN	SYBR	None							16.3942	16.4804	0.209062						TRUE	34770.3	TRUE	3	9	Inconclusive		0.987867	N	N	86.3312
88	H4	FALSE	T24-1	ACTIN	UNKNOWN	SYBR	None							14.9942	15.2249	0.199774						TRUE	34770.3	TRUE	3	7	Inconclusive		0.991092	N	N	86.4783
89	H5	FALSE	T24-2	ACTIN	UNKNOWN	SYBR	None							16.7839	16.6487	0.118859						TRUE	34770.3	TRUE	3	10	Inconclusive		0.989369	N	N	85.7823
90	H6	FALSE	T24-3	ACTIN	UNKNOWN	SYBR	None							15.6811	15.6456	0.0776738						TRUE	34770.3	TRUE	3	7	Inconclusive		0.989994	N	N	85.7823
91	H7	FALSE	SW1710-1	ACTIN	UNKNOWN	SYBR	None							16.0642	16.0189	0.278318						TRUE	34770.3	TRUE	3	8	Inconclusive		0.977747	N	N	85.4622
92	H8	FALSE	SW1710-2	ACTIN	UNKNOWN	SYBR	None							15.6919	15.6436	0.143228						TRUE	34770.3	TRUE	3	7	Inconclusive		0.987137	N	N	85.4622
93	H9	FALSE	SW1710-3	ACTIN	UNKNOWN	SYBR	None							16.8522	16.7188	0.231757						TRUE	34770.3	TRUE	3	10	Inconclusive		0.988595	N	N	85.787
RQ minimum/maximum confidence	95.0
Reference gene	ACTIN
Analysis type	Single
Control sample	SV-1

## Sheet: Raw dissolution curve data
Instrument Name	2765220071247
Instrument Mode	QuantStudio™ 5 System
Serial Number	2765220071247
Signal Smoothing	true
Creation Date	2024-08-04 17:58:45 afternoon CST
Heating Module Type	96-Well 0.2-mL Block
Reference Fluorescence
Analysis at a specific stage/cycle	stage2, step2
Experiment Name	2024-08-04_T24
Experiment File Name	D:\ZZH\2024-08-04_T24.eds
Experiment Barcode
Experiment Annotation
Experiment Type	Quantitative-Comparison
Experiment End Time	2024-08-04 17:42:18 afternoon CST
Calibration Background Expired	No
Calibration Background Perform	09-28-2022
Calibration Pure Dye ABY Expired	No
Calibration Pure Dye ABY Perform	09-28-2022
Calibration Pure Dye CY5 Expired	No
Calibration Pure Dye CY5 Perform	09-28-2022
Calibration Pure Dye FAM Expired	No
Calibration Pure Dye FAM Perform	09-28-2022
Calibration Pure Dye JUN Expired	No
Calibration Pure Dye JUN Perform	09-28-2022
Calibration Pure Dye MUSTANG PURPLE Expired	No
Calibration Pure Dye MUSTANG PURPLE Perform	09-28-2022
Calibration Pure Dye NED Expired	No
Calibration Pure Dye NED Perform	09-28-2022
Calibration Pure Dye ROX Expired	No
Calibration Pure Dye ROX Perform	09-28-2022
Calibration Pure Dye SYBR Expired	No
Calibration Pure Dye SYBR Perform	09-28-2022
Calibration Pure Dye TAMRA Expired	No
Calibration Pure Dye TAMRA 执行	09-28-2022
Calibration Pure Dye VIC Expired	No
Calibration Pure Dye VIC Perform	09-28-2022
Calibration ROI Expired	No
Calibration ROI Perform	09-28-2022
Calibration Uniformity Expired	No
Calibration Uniformity Perform	09-28-2022
Melt Curve Stage	Stage3
Username
Reagent	SYBR_GREEN
Post-read Stage/Step
Quantification Cycle Method	Ct
Pre-read Stage/Step Number
Reaction Well	Reaction Well Position	Reading	Temperature	Fluorescence	Derivative	Gene Name
1	A1	1	60.0009	337467	8978.07	SCG2
1	A1	2	60.2955	335964	9107.47	SCG2
1	A1	3	60.5901	334191	9234.57	SCG2
1	A1	4	60.8846	331390	9347.26	SCG2
1	A1	5	61.1792	327822	9426.49	SCG2
1	A1	6	61.4738	324964	9467.19	SCG2
1	A1	7	61.7684	322713	9480.95	SCG2
1	A1	8	62.063	318938	9490.27	SCG2
1	A1	9	62.3576	316517	9517.86	SCG2
1	A1	10	62.6521	313178	9575.09	SCG2
1	A1	11	62.9467	311174	9655.36	SCG2
1	A1	12	63.2413	308363	9736.76	SCG2
1	A1	13	63.5359	304161	9793.09	SCG2
1	A1	14	63.8305	301520	9807.49	SCG2
1	A1	15	64.125	297774	9780.28	SCG2
1	A1	16	64.4196	294624	9726.33	SCG2
1	A1	17	64.7142	292934	9665.11	SCG2
1	A1	18	65.0088	289173	9611.42	SCG2
1	A1	19	65.3034	285925	9571.46	SCG2
1	A1	20	65.5979	283569	9544.4	SCG2
1	A1	21	65.8925	279463	9525.87	SCG2
1	A1	22	66.1871	278350	9510.18	SCG2
1	A1	23	66.4817	273639	9492.14	SCG2
1	A1	24	66.7763	271575	9468.46	SCG2
1	A1	25	67.0709	268200	9439.34	SCG2
1	A1	26	67.3654	264879	9408	SCG2
1	A1	27	67.66	263040	9378.23	SCG2
1	A1	28	67.9546	259501	9351.71	SCG2
1	A1	29	68.2492	256170	9327.02	SCG2
1	A1	30	68.5438	254068	9301.17	SCG2
1	A1	31	68.8383	250612	9271.67	SCG2
1	A1	32	69.1329	247823	9237.35	SCG2
1	A1	33	69.4275	244996	9197.89	SCG2
1	A1	34	69.7221	242402	9152.85	SCG2
1	A1	35	70.0167	239427	9102.36	SCG2
1	A1	36	70.3112	236556	9047.96	SCG2
1	A1	37	70.6058	233518	8987.64	SCG2
1	A1	38	70.9004	230952	8941.81	SCG2
1	A1	39	71.195	229184	8920.56	SCG2
1	A1	40	71.4896	225504	8929.53	SCG2
1	A1	41	71.7842	222835	8968.12	SCG2
1	A1	42	72.0787	220656	9031.49	SCG2
1	A1	43	72.3733	217319	9103.86	SCG2
1	A1	44	72.6679	214609	9184.69	SCG2
1	A1	45	72.9625	212015	9274.87	SCG2
1	A1	46	73.2571	208772	9370.9	SCG2
1	A1	47	73.5517	205810	9465.31	SCG2
1	A1	48	73.8462	203653	9544.11	SCG2
1	A1	49	74.1408	200274	9587.31	SCG2
1	A1	50	74.4354	196668	9573.92	SCG2
1	A1	51	74.73	193795	9489.8	SCG2
1	A1	52	75.0246	191149	9334.38	SCG2
1	A1	53	75.3191	187373	9121.88	SCG2
1	A1	54	75.6137	185805	8842.81	SCG2
1	A1	55	75.9083	182527	8544.28	SCG2
1	A1	56	76.2029	180825	8267.06	SCG2
1	A1	57	76.4975	177484	8029.03	SCG2
1	A1	58	76.792	175932	7838.67	SCG2
1	A1	59	77.0866	173382	7697.82	SCG2
1	A1	60	77.3812	171288	7605.08	SCG2
1	A1	61	77.6758	168600	7558.92	SCG2
1	A1	62	77.9704	166582	7561.02	SCG2
1	A1	63	78.265	164202	7620.66	SCG2
1	A1	64	78.5595	162531	7763.29	SCG2
1	A1	65	78.8541	159370	8047.26	SCG2
1	A1	66	79.1487	157480	8588.96	SCG2
1	A1	67	79.4433	154154	9502.61	SCG2
1	A1	68	79.7379	152952	10975.4	SCG2
1	A1	69	80.0324	149815	13390.1	SCG2
1	A1	70	80.327	146816	17029.1	SCG2
1	A1	71	80.6216	143592	22006.2	SCG2
1	A1	72	80.9162	137480	28091.3	SCG2
1	A1	73	81.2108	129178	34588.1	SCG2
1	A1	74	81.5053	113009	40372	SCG2
1	A1	75	81.7999	84262.2	44151.1	SCG2
1	A1	76	82.0945	48021.6	44895.4	SCG2
1	A1	77	82.3891	23830.1	42246.8	SCG2
1	A1	78	82.6837	16101.3	36693.1	SCG2
1	A1	79	82.9783	14265.2	29396.3	SCG2
1	A1	80	83.2728	14227.8	21761	SCG2
1	A1	81	83.5674	14677.4	14968.3	SCG2
1	A1	82	83.862	13594.5	9687.94	SCG2
1	A1	83	84.1566	14143	5466.08	SCG2
1	A1	84	84.4512	13784.7	2792	SCG2
1	A1	85	84.7457	13718.1	1315.46	SCG2
1	A1	86	85.0403	13366.4	583.856	SCG2
1	A1	87	85.3349	13578.5	261.106	SCG2
1	A1	88	85.6295	13700.9	136.288	SCG2
1	A1	89	85.9241	13178.3	91.9258	SCG2
1	A1	90	86.2186	12504.1	68.8545	SCG2
1	A1	91	86.5132	12696.5	42.4795	SCG2
1	A1	92	86.8078	13890.5	8.97461	SCG2
1	A1	93	87.1024	11919.1	-25.0889	SCG2
1	A1	94	87.397	12966.7	-52.3574	SCG2
1	A1	95	87.6916	13307.9	-71.666	SCG2
1	A1	96	87.9861	12390.5	-89.1357	SCG2
1	A1	97	88.2807	12031.5	-113.219	SCG2
1	A1	98	88.5753	12510.8	-147.382	SCG2
1	A1	99	88.8699	12691	-186.083	SCG2
1	A1	100	89.1645	12779.8	-217.434	SCG2
1	A1	101	89.459	12238.5	-230.861	SCG2
1	A1	102	89.7536	12925.8	-224.258	SCG2
1	A1	103	90.0482	12200.8	-205.422	SCG2
1	A1	104	90.3428	12617.8	-186.983	SCG2
1	A1	105	90.6374	11774.1	-178.569	SCG2
1	A1	106	90.9319	12267.8	-181.603	SCG2
1	A1	107	91.2265	12839.6	-190.045	SCG2
1	A1	108	91.5211	12248.1	-196.049	SCG2
1	A1	109	91.8157	11956.8	-195.97	SCG2
1	A1	110	92.1103	12074.6	-192.365	SCG2
1	A1	111	92.4049	12576.5	-191.314	SCG2
1	A1	112	92.6994	11656.7	-198.107	SCG2
1	A1	113	92.994	12185.7	-214.813	SCG2
1	A1	114	93.2886	12027.9	-240.755	SCG2
1	A1	115	93.5832	12310.5	-274.214	SCG2
1	A1	116	93.8778	11768.7	-313.356	SCG2
1	A1	117	94.1723	11969	-355.731	SCG2
1	A1	118	94.4669	12018.9	-397.521	SCG2
1	A1	119	94.7615	12731.8	-434.05	SCG2
2	A2	1	60.0009	350494	9517.76	SCG2
2	A2	2	60.2955	347855	9610.76	SCG2
2	A2	3	60.5901	345207	9710.85	SCG2
2	A2	4	60.8846	342960	9808.78	SCG2
2	A2	5	61.1792	339210	9898.24	SCG2
2	A2	6	61.4738	336946	9974.13	SCG2
2	A2	7	61.7684	333998	10029.6	SCG2
2	A2	8	62.063	330094	10057.2	SCG2
2	A2	9	62.3576	327549	10054.2	SCG2
2	A2	10	62.6521	323449	10028.1	SCG2
2	A2	11	62.9467	320577	9997.08	SCG2
2	A2	12	63.2413	317103	9982.16	SCG2
2	A2	13	63.5359	314868	9995.71	SCG2
2	A2	14	63.8305	312028	10033.7	SCG2
2	A2	15	64.125	308300	10077.1	SCG2
2	A2	16	64.4196	305085	10101.9	SCG2
2	A2	17	64.7142	301912	10091.4	SCG2
2	A2	18	65.0088	297888	10042.9	SCG2
2	A2	19	65.3034	295671	9966.88	SCG2
2	A2	20	65.5979	291874	9879.18	SCG2
2	A2	21	65.8925	288915	9794.06	SCG2
2	A2	22	66.1871	286609	9719.72	SCG2
2	A2	23	66.4817	282342	9659.41	SCG2
2	A2	24	66.7763	280299	9614.04	SCG2
2	A2	25	67.0709	276307	9583.68	SCG2
2	A2	26	67.3654	274312	9565.9	SCG2
2	A2	27	67.66	270646	9553.98	SCG2
2	A2	28	67.9546	268408	9537.72	SCG2
2	A2	29	68.2492	264536	9509.12	SCG2
2	A2	30	68.5438	261156	9468.54	SCG2
2	A2	31	68.8383	258764	9426.47	SCG2
2	A2	32	69.1329	255746	9397.84	SCG2
2	A2	33	69.4275	253386	9391.79	SCG2
2	A2	34	69.7221	250136	9403.99	SCG2
2	A2	35	70.0167	247079	9417.55	SCG2
2	A2	36	70.3112	244425	9411.99	SCG2
2	A2	37	70.6058	241008	9374.4	SCG2
2	A2	38	70.9004	237385	9305.69	SCG2
2	A2	39	71.195	235284	9236.58	SCG2
2	A2	40	71.4896	232583	9199.73	SCG2
2	A2	41	71.7842	230236	9216.58	SCG2
2	A2	42	72.0787	227021	9286.7	SCG2
2	A2	43	72.3733	224169	9389.45	SCG2
2	A2	44	72.6679	221114	9482.3	SCG2
2	A2	45	72.9625	217388	9560.55	SCG2
2	A2	46	73.2571	214949	9616.77	SCG2
2	A2	47	73.5517	212129	9652.31	SCG2
2	A2	48	73.8462	208574	9669.75	SCG2
2	A2	49	74.1408	206360	9666.31	SCG2
2	A2	50	74.4354	203038	9633.05	SCG2
2	A2	51	74.73	199192	9559.29	SCG2
2	A2	52	75.0246	196907	9439	SCG2
2	A2	53	75.3191	194013	9256.32	SCG2
2	A2	54	75.6137	190569	9026.44	SCG2
2	A2	55	75.9083	188280	8775.23	SCG2
2	A2	56	76.2029	185925	8520.42	SCG2
2	A2	57	76.4975	182683	8276.71	SCG2
2	A2	58	76.792	181039	8055.15	SCG2
2	A2	59	77.0866	178173	7865.02	SCG2
2	A2	60	77.3812	175868	7715.93	SCG2
2	A2	61	77.6758	172938	7618.68	SCG2
2	A2	62	77.9704	172427	7584.39	SCG2
2	A2	63	78.265	168592	7625.38	SCG2
2	A2	64	78.5595	166930	7762.29	SCG2
2	A2	65	78.8541	164352	8040.95	SCG2
2	A2	66	79.1487	161903	8558.25	SCG2
2	A2	67	79.4433	159407	9475.32	SCG2
2	A2	68	79.7379	156448	10863.6	SCG2
2	A2	69	80.0324	154667	13134.3	SCG2
2	A2	70	80.327	151135	16582.4	SCG2
2	A2	71	80.6216	147961	21378	SCG2
2	A2	72	80.9162	142189	27401.6	SCG2
2	A2	73	81.2108	132508	34100.9	SCG2
2	A2	74	81.5053	120838	40466.8	SCG2
2	A2	75	81.7999	95440.1	45213.4	SCG2
2	A2	76	82.0945	61585.9	47154.4	SCG2
2	A2	77	82.3891	29810.4	45641.7	SCG2
2	A2	78	82.6837	15141.1	40849.4	SCG2
2	A2	79	82.9783	11978.8	33738.6	SCG2
2	A2	80	83.2728	11368.7	25707.9	SCG2
2	A2	81	83.5674	11733.7	18108.8	SCG2
2	A2	82	83.862	10831.5	11861.7	SCG2
2	A2	83	84.1566	11380.8	6983.16	SCG2
2	A2	84	84.4512	11335.4	3552.63	SCG2
2	A2	85	84.7457	10469.4	1552.04	SCG2
2	A2	86	85.0403	11135.2	510.293	SCG2
2	A2	87	85.3349	11253.8	43.3105	SCG2
2	A2	88	85.6295	11835.9	-109.854	SCG2
2	A2	89	85.9241	10812.8	-109.147	SCG2
2	A2	90	86.2186	10335.5	-49.125	SCG2
2	A2	91	86.5132	11021	15.499	SCG2
2	A2	92	86.8078	10603.8	56.876	SCG2
2	A2	93	87.1024	9550.28	66.9141	SCG2
2	A2	94	87.397	10639.2	50.4414	SCG2
2	A2	95	87.6916	10160.8	17.5811	SCG2
2	A2	96	87.9861	10075.5	-22.8564	SCG2
2	A2	97	88.2807	9552.48	-66.7061	SCG2
2	A2	98	88.5753	10186.6	-113.893	SCG2
2	A2	99	88.8699	9470.33	-165.363	SCG2
2	A2	100	89.1645	9799.76	-220.084	SCG2
2	A2	101	89.459	10071.4	-273.817	SCG2
2	A2	102	89.7536	9421.58	-319.615	SCG2
2	A2	103	90.0482	9848.68	-349.195	SCG2
2	A2	104	90.3428	9941.67	-354.992	SCG2
2	A2	105	90.6374	9901.26	-333.139	SCG2
2	A2	106	90.9319	10315.6	-286.377	SCG2
2	A2	107	91.2265	9260.32	-224.564	SCG2
2	A2	108	91.5211	9278.56	-161.478	SCG2
2	A2	109	91.8157	9819.46	-109.849	SCG2
2	A2	110	92.1103	9432.34	-78.418	SCG2
2	A2	111	92.4049	9140.38	-72.5371	SCG2
2	A2	112	92.6994	9016.11	-95.6631	SCG2
2	A2	113	92.994	9029.59	-148.108	SCG2
2	A2	114	93.2886	8559.89	-223.124	SCG2
2	A2	115	93.5832	9100.24	-304.896	SCG2
2	A2	116	93.8778	10121	-372.779	SCG2
2	A2	117	94.1723	8798.2	-410.688	SCG2
2	A2	118	94.4669	8890.79	-415.196	SCG2
2	A2	119	94.7615	9619.42	-396.309	SCG2
3	A3	1	60.0016	356397	10459.4	SCG2
3	A3	2	60.2958	353032	10504.9	SCG2
3	A3	3	60.59	350495	10541.5	SCG2
3	A3	4	60.8842	348101	10556.3	SCG2
3	A3	5	61.1783	344150	10547.5	SCG2
3	A3	6	61.4725	341053	10524.8	SCG2
3	A3	7	61.7667	338766	10503.4	SCG2
3	A3	8	62.0609	334702	10496.2	SCG2
3	A3	9	62.3551	331317	10506.8	SCG2
3	A3	10	62.6493	329081	10526.7	SCG2
3	A3	11	62.9435	325274	10539.8	SCG2
3	A3	12	63.2376	322433	10530.7	SCG2
3	A3	13	63.5318	317595	10493.4	SCG2
3	A3	14	63.826	315193	10434.3	SCG2
3	A3	15	64.1202	311824	10368.7	SCG2
3	A3	16	64.4144	308634	10312.4	SCG2
3	A3	17	64.7086	306518	10274.5	SCG2
3	A3	18	65.0028	301728	10256.2	SCG2
3	A3	19	65.2969	299207	10252.1	SCG2
3	A3	20	65.5911	296201	10252.4	SCG2
3	A3	21	65.8853	293001	10246.6	SCG2
3	A3	22	66.1795	289987	10226.5	SCG2
3	A3	23	66.4737	285581	10189.9	SCG2
3	A3	24	66.7679	283219	10142	SCG2
3	A3	25	67.0621	280018	10092.1	SCG2
3	A3	26	67.3562	276912	10047.7	SCG2
3	A3	27	67.6504	273985	10010.3	SCG2
3	A3	28	67.9446	271026	9976.13	SCG2
3	A3	29	68.2388	267011	9939.87	SCG2
3	A3	30	68.533	264524	9891.96	SCG2
3	A3	31	68.8272	261373	9836.29	SCG2
3	A3	32	69.1214	258620	9777.89	SCG2
3	A3	33	69.4155	255403	9718.16	SCG2
3	A3	34	69.7097	252050	9657.19	SCG2
3	A3	35	70.0039	249716	9596.75	SCG2
3	A3	36	70.2981	246401	9543.38	SCG2
3	A3	37	70.5923	243689	9510.75	SCG2
3	A3	38	70.8865	240390	9517.86	SCG2
3	A3	39	71.1807	237879	9584.25	SCG2
3	A3	40	71.4748	235394	9723.65	SCG2
3	A3	41	71.769	232838	9938.33	SCG2
3	A3	42	72.0632	228443	10174	SCG2
3	A3	43	72.3574	226257	10463.8	SCG2
3	A3	44	72.6516	222721	10801.4	SCG2
3	A3	45	72.9458	219235	11177.9	SCG2
3	A3	46	73.24	215819	11576.1	SCG2
3	A3	47	73.5341	212044	11966.1	SCG2
3	A3	48	73.8283	208267	12305.4	SCG2
3	A3	49	74.1225	204252	12548.2	SCG2
3	A3	50	74.4167	198956	12659.2	SCG2
3	A3	51	74.7109	194161	12625.1	SCG2
3	A3	52	75.0051	191039	12457.6	SCG2
3	A3	53	75.2993	186834	12184.4	SCG2
3	A3	54	75.5934	182869	11835.6	SCG2
3	A3	55	75.8876	179811	11433.5	SCG2
3	A3	56	76.1818	175601	10990.9	SCG2
3	A3	57	76.476	172524	10517.4	SCG2
3	A3	58	76.7702	169232	10027.1	SCG2
3	A3	59	77.0644	166698	9453.43	SCG2
3	A3	60	77.3586	163905	8905.19	SCG2
3	A3	61	77.6527	160952	8449.53	SCG2
3	A3	62	77.9469	160020	8125.13	SCG2
3	A3	63	78.2411	157285	7960.82	SCG2
3	A3	64	78.5353	154756	7980.61	SCG2
3	A3	65	78.8295	153023	8223.62	SCG2
3	A3	66	79.1237	150817	8777.42	SCG2
3	A3	67	79.4179	147116	9814.59	SCG2
3	A3	68	79.712	144899	11289.8	SCG2
3	A3	69	80.0062	142762	13638	SCG2
3	A3	70	80.3004	140000	17133.8	SCG2
3	A3	71	80.5946	136184	21856.4	SCG2
3	A3	72	80.8888	131515	27546.4	SCG2
3	A3	73	81.183	121996	33504.4	SCG2
3	A3	74	81.4772	107947	38652.3	SCG2
3	A3	75	81.7713	81745.5	41801.5	SCG2
3	A3	76	82.0655	46992.1	42058.5	SCG2
3	A3	77	82.3597	20145.6	39189	SCG2
3	A3	78	82.6539	11563.9	33740.5	SCG2
3	A3	79	82.9481	10289.1	26846.1	SCG2
3	A3	80	83.2423	10134.8	19806.2	SCG2
3	A3	81	83.5365	9953.5	13665.6	SCG2
3	A3	82	83.8306	10062.4	8751.36	SCG2
3	A3	83	84.1248	9443.17	4827.68	SCG2
3	A3	84	84.419	9856.92	2458.05	SCG2
3	A3	85	84.7132	9259.55	1184.52	SCG2
3	A3	86	85.0074	9807.5	586.896	SCG2
3	A3	87	85.3016	9660.87	357.404	SCG2
3	A3	88	85.5958	9676.71	300.625	SCG2
3	A3	89	85.8899	8981.46	304.496	SCG2
3	A3	90	86.1841	8167.35	311.999	SCG2
3	A3	91	86.4783	9330.48	301.412	SCG2
3	A3	92	86.7725	8522.27	271.716	SCG2
3	A3	93	87.0667	8743.8	230.254	SCG2
3	A3	94	87.3609	8456.25	184.06	SCG2
3	A3	95	87.6551	8048.16	136.933	SCG2
3	A3	96	87.9492	8625.52	91.0752	SCG2
3	A3	97	88.2434	8244.48	49.5078	SCG2
3	A3	98	88.5376	8510.85	16.4893	SCG2
3	A3	99	88.8318	7829.41	-4.05664	SCG2
3	A3	100	89.126	8877.62	-10.5771	SCG2
3	A3	101	89.4202	7688.3	-5.27051	SCG2
3	A3	102	89.7144	8636.6	5.70508	SCG2
3	A3	103	90.0085	8258.77	13.7363	SCG2
3	A3	104	90.3027	7460.91	11.1123	SCG2
3	A3	105	90.5969	8063.07	-5.13867	SCG2
3	A3	106	90.8911	8078.66	-31.4766	SCG2
3	A3	107	91.1853	8157.69	-59.6582	SCG2
3	A3	108	91.4795	7763.54	-81.0117	SCG2
3	A3	109	91.7737	7917.61	-90.3047	SCG2
3	A3	110	92.0678	8387.69	-87.2646	SCG2
3	A3	111	92.362	7734.72	-75.7988	SCG2
3	A3	112	92.6562	7777.73	-61.9951	SCG2
3	A3	113	92.9504	8235.33	-51.8691	SCG2
3	A3	114	93.2446	7572	-49.3574	SCG2
3	A3	115	93.5388	7634.98	-55.2266	SCG2
3	A3	116	93.833	8091.18	-67.4648	SCG2
3	A3	117	94.1271	7838.11	-82.9893	SCG2
3	A3	118	94.4213	7574.59	-99.4727	SCG2
3	A3	119	94.7155	7764.31	-116.06	SCG2
4	A4	1	60.0016	387923	9921.91	SCG2
4	A4	2	60.2958	385264	9951.54	SCG2
4	A4	3	60.59	381709	9979.87	SCG2
4	A4	4	60.8842	379493	10000.2	SCG2
4	A4	5	61.1783	377449	10011.9	SCG2
4	A4	6	61.4725	373355	10019.8	SCG2
4	A4	7	61.7667	370259	10031.5	SCG2
4	A4	8	62.0609	366888	10052.4	SCG2
4	A4	9	62.3551	364549	10081.5	SCG2
4	A4	10	62.6493	361209	10109.1	SCG2
4	A4	11	62.9435	357034	10119.4	SCG2
4	A4	12	63.2376	354726	10097.9	SCG2
4	A4	13	63.5318	351097	10040	SCG2
4	A4	14	63.826	347098	9954.97	SCG2
4	A4	15	64.1202	344160	9864.44	SCG2
4	A4	16	64.4144	341161	9792.75	SCG2
4	A4	17	64.7086	338805	9755.52	SCG2
4	A4	18	65.0028	335345	9752.28	SCG2
4	A4	19	65.2969	332500	9766.95	SCG2
4	A4	20	65.5911	328791	9776.18	SCG2
4	A4	21	65.8853	326029	9760.73	SCG2
4	A4	22	66.1795	322715	9714.92	SCG2
4	A4	23	66.4737	319120	9649.64	SCG2
4	A4	24	66.7679	315385	9586.74	SCG2
4	A4	25	67.0621	314122	9547.67	SCG2
4	A4	26	67.3562	310729	9542.47	SCG2
4	A4	27	67.6504	307631	9564.55	SCG2
4	A4	28	67.9446	304219	9593.9	SCG2
4	A4	29	68.2388	301121	9606.02	SCG2
4	A4	30	68.533	298692	9581.53	SCG2
4	A4	31	68.8272	294437	9513.5	SCG2
4	A4	32	69.1214	291558	9409.65	SCG2
4	A4	33	69.4155	289037	9289.42	SCG2
4	A4	34	69.7097	285405	9176.77	SCG2
4	A4	35	70.0039	283791	9091.01	SCG2
4	A4	36	70.2981	280993	9041.49	SCG2
4	A4	37	70.5923	277523	9024.53	SCG2
4	A4	38	70.8865	274629	9036.78	SCG2
4	A4	39	71.1807	272653	9059.14	SCG2
4	A4	40	71.4748	269410	9079.88	SCG2
4	A4	41	71.769	266868	9087.52	SCG2
4	A4	42	72.0632	262873	9076.61	SCG2
4	A4	43	72.3574	261039	9050.74	SCG2
4	A4	44	72.6516	257240	9018.69	SCG2
4	A4	45	72.9458	255499	8997.33	SCG2
4	A4	46	73.24	252521	9004.04	SCG2
4	A4	47	73.5341	249369	9034.88	SCG2
4	A4	48	73.8283	247296	9062.09	SCG2
4	A4	49	74.1225	244371	9068.95	SCG2
4	A4	50	74.4167	240927	9035.6	SCG2
4	A4	51	74.7109	237485	8933.07	SCG2
4	A4	52	75.0051	235372	8782.61	SCG2
4	A4	53	75.2993	232825	8611.93	SCG2
4	A4	54	75.5934	230057	8448.24	SCG2
4	A4	55	75.8876	227995	8306.9	SCG2
4	A4	56	76.1818	225113	8188.75	SCG2
4	A4	57	76.476	222895	8086.08	SCG2
4	A4	58	76.7702	219429	7992.54	SCG2
4	A4	59	77.0644	217814	7909.27	SCG2
4	A4	60	77.3586	215667	7845.19	SCG2
4	A4	61	77.6527	212555	7813.54	SCG2
4	A4	62	77.9469	210693	7829.91	SCG2
4	A4	63	78.2411	207985	7916.71	SCG2
4	A4	64	78.5353	206194	8117.38	SCG2
4	A4	65	78.8295	203407	8522.12	SCG2
4	A4	66	79.1237	200431	9241.66	SCG2
4	A4	67	79.4179	198051	10356.9	SCG2
4	A4	68	79.712	196220	12293.2	SCG2
4	A4	69	80.0062	192727	15408.7	SCG2
4	A4	70	80.3004	189774	19996	SCG2
4	A4	71	80.5946	186219	26102.5	SCG2
4	A4	72	80.8888	178956	33336.2	SCG2
4	A4	73	81.183	168527	40766.1	SCG2
4	A4	74	81.4772	147384	47031	SCG2
4	A4	75	81.7713	111688	50695.9	SCG2
4	A4	76	82.0655	68768.8	50749.3	SCG2
4	A4	77	82.3597	40034.8	47012.3	SCG2
4	A4	78	82.6539	28106.6	40236.7	SCG2
4	A4	79	82.9481	26426.1	31827.5	SCG2
4	A4	80	83.2423	26208.3	23333.9	SCG2
4	A4	81	83.5365	25241.9	15967.2	SCG2
4	A4	82	83.8306	24867.6	10350.1	SCG2
4	A4	83	84.1248	25454.8	5818.27	SCG2
4	A4	84	84.419	25339.4	2841.91	SCG2
4	A4	85	84.7132	25645.5	1236.73	SCG2
4	A4	86	85.0074	25506.9	477.896	SCG2
4	A4	87	85.3016	24686.8	176.108	SCG2
4	A4	88	85.5958	25460.5	85.2881	SCG2
4	A4	89	85.8899	24813.7	70.4609	SCG2
4	A4	90	86.1841	24183.9	69.0557	SCG2
4	A4	91	86.4783	24537.1	59.835	SCG2
4	A4	92	86.7725	24723.1	41.4326	SCG2
4	A4	93	87.0667	24474.1	18.6553	SCG2
4	A4	94	87.3609	23939.2	-4.76074	SCG2
4	A4	95	87.6551	24148.1	-27.9199	SCG2
4	A4	96	87.9492	24222.4	-51.1768	SCG2
4	A4	97	88.2434	23621	-74.0762	SCG2
4	A4	98	88.5376	24736.8	-94.3672	SCG2
4	A4	99	88.8318	23235.8	-107.802	SCG2
4	A4	100	89.126	23610.3	-108.646	SCG2
4	A4	101	89.4202	24173.7	-91.8965	SCG2
4	A4	102	89.7144	24021.3	-57.7031	SCG2
4	A4	103	90.0085	23630.6	-15.3555	SCG2
4	A4	104	90.3027	23171.2	17.4902	SCG2
4	A4	105	90.5969	23099.9	22.001	SCG2
4	A4	106	90.8911	23341.6	-11.8975	SCG2
4	A4	107	91.1853	22403.2	-79.127	SCG2
4	A4	108	91.4795	23450.9	-160.783	SCG2
4	A4	109	91.7737	23096.2	-232.31	SCG2
4	A4	110	92.0678	23002.4	-274.127	SCG2
4	A4	111	92.362	23687	-279.827	SCG2
4	A4	112	92.6562	22676.1	-258.531	SCG2
4	A4	113	92.9504	23804.6	-230.362	SCG2
4	A4	114	93.2446	21989.6	-217.005	SCG2
4	A4	115	93.5388	23226.8	-231.648	SCG2
4	A4	116	93.833	22462.4	-273.733	SCG2
4	A4	117	94.1271	23362.7	-331.305	SCG2
4	A4	118	94.4213	23029.4	-389.108	SCG2
4	A4	119	94.7155	22828.9	-436.788	SCG2
5	A5	1	60.0016	321479	9435.13	SCG2
5	A5	2	60.2962	319167	9519.44	SCG2
5	A5	3	60.5909	316278	9602.34	SCG2
5	A5	4	60.8855	313622	9674	SCG2
5	A5	5	61.1801	311245	9732.43	SCG2
5	A5	6	61.4748	307687	9781.77	SCG2
5	A5	7	61.7694	305359	9826.32	SCG2
5	A5	8	62.0641	301543	9865.16	SCG2
5	A5	9	62.3587	299592	9891.78	SCG2
5	A5	10	62.6533	295636	9899.26	SCG2
5	A5	11	62.948	292462	9886.86	SCG2
5	A5	12	63.2426	288799	9863.04	SCG2
5	A5	13	63.5372	286318	9841.48	SCG2
5	A5	14	63.8319	283347	9832.94	SCG2
5	A5	15	64.1265	280491	9838.69	SCG2
5	A5	16	64.4211	276986	9849.63	SCG2
5	A5	17	64.7158	274176	9851.16	SCG2
5	A5	18	65.0104	270636	9830.58	SCG2
5	A5	19	65.3051	267624	9781.59	SCG2
5	A5	20	65.5997	264012	9706	SCG2
5	A5	21	65.8943	261967	9612.77	SCG2
5	A5	22	66.189	258137	9515.89	SCG2
5	A5	23	66.4836	254635	9430.99	SCG2
5	A5	24	66.7782	252842	9370.59	SCG2
5	A5	25	67.0729	249732	9339.48	SCG2
5	A5	26	67.3675	247094	9333.2	SCG2
5	A5	27	67.6621	243694	9341.11	SCG2
5	A5	28	67.9568	240442	9351.66	SCG2
5	A5	29	68.2514	237668	9356.14	SCG2
5	A5	30	68.5461	235237	9349.39	SCG2
5	A5	31	68.8407	232312	9329.26	SCG2
5	A5	32	69.1353	228429	9297.12	SCG2
5	A5	33	69.43	225472	9258.64	SCG2
5	A5	34	69.7246	223748	9222.69	SCG2
5	A5	35	70.0192	220412	9197.92	SCG2
5	A5	36	70.3139	217573	9188.87	SCG2
5	A5	37	70.6085	214556	9194.43	SCG2
5	A5	38	70.9031	211465	9208.33	SCG2
5	A5	39	71.1978	210002	9220.77	SCG2
5	A5	40	71.4924	205726	9219.71	SCG2
5	A5	41	71.787	202775	9193.26	SCG2
5	A5	42	72.0817	200731	9133.7	SCG2
5	A5	43	72.3763	197501	9042.27	SCG2
5	A5	44	72.671	194181	8932.29	SCG2
5	A5	45	72.9656	191176	8806.18	SCG2
5	A5	46	73.2602	189809	8716.43	SCG2
5	A5	47	73.5549	186984	8683.35	SCG2
5	A5	48	73.8495	184696	8703.71	SCG2
5	A5	49	74.1441	181412	8752.22	SCG2
5	A5	50	74.4388	178653	8794.18	SCG2
5	A5	51	74.7334	175689	8800.73	SCG2
5	A5	52	75.0281	173174	8759.46	SCG2
5	A5	53	75.3227	170042	8674.27	SCG2
5	A5	54	75.6173	168432	8559.09	SCG2
5	A5	55	75.912	164941	8430.96	SCG2
5	A5	56	76.2066	162124	8306.08	SCG2
5	A5	57	76.5012	160540	8197.53	SCG2
5	A5	58	76.7959	157842	8112.73	SCG2
5	A5	59	77.0905	155352	8050.93	SCG2
5	A5	60	77.3851	153163	8003.87	SCG2
5	A5	61	77.6798	150109	7961.9	SCG2
5	A5	62	77.9744	147868	7923.7	SCG2
5	A5	63	78.2691	145185	7906.34	SCG2
5	A5	64	78.5637	142959	7953.82	SCG2
5	A5	65	78.8583	141525	8149.21	SCG2
5	A5	66	79.153	138251	8635.31	SCG2
5	A5	67	79.4476	135840	9517.74	SCG2
5	A5	68	79.7422	132932	11060.5	SCG2
5	A5	69	80.0369	132022	13673.1	SCG2
5	A5	70	80.3315	128213	17715.4	SCG2
5	A5	71	80.6261	124512	23399.1	SCG2
5	A5	72	80.9208	118276	30582.9	SCG2
5	A5	73	81.2154	109357	38598.1	SCG2
5	A5	74	81.51	93569.3	46223.6	SCG2
5	A5	75	81.8047	61505.3	51914.8	SCG2
5	A5	76	82.0993	20198.6	54267.2	SCG2
5	A5	77	82.394	-14151.6	52540.2	SCG2
5	A5	78	82.6886	-29049.4	46979.9	SCG2
5	A5	79	82.9832	-32755	38752	SCG2
5	A5	80	83.2779	-33929.1	29509.4	SCG2
5	A5	81	83.5725	-32931.6	20818.9	SCG2
5	A5	82	83.8671	-33212.7	13722.7	SCG2
5	A5	83	84.1618	-34204.2	8526.53	SCG2
5	A5	84	84.4564	-34543	4506.44	SCG2
5	A5	85	84.7511	-34657.4	2159.85	SCG2
5	A5	86	85.0457	-34072.2	915.931	SCG2
5	A5	87	85.3403	-34795.8	320.536	SCG2
5	A5	88	85.635	-34847	75.3135	SCG2
5	A5	89	85.9296	-34287.8	5.97754	SCG2
5	A5	90	86.2242	-35504.6	13.5459	SCG2
5	A5	91	86.5189	-35415.6	39.0059	SCG2
5	A5	92	86.8135	-35272.7	47.9326	SCG2
5	A5	93	87.1081	-36523.3	27.7305	SCG2
5	A5	94	87.4028	-35527.4	-13.4268	SCG2
5	A5	95	87.6974	-36015.9	-53.4805	SCG2
5	A5	96	87.9921	-35576	-69.7295	SCG2
5	A5	97	88.2867	-35688.8	-52.4561	SCG2
5	A5	98	88.5813	-36809	-10.9023	SCG2
5	A5	99	88.876	-36644.1	32.3125	SCG2
5	A5	100	89.1706	-36600	54.6006	SCG2
5	A5	101	89.4652	-37700.4	45.583	SCG2
5	A5	102	89.7599	-36530.3	10.4336	SCG2
5	A5	103	90.0545	-37144.5	-36.2988	SCG2
5	A5	104	90.3491	-37370	-80.374	SCG2
5	A5	105	90.6438	-37479.4	-113.745	SCG2
5	A5	106	90.9384	-37800.6	-133.944	SCG2
5	A5	107	91.233	-37574.1	-140.185	SCG2
5	A5	108	91.5277	-37079.4	-131.099	SCG2
5	A5	109	91.8223	-38465.3	-106.061	SCG2
5	A5	110	92.117	-37898.7	-68.042	SCG2
5	A5	111	92.4116	-38205	-25.3145	SCG2
5	A5	112	92.7062	-38364.7	8.95215	SCG2
5	A5	113	93.0009	-38146.8	19.1875	SCG2
5	A5	114	93.2955	-39613.2	-7.42773	SCG2
5	A5	115	93.5901	-39513.6	-73.6729	SCG2
5	A5	116	93.8848	-38532.9	-166.95	SCG2
5	A5	117	94.1794	-38645.7	-261.66	SCG2
5	A5	118	94.474	-39244.1	-330.606	SCG2
5	A5	119	94.7687	-38320.6	-358.816	SCG2
6	A6	1	60.0016	302624	9280.13	SCG2
6	A6	2	60.2962	300609	9348.45	SCG2
6	A6	3	60.5909	299048	9417.51	SCG2
6	A6	4	60.8855	295288	9470.63	SCG2
6	A6	5	61.1801	292494	9498.91	SCG2
6	A6	6	61.4748	289800	9504.38	SCG2
6	A6	7	61.7694	286857	9497.1	SCG2
6	A6	8	62.0641	283858	9488.83	SCG2
6	A6	9	62.3587	280822	9487.54	SCG2
6	A6	10	62.6533	278398	9495.28	SCG2
6	A6	11	62.948	274753	9509.22	SCG2
6	A6	12	63.2426	271910	9523.47	SCG2
6	A6	13	63.5372	268859	9530.76	SCG2
6	A6	14	63.8319	265958	9523.14	SCG2
6	A6	15	64.1265	263304	9494.25	SCG2
6	A6	16	64.4211	259275	9442.52	SCG2
6	A6	17	64.7158	256973	9373.62	SCG2
6	A6	18	65.0104	253440	9299.26	SCG2
6	A6	19	65.3051	250638	9232.17	SCG2
6	A6	20	65.5997	248320	9179.66	SCG2
6	A6	21	65.8943	245447	9140.95	SCG2
6	A6	22	66.189	242593	9109.98	SCG2
6	A6	23	66.4836	238601	9081.87	SCG2
6	A6	24	66.7782	236869	9056.75	SCG2
6	A6	25	67.0729	233285	9039	SCG2
6	A6	26	67.3675	231929	9032.01	SCG2
6	A6	27	67.6621	227604	9034.02	SCG2
6	A6	28	67.9568	225443	9037.43	SCG2
6	A6	29	68.2514	222624	9031.97	SCG2
6	A6	30	68.5461	219439	9009.28	SCG2
6	A6	31	68.8407	216775	8966.15	SCG2
6	A6	32	69.1353	213471	8905.21	SCG2
6	A6	33	69.43	211367	8833.11	SCG2
6	A6	34	69.7246	208626	8757.86	SCG2
6	A6	35	70.0192	205688	8687.21	SCG2
6	A6	36	70.3139	202898	8628.1	SCG2
6	A6	37	70.6085	201232	8570.74	SCG2
6	A6	38	70.9031	197265	8542.33	SCG2
6	A6	39	71.1978	195959	8543.06	SCG2
6	A6	40	71.4924	193343	8565.4	SCG2
6	A6	41	71.787	190457	8598.28	SCG2
6	A6	42	72.0817	187204	8631.31	SCG2
6	A6	43	72.3763	184348	8657.23	SCG2
6	A6	44	72.671	183012	8686.84	SCG2
6	A6	45	72.9656	180004	8721.73	SCG2
6	A6	46	73.2602	176933	8758.03	SCG2
6	A6	47	73.5549	174055	8786.83	SCG2
6	A6	48	73.8495	171463	8798.5	SCG2
6	A6	49	74.1441	169363	8787.56	SCG2
6	A6	50	74.4388	165808	8755.01	SCG2
6	A6	51	74.7334	163186	8706.69	SCG2
6	A6	52	75.0281	160775	8649.02	SCG2
6	A6	53	75.3227	159010	8567.98	SCG2
6	A6	54	75.6173	155465	8464.33	SCG2
6	A6	55	75.912	153106	8339.77	SCG2
6	A6	56	76.2066	150277	8191.84	SCG2
6	A6	57	76.5012	147825	8028.3	SCG2
6	A6	58	76.7959	145742	7864.74	SCG2
6	A6	59	77.0905	144198	7716.4	SCG2
6	A6	60	77.3851	141464	7591	SCG2
6	A6	61	77.6798	138267	7489.59	SCG2
6	A6	62	77.9744	136928	7415.13	SCG2
6	A6	63	78.2691	134731	7384.76	SCG2
6	A6	64	78.5637	132414	7442.71	SCG2
6	A6	65	78.8583	129863	7673.97	SCG2
6	A6	66	79.153	128046	8222.6	SCG2
6	A6	67	79.4476	126710	9119.34	SCG2
6	A6	68	79.7422	123568	10523.2	SCG2
6	A6	69	80.0369	120735	12840.3	SCG2
6	A6	70	80.3315	118020	16359.7	SCG2
6	A6	71	80.6261	114505	21239.6	SCG2
6	A6	72	80.9208	109127	27330.8	SCG2
6	A6	73	81.2154	99874.1	34030.4	SCG2
6	A6	74	81.51	82334.8	40276.3	SCG2
6	A6	75	81.8047	50989.6	44764.6	SCG2
6	A6	76	82.0993	10570.4	46357.6	SCG2
6	A6	77	82.394	-20172.3	44518.6	SCG2
6	A6	78	82.6886	-33133.9	39550.2	SCG2
6	A6	79	82.9832	-35368.7	32497.2	SCG2
6	A6	80	83.2779	-36145.5	24759.3	SCG2
6	A6	81	83.5725	-35764.4	17614.5	SCG2
6	A6	82	83.8671	-36404.9	11878	SCG2
6	A6	83	84.1618	-35932.9	7488.94	SCG2
6	A6	84	84.4564	-36191.1	3909.19	SCG2
6	A6	85	84.7511	-36357.4	1891.68	SCG2
6	A6	86	85.0457	-36633.6	868.33	SCG2
6	A6	87	85.3403	-36840.7	387.966	SCG2
6	A6	88	85.635	-37177.4	158.722	SCG2
6	A6	89	85.9296	-37155.7	25.5811	SCG2
6	A6	90	86.2242	-37524.1	-74.3545	SCG2
6	A6	91	86.5189	-36905.1	-154.536	SCG2
6	A6	92	86.8135	-36826.6	-210.655	SCG2
6	A6	93	87.1081	-37628.7	-239.656	SCG2
6	A6	94	87.4028	-36759.4	-246.573	SCG2
6	A6	95	87.6974	-37760.1	-241.681	SCG2
6	A6	96	87.9921	-37614.6	-233.165	SCG2
6	A6	97	88.2867	-37183.6	-221.828	SCG2
6	A6	98	88.5813	-37083.8	-201.888	SCG2
6	A6	99	88.876	-37848.6	-167.088	SCG2
6	A6	100	89.1706	-37562.7	-117.647	SCG2
6	A6	101	89.4652	-37197.3	-63.5879	SCG2
6	A6	102	89.7599	-38569.4	-22.6465	SCG2
6	A6	103	90.0545	-37665.9	-13.7959	SCG2
6	A6	104	90.3491	-38791.8	-48.918	SCG2
6	A6	105	90.6438	-38212.1	-125.965	SCG2
6	A6	106	90.9384	-38431.8	-226.928	SCG2
6	A6	107	91.233	-37915.5	-322.617	SCG2
6	A6	108	91.5277	-37978.6	-383.143	SCG2
6	A6	109	91.8223	-37877.5	-389.872	SCG2
6	A6	110	92.117	-37803.1	-343.426	SCG2
6	A6	111	92.4116	-38289.8	-263.933	SCG2
6	A6	112	92.7062	-38196	-183.189	SCG2
6	A6	113	93.0009	-38872.5	-131.883	SCG2
6	A6	114	93.2955	-38702	-127.303	SCG2
6	A6	115	93.5901	-38739.3	-167.126	SCG2
6	A6	116	93.8848	-38478.8	-232.307	SCG2
6	A6	117	94.1794	-38174.1	-297.521	SCG2
6	A6	118	94.474	-38793.5	-343.339	SCG2
6	A6	119	94.7687	-38446.5	-363.446	SCG2
7	A7	1	60.0003	377385	9599.56	SCG2
7	A7	2	60.2947	375218	9701.23	SCG2
7	A7	3	60.589	372917	9794.59	SCG2
7	A7	4	60.8834	370245	9879.69	SCG2
7	A7	5	61.1777	367145	9950.54	SCG2
7	A7	6	61.4721	364139	10008.5	SCG2
7	A7	7	61.7664	361295	10060.3	SCG2
7	A7	8	62.0608	357741	10113	SCG2
7	A7	9	62.3552	355324	10169.4	SCG2
7	A7	10	62.6495	351439	10226.3	SCG2
7	A7	11	62.9439	348749	10275.8	SCG2
7	A7	12	63.2382	345046	10309.1	SCG2
7	A7	13	63.5326	341574	10320.3	SCG2
7	A7	14	63.827	339117	10309.1	SCG2
7	A7	15	64.1213	335004	10282.4	SCG2
7	A7	16	64.4157	331896	10251	SCG2
7	A7	17	64.71	328793	10225	SCG2
7	A7	18	65.0044	325649	10208.4	SCG2
7	A7	19	65.2987	323165	10196.3	SCG2
7	A7	20	65.5931	318894	10177.8	SCG2
7	A7	21	65.8875	315994	10142.9	SCG2
7	A7	22	66.1818	312388	10089	SCG2
7	A7	23	66.4762	309593	10023.2	SCG2
7	A7	24	66.7705	306228	9960.37	SCG2
7	A7	25	67.0649	303086	9915.86	SCG2
7	A7	26	67.3592	300212	9898.85	SCG2
7	A7	27	67.6536	297271	9906.63	SCG2
7	A7	28	67.948	294528	9924.89	SCG2
7	A7	29	68.2423	291006	9934.21	SCG2
7	A7	30	68.5367	287294	9920.21	SCG2
7	A7	31	68.831	284398	9881.56	SCG2
7	A7	32	69.1254	281269	9830.23	SCG2
7	A7	33	69.4198	278360	9783.58	SCG2
7	A7	34	69.7141	275153	9753.05	SCG2
7	A7	35	70.0085	273346	9737.51	SCG2
7	A7	36	70.3028	269839	9725.43	SCG2
7	A7	37	70.5972	265328	9704.4	SCG2
7	A7	38	70.8915	263182	9669.56	SCG2
7	A7	39	71.1859	260550	9618.4	SCG2
7	A7	40	71.4803	257615	9564.09	SCG2
7	A7	41	71.7746	254645	9522.42	SCG2
7	A7	42	72.069	251278	9501.62	SCG2
7	A7	43	72.3633	248481	9508.8	SCG2
7	A7	44	72.6577	245822	9551.83	SCG2
7	A7	45	72.952	242661	9636.27	SCG2
7	A7	46	73.2464	240458	9736.9	SCG2
7	A7	47	73.5408	236717	9851.16	SCG2
7	A7	48	73.8351	233884	9959.19	SCG2
7	A7	49	74.1295	230905	10032.4	SCG2
7	A7	50	74.4238	227267	10044.9	SCG2
7	A7	51	74.7182	223800	9981.79	SCG2
7	A7	52	75.0125	220898	9843.39	SCG2
7	A7	53	75.3069	217707	9643.4	SCG2
7	A7	54	75.6013	214388	9351.6	SCG2
7	A7	55	75.8956	212904	9058.17	SCG2
7	A7	56	76.19	209286	8798.97	SCG2
7	A7	57	76.4843	206477	8598.25	SCG2
7	A7	58	76.7787	205342	8463.88	SCG2
7	A7	59	77.0731	202235	8386.41	SCG2
7	A7	60	77.3674	199677	8344.97	SCG2
7	A7	61	77.6618	196628	8318.89	SCG2
7	A7	62	77.9561	193972	8301.16	SCG2
7	A7	63	78.2505	191968	8308.72	SCG2
7	A7	64	78.5448	189362	8387.47	SCG2
7	A7	65	78.8392	186446	8616.55	SCG2
7	A7	66	79.1336	184700	9118.59	SCG2
7	A7	67	79.4279	182417	9990.79	SCG2
7	A7	68	79.7223	178868	11331.5	SCG2
7	A7	69	80.0166	175755	13544.2	SCG2
7	A7	70	80.311	173527	16950.5	SCG2
7	A7	71	80.6053	168869	21790.1	SCG2
7	A7	72	80.8997	164203	28042.9	SCG2
7	A7	73	81.1941	156292	35247	SCG2
7	A7	74	81.4884	143509	42422.7	SCG2
7	A7	75	81.7828	119267	48210.3	SCG2
7	A7	76	82.0771	81409.5	51242.7	SCG2
7	A7	77	82.3715	42993.1	50629.8	SCG2
7	A7	78	82.6658	18162.4	46326.1	SCG2
7	A7	79	82.9602	10903.7	39179.8	SCG2
7	A7	80	83.2546	9248.87	30626	SCG2
7	A7	81	83.5489	8492.11	22180.6	SCG2
7	A7	82	83.8433	8970.37	14986.5	SCG2
7	A7	83	84.1376	8916.34	9580.57	SCG2
7	A7	84	84.432	8972.74	5044.46	SCG2
7	A7	85	84.7264	9068.23	2373.25	SCG2
7	A7	86	85.0207	9509.85	993.096	SCG2
7	A7	87	85.3151	9152.41	382.661	SCG2
7	A7	88	85.6094	8427.77	161.712	SCG2
7	A7	89	85.9038	8255.2	98.3066	SCG2
7	A7	90	86.1981	8327.44	76.2246	SCG2
7	A7	91	86.4925	8116.28	52.2617	SCG2
7	A7	92	86.7869	8556.2	18.8623	SCG2
7	A7	93	87.0812	7793.99	-20.9023	SCG2
7	A7	94	87.3756	7556.24	-64.7061	SCG2
7	A7	95	87.6699	8073.66	-112.081	SCG2
7	A7	96	87.9643	8071	-161.225	SCG2
7	A7	97	88.2587	7333.08	-206.348	SCG2
7	A7	98	88.553	7948.93	-237.8	SCG2
7	A7	99	88.8474	7593.59	-245.23	SCG2
7	A7	100	89.1417	8191.18	-223.132	SCG2
7	A7	101	89.4361	7864.51	-176.371	SCG2
7	A7	102	89.7304	7840.73	-121.524	SCG2
7	A7	103	90.0248	6711.43	-81.1074	SCG2
7	A7	104	90.3192	7166.33	-72.9951	SCG2
7	A7	105	90.6135	7343.5	-101.881	SCG2
7	A7	106	90.9079	7286.93	-158.538	SCG2
7	A7	107	91.2022	7256.18	-226.191	SCG2
7	A7	108	91.4966	6991.26	-288.098	SCG2
7	A7	109	91.7909	6959.12	-331.537	SCG2
7	A7	110	92.0853	7684.12	-348.803	SCG2
7	A7	111	92.3797	7196.94	-338.611	SCG2
7	A7	112	92.674	7723.64	-308.584	SCG2
7	A7	113	92.9684	6929.04	-275.025	SCG2
7	A7	114	93.2627	6557.01	-256.731	SCG2
7	A7	115	93.5571	6793.06	-265.225	SCG2
7	A7	116	93.8514	7401.24	-298.677	SCG2
7	A7	117	94.1458	7289.16	-344.645	SCG2
7	A7	118	94.4402	7039.91	-389.292	SCG2
7	A7	119	94.7345	6747.98	-425.479	SCG2
8	A8	1	60.0003	374505	9451.54	SCG2
8	A8	2	60.2947	371493	9513.28	SCG2
8	A8	3	60.589	369579	9570.65	SCG2
8	A8	4	60.8834	366713	9621.6	SCG2
8	A8	5	61.1777	364004	9670.73	SCG2
8	A8	6	61.4721	361142	9724.89	SCG2
8	A8	7	61.7664	358577	9786.33	SCG2
8	A8	8	62.0608	355781	9849.63	SCG2
8	A8	9	62.3552	352306	9904.69	SCG2
8	A8	10	62.6495	349068	9943.45	SCG2
8	A8	11	62.9439	345994	9964.3	SCG2
8	A8	12	63.2382	342699	9970.64	SCG2
8	A8	13	63.5326	339848	9966.2	SCG2
8	A8	14	63.827	336992	9951.12	SCG2
8	A8	15	64.1213	333867	9923.97	SCG2
8	A8	16	64.4157	330752	9887.63	SCG2
8	A8	17	64.71	326909	9852.41	SCG2
8	A8	18	65.0044	323747	9832.69	SCG2
8	A8	19	65.2987	322531	9837.64	SCG2
8	A8	20	65.5931	318395	9863.31	SCG2
8	A8	21	65.8875	315114	9892.51	SCG2
8	A8	22	66.1818	312975	9903.53	SCG2
8	A8	23	66.4762	308314	9881.09	SCG2
8	A8	24	66.7705	305679	9823.17	SCG2
8	A8	25	67.0649	303013	9739.76	SCG2
8	A8	26	67.3592	299715	9646.97	SCG2
8	A8	27	67.6536	296780	9560.65	SCG2
8	A8	28	67.948	294019	9492.3	SCG2
8	A8	29	68.2423	290811	9447.67	SCG2
8	A8	30	68.5367	287967	9426.42	SCG2
8	A8	31	68.831	285804	9422.46	SCG2
8	A8	32	69.1254	282244	9425.66	SCG2
8	A8	33	69.4198	279076	9425.57	SCG2
8	A8	34	69.7141	276722	9415.03	SCG2
8	A8	35	70.0085	273272	9392.48	SCG2
8	A8	36	70.3028	270557	9361.43	SCG2
8	A8	37	70.5972	268126	9328.54	SCG2
8	A8	38	70.8915	264765	9300.95	SCG2
8	A8	39	71.1859	261897	9283.96	SCG2
8	A8	40	71.4803	259507	9279.33	SCG2
8	A8	41	71.7746	256776	9284.51	SCG2
8	A8	42	72.069	253562	9294.01	SCG2
8	A8	43	72.3633	250344	9302.39	SCG2
8	A8	44	72.6577	248056	9306.78	SCG2
8	A8	45	72.952	245043	9307.21	SCG2
8	A8	46	73.2464	241929	9304.58	SCG2
8	A8	47	73.5408	239660	9297.93	SCG2
8	A8	48	73.8351	236272	9283.55	SCG2
8	A8	49	74.1295	233921	9253.98	SCG2
8	A8	50	74.4238	230951	9206.55	SCG2
8	A8	51	74.7182	227148	9144.81	SCG2
8	A8	52	75.0125	226016	9075.57	SCG2
8	A8	53	75.3069	222274	9005.27	SCG2
8	A8	54	75.6013	219739	8935.25	SCG2
8	A8	55	75.8956	217417	8860.06	SCG2
8	A8	56	76.19	214265	8770.33	SCG2
8	A8	57	76.4843	211619	8658.66	SCG2
8	A8	58	76.7787	208745	8524.68	SCG2
8	A8	59	77.0731	206796	8376.75	SCG2
8	A8	60	77.3674	204019	8229.97	SCG2
8	A8	61	77.6618	201131	8102.73	SCG2
8	A8	62	77.9561	199319	8014.22	SCG2
8	A8	63	78.2505	197225	7986.48	SCG2
8	A8	64	78.5448	194514	8054.09	SCG2
8	A8	65	78.8392	191828	8282.54	SCG2
8	A8	66	79.1336	189568	8794.48	SCG2
8	A8	67	79.4279	187585	9735.14	SCG2
8	A8	68	79.7223	184858	11323.1	SCG2
8	A8	69	80.0166	182170	13965	SCG2
8	A8	70	80.311	179255	18018.6	SCG2
8	A8	71	80.6053	175715	23708.3	SCG2
8	A8	72	80.8997	169438	30922.9	SCG2
8	A8	73	81.1941	162362	39028.6	SCG2
8	A8	74	81.4884	148462	46825	SCG2
8	A8	75	81.7828	121383	52754	SCG2
8	A8	76	82.0771	82321.8	55358.7	SCG2
8	A8	77	82.3715	46122.8	53823	SCG2
8	A8	78	82.6658	26409	48324.4	SCG2
8	A8	79	82.9602	21374	39996.8	SCG2
8	A8	80	83.2546	20322.2	30511.1	SCG2
8	A8	81	83.5489	21214.7	21490.7	SCG2
8	A8	82	83.8433	20000.9	14048.8	SCG2
8	A8	83	84.1376	20054.6	8531.99	SCG2
8	A8	84	84.432	19654.6	4512.9	SCG2
8	A8	85	84.7264	19922.6	2150.77	SCG2
8	A8	86	85.0207	19910.3	890.879	SCG2
8	A8	87	85.3151	19687.5	276.94	SCG2
8	A8	88	85.6094	19653.5	2.43457	SCG2
8	A8	89	85.9038	19625.5	-108.075	SCG2
8	A8	90	86.1981	19484.7	-141.379	SCG2
8	A8	91	86.4925	19540	-135.434	SCG2
8	A8	92	86.7869	19612.8	-107.753	SCG2
8	A8	93	87.0812	19499.8	-71.915	SCG2
8	A8	94	87.3756	19183	-43.2354	SCG2
8	A8	95	87.6699	18837.7	-35.7002	SCG2
8	A8	96	87.9643	18532.9	-54.8184	SCG2
8	A8	97	88.2587	19322.9	-92.9385	SCG2
8	A8	98	88.553	18449.9	-131.834	SCG2
8	A8	99	88.8474	19337.7	-152.305	SCG2
8	A8	100	89.1417	19001.8	-145.146	SCG2
8	A8	101	89.4361	18742.5	-116.655	SCG2
8	A8	102	89.7304	18454.1	-85.1377	SCG2
8	A8	103	90.0248	18567.4	-70.4814	SCG2
8	A8	104	90.3192	17953.4	-83.0117	SCG2
8	A8	105	90.6135	18344.4	-118.08	SCG2
8	A8	106	90.9079	18296.6	-159.599	SCG2
8	A8	107	91.2022	18685.6	-190.42	SCG2
8	A8	108	91.4966	18434.3	-203.176	SCG2
8	A8	109	91.7909	17914.8	-204.52	SCG2
8	A8	110	92.0853	18348	-209.653	SCG2
8	A8	111	92.3797	17437.2	-230.65	SCG2
8	A8	112	92.674	17993.8	-266.917	SCG2
8	A8	113	92.9684	18653.8	-304.712	SCG2
8	A8	114	93.2627	18037.6	-326.25	SCG2
8	A8	115	93.5571	18437.2	-321.627	SCG2
8	A8	116	93.8514	17806.3	-295.147	SCG2
8	A8	117	94.1458	18229.6	-262.237	SCG2
8	A8	118	94.4402	17749.9	-240.015	SCG2
8	A8	119	94.7345	17632.1	-238.376	SCG2
9	A9	1	60.001	333031	10057	SCG2
9	A9	2	60.2957	330606	10124.8	SCG2
9	A9	3	60.5904	327993	10186.8	SCG2
9	A9	4	60.8851	324885	10233.7	SCG2
9	A9	5	61.1798	322218	10268.4	SCG2
9	A9	6	61.4745	318577	10303.1	SCG2
9	A9	7	61.7692	315835	10351.3	SCG2
9	A9	8	62.0639	313002	10418.5	SCG2
9	A9	9	62.3586	309629	10497.7	SCG2
9	A9	10	62.6533	306106	10572.2	SCG2
9	A9	11	62.948	302720	10621.6	SCG2
9	A9	12	63.2427	299234	10630.5	SCG2
9	A9	13	63.5374	295910	10593.4	SCG2
9	A9	14	63.8321	292581	10517.2	SCG2
9	A9	15	64.1268	288880	10419.4	SCG2
9	A9	16	64.4215	285398	10322.2	SCG2
9	A9	17	64.7162	283027	10245.1	SCG2
9	A9	18	65.0108	280095	10198.9	SCG2
9	A9	19	65.3055	276255	10183.3	SCG2
9	A9	20	65.6002	273018	10189.8	SCG2
9	A9	21	65.8949	270192	10205	SCG2
9	A9	22	66.1896	267288	10215.3	SCG2
9	A9	23	66.4843	263347	10209.3	SCG2
9	A9	24	66.779	259946	10180.8	SCG2
9	A9	25	67.0737	257100	10130.6	SCG2
9	A9	26	67.3684	254415	10066.2	SCG2
9	A9	27	67.6631	249839	9999.63	SCG2
9	A9	28	67.9578	247521	9942.07	SCG2
9	A9	29	68.2525	244826	9898.37	SCG2
9	A9	30	68.5472	241808	9864.46	SCG2
9	A9	31	68.8419	238493	9826.52	SCG2
9	A9	32	69.1366	234718	9774.89	SCG2
9	A9	33	69.4313	232038	9711.09	SCG2
9	A9	34	69.726	229423	9645	SCG2
9	A9	35	70.0207	226014	9592.36	SCG2
9	A9	36	70.3154	223535	9566.89	SCG2
9	A9	37	70.6101	220495	9574.69	SCG2
9	A9	38	70.9048	217359	9613.29	SCG2
9	A9	39	71.1995	214558	9673.83	SCG2
9	A9	40	71.4942	211747	9745.09	SCG2
9	A9	41	71.7889	208546	9818.23	SCG2
9	A9	42	72.0836	204913	9884.25	SCG2
9	A9	43	72.3783	202334	9949.96	SCG2
9	A9	44	72.673	199383	10031.1	SCG2
9	A9	45	72.9677	195768	10138.7	SCG2
9	A9	46	73.2624	193132	10276.1	SCG2
9	A9	47	73.5571	190052	10433.6	SCG2
9	A9	48	73.8518	186709	10587.8	SCG2
9	A9	49	74.1465	183099	10707.7	SCG2
9	A9	50	74.4412	179296	10765.1	SCG2
9	A9	51	74.7359	175524	10744.1	SCG2
9	A9	52	75.0305	172866	10643.5	SCG2
9	A9	53	75.3252	168973	10472.8	SCG2
9	A9	54	75.6199	166199	10246.1	SCG2
9	A9	55	75.9146	163281	9979.49	SCG2
9	A9	56	76.2093	159040	9661.78	SCG2
9	A9	57	76.504	156993	9322.97	SCG2
9	A9	58	76.7987	154294	9019.14	SCG2
9	A9	59	77.0934	152379	8775.97	SCG2
9	A9	60	77.3881	150006	8604.76	SCG2
9	A9	61	77.6828	146151	8501.86	SCG2
9	A9	62	77.9775	144184	8457.26	SCG2
9	A9	63	78.2722	142089	8467.03	SCG2
9	A9	64	78.5669	138536	8544.93	SCG2
9	A9	65	78.8616	136858	8732.8	SCG2
9	A9	66	79.1563	134468	9117.17	SCG2
9	A9	67	79.451	130706	9854.13	SCG2
9	A9	68	79.7457	128317	10985.7	SCG2
9	A9	69	80.0404	125345	12929	SCG2
9	A9	70	80.3351	122978	16027.8	SCG2
9	A9	71	80.6298	119677	20559	SCG2
9	A9	72	80.9245	114387	26560.4	SCG2
9	A9	73	81.2192	106374	33649.2	SCG2
9	A9	74	81.5139	93661.5	40929.4	SCG2
9	A9	75	81.8086	70543.5	47092.5	SCG2
9	A9	76	82.1033	35640.2	50747.7	SCG2
9	A9	77	82.398	-1282.92	50890.7	SCG2
9	A9	78	82.6927	-25214.9	47304.2	SCG2
9	A9	79	82.9874	-32148.3	40676.1	SCG2
9	A9	80	83.2821	-33835.8	32357.9	SCG2
9	A9	81	83.5768	-33571.2	23881	SCG2
9	A9	82	83.8715	-34439.9	16472.3	SCG2
9	A9	83	84.1662	-34455	10781.7	SCG2
9	A9	84	84.4609	-34392.1	6323.91	SCG2
9	A9	85	84.7556	-35898.5	3462.75	SCG2
9	A9	86	85.0502	-35567.4	1851.88	SCG2
9	A9	87	85.3449	-35851.3	1017.09	SCG2
9	A9	88	85.6396	-35635.4	621.928	SCG2
9	A9	89	85.9343	-35497.9	463.278	SCG2
9	A9	90	86.229	-36540.7	427.133	SCG2
9	A9	91	86.5237	-36717.6	446.475	SCG2
9	A9	92	86.8184	-36391.1	477.987	SCG2
9	A9	93	87.1131	-37006.3	494.803	SCG2
9	A9	94	87.4078	-37631.3	485.839	SCG2
9	A9	95	87.7025	-37719.1	454.604	SCG2
9	A9	96	87.9972	-37011	414.686	SCG2
9	A9	97	88.2919	-37884.2	382.275	SCG2
9	A9	98	88.5866	-37804.8	368.22	SCG2
9	A9	99	88.8813	-38039.6	373.154	SCG2
9	A9	100	89.176	-38244	388.229	SCG2
9	A9	101	89.4707	-38911.8	400.813	SCG2
9	A9	102	89.7654	-38542.1	401.555	SCG2
9	A9	103	90.0601	-39037.4	388.798	SCG2
9	A9	104	90.3548	-39187.8	368.316	SCG2
9	A9	105	90.6495	-39345	348.987	SCG2
9	A9	106	90.9442	-38961.3	337.014	SCG2
9	A9	107	91.2389	-39703	331.987	SCG2
9	A9	108	91.5336	-40073.9	327.313	SCG2
9	A9	109	91.8283	-40131.9	314.862	SCG2
9	A9	110	92.123	-40202.4	290.693	SCG2
9	A9	111	92.4177	-39876	257.713	SCG2
9	A9	112	92.7124	-40815.7	223.619	SCG2
9	A9	113	93.0071	-40262.5	196.262	SCG2
9	A9	114	93.3018	-40785.7	180.017	SCG2
9	A9	115	93.5965	-40648.8	174.998	SCG2
9	A9	116	93.8912	-41156.5	178.249	SCG2
9	A9	117	94.1859	-40611.9	185.282	SCG2
9	A9	118	94.4806	-41322	191.318	SCG2
9	A9	119	94.7753	-41515.3	192.449	SCG2
10	A10	1	60.001	389277	10258.3	ACTIN
10	A10	2	60.2957	387220	10345.8	ACTIN
10	A10	3	60.5904	384228	10442.6	ACTIN
10	A10	4	60.8851	381633	10545.3	ACTIN
10	A10	5	61.1798	378829	10656.4	ACTIN
10	A10	6	61.4745	375473	10777.7	ACTIN
10	A10	7	61.7692	373208	10903	ACTIN
10	A10	8	62.0639	369688	11015.9	ACTIN
10	A10	9	62.3586	366068	11097	ACTIN
10	A10	10	62.6533	362620	11134.3	ACTIN
10	A10	11	62.948	359095	11129.6	ACTIN
10	A10	12	63.2427	355987	11095.4	ACTIN
10	A10	13	63.5374	352708	11048.3	ACTIN
10	A10	14	63.8321	349651	11000.4	ACTIN
10	A10	15	64.1268	346358	10957.6	ACTIN
10	A10	16	64.4215	342886	10920.8	ACTIN
10	A10	17	64.7162	339888	10888.7	ACTIN
10	A10	18	65.0108	336277	10859.2	ACTIN
10	A10	19	65.3055	333617	10827.3	ACTIN
10	A10	20	65.6002	330038	10785.4	ACTIN
10	A10	21	65.8949	326821	10724.2	ACTIN
10	A10	22	66.1896	323257	10637.2	ACTIN
10	A10	23	66.4843	320650	10526.4	ACTIN
10	A10	24	66.779	317074	10404.3	ACTIN
10	A10	25	67.0737	313568	10292.5	ACTIN
10	A10	26	67.3684	310766	10212.7	ACTIN
10	A10	27	67.6631	308337	10176.3	ACTIN
10	A10	28	67.9578	305805	10179.3	ACTIN
10	A10	29	68.2525	301412	10204.3	ACTIN
10	A10	30	68.5472	298413	10231	ACTIN
10	A10	31	68.8419	295802	10244.6	ACTIN
10	A10	32	69.1366	293104	10239.8	ACTIN
10	A10	33	69.4313	289046	10218.5	ACTIN
10	A10	34	69.726	286468	10186.5	ACTIN
10	A10	35	70.0207	283242	10150.6	ACTIN
10	A10	36	70.3154	280561	10115.8	ACTIN
10	A10	37	70.6101	277355	10083	ACTIN
10	A10	38	70.9048	274391	10049.2	ACTIN
10	A10	39	71.1995	271490	10009.3	ACTIN
10	A10	40	71.4942	268070	9959.54	ACTIN
10	A10	41	71.7889	265441	9900.7	ACTIN
10	A10	42	72.0836	262544	9836.89	ACTIN
10	A10	43	72.3783	259258	9773.17	ACTIN
10	A10	44	72.673	256609	9718.89	ACTIN
10	A10	45	72.9677	253949	9665.98	ACTIN
10	A10	46	73.2624	250583	9609.33	ACTIN
10	A10	47	73.5571	247785	9545.56	ACTIN
10	A10	48	73.8518	244954	9475.42	ACTIN
10	A10	49	74.1465	242503	9404.86	ACTIN
10	A10	50	74.4412	239395	9344.29	ACTIN
10	A10	51	74.7359	236908	9305.67	ACTIN
10	A10	52	75.0305	233776	9298.03	ACTIN
10	A10	53	75.3252	231995	9322.65	ACTIN
10	A10	54	75.6199	228315	9369.29	ACTIN
10	A10	55	75.9146	226147	9416.37	ACTIN
10	A10	56	76.2093	222811	9436.52	ACTIN
10	A10	57	76.504	220144	9406.85	ACTIN
10	A10	58	76.7987	216440	9318.92	ACTIN
10	A10	59	77.0934	214328	9183.76	ACTIN
10	A10	60	77.3881	211779	9029.11	ACTIN
10	A10	61	77.6828	208775	8890.31	ACTIN
10	A10	62	77.9775	207179	8799.88	ACTIN
10	A10	63	78.2722	203675	8778.12	ACTIN
10	A10	64	78.5669	201717	8827.17	ACTIN
10	A10	65	78.8616	199203	8928.08	ACTIN
10	A10	66	79.1563	196789	9042.8	ACTIN
10	A10	67	79.451	193375	9123.47	ACTIN
10	A10	68	79.7457	190006	9128.18	ACTIN
10	A10	69	80.0404	186995	9037.56	ACTIN
10	A10	70	80.3351	184539	8863.59	ACTIN
10	A10	71	80.6298	182395	8645.56	ACTIN
10	A10	72	80.9245	179724	8436.43	ACTIN
10	A10	73	81.2192	177140	8286.67	ACTIN
10	A10	74	81.5139	175731	8233.57	ACTIN
10	A10	75	81.8086	173110	8300.06	ACTIN
10	A10	76	82.1033	170178	8501.95	ACTIN
10	A10	77	82.398	167841	8861.8	ACTIN
10	A10	78	82.6927	165870	9426.27	ACTIN
10	A10	79	82.9874	162481	10366.2	ACTIN
10	A10	80	83.2821	159450	11870.7	ACTIN
10	A10	81	83.5768	156526	14129	ACTIN
10	A10	82	83.8715	153089	17424.5	ACTIN
10	A10	83	84.1662	148820	22001.5	ACTIN
10	A10	84	84.4609	143996	27936.6	ACTIN
10	A10	85	84.7556	136959	34992.4	ACTIN
10	A10	86	85.0502	123990	42520.4	ACTIN
10	A10	87	85.3449	106900	49482	ACTIN
10	A10	88	85.6396	78856	54629.4	ACTIN
10	A10	89	85.9343	47936.1	56819.2	ACTIN
10	A10	90	86.229	23357.7	55366.6	ACTIN
10	A10	91	86.5237	14901.5	50302.8	ACTIN
10	A10	92	86.8184	12018.9	42416.9	ACTIN
10	A10	93	87.1131	11265.4	33038.8	ACTIN
10	A10	94	87.4078	10804.4	23639.4	ACTIN
10	A10	95	87.7025	10931.7	15415.9	ACTIN
10	A10	96	87.9972	10649.8	9132.39	ACTIN
10	A10	97	88.2919	10441	5298.17	ACTIN
10	A10	98	88.5866	10295	2902.03	ACTIN
10	A10	99	88.8813	10166.4	1550.58	ACTIN
10	A10	100	89.176	10502.7	862.777	ACTIN
10	A10	101	89.4707	9935.12	548.312	ACTIN
10	A10	102	89.7654	9916.07	418.18	ACTIN
10	A10	103	90.0601	9836.68	362.007	ACTIN
10	A10	104	90.3548	9613.78	321.194	ACTIN
10	A10	105	90.6495	8745.32	270.347	ACTIN
10	A10	106	90.9442	10038.7	206.095	ACTIN
10	A10	107	91.2389	9651.73	137.909	ACTIN
10	A10	108	91.5336	9221.55	78.3877	ACTIN
10	A10	109	91.8283	9647.76	35.1025	ACTIN
10	A10	110	92.123	9566.77	7.30762	ACTIN
10	A10	111	92.4177	9039.87	-11.7852	ACTIN
10	A10	112	92.7124	9733.77	-29.9395	ACTIN
10	A10	113	93.0071	9315.83	-51.7852	ACTIN
10	A10	114	93.3018	9180.64	-77.7373	ACTIN
10	A10	115	93.5965	9891	-105.559	ACTIN
10	A10	116	93.8912	9207.95	-132.989	ACTIN
10	A10	117	94.1859	9908.23	-159.754	ACTIN
10	A10	118	94.4806	9257.29	-187.916	ACTIN
10	A10	119	94.7753	9352.92	-220.439	ACTIN
11	A11	1	60.0011	433229	11471.5	ACTIN
11	A11	2	60.2952	431044	11580.3	ACTIN
11	A11	3	60.5893	428156	11670.9	ACTIN
11	A11	4	60.8834	423959	11734.3	ACTIN
11	A11	5	61.1774	420868	11778.6	ACTIN
11	A11	6	61.4715	418340	11820.4	ACTIN
11	A11	7	61.7656	415050	11872.1	ACTIN
11	A11	8	62.0597	411852	11933.8	ACTIN
11	A11	9	62.3538	407021	11995.6	ACTIN
11	A11	10	62.6479	404423	12044.7	ACTIN
11	A11	11	62.942	400543	12070.4	ACTIN
11	A11	12	63.236	397561	12066.6	ACTIN
11	A11	13	63.5301	393225	12031.7	ACTIN
11	A11	14	63.8242	389774	11968.5	ACTIN
11	A11	15	64.1183	386554	11883.5	ACTIN
11	A11	16	64.4124	382977	11784.7	ACTIN
11	A11	17	64.7065	379635	11678.7	ACTIN
11	A11	18	65.0006	375975	11569.7	ACTIN
11	A11	19	65.2946	372932	11459.7	ACTIN
11	A11	20	65.5887	368910	11350.9	ACTIN
11	A11	21	65.8828	366168	11247.3	ACTIN
11	A11	22	66.1769	362620	11156.1	ACTIN
11	A11	23	66.471	359351	11087.5	ACTIN
11	A11	24	66.7651	355681	11051.9	ACTIN
11	A11	25	67.0592	352862	11054.2	ACTIN
11	A11	26	67.3532	350171	11089	ACTIN
11	A11	27	67.6473	346335	11139.1	ACTIN
11	A11	28	67.9414	342926	11181.4	ACTIN
11	A11	29	68.2355	339540	11197.2	ACTIN
11	A11	30	68.5296	336524	11179.9	ACTIN
11	A11	31	68.8237	332018	11136.8	ACTIN
11	A11	32	69.1178	329795	11081.5	ACTIN
11	A11	33	69.4118	326498	11023.7	ACTIN
11	A11	34	69.7059	323459	10962.6	ACTIN
11	A11	35	70	319871	10891	ACTIN
11	A11	36	70.2941	316530	10804.2	ACTIN
11	A11	37	70.5882	312640	10706.9	ACTIN
11	A11	38	70.8823	310425	10611.2	ACTIN
11	A11	39	71.1764	308031	10526.2	ACTIN
11	A11	40	71.4705	303834	10451.2	ACTIN
11	A11	41	71.7645	301687	10377.8	ACTIN
11	A11	42	72.0586	297174	10299.6	ACTIN
11	A11	43	72.3527	294500	10221.2	ACTIN
11	A11	44	72.6468	292550	10160.3	ACTIN
11	A11	45	72.9409	288687	10130.9	ACTIN
11	A11	46	73.235	285941	10133.3	ACTIN
11	A11	47	73.5291	283259	10158.3	ACTIN
11	A11	48	73.8231	280470	10186.7	ACTIN
11	A11	49	74.1172	276911	10199.4	ACTIN
11	A11	50	74.4113	273470	10182.2	ACTIN
11	A11	51	74.7054	270532	10142.4	ACTIN
11	A11	52	74.9995	268497	10087.9	ACTIN
11	A11	53	75.2936	265019	10026.7	ACTIN
11	A11	54	75.5877	262160	9960.3	ACTIN
11	A11	55	75.8817	258969	9885.26	ACTIN
11	A11	56	76.1758	255996	9800.23	ACTIN
11	A11	57	76.4699	252990	9709.91	ACTIN
11	A11	58	76.764	250854	9624.17	ACTIN
11	A11	59	77.0581	247711	9553.57	ACTIN
11	A11	60	77.3522	245224	9506.24	ACTIN
11	A11	61	77.6463	241708	9487.29	ACTIN
11	A11	62	77.9404	239548	9498.99	ACTIN
11	A11	63	78.2344	236416	9537.97	ACTIN
11	A11	64	78.5285	234760	9591.26	ACTIN
11	A11	65	78.8226	230568	9635.38	ACTIN
11	A11	66	79.1167	228629	9642.46	ACTIN
11	A11	67	79.4108	224588	9592.25	ACTIN
11	A11	68	79.7049	221681	9481.83	ACTIN
11	A11	69	79.999	219393	9328.33	ACTIN
11	A11	70	80.293	216580	9162.52	ACTIN
11	A11	71	80.5871	213973	9017.28	ACTIN
11	A11	72	80.8812	211248	8918.83	ACTIN
11	A11	73	81.1753	208845	8882.72	ACTIN
11	A11	74	81.4694	206447	8917.36	ACTIN
11	A11	75	81.7635	204161	9032.67	ACTIN
11	A11	76	82.0576	200620	9252.6	ACTIN
11	A11	77	82.3516	197782	9628.29	ACTIN
11	A11	78	82.6457	196413	10258	ACTIN
11	A11	79	82.9398	193229	11388.3	ACTIN
11	A11	80	83.2339	189550	13168.7	ACTIN
11	A11	81	83.528	187157	15870.8	ACTIN
11	A11	82	83.8221	182700	19774.6	ACTIN
11	A11	83	84.1162	178468	25069.3	ACTIN
11	A11	84	84.4102	173797	31706	ACTIN
11	A11	85	84.7043	166752	39254.9	ACTIN
11	A11	86	84.9984	153041	46847.3	ACTIN
11	A11	87	85.2925	133870	53273.4	ACTIN
11	A11	88	85.5866	105268	57247.8	ACTIN
11	A11	89	85.8807	73467	57775.6	ACTIN
11	A11	90	86.1748	49389.2	54489.9	ACTIN
11	A11	91	86.4688	40415.7	47817.5	ACTIN
11	A11	92	86.7629	38022.4	38886.2	ACTIN
11	A11	93	87.057	37851.4	29188.3	ACTIN
11	A11	94	87.3511	37261.8	20137.2	ACTIN
11	A11	95	87.6452	36590	12703.3	ACTIN
11	A11	96	87.9393	36529.4	7588.07	ACTIN
11	A11	97	88.2334	36434.6	4418.4	ACTIN
11	A11	98	88.5275	35848	2550.05	ACTIN
11	A11	99	88.8215	35970.1	1553.89	ACTIN
11	A11	100	89.1156	35718.7	1064.97	ACTIN
11	A11	101	89.4097	34952.4	828.674	ACTIN
11	A11	102	89.7038	34842.6	694.551	ACTIN
11	A11	103	89.9979	34573.1	589.451	ACTIN
11	A11	104	90.292	34799.1	489.174	ACTIN
11	A11	105	90.5861	34430.1	395.263	ACTIN
11	A11	106	90.8801	34476.6	318.315	ACTIN
11	A11	107	91.1742	33908.3	267.732	ACTIN
11	A11	108	91.4683	35026	246.931	ACTIN
11	A11	109	91.7624	33868.3	252.729	ACTIN
11	A11	110	92.0565	33715.4	277.08	ACTIN
11	A11	111	92.3506	34086.4	309.391	ACTIN
11	A11	112	92.6447	33636.6	337.847	ACTIN
11	A11	113	92.9387	33692.5	350.001	ACTIN
11	A11	114	93.2328	33200.3	334.586	ACTIN
11	A11	115	93.5269	32654.4	286.025	ACTIN
11	A11	116	93.821	32823.8	209.583	ACTIN
11	A11	117	94.1151	33329.4	122.107	ACTIN
11	A11	118	94.4092	33394.1	45.4756	ACTIN
11	A11	119	94.7033	33265.2	-4.15137	ACTIN
12	A12	1	60.0011	378894	10918	ACTIN
12	A12	2	60.2952	376424	10989.5	ACTIN
12	A12	3	60.5893	373874	11064.1	ACTIN
12	A12	4	60.8834	370427	11125	ACTIN
12	A12	5	61.1774	367815	11163.2	ACTIN
12	A12	6	61.4715	364409	11176.6	ACTIN
12	A12	7	61.7656	361224	11166.1	ACTIN
12	A12	8	62.0597	357986	11132.3	ACTIN
12	A12	9	62.3538	354339	11075.9	ACTIN
12	A12	10	62.6479	351731	11001.3	ACTIN
12	A12	11	62.942	347485	10919.7	ACTIN
12	A12	12	63.236	344489	10847.7	ACTIN
12	A12	13	63.5301	341852	10800.4	ACTIN
12	A12	14	63.8242	338264	10783.3	ACTIN
12	A12	15	64.1183	335752	10787.9	ACTIN
12	A12	16	64.4124	331987	10794.6	ACTIN
12	A12	17	64.7065	329377	10783.3	ACTIN
12	A12	18	65.0006	325300	10743.5	ACTIN
12	A12	19	65.2946	321939	10679.9	ACTIN
12	A12	20	65.5887	319580	10608.8	ACTIN
12	A12	21	65.8828	315458	10549	ACTIN
12	A12	22	66.1769	313729	10513.3	ACTIN
12	A12	23	66.471	309531	10502.8	ACTIN
12	A12	24	66.7651	306535	10508	ACTIN
12	A12	25	67.0592	303756	10510.4	ACTIN
12	A12	26	67.3532	300491	10488.5	ACTIN
12	A12	27	67.6473	297461	10424.3	ACTIN
12	A12	28	67.9414	293843	10312.8	ACTIN
12	A12	29	68.2355	290367	10167.7	ACTIN
12	A12	30	68.5296	287279	10019.7	ACTIN
12	A12	31	68.8237	285713	9905.24	ACTIN
12	A12	32	69.1178	281749	9852.46	ACTIN
12	A12	33	69.4118	279285	9869.18	ACTIN
12	A12	34	69.7059	276655	9940.06	ACTIN
12	A12	35	70	273310	10032.8	ACTIN
12	A12	36	70.2941	270602	10109.7	ACTIN
12	A12	37	70.5882	267210	10141.4	ACTIN
12	A12	38	70.8823	263546	10115.9	ACTIN
12	A12	39	71.1764	260943	10040.6	ACTIN
12	A12	40	71.4705	258310	9935.01	ACTIN
12	A12	41	71.7645	255171	9821.18	ACTIN
12	A12	42	72.0586	252012	9714.67	ACTIN
12	A12	43	72.3527	249628	9622.35	ACTIN
12	A12	44	72.6468	246626	9551.46	ACTIN
12	A12	45	72.9409	243425	9493.94	ACTIN
12	A12	46	73.235	240576	9446.31	ACTIN
12	A12	47	73.5291	238509	9405.71	ACTIN
12	A12	48	73.8231	235728	9368.65	ACTIN
12	A12	49	74.1172	232245	9333.1	ACTIN
12	A12	50	74.4113	229481	9301.58	ACTIN
12	A12	51	74.7054	226892	9281.02	ACTIN
12	A12	52	74.9995	225184	9277.44	ACTIN
12	A12	53	75.2936	221134	9288.47	ACTIN
12	A12	54	75.5877	219063	9299.59	ACTIN
12	A12	55	75.8817	216526	9288.19	ACTIN
12	A12	56	76.1758	213221	9234.49	ACTIN
12	A12	57	76.4699	209599	9133.36	ACTIN
12	A12	58	76.764	207532	8999	ACTIN
12	A12	59	77.0581	205565	8860.9	ACTIN
12	A12	60	77.3522	202458	8752.91	ACTIN
12	A12	61	77.6463	200038	8702.53	ACTIN
12	A12	62	77.9404	197884	8723.11	ACTIN
12	A12	63	78.2344	194896	8810.41	ACTIN
12	A12	64	78.5285	192992	8942.05	ACTIN
12	A12	65	78.8226	190046	9079.93	ACTIN
12	A12	66	79.1167	187149	9178.78	ACTIN
12	A12	67	79.4108	184057	9199.9	ACTIN
12	A12	68	79.7049	180770	9125.84	ACTIN
12	A12	69	79.999	177959	8968.14	ACTIN
12	A12	70	80.293	175136	8763.61	ACTIN
12	A12	71	80.5871	173752	8560.38	ACTIN
12	A12	72	80.8812	170798	8402.6	ACTIN
12	A12	73	81.1753	168410	8321.35	ACTIN
12	A12	74	81.4694	165635	8334.66	ACTIN
12	A12	75	81.7635	163995	8454.4	ACTIN
12	A12	76	82.0576	161579	8696.4	ACTIN
12	A12	77	82.3516	158507	9093.79	ACTIN
12	A12	78	82.6457	156061	9726.44	ACTIN
12	A12	79	82.9398	153434	10802.7	ACTIN
12	A12	80	83.2339	149999	12473.8	ACTIN
12	A12	81	83.528	147860	15014.6	ACTIN
12	A12	82	83.8221	143675	18711.9	ACTIN
12	A12	83	84.1162	140117	23758.3	ACTIN
12	A12	84	84.4102	135205	30108.9	ACTIN
12	A12	85	84.7043	127743	37347.7	ACTIN
12	A12	86	84.9984	115881	44638	ACTIN
12	A12	87	85.2925	96588.2	50818	ACTIN
12	A12	88	85.5866	69008.2	54654.6	ACTIN
12	A12	89	85.8807	38353.3	55191.5	ACTIN
12	A12	90	86.1748	14513.7	52072	ACTIN
12	A12	91	86.4688	6464.95	45699.8	ACTIN
12	A12	92	86.7629	4133.83	37151.5	ACTIN
12	A12	93	87.057	3193.23	27857.6	ACTIN
12	A12	94	87.3511	3115.14	19178.2	ACTIN
12	A12	95	87.6452	3166.06	12051.2	ACTIN
12	A12	96	87.9393	2711.59	7130.93	ACTIN
12	A12	97	88.2334	2756	4075.62	ACTIN
12	A12	98	88.5275	2238.14	2267.07	ACTIN
12	A12	99	88.8215	1812.79	1280.07	ACTIN
12	A12	100	89.1156	1730.32	761.893	ACTIN
12	A12	101	89.4097	1644.69	479.821	ACTIN
12	A12	102	89.7038	1849.49	308.032	ACTIN
12	A12	103	89.9979	1775.27	189.348	ACTIN
12	A12	104	90.292	1694.73	100.007	ACTIN
12	A12	105	90.5861	1148.46	29.7686	ACTIN
12	A12	106	90.8801	1493.97	-24.5078	ACTIN
12	A12	107	91.1742	1631.5	-60.4424	ACTIN
12	A12	108	91.4683	1994.03	-73.751	ACTIN
12	A12	109	91.7624	1372.81	-64.2041	ACTIN
12	A12	110	92.0565	1722.43	-39.6934	ACTIN
12	A12	111	92.3506	1122.88	-15.0869	ACTIN
12	A12	112	92.6447	1665.24	-6.56055	ACTIN
12	A12	113	92.9387	1155.73	-24.8047	ACTIN
12	A12	114	93.2328	1172.69	-70.2207	ACTIN
12	A12	115	93.5269	940.549	-132.021	ACTIN
12	A12	116	93.821	1554.22	-192.162	ACTIN
12	A12	117	94.1151	2111.57	-233.341	ACTIN
12	A12	118	94.4092	1507.43	-247.394	ACTIN
12	A12	119	94.7033	1218.33	-238.845	ACTIN
13	B1	1	60.0009	391591	10590	SCG2
13	B1	2	60.2955	389224	10684.3	SCG2
13	B1	3	60.5901	386500	10783.6	SCG2
13	B1	4	60.8846	383151	10872.7	SCG2
13	B1	5	61.1792	379513	10943.1	SCG2
13	B1	6	61.4738	376814	10993.2	SCG2
13	B1	7	61.7684	373172	11026.5	SCG2
13	B1	8	62.063	369815	11048.1	SCG2
13	B1	9	62.3576	365740	11063.4	SCG2
13	B1	10	62.6521	362328	11076.1	SCG2
13	B1	11	62.9467	359215	11087	SCG2
13	B1	12	63.2413	356101	11093.2	SCG2
13	B1	13	63.5359	351640	11089.9	SCG2
13	B1	14	63.8305	348293	11073.8	SCG2
13	B1	15	64.125	345016	11046.1	SCG2
13	B1	16	64.4196	341654	11012.6	SCG2
13	B1	17	64.7142	337696	10980.7	SCG2
13	B1	18	65.0088	334740	10956.3	SCG2
13	B1	19	65.3034	330915	10940.8	SCG2
13	B1	20	65.5979	327460	10929.7	SCG2
13	B1	21	65.8925	324675	10914.9	SCG2
13	B1	22	66.1871	320458	10888	SCG2
13	B1	23	66.4817	316438	10845.5	SCG2
13	B1	24	66.7763	313937	10790.6	SCG2
13	B1	25	67.0709	310154	10732.1	SCG2
13	B1	26	67.3654	306677	10679.7	SCG2
13	B1	27	67.66	303232	10639.1	SCG2
13	B1	28	67.9546	300404	10608.6	SCG2
13	B1	29	68.2492	296420	10579.1	SCG2
13	B1	30	68.5438	293709	10536.9	SCG2
13	B1	31	68.8383	289541	10470.8	SCG2
13	B1	32	69.1329	286838	10377.6	SCG2
13	B1	33	69.4275	282255	10265.1	SCG2
13	B1	34	69.7221	280862	10149.6	SCG2
13	B1	35	70.0167	276706	10049.1	SCG2
13	B1	36	70.3112	273865	9977.17	SCG2
13	B1	37	70.6058	271290	9938.22	SCG2
13	B1	38	70.9004	267500	9927.95	SCG2
13	B1	39	71.195	265188	9935.63	SCG2
13	B1	40	71.4896	261423	9947.71	SCG2
13	B1	41	71.7842	258756	9951.21	SCG2
13	B1	42	72.0787	254993	9936.62	SCG2
13	B1	43	72.3733	252206	9899.85	SCG2
13	B1	44	72.6679	249351	9842.63	SCG2
13	B1	45	72.9625	245642	9763.78	SCG2
13	B1	46	73.2571	242587	9679.44	SCG2
13	B1	47	73.5517	240679	9600.06	SCG2
13	B1	48	73.8462	237122	9530.38	SCG2
13	B1	49	74.1408	233804	9469.28	SCG2
13	B1	50	74.4354	231730	9411.42	SCG2
13	B1	51	74.73	228271	9350.39	SCG2
13	B1	52	75.0246	225308	9281.28	SCG2
13	B1	53	75.3191	222612	9201.44	SCG2
13	B1	54	75.6137	220172	9110.52	SCG2
13	B1	55	75.9083	216768	9011.63	SCG2
13	B1	56	76.2029	213620	8912.17	SCG2
13	B1	57	76.4975	211693	8823.22	SCG2
13	B1	58	76.792	208948	8755.31	SCG2
13	B1	59	77.0866	206184	8713.97	SCG2
13	B1	60	77.3812	203595	8697.85	SCG2
13	B1	61	77.6758	200959	8702.74	SCG2
13	B1	62	77.9704	197379	8730.26	SCG2
13	B1	63	78.265	195597	8798.24	SCG2
13	B1	64	78.5595	192711	8952.82	SCG2
13	B1	65	78.8541	190235	9286.12	SCG2
13	B1	66	79.1487	187185	9947.99	SCG2
13	B1	67	79.4433	184219	11087	SCG2
13	B1	68	79.7379	181417	13098.6	SCG2
13	B1	69	80.0324	179110	16376.9	SCG2
13	B1	70	80.327	175408	21263.4	SCG2
13	B1	71	80.6216	170681	27855.6	SCG2
13	B1	72	80.9162	163635	35788.3	SCG2
13	B1	73	81.2108	152060	44099.2	SCG2
13	B1	74	81.5053	130917	51312.6	SCG2
13	B1	75	81.7999	93453.5	55800.9	SCG2
13	B1	76	82.0945	50838.7	56334.7	SCG2
13	B1	77	82.3891	24002.5	52574.8	SCG2
13	B1	78	82.6837	14398.4	45243.7	SCG2
13	B1	79	82.9783	12375.3	35867.1	SCG2
13	B1	80	83.2728	12674.2	26215.9	SCG2
13	B1	81	83.5674	12876.7	17733.5	SCG2
13	B1	82	83.862	12032.3	11204	SCG2
13	B1	83	84.1566	12240.6	6347.99	SCG2
13	B1	84	84.4512	11835.6	3269.24	SCG2
13	B1	85	84.7457	11823.5	1566	SCG2
13	B1	86	85.0403	11937.6	700.203	SCG2
13	B1	87	85.3349	11139.6	281.188	SCG2
13	B1	88	85.6295	11436.4	75.4033	SCG2
13	B1	89	85.9241	11481.3	-32.9639	SCG2
13	B1	90	86.2186	11555.7	-90.75	SCG2
13	B1	91	86.5132	11254.7	-114.077	SCG2
13	B1	92	86.8078	11590.7	-110.8	SCG2
13	B1	93	87.1024	11127.7	-89.3721	SCG2
13	B1	94	87.397	10785.9	-59.3545	SCG2
13	B1	95	87.6916	11759.7	-29.126	SCG2
13	B1	96	87.9861	10486	-4.60938	SCG2
13	B1	97	88.2807	10687.8	10.0088	SCG2
13	B1	98	88.5753	11149.1	10.8857	SCG2
13	B1	99	88.8699	10700.1	-5.4248	SCG2
13	B1	100	89.1645	10023.1	-39.3574	SCG2
13	B1	101	89.459	10411.3	-84.6406	SCG2
13	B1	102	89.7536	10437.1	-127.298	SCG2
13	B1	103	90.0482	11233.8	-150.264	SCG2
13	B1	104	90.3428	10353	-142.107	SCG2
13	B1	105	90.6374	10617.8	-103.853	SCG2
13	B1	106	90.9319	9839.34	-48.6162	SCG2
13	B1	107	91.2265	10262.3	5.33984	SCG2
13	B1	108	91.5211	10115	42.3486	SCG2
13	B1	109	91.8157	10168	52.9258	SCG2
13	B1	110	92.1103	9195.27	33.584	SCG2
13	B1	111	92.4049	10030.1	-13.2412	SCG2
13	B1	112	92.6994	8872.41	-77.4951	SCG2
13	B1	113	92.994	10267.4	-140.96	SCG2
13	B1	114	93.2886	9923.92	-181.748	SCG2
13	B1	115	93.5832	9671.88	-183.491	SCG2
13	B1	116	93.8778	9888.05	-143.81	SCG2
13	B1	117	94.1723	9657.48	-75.9932	SCG2
13	B1	118	94.4669	8833	-2.34961	SCG2
13	B1	119	94.7615	9238.32	56.5869	SCG2
14	B2	1	60.0009	375735	10971.3	SCG2
14	B2	2	60.2955	373324	11015.8	SCG2
14	B2	3	60.5901	370022	11058.8	SCG2
14	B2	4	60.8846	367612	11085.9	SCG2
14	B2	5	61.1792	362928	11093.4	SCG2
14	B2	6	61.4738	360600	11087	SCG2
14	B2	7	61.7684	357402	11074.6	SCG2
14	B2	8	62.063	353413	11059.3	SCG2
14	B2	9	62.3576	350616	11037.3	SCG2
14	B2	10	62.6521	347076	11002	SCG2
14	B2	11	62.9467	342250	10950.2	SCG2
14	B2	12	63.2413	340760	10886	SCG2
14	B2	13	63.5359	336297	10820.5	SCG2
14	B2	14	63.8305	332703	10767.5	SCG2
14	B2	15	64.125	330316	10738.7	SCG2
14	B2	16	64.4196	326846	10739.4	SCG2
14	B2	17	64.7142	323652	10767.2	SCG2
14	B2	18	65.0088	319863	10813.3	SCG2
14	B2	19	65.3034	316867	10863.8	SCG2
14	B2	20	65.5979	313383	10903.3	SCG2
14	B2	21	65.8925	310381	10918	SCG2
14	B2	22	66.1871	305989	10900.5	SCG2
14	B2	23	66.4817	302721	10852.4	SCG2
14	B2	24	66.7763	299355	10783	SCG2
14	B2	25	67.0709	296477	10705	SCG2
14	B2	26	67.3654	292900	10629.1	SCG2
14	B2	27	67.66	289730	10561.1	SCG2
14	B2	28	67.9546	285963	10504	SCG2
14	B2	29	68.2492	283228	10460	SCG2
14	B2	30	68.5438	280178	10431.7	SCG2
14	B2	31	68.8383	276281	10421	SCG2
14	B2	32	69.1329	273465	10425.3	SCG2
14	B2	33	69.4275	270925	10435.7	SCG2
14	B2	34	69.7221	267012	10438.5	SCG2
14	B2	35	70.0167	263933	10421.9	SCG2
14	B2	36	70.3112	260085	10380.8	SCG2
14	B2	37	70.6058	257254	10316.4	SCG2
14	B2	38	70.9004	254296	10254.6	SCG2
14	B2	39	71.195	251584	10214.7	SCG2
14	B2	40	71.4896	248229	10206.7	SCG2
14	B2	41	71.7842	245031	10229.6	SCG2
14	B2	42	72.0787	242065	10277.4	SCG2
14	B2	43	72.3733	238510	10347.2	SCG2
14	B2	44	72.6679	235441	10434	SCG2
14	B2	45	72.9625	232447	10541.9	SCG2
14	B2	46	73.2571	229410	10681.8	SCG2
14	B2	47	73.5517	226077	10847.8	SCG2
14	B2	48	73.8462	222338	11020.5	SCG2
14	B2	49	74.1408	219573	11168.4	SCG2
14	B2	50	74.4354	215593	11255.5	SCG2
14	B2	51	74.73	211557	11249.9	SCG2
14	B2	52	75.0246	208042	11135.2	SCG2
14	B2	53	75.3191	204525	10916.2	SCG2
14	B2	54	75.6137	201097	10620.2	SCG2
14	B2	55	75.9083	197951	10269.2	SCG2
14	B2	56	76.2029	195072	9884.94	SCG2
14	B2	57	76.4975	192855	9552.76	SCG2
14	B2	58	76.792	190634	9289.62	SCG2
14	B2	59	77.0866	186763	9088.83	SCG2
14	B2	60	77.3812	184082	8930.04	SCG2
14	B2	61	77.6758	182008	8792.64	SCG2
14	B2	62	77.9704	179128	8666.83	SCG2
14	B2	63	78.265	175893	8560.31	SCG2
14	B2	64	78.5595	174166	8504.21	SCG2
14	B2	65	78.8541	171475	8564.13	SCG2
14	B2	66	79.1487	168979	8860.05	SCG2
14	B2	67	79.4433	165857	9590.57	SCG2
14	B2	68	79.7379	164046	10941.5	SCG2
14	B2	69	80.0324	162237	13085.4	SCG2
14	B2	70	80.327	158621	16481.2	SCG2
14	B2	71	80.6216	154951	21345.5	SCG2
14	B2	72	80.9162	150490	27608.6	SCG2
14	B2	73	81.2108	142226	34746.6	SCG2
14	B2	74	81.5053	129545	41729.8	SCG2
14	B2	75	81.7999	104754	47186.6	SCG2
14	B2	76	82.0945	68345	49794.5	SCG2
14	B2	77	82.3891	34247.9	48761.9	SCG2
14	B2	78	82.6837	15842.5	44164.7	SCG2
14	B2	79	82.9783	12390.4	36946.7	SCG2
14	B2	80	83.2728	12217.7	28569.1	SCG2
14	B2	81	83.5674	10954.4	20490.9	SCG2
14	B2	82	83.862	10867.6	13740.8	SCG2
14	B2	83	84.1566	10808.6	8422.94	SCG2
14	B2	84	84.4512	10158.7	4451.34	SCG2
14	B2	85	84.7457	10060.4	2055.29	SCG2
14	B2	86	85.0403	9807.44	732.634	SCG2
14	B2	87	85.3349	11399.1	68.084	SCG2
14	B2	88	85.6295	10088.9	-221.181	SCG2
14	B2	89	85.9241	10354.8	-306.676	SCG2
14	B2	90	86.2186	10568.6	-288.606	SCG2
14	B2	91	86.5132	9945.57	-228.403	SCG2
14	B2	92	86.8078	10313.5	-167.488	SCG2
14	B2	93	87.1024	9840.33	-134.662	SCG2
14	B2	94	87.397	9279.21	-145.625	SCG2
14	B2	95	87.6916	9034.6	-199.23	SCG2
14	B2	96	87.9861	9924.31	-276.933	SCG2
14	B2	97	88.2807	9842.91	-350.273	SCG2
14	B2	98	88.5753	10047.6	-394.903	SCG2
14	B2	99	88.8699	9553.18	-402.842	SCG2
14	B2	100	89.1645	9555.47	-384.566	SCG2
14	B2	101	89.459	9319.84	-359.841	SCG2
14	B2	102	89.7536	8985.81	-344.546	SCG2
14	B2	103	90.0482	10218.1	-342.681	SCG2
14	B2	104	90.3428	9007.82	-347.079	SCG2
14	B2	105	90.6374	9220.31	-345.819	SCG2
14	B2	106	90.9319	9141.5	-329.302	SCG2
14	B2	107	91.2265	9668.88	-295.506	SCG2
14	B2	108	91.5211	9658.44	-252.7	SCG2
14	B2	109	91.8157	8527.59	-217.967	SCG2
14	B2	110	92.1103	8101.47	-209.949	SCG2
14	B2	111	92.4049	9019.36	-238.139	SCG2
14	B2	112	92.6994	8841.43	-295.705	SCG2
14	B2	113	92.994	8688.16	-361.802	SCG2
14	B2	114	93.2886	9275.29	-412.192	SCG2
14	B2	115	93.5832	8264.01	-430.761	SCG2
14	B2	116	93.8778	9044.89	-415.051	SCG2
14	B2	117	94.1723	9235.89	-374.62	SCG2
14	B2	118	94.4669	8231.19	-325.28	SCG2
14	B2	119	94.7615	8152.41	-282.657	SCG2
15	B3	1	60.0016	368395	10422.9	SCG2
15	B3	2	60.2958	365172	10453.8	SCG2
15	B3	3	60.59	362635	10483.7	SCG2
15	B3	4	60.8842	360501	10503.5	SCG2
15	B3	5	61.1783	356584	10512	SCG2
15	B3	6	61.4725	353187	10515.7	SCG2
15	B3	7	61.7667	350615	10523.5	SCG2
15	B3	8	62.0609	346965	10540.8	SCG2
15	B3	9	62.3551	344085	10566.2	SCG2
15	B3	10	62.6493	340659	10591.2	SCG2
15	B3	11	62.9435	336579	10605.3	SCG2
15	B3	12	63.2376	334009	10599	SCG2
15	B3	13	63.5318	330156	10567.1	SCG2
15	B3	14	63.826	326594	10509.3	SCG2
15	B3	15	64.1202	323885	10431.8	SCG2
15	B3	16	64.4144	320336	10346.9	SCG2
15	B3	17	64.7086	315939	10271.2	SCG2
15	B3	18	65.0028	314362	10219.6	SCG2
15	B3	19	65.2969	310306	10199.5	SCG2
15	B3	20	65.5911	308310	10206.2	SCG2
15	B3	21	65.8853	303771	10225.9	SCG2
15	B3	22	66.1795	301084	10242.1	SCG2
15	B3	23	66.4737	297944	10243.7	SCG2
15	B3	24	66.7679	293938	10227.6	SCG2
15	B3	25	67.0621	291055	10197	SCG2
15	B3	26	67.3562	288130	10156.3	SCG2
15	B3	27	67.6504	284742	10107.1	SCG2
15	B3	28	67.9446	281785	10049.2	SCG2
15	B3	29	68.2388	278395	9984.81	SCG2
15	B3	30	68.533	274046	9920.18	SCG2
15	B3	31	68.8272	272575	9863.82	SCG2
15	B3	32	69.1214	269353	9818.32	SCG2
15	B3	33	69.4155	266742	9777.18	SCG2
15	B3	34	69.7097	262368	9741.58	SCG2
15	B3	35	70.0039	259745	9705.93	SCG2
15	B3	36	70.2981	257291	9673.77	SCG2
15	B3	37	70.5923	253666	9657.32	SCG2
15	B3	38	70.8865	251513	9670.96	SCG2
15	B3	39	71.1807	247922	9722.91	SCG2
15	B3	40	71.4748	245212	9810.91	SCG2
15	B3	41	71.769	242794	9902.38	SCG2
15	B3	42	72.0632	238733	9995.32	SCG2
15	B3	43	72.3574	235792	10082	SCG2
15	B3	44	72.6516	232409	10157	SCG2
15	B3	45	72.9458	229757	10221.5	SCG2
15	B3	46	73.24	225622	10280.2	SCG2
15	B3	47	73.5341	223169	10335.6	SCG2
15	B3	48	73.8283	220316	10382.9	SCG2
15	B3	49	74.1225	215996	10409.1	SCG2
15	B3	50	74.4167	213867	10396.4	SCG2
15	B3	51	74.7109	209466	10329.3	SCG2
15	B3	52	75.0051	206190	10201.7	SCG2
15	B3	53	75.2993	203396	10020.6	SCG2
15	B3	54	75.5934	200150	9798.48	SCG2
15	B3	55	75.8876	197175	9512.02	SCG2
15	B3	56	76.1818	194224	9244.95	SCG2
15	B3	57	76.476	192001	9016.19	SCG2
15	B3	58	76.7702	189896	8828.15	SCG2
15	B3	59	77.0644	186593	8669.54	SCG2
15	B3	60	77.3586	183694	8525.88	SCG2
15	B3	61	77.6527	180693	8391.38	SCG2
15	B3	62	77.9469	179137	8276.95	SCG2
15	B3	63	78.2411	176311	8213.26	SCG2
15	B3	64	78.5353	173996	8254.64	SCG2
15	B3	65	78.8295	171176	8492.16	SCG2
15	B3	66	79.1237	169584	9078.55	SCG2
15	B3	67	79.4179	166266	10164.4	SCG2
15	B3	68	79.712	164241	11822.2	SCG2
15	B3	69	80.0062	161162	14532.4	SCG2
15	B3	70	80.3004	158841	18566.4	SCG2
15	B3	71	80.5946	154619	23988.6	SCG2
15	B3	72	80.8888	149131	30475	SCG2
15	B3	73	81.183	138886	37209	SCG2
15	B3	74	81.4772	121604	42963	SCG2
15	B3	75	81.7713	90228.1	46411.5	SCG2
15	B3	76	82.0655	49887	46589.3	SCG2
15	B3	77	82.3597	21852.9	43284.4	SCG2
15	B3	78	82.6539	11884.5	37153	SCG2
15	B3	79	82.9481	10512.6	29479.5	SCG2
15	B3	80	83.2423	10059.7	21706	SCG2
15	B3	81	83.5365	9651.66	14971.5	SCG2
15	B3	82	83.8306	9725.9	9862.22	SCG2
15	B3	83	84.1248	10174.7	5487.03	SCG2
15	B3	84	84.419	9427.24	2849.47	SCG2
15	B3	85	84.7132	9285.99	1415.19	SCG2
15	B3	86	85.0074	9081.32	694.033	SCG2
15	B3	87	85.3016	8876.75	342.51	SCG2
15	B3	88	85.5958	8445.99	165.493	SCG2
15	B3	89	85.8899	9155.33	72.6328	SCG2
15	B3	90	86.1841	9023.82	27.625	SCG2
15	B3	91	86.4783	8676.17	11.5146	SCG2
15	B3	92	86.7725	8791.67	6.2998	SCG2
15	B3	93	87.0667	8089.71	-5.15527	SCG2
15	B3	94	87.3609	8520.14	-32.1387	SCG2
15	B3	95	87.6551	8390.37	-71.2324	SCG2
15	B3	96	87.9492	8428.85	-108.473	SCG2
15	B3	97	88.2434	8200.43	-127.637	SCG2
15	B3	98	88.5376	9196.75	-119.689	SCG2
15	B3	99	88.8318	8303.83	-87.6914	SCG2
15	B3	100	89.126	8287.95	-44.3857	SCG2
15	B3	101	89.4202	7587.99	-4.6582	SCG2
15	B3	102	89.7144	8614.06	21.6875	SCG2
15	B3	103	90.0085	8054.1	32.4521	SCG2
15	B3	104	90.3027	7960.18	30.9619	SCG2
15	B3	105	90.5969	7535.23	22.6484	SCG2
15	B3	106	90.8911	7668.23	12.4238	SCG2
15	B3	107	91.1853	8085.49	2.375	SCG2
15	B3	108	91.4795	8018.81	-10.5586	SCG2
15	B3	109	91.7737	7261.8	-34.7715	SCG2
15	B3	110	92.0678	7204.43	-79.543	SCG2
15	B3	111	92.362	7388.59	-147.47	SCG2
15	B3	112	92.6562	7573.35	-229.385	SCG2
15	B3	113	92.9504	7532.72	-306.629	SCG2
15	B3	114	93.2446	8016.59	-359.93	SCG2
15	B3	115	93.5388	7713.15	-379.229	SCG2
15	B3	116	93.833	8039.4	-368.438	SCG2
15	B3	117	94.1271	7795.2	-342.921	SCG2
15	B3	118	94.4213	7913.98	-321.752	SCG2
15	B3	119	94.7155	7247.7	-319.22	SCG2
16	B4	1	60.0016	406801	10937.1	SCG2
16	B4	2	60.2958	404377	10994.2	SCG2
16	B4	3	60.59	400800	11048	SCG2
16	B4	4	60.8842	397625	11084.5	SCG2
16	B4	5	61.1783	394912	11098.3	SCG2
16	B4	6	61.4725	391583	11093.4	SCG2
16	B4	7	61.7667	386919	11079.5	SCG2
16	B4	8	62.0609	384397	11066.4	SCG2
16	B4	9	62.3551	381053	11060	SCG2
16	B4	10	62.6493	377137	11060.7	SCG2
16	B4	11	62.9435	373409	11064.6	SCG2
16	B4	12	63.2376	370438	11065.3	SCG2
16	B4	13	63.5318	366480	11055.6	SCG2
16	B4	14	63.826	362827	11029.1	SCG2
16	B4	15	64.1202	359986	10982.1	SCG2
16	B4	16	64.4144	355835	10917.3	SCG2
16	B4	17	64.7086	352146	10844.8	SCG2
16	B4	18	65.0028	349042	10779.4	SCG2
16	B4	19	65.2969	345008	10733.4	SCG2
16	B4	20	65.5911	342793	10709.2	SCG2
16	B4	21	65.8853	339527	10698.8	SCG2
16	B4	22	66.1795	335032	10690.2	SCG2
16	B4	23	66.4737	332065	10677.2	SCG2
16	B4	24	66.7679	327773	10663.6	SCG2
16	B4	25	67.0621	325187	10656.9	SCG2
16	B4	26	67.3562	322150	10658.3	SCG2
16	B4	27	67.6504	319503	10656.9	SCG2
16	B4	28	67.9446	314450	10635	SCG2
16	B4	29	68.2388	311048	10579.7	SCG2
16	B4	30	68.533	307733	10491.9	SCG2
16	B4	31	68.8272	304922	10386.5	SCG2
16	B4	32	69.1214	301427	10282.3	SCG2
16	B4	33	69.4155	298333	10193.5	SCG2
16	B4	34	69.7097	295347	10123.8	SCG2
16	B4	35	70.0039	292245	10069.7	SCG2
16	B4	36	70.2981	288533	10025	SCG2
16	B4	37	70.5923	286075	9985.41	SCG2
16	B4	38	70.8865	282400	9949.71	SCG2
16	B4	39	71.1807	280060	9917.53	SCG2
16	B4	40	71.4748	276403	9887.33	SCG2
16	B4	41	71.769	273868	9855.99	SCG2
16	B4	42	72.0632	270309	9820.2	SCG2
16	B4	43	72.3574	266880	9778.01	SCG2
16	B4	44	72.6516	264719	9728.98	SCG2
16	B4	45	72.9458	261553	9665.91	SCG2
16	B4	46	73.24	258108	9590.99	SCG2
16	B4	47	73.5341	255153	9513.72	SCG2
16	B4	48	73.8283	252738	9439.62	SCG2
16	B4	49	74.1225	249424	9374.34	SCG2
16	B4	50	74.4167	247366	9320.1	SCG2
16	B4	51	74.7109	243915	9274.1	SCG2
16	B4	52	75.0051	241116	9229.96	SCG2
16	B4	53	75.2993	238498	9181.26	SCG2
16	B4	54	75.5934	235041	9124.15	SCG2
16	B4	55	75.8876	232866	9057.65	SCG2
16	B4	56	76.1818	230191	8982.25	SCG2
16	B4	57	76.476	227054	8899.24	SCG2
16	B4	58	76.7702	224345	8811	SCG2
16	B4	59	77.0644	221590	8722.51	SCG2
16	B4	60	77.3586	219328	8641.49	SCG2
16	B4	61	77.6527	216750	8579.1	SCG2
16	B4	62	77.9469	213609	8552.85	SCG2
16	B4	63	78.2411	211205	8594.53	SCG2
16	B4	64	78.5353	209144	8764.89	SCG2
16	B4	65	78.8295	206156	9176.56	SCG2
16	B4	66	79.1237	203628	9960.25	SCG2
16	B4	67	79.4179	200822	11230.3	SCG2
16	B4	68	79.712	198758	13425.9	SCG2
16	B4	69	80.0062	195140	16928.4	SCG2
16	B4	70	80.3004	191587	22048.5	SCG2
16	B4	71	80.5946	187449	28833.7	SCG2
16	B4	72	80.8888	179915	36855.2	SCG2
16	B4	73	81.183	168403	45094	SCG2
16	B4	74	81.4772	145903	52053	SCG2
16	B4	75	81.7713	107102	56144.3	SCG2
16	B4	76	82.0655	62042.2	56237.9	SCG2
16	B4	77	82.3597	29621.6	52120.3	SCG2
16	B4	78	82.6539	16432.4	44615	SCG2
16	B4	79	82.9481	14369	35282.7	SCG2
16	B4	80	83.2423	14133.2	25856.1	SCG2
16	B4	81	83.5365	14759.4	17693	SCG2
16	B4	82	83.8306	13376.9	11485.5	SCG2
16	B4	83	84.1248	13699.6	6682.5	SCG2
16	B4	84	84.419	13242.2	3490.53	SCG2
16	B4	85	84.7132	12782.1	1725.39	SCG2
16	B4	86	85.0074	13259.4	825.634	SCG2
16	B4	87	85.3016	12704.1	394.766	SCG2
16	B4	88	85.5958	12909.2	198.779	SCG2
16	B4	89	85.8899	12626.2	118.765	SCG2
16	B4	90	86.1841	12718.4	100.361	SCG2
16	B4	91	86.4783	12534.9	117.545	SCG2
16	B4	92	86.7725	12613.4	152.763	SCG2
16	B4	93	87.0667	12353.4	189.662	SCG2
16	B4	94	87.3609	11406.2	213.601	SCG2
16	B4	95	87.6551	12199.7	214.883	SCG2
16	B4	96	87.9492	11835.4	190.765	SCG2
16	B4	97	88.2434	11398	144.711	SCG2
16	B4	98	88.5376	11488.1	84.1631	SCG2
16	B4	99	88.8318	11625.2	18.6602	SCG2
16	B4	100	89.126	11227.4	-41.4785	SCG2
16	B4	101	89.4202	11515.1	-87.2139	SCG2
16	B4	102	89.7144	11417.5	-114.182	SCG2
16	B4	103	90.0085	11970.3	-125.327	SCG2
16	B4	104	90.3027	11082.7	-129.367	SCG2
16	B4	105	90.5969	11125.6	-133.994	SCG2
16	B4	106	90.8911	10726.9	-138.162	SCG2
16	B4	107	91.1853	11630.9	-130.552	SCG2
16	B4	108	91.4795	11767	-97.6289	SCG2
16	B4	109	91.7737	11441.6	-36.2207	SCG2
16	B4	110	92.0678	11029.1	39.5908	SCG2
16	B4	111	92.362	10630.9	103.688	SCG2
16	B4	112	92.6562	10602.2	132.074	SCG2
16	B4	113	92.9504	10492.8	115.93	SCG2
16	B4	114	93.2446	10380.4	65.2168	SCG2
16	B4	115	93.5388	10755.9	2.05078	SCG2
16	B4	116	93.833	10445.5	-50.5166	SCG2
16	B4	117	94.1271	10378.1	-77.5586	SCG2
16	B4	118	94.4213	10735.2	-75.6943	SCG2
16	B4	119	94.7155	10505.2	-51.2314	SCG2
17	B5	1	60.0016	388281	10295.6	SCG2
17	B5	2	60.2962	386003	10377.2	SCG2
17	B5	3	60.5909	383448	10475.9	SCG2
17	B5	4	60.8855	380916	10574.1	SCG2
17	B5	5	61.1801	377597	10654	SCG2
17	B5	6	61.4748	374668	10704.3	SCG2
17	B5	7	61.7694	370237	10724.4	SCG2
17	B5	8	62.0641	367145	10722.4	SCG2
17	B5	9	62.3587	364591	10710.2	SCG2
17	B5	10	62.6533	360862	10697.7	SCG2
17	B5	11	62.948	357038	10690.5	SCG2
17	B5	12	63.2426	354526	10689.6	SCG2
17	B5	13	63.5372	350413	10692.3	SCG2
17	B5	14	63.8319	347128	10692.6	SCG2
17	B5	15	64.1265	344336	10681.2	SCG2
17	B5	16	64.4211	341321	10649	SCG2
17	B5	17	64.7158	336370	10592.3	SCG2
17	B5	18	65.0104	333826	10517.1	SCG2
17	B5	19	65.3051	330367	10439.8	SCG2
17	B5	20	65.5997	327352	10380.2	SCG2
17	B5	21	65.8943	323724	10352.5	SCG2
17	B5	22	66.189	321452	10358.6	SCG2
17	B5	23	66.4836	317836	10386.2	SCG2
17	B5	24	66.7782	314616	10415.6	SCG2
17	B5	25	67.0729	311235	10428.5	SCG2
17	B5	26	67.3675	306922	10415.3	SCG2
17	B5	27	67.6621	304929	10376.5	SCG2
17	B5	28	67.9568	301087	10319.8	SCG2
17	B5	29	68.2514	298152	10255.1	SCG2
17	B5	30	68.5461	294391	10190.7	SCG2
17	B5	31	68.8407	291458	10131.8	SCG2
17	B5	32	69.1353	288940	10079.6	SCG2
17	B5	33	69.43	285572	10031.9	SCG2
17	B5	34	69.7246	282179	9984.52	SCG2
17	B5	35	70.0192	278851	9934.53	SCG2
17	B5	36	70.3139	276689	9879.5	SCG2
17	B5	37	70.6085	273075	9814.01	SCG2
17	B5	38	70.9031	270049	9760.47	SCG2
17	B5	39	71.1978	267526	9729.47	SCG2
17	B5	40	71.4924	264563	9730.2	SCG2
17	B5	41	71.787	261290	9768.07	SCG2
17	B5	42	72.0817	258412	9841.99	SCG2
17	B5	43	72.3763	256207	9930.79	SCG2
17	B5	44	72.671	252173	10016.3	SCG2
17	B5	45	72.9656	249364	10095.1	SCG2
17	B5	46	73.2602	245771	10154	SCG2
17	B5	47	73.5549	243148	10184.5	SCG2
17	B5	48	73.8495	239721	10183.6	SCG2
17	B5	49	74.1441	236284	10152.1	SCG2
[truncated: 7,686 more rows]

## Sheet: Dissolution curve results
Instrument Name	2765220071247
Instrument Mode	QuantStudio™ 5 System
Serial Number	2765220071247
Signal Smoothing	true
Creation Date	2024-08-04 17:58:45 afternoon CST
Heating Module Type	96-Well 0.2-mL Block
Reference Fluorescence
Analysis at a specific stage/cycle	stage2, step2
Experiment Name	2024-08-04_T24
Experiment File Name	D:\ZZH\2024-08-04_T24.eds
Experiment Barcode
Experiment Annotation
Experiment Type	Quantitative-Comparison
Experiment End Time	2024-08-04 17:42:18 afternoon CST
Calibration Background Expired	No
Calibration Background Perform	09-28-2022
Calibration Pure Dye ABY Expired	No
Calibration Pure Dye ABY Perform	09-28-2022
Calibration Pure Dye CY5 Expired	No
Calibration Pure Dye CY5 Perform	09-28-2022
Calibration Pure Dye FAM Expired	No
Calibration Pure Dye FAM Perform	09-28-2022
Calibration Pure Dye JUN Expired	No
Calibration Pure Dye JUN Perform	09-28-2022
Calibration Pure Dye MUSTANG PURPLE Expired	No
Calibration Pure Dye MUSTANG PURPLE Perform	09-28-2022
Calibration Pure Dye NED Expired	No
Calibration Pure Dye NED Perform	09-28-2022
Calibration Pure Dye ROX Expired	No
Calibration Pure Dye ROX Perform	09-28-2022
Calibration Pure Dye SYBR Expired	No
Calibration Pure Dye SYBR Perform	09-28-2022
Calibration Pure Dye TAMRA Expired	No
Calibration Pure Dye TAMRA 执行	09-28-2022
Calibration Pure Dye VIC Expired	No
Calibration Pure Dye VIC Perform	09-28-2022
Calibration ROI Expired	No
Calibration ROI Perform	09-28-2022
Calibration Uniformity Expired	No
Calibration Uniformity Perform	09-28-2022
Melt Curve Stage	Stage3
Username
Reagent	SYBR_GREEN
Post-read Stage/Step
Quantification Cycle Method	Ct
Pre-read Stage/Step Number
Reaction Well	Reaction Well Position	Sample	Gene Name	Tm	Dissolution peak height
1	A1	SV-1	SCG2	81.9472	44944.4
2	A2	SV-2	SCG2	82.0945	47154.4
3	A3	SV-3	SCG2	81.9184	42324.6
4	A4	T24-1	SCG2	81.9184	51207.8
5	A5	T24-2	SCG2	82.0993	54267.2
6	A6	T24-3	SCG2	82.0993	46357.6
7	A7	SW1710-1	SCG2	82.2243	51417
8	A8	SW1710-2	SCG2	82.0771	55358.7
9	A9	SW1710-3	SCG2	82.2506	51293.4
10	A10	T24-1	ACTIN	85.9343	56819.2
11	A11	T24-2	ACTIN	85.7336	57983.3
12	A12	T24-3	ACTIN	85.7336	55374.8
13	B1	SV-1	SCG2	81.9472	56608.3
14	B2	SV-2	SCG2	82.0945	49794.5
15	B3	SV-3	SCG2	81.9184	46943.3
16	B4	T24-1	SCG2	81.9184	56729.1
17	B5	T24-2	SCG2	82.0993	51732.2
18	B6	T24-3	SCG2	82.0993	56266.3
19	B7	SW1710-1	SCG2	82.2243	57809.1
20	B8	SW1710-2	SCG2	82.0771	54937.6
21	B9	SW1710-3	SCG2	82.2506	57426
22	B10	SV-1	ACTIN	85.9343	56211.4
23	B11	SV-2	ACTIN	85.7336	59141.4
24	B12	SV-3	ACTIN	85.7336	57728.7
25	C1	SV-1	SCG2	81.9472	48811.8
26	C2	SV-2	SCG2	82.0945	52946.7
27	C3	SV-3	SCG2	81.9184	48296.4
28	C4	T24-1	SCG2	81.9184	57940.9
29	C5	T24-2	SCG2	81.952	58140
30	C6	T24-3	SCG2	81.952	55154.2
31	C7	SW1710-1	SCG2	81.93	58925.1
32	C8	SW1710-2	SCG2	81.93	51601.9
33	C9	SW1710-3	SCG2	82.1033	48348.7
34	C10	SW1710-1	ACTIN	85.787	60866.3
35	C11	SW1710-2	ACTIN	85.7336	55375.7
36	C12	SW1710-3	ACTIN	85.5866	61945.9
37	D1	SV-1	COL5A2	79.5906	50848.2
38	D2	SV-2	COL5A2	79.7379	47414.4
39	D3	SV-3	COL5A2	79.712	55368.6
40	D4	T24-1	COL5A2	79.8591	60337.4
41	D5	T24-2	COL5A2	79.7422	59469.2
42	D6	T24-3	COL5A2	79.7422	59210.1
43	D7	SW1710-1	COL5A2	79.5751	61511.6
44	D8	SW1710-2	COL5A2	79.5751	57314.5
45	D9	SW1710-3	COL5A2	79.7457	71010.8
49	E1	SV-1	COL5A2	79.4433	59428.8
50	E2	SV-2	COL5A2	79.5906	50860.5
51	E3	SV-3	COL5A2	79.8591	53719
52	E4	T24-1	COL5A2	80.0062	61377.3
53	E5	T24-2	COL5A2	79.7422	57493.7
54	E6	T24-3	COL5A2	79.7422	60774.2
55	E7	SW1710-1	COL5A2	79.5751	64641.4
56	E8	SW1710-2	COL5A2	79.5751	60544.9
57	E9	SW1710-3	COL5A2	79.7457	65702.8
61	F1	SV-1	COL5A2	79.4433	48048
62	F2	SV-2	COL5A2	79.4433	49241.3
63	F3	SV-3	COL5A2	80.0062	50057
64	F4	T24-1	COL5A2	80.1533	58135.4
65	F5	T24-2	COL5A2	79.7422	60150.3
66	F6	T24-3	COL5A2	79.7422	63568.4
67	F7	SW1710-1	COL5A2	79.5751	64148.8
68	F8	SW1710-2	COL5A2	79.5751	59241
69	F9	SW1710-3	COL5A2	79.7457	56821.6
73	G1	SV-1	ACTIN	85.1876	38897.6
74	G2	SV-2	ACTIN	85.1876	42166.6
75	G3	SV-3	ACTIN	86.1841	48252.8
76	G4	T24-1	ACTIN	86.4783	42965
77	G5	T24-2	ACTIN	85.7823	54641.2
78	G6	T24-3	ACTIN	85.635	55391.2
79	G7	SW1710-1	ACTIN	85.4622	49989.2
80	G8	SW1710-2	ACTIN	85.4622	57981.6
81	G9	SW1710-3	ACTIN	85.6396	57513.2
85	H1	SV-1	ACTIN	85.1876	47458.5
86	H2	SV-2	ACTIN	85.3349	40680.4
87	H3	SV-3	ACTIN	86.3312	44944.5
88	H4	T24-1	ACTIN	86.4783	42279.7
89	H5	T24-2	ACTIN	85.7823	49400.3
90	H6	T24-3	ACTIN	85.7823	46619
91	H7	SW1710-1	ACTIN	85.4622	52460.5
92	H8	SW1710-2	ACTIN	85.4622	49158.9
93	H9	SW1710-3	ACTIN	85.787	50105.2
