# Supplementary material for: Construction and verification of a prognostic model for bladder cancer based on disulfidptosis-related angiogenesis genes
Source: PeerJ. 2025 Feb 21;13:e18911. doi: 10.7717/peerj.18911 (PMC11849515; doi:10.7717/peerj.18911)
Supplement: Supplemental Information 6 [file peerj-13-18911-s006.xls]

## Sheet: Sample setup
Instrument Name	2765220071247
Instrument Mode	QuantStudio™ 5 System
Serial Number	2765220071247
Signal Smoothing	true
Creation Date	2024-08-05 17:29:48 afternoon CST
Heating Module Type	96-Well 0.2-mL Block
Reference Fluorescence
Analysis at a specific stage/cycle	stage2, step2
Experiment Name	2024-08-05
Experiment File Name	D:\ZZH\2024-08-05.eds
Experiment Barcode
Experiment Annotation
Experiment Type	Quantitative-Comparison
Experiment End Time	2024-08-05 17:25:26 afternoon CST
Calibration Background Expired	No
Calibration Background Perform	09-28-2022
Calibration Pure Dye ABY Expired	No
Calibration Pure Dye ABY Perform	09-28-2022
Calibration Pure Dye CY5 Expired	No
Calibration Pure Dye CY5 Perform	09-28-2022
Calibration Pure Dye FAM Expired	No
Calibration Pure Dye FAM Perform	09-28-2022
Calibration Pure Dye JUN Expired	No
Calibration Pure Dye JUN Perform	09-28-2022
Calibration Pure Dye MUSTANG PURPLE Expired	No
Calibration Pure Dye MUSTANG PURPLE Perform	09-28-2022
Calibration Pure Dye NED Expired	No
Calibration Pure Dye NED Perform	09-28-2022
Calibration Pure Dye ROX Expired	No
Calibration Pure Dye ROX Perform	09-28-2022
Calibration Pure Dye SYBR Expired	No
Calibration Pure Dye SYBR Perform	09-28-2022
Calibration Pure Dye TAMRA Expired	No
Calibration Pure Dye TAMRA 执行	09-28-2022
Calibration Pure Dye VIC Expired	No
Calibration Pure Dye VIC Perform	09-28-2022
Calibration ROI Expired	No
Calibration ROI Perform	09-28-2022
Calibration Uniformity Expired	No
Calibration Uniformity Perform	09-28-2022
Melt Curve Stage	Stage3
Username
Reagent	SYBR_GREEN
Post-read Stage/Step
Quantification Cycle Method	Ct
Pre-read Stage/Step Number
Reaction Wel	Reaction Well Position	Sample Name	Sample Color	Biological Replicate Group Name	Biological Replicate Group Color	Gene Name	Gene Color	Task	Reporter Group	Quencher Group	number	Annotation
1	A1	SV-1	RGB(176,23,31)			SCG2	RGB(176,23,31)	UNKNOWN	SYBR	None
2	A2	SV-2	RGB(0,0,255)			SCG2	RGB(176,23,31)	UNKNOWN	SYBR	None
3	A3	SV-3	RGB(0,139,69)			SCG2	RGB(176,23,31)	UNKNOWN	SYBR	None
4	A4	T24-1	RGB(255,127,0)			SCG2	RGB(176,23,31)	UNKNOWN	SYBR	None
5	A5	T24-2	RGB(139,137,112)			SCG2	RGB(176,23,31)	UNKNOWN	SYBR	None
6	A6	T24-3	RGB(238,121,66)			SCG2	RGB(176,23,31)	UNKNOWN	SYBR	None
7	A7	SW1710-1	RGB(142,56,142)			SCG2	RGB(176,23,31)	UNKNOWN	SYBR	None
8	A8	SW1710-2	RGB(198,113,113)			SCG2	RGB(176,23,31)	UNKNOWN	SYBR	None
9	A9	SW1710-3	RGB(0,245,255)			SCG2	RGB(176,23,31)	UNKNOWN	SYBR	None
10	A10
11	A11
12	A12
13	B1	SV-1	RGB(176,23,31)			SCG2	RGB(176,23,31)	UNKNOWN	SYBR	None
14	B2	SV-2	RGB(0,0,255)			SCG2	RGB(176,23,31)	UNKNOWN	SYBR	None
15	B3	SV-3	RGB(0,139,69)			SCG2	RGB(176,23,31)	UNKNOWN	SYBR	None
16	B4	T24-1	RGB(255,127,0)			SCG2	RGB(176,23,31)	UNKNOWN	SYBR	None
17	B5	T24-2	RGB(139,137,112)			SCG2	RGB(176,23,31)	UNKNOWN	SYBR	None
18	B6	T24-3	RGB(238,121,66)			SCG2	RGB(176,23,31)	UNKNOWN	SYBR	None
19	B7	SW1710-1	RGB(142,56,142)			SCG2	RGB(176,23,31)	UNKNOWN	SYBR	None
20	B8	SW1710-2	RGB(198,113,113)			SCG2	RGB(176,23,31)	UNKNOWN	SYBR	None
21	B9	SW1710-3	RGB(0,245,255)			SCG2	RGB(176,23,31)	UNKNOWN	SYBR	None
22	B10
23	B11
24	B12
25	C1	SV-1	RGB(176,23,31)			SCG2	RGB(176,23,31)	UNKNOWN	SYBR	None
26	C2	SV-2	RGB(0,0,255)			SCG2	RGB(176,23,31)	UNKNOWN	SYBR	None
27	C3	SV-3	RGB(0,139,69)			SCG2	RGB(176,23,31)	UNKNOWN	SYBR	None
28	C4	T24-1	RGB(255,127,0)			SCG2	RGB(176,23,31)	UNKNOWN	SYBR	None
29	C5	T24-2	RGB(139,137,112)			SCG2	RGB(176,23,31)	UNKNOWN	SYBR	None
30	C6	T24-3	RGB(238,121,66)			SCG2	RGB(176,23,31)	UNKNOWN	SYBR	None
31	C7	SW1710-1	RGB(142,56,142)			SCG2	RGB(176,23,31)	UNKNOWN	SYBR	None
32	C8	SW1710-2	RGB(198,113,113)			SCG2	RGB(176,23,31)	UNKNOWN	SYBR	None
33	C9	SW1710-3	RGB(0,245,255)			SCG2	RGB(176,23,31)	UNKNOWN	SYBR	None
34	C10
35	C11
36	C12
37	D1	SV-1	RGB(176,23,31)			ACTIN	RGB(0,0,255)	UNKNOWN	SYBR	None
38	D2	SV-2	RGB(0,0,255)			ACTIN	RGB(0,0,255)	UNKNOWN	SYBR	None
39	D3	SV-3	RGB(0,139,69)			ACTIN	RGB(0,0,255)	UNKNOWN	SYBR	None
40	D4	T24-1	RGB(255,127,0)			ACTIN	RGB(0,0,255)	UNKNOWN	SYBR	None
41	D5	T24-2	RGB(139,137,112)			ACTIN	RGB(0,0,255)	UNKNOWN	SYBR	None
42	D6	T24-3	RGB(238,121,66)			ACTIN	RGB(0,0,255)	UNKNOWN	SYBR	None
43	D7	SW1710-1	RGB(142,56,142)			ACTIN	RGB(0,0,255)	UNKNOWN	SYBR	None
44	D8	SW1710-2	RGB(198,113,113)			ACTIN	RGB(0,0,255)	UNKNOWN	SYBR	None
45	D9	SW1710-3	RGB(0,245,255)			ACTIN	RGB(0,0,255)	UNKNOWN	SYBR	None
46	D10
47	D11
48	D12
49	E1	SV-1	RGB(176,23,31)			ACTIN	RGB(0,0,255)	UNKNOWN	SYBR	None
50	E2	SV-2	RGB(0,0,255)			ACTIN	RGB(0,0,255)	UNKNOWN	SYBR	None
51	E3	SV-3	RGB(0,139,69)			ACTIN	RGB(0,0,255)	UNKNOWN	SYBR	None
52	E4	T24-1	RGB(255,127,0)			ACTIN	RGB(0,0,255)	UNKNOWN	SYBR	None
53	E5	T24-2	RGB(139,137,112)			ACTIN	RGB(0,0,255)	UNKNOWN	SYBR	None
54	E6	T24-3	RGB(238,121,66)			ACTIN	RGB(0,0,255)	UNKNOWN	SYBR	None
55	E7	SW1710-1	RGB(142,56,142)			ACTIN	RGB(0,0,255)	UNKNOWN	SYBR	None
56	E8	SW1710-2	RGB(198,113,113)			ACTIN	RGB(0,0,255)	UNKNOWN	SYBR	None
57	E9	SW1710-3	RGB(0,245,255)			ACTIN	RGB(0,0,255)	UNKNOWN	SYBR	None
58	E10
59	E11
60	E12
61	F1	SV-1	RGB(176,23,31)			ACTIN	RGB(0,0,255)	UNKNOWN	SYBR	None
62	F2	SV-2	RGB(0,0,255)			ACTIN	RGB(0,0,255)	UNKNOWN	SYBR	None
63	F3	SV-3	RGB(0,139,69)			ACTIN	RGB(0,0,255)	UNKNOWN	SYBR	None
64	F4	T24-1	RGB(255,127,0)			ACTIN	RGB(0,0,255)	UNKNOWN	SYBR	None
65	F5	T24-2	RGB(139,137,112)			ACTIN	RGB(0,0,255)	UNKNOWN	SYBR	None
66	F6	T24-3	RGB(238,121,66)			ACTIN	RGB(0,0,255)	UNKNOWN	SYBR	None
67	F7	SW1710-1	RGB(142,56,142)			ACTIN	RGB(0,0,255)	UNKNOWN	SYBR	None
68	F8	SW1710-2	RGB(198,113,113)			ACTIN	RGB(0,0,255)	UNKNOWN	SYBR	None
69	F9	SW1710-3	RGB(0,245,255)			ACTIN	RGB(0,0,255)	UNKNOWN	SYBR	None
70	F10
71	F11
72	F12
73	G1
74	G2
75	G3
76	G4
77	G5
78	G6
79	G7
80	G8
81	G9
82	G10
83	G11
84	G12
85	H1
86	H2
87	H3
88	H4
89	H5
90	H6
91	H7
92	H8
93	H9
94	H10
95	H11
96	H12

## Sheet: Amplification data
Instrument Name	2765220071247
Instrument Mode	QuantStudio™ 5 System
Serial Number	2765220071247
Signal Smoothing	true
Creation Date	2024-08-05 17:29:48 afternoon CST
Heating Module Type	96-Well 0.2-mL Block
Reference Fluorescence
Analysis at a specific stage/cycle	stage2, step2
Experiment Name	2024-08-05
Experiment File Name	D:\ZZH\2024-08-05.eds
Experiment Barcode
Experiment Annotation
Experiment Type	Quantitative-Comparison
Experiment End Time	2024-08-05 17:25:26 afternoon CST
Calibration Background Expired	No
Calibration Background Perform	09-28-2022
Calibration Pure Dye ABY Expired	No
Calibration Pure Dye ABY Perform	09-28-2022
Calibration Pure Dye CY5 Expired	No
Calibration Pure Dye CY5 Perform	09-28-2022
Calibration Pure Dye FAM Expired	No
Calibration Pure Dye FAM Perform	09-28-2022
Calibration Pure Dye JUN Expired	No
Calibration Pure Dye JUN Perform	09-28-2022
Calibration Pure Dye MUSTANG PURPLE Expired	No
Calibration Pure Dye MUSTANG PURPLE Perform	09-28-2022
Calibration Pure Dye NED Expired	No
Calibration Pure Dye NED Perform	09-28-2022
Calibration Pure Dye ROX Expired	No
Calibration Pure Dye ROX Perform	09-28-2022
Calibration Pure Dye SYBR Expired	No
Calibration Pure Dye SYBR Perform	09-28-2022
Calibration Pure Dye TAMRA Expired	No
Calibration Pure Dye TAMRA 执行	09-28-2022
Calibration Pure Dye VIC Expired	No
Calibration Pure Dye VIC Perform	09-28-2022
Calibration ROI Expired	No
Calibration ROI Perform	09-28-2022
Calibration Uniformity Expired	No
Calibration Uniformity Perform	09-28-2022
Melt Curve Stage	Stage3
Username
Reagent	SYBR_GREEN
Post-read Stage/Step
Quantification Cycle Method	Ct
Pre-read Stage/Step Number
Reaction Well	Reaction Well Position	Cycle Number	Gene Name	Rn	ΔRn
1	A1	1	SCG2	52828.6	1820.6
1	A1	2	SCG2	52679.1	1728.13
1	A1	3	SCG2	51845.6	951.71
1	A1	4	SCG2	51481.3	644.375
1	A1	5	SCG2	51152.1	372.295
1	A1	6	SCG2	50379.1	-343.699
1	A1	7	SCG2	50178.1	-487.701
1	A1	8	SCG2	50317.5	-291.223
1	A1	9	SCG2	50325.2	-226.483
1	A1	10	SCG2	50342.1	-152.567
1	A1	11	SCG2	49914.2	-523.468
1	A1	12	SCG2	49834.8	-545.849
1	A1	13	SCG2	50095.3	-228.281
1	A1	14	SCG2	50097	-169.517
1	A1	15	SCG2	50108.2	-101.324
1	A1	16	SCG2	50307.7	155.197
1	A1	17	SCG2	50281.3	185.839
1	A1	18	SCG2	50201.5	163.06
1	A1	19	SCG2	50022.6	41.2373
1	A1	20	SCG2	49651.2	-273.187
1	A1	21	SCG2	49683.8	-183.482
1	A1	22	SCG2	50160	349.7
1	A1	23	SCG2	50166.8	413.502
1	A1	24	SCG2	49946.1	249.867
1	A1	25	SCG2	49945.3	306.103
1	A1	26	SCG2	50287.7	705.581
1	A1	27	SCG2	50632.5	1107.41
1	A1	28	SCG2	52381.2	2913.14
1	A1	29	SCG2	55346.1	5935.04
1	A1	30	SCG2	60711.1	11357.1
1	A1	31	SCG2	70826.4	21529.4
1	A1	32	SCG2	87825.9	38586
1	A1	33	SCG2	113890	64707.2
1	A1	34	SCG2	149051	99925.3
1	A1	35	SCG2	186850	137781
1	A1	36	SCG2	220048	171037
1	A1	37	SCG2	244331	195377
1	A1	38	SCG2	262498	213600
1	A1	39	SCG2	275744	226904
1	A1	40	SCG2	283845	235061
2	A2	1	SCG2	42396.2	-161.745
2	A2	2	SCG2	42379.7	-118.779
2	A2	3	SCG2	42673.9	234.917
2	A2	4	SCG2	42948.9	569.372
2	A2	5	SCG2	42825.4	505.365
2	A2	6	SCG2	42054.4	-206.13
2	A2	7	SCG2	41819	-382.054
2	A2	8	SCG2	41808.4	-333.24
2	A2	9	SCG2	41684.6	-397.517
2	A2	10	SCG2	41673.3	-349.375
2	A2	11	SCG2	41898.7	-64.4907
2	A2	12	SCG2	41916.8	13.1004
2	A2	13	SCG2	41862.2	18.0586
2	A2	14	SCG2	41840	55.3411
2	A2	15	SCG2	41640.6	-84.5756
2	A2	16	SCG2	41609.8	-55.9494
2	A2	17	SCG2	41738.5	132.228
2	A2	18	SCG2	41454.6	-92.2243
2	A2	19	SCG2	41417.7	-69.6215
2	A2	20	SCG2	41606.5	178.665
2	A2	21	SCG2	41579.6	211.291
2	A2	22	SCG2	41425.7	116.839
2	A2	23	SCG2	41435.4	185.993
2	A2	24	SCG2	41677.6	487.697
2	A2	25	SCG2	41921.9	791.507
2	A2	26	SCG2	42297.3	1226.37
2	A2	27	SCG2	42625	1613.55
2	A2	28	SCG2	43939.9	2987.96
2	A2	29	SCG2	46646.5	5754.04
2	A2	30	SCG2	51678.2	10845.2
2	A2	31	SCG2	60293.8	19520.3
2	A2	32	SCG2	74829.2	34115.2
2	A2	33	SCG2	98930.1	58275.6
2	A2	34	SCG2	131314	90718.4
2	A2	35	SCG2	166575	126040
2	A2	36	SCG2	195852	155376
2	A2	37	SCG2	217846	177430
2	A2	38	SCG2	236399	196042
2	A2	39	SCG2	250425	210127
2	A2	40	SCG2	258406	218168
3	A3	1	SCG2	41369.5	-229.065
3	A3	2	SCG2	41773.1	196.683
3	A3	3	SCG2	41845.3	290.977
3	A3	4	SCG2	41632.5	100.326
3	A3	5	SCG2	41489.5	-20.6413
3	A3	6	SCG2	41342.8	-145.206
3	A3	7	SCG2	41270.8	-195.033
3	A3	8	SCG2	41298.5	-145.246
3	A3	9	SCG2	41356	-65.6552
3	A3	10	SCG2	41664	264.518
3	A3	11	SCG2	41403.3	25.8867
3	A3	12	SCG2	41279.6	-75.7056
3	A3	13	SCG2	41330.7	-2.42292
3	A3	14	SCG2	41264.5	-46.5113
3	A3	15	SCG2	41131.7	-157.244
3	A3	16	SCG2	41126.2	-140.54
3	A3	17	SCG2	41347.3	102.634
3	A3	18	SCG2	41274.8	52.26
3	A3	19	SCG2	41195.8	-4.66828
3	A3	20	SCG2	41196.9	18.6222
3	A3	21	SCG2	41198.9	42.7213
3	A3	22	SCG2	41235	100.93
3	A3	23	SCG2	41096.7	-15.2759
3	A3	24	SCG2	41239.3	149.448
3	A3	25	SCG2	42219.3	1151.6
3	A3	26	SCG2	43108.3	2062.68
3	A3	27	SCG2	44696.6	3673.1
3	A3	28	SCG2	47728.9	6727.55
3	A3	29	SCG2	53784	12804.7
3	A3	30	SCG2	64945	23987.9
3	A3	31	SCG2	83098.2	42163.2
3	A3	32	SCG2	109653	68740.1
3	A3	33	SCG2	141273	100383
3	A3	34	SCG2	173057	132188
3	A3	35	SCG2	202616	161769
3	A3	36	SCG2	226852	186027
3	A3	37	SCG2	245185	204383
3	A3	38	SCG2	257696	216916
3	A3	39	SCG2	266260	225502
3	A3	40	SCG2	271591	230855
4	A4	1	SCG2	62499.3	-800.33
4	A4	2	SCG2	62981.3	-92.2794
4	A4	3	SCG2	63156	308.51
4	A4	4	SCG2	62881.1	259.779
4	A4	5	SCG2	62291.8	-103.455
4	A4	6	SCG2	61993.3	-175.846
4	A4	7	SCG2	61833.8	-109.248
4	A4	8	SCG2	61676.1	-40.8693
4	A4	9	SCG2	61392.9	-97.9982
4	A4	10	SCG2	61137.7	-127.076
4	A4	11	SCG2	60658.9	-379.74
4	A4	12	SCG2	60564.2	-248.354
4	A4	13	SCG2	60774.9	188.451
4	A4	14	SCG2	60688.4	328.041
4	A4	15	SCG2	60332.1	197.806
4	A4	16	SCG2	60249.2	341.084
4	A4	17	SCG2	60262.9	580.83
4	A4	18	SCG2	60349.9	894.002
4	A4	19	SCG2	60708.6	1478.77
4	A4	20	SCG2	60752.3	1748.56
4	A4	21	SCG2	60778.2	2000.59
4	A4	22	SCG2	61140.5	2588.94
4	A4	23	SCG2	62335.3	4009.85
4	A4	24	SCG2	64390.2	6290.83
4	A4	25	SCG2	68174.8	10301.5
4	A4	26	SCG2	75358.2	17711.1
4	A4	27	SCG2	87735.9	30314.9
4	A4	28	SCG2	107751	50555.7
4	A4	29	SCG2	137587	80618.1
4	A4	30	SCG2	173842	117100
4	A4	31	SCG2	208374	151857
4	A4	32	SCG2	235495	179205
4	A4	33	SCG2	255081	199016
4	A4	34	SCG2	269426	213587
4	A4	35	SCG2	280608	224996
4	A4	36	SCG2	288878	233492
4	A4	37	SCG2	294157	238997
4	A4	38	SCG2	297847	242913
4	A4	39	SCG2	299811	245103
4	A4	40	SCG2	301598	247117
5	A5	1	SCG2	22740.3	2887.08
5	A5	2	SCG2	21291.5	2314.56
5	A5	3	SCG2	19205.4	1104.82
5	A5	4	SCG2	17898.4	674.224
5	A5	5	SCG2	16517.3	169.529
5	A5	6	SCG2	14953.1	-518.277
5	A5	7	SCG2	14182.8	-412.21
5	A5	8	SCG2	13076	-642.679
5	A5	9	SCG2	12110.2	-732.102
5	A5	10	SCG2	11160	-805.895
5	A5	11	SCG2	10628.4	-461.154
5	A5	12	SCG2	10011.2	-202.028
5	A5	13	SCG2	9472.68	135.861
5	A5	14	SCG2	9152.83	692.39
5	A5	15	SCG2	8581.59	997.521
5	A5	16	SCG2	8000.77	1293.07
5	A5	17	SCG2	7814.69	1983.36
5	A5	18	SCG2	7730.36	2775.4
5	A5	19	SCG2	7618.78	3540.19
5	A5	20	SCG2	7403.68	4201.46
5	A5	21	SCG2	7453.05	5127.21
5	A5	22	SCG2	7885.34	6435.86
5	A5	23	SCG2	8321.03	7747.93
5	A5	24	SCG2	9839.59	10142.9
5	A5	25	SCG2	12929.4	14109.1
5	A5	26	SCG2	18860.4	20916.4
5	A5	27	SCG2	29538.8	32471.2
5	A5	28	SCG2	47586	51394.8
5	A5	29	SCG2	75634.5	80319.6
5	A5	30	SCG2	111488	117050
5	A5	31	SCG2	146956	153393
5	A5	32	SCG2	175808	183122
5	A5	33	SCG2	197380	205571
5	A5	34	SCG2	213273	222340
5	A5	35	SCG2	224662	234606
5	A5	36	SCG2	233053	243873
5	A5	37	SCG2	238513	250209
5	A5	38	SCG2	242728	255301
5	A5	39	SCG2	245034	258483
5	A5	40	SCG2	246861	261186
6	A6	1	SCG2	-2136.06	753.592
6	A6	2	SCG2	-2256.68	820.759
6	A6	3	SCG2	-2733.86	531.363
6	A6	4	SCG2	-3011.83	441.173
6	A6	5	SCG2	-3254.88	385.912
6	A6	6	SCG2	-3702.64	125.934
6	A6	7	SCG2	-4496.61	-480.252
6	A6	8	SCG2	-5197.02	-992.882
6	A6	9	SCG2	-5252.99	-861.069
6	A6	10	SCG2	-4707.55	-127.845
6	A6	11	SCG2	-4564.44	203.045
6	A6	12	SCG2	-4691.65	263.624
6	A6	13	SCG2	-4942.19	200.867
6	A6	14	SCG2	-5518.91	-188.07
6	A6	15	SCG2	-5671.24	-152.62
6	A6	16	SCG2	-5594.35	112.049
6	A6	17	SCG2	-5606.49	287.693
6	A6	18	SCG2	-5830.89	251.079
6	A6	19	SCG2	-5860.48	409.275
6	A6	20	SCG2	-5690.27	767.27
6	A6	21	SCG2	-5180.01	1465.31
6	A6	22	SCG2	-3642.06	3191.05
6	A6	23	SCG2	-1291.99	5728.89
6	A6	24	SCG2	2819.72	10028.4
6	A6	25	SCG2	10802.7	18199.2
6	A6	26	SCG2	24924.9	32509.1
6	A6	27	SCG2	48026.8	55798.8
6	A6	28	SCG2	81889.7	89849.5
6	A6	29	SCG2	122766	130913
6	A6	30	SCG2	162064	170399
6	A6	31	SCG2	192788	201311
6	A6	32	SCG2	215245	223956
6	A6	33	SCG2	231416	240315
6	A6	34	SCG2	243502	252589
6	A6	35	SCG2	252145	261419
6	A6	36	SCG2	258584	268046
6	A6	37	SCG2	263044	272694
6	A6	38	SCG2	266357	276194
6	A6	39	SCG2	268484	278510
6	A6	40	SCG2	269790	280003
7	A7	1	SCG2	40008.6	-639.612
7	A7	2	SCG2	40179.5	-484.905
7	A7	3	SCG2	40272.8	-407.761
7	A7	4	SCG2	40556.9	-139.781
7	A7	5	SCG2	40767.5	54.594
7	A7	6	SCG2	40739.5	10.4572
7	A7	7	SCG2	40699.2	-46.0118
7	A7	8	SCG2	40404.9	-356.547
7	A7	9	SCG2	40443.7	-333.907
7	A7	10	SCG2	41149.1	355.328
7	A7	11	SCG2	41430.6	620.64
7	A7	12	SCG2	41330.4	504.327
7	A7	13	SCG2	40896	53.6631
7	A7	14	SCG2	40795.9	-62.5558
7	A7	15	SCG2	41085.2	210.6
7	A7	16	SCG2	41073.9	183.1
7	A7	17	SCG2	41089.5	182.459
7	A7	18	SCG2	41188.7	265.549
7	A7	19	SCG2	40997.5	58.1895
7	A7	20	SCG2	40460	-495.561
7	A7	21	SCG2	40314.9	-656.784
7	A7	22	SCG2	40437.9	-549.928
7	A7	23	SCG2	40596.2	-407.819
7	A7	24	SCG2	41331.9	311.697
7	A7	25	SCG2	41729.6	693.204
7	A7	26	SCG2	42933.4	1880.77
7	A7	27	SCG2	44887.9	3819.18
7	A7	28	SCG2	49123.1	8038.19
7	A7	29	SCG2	57689.4	16588.3
7	A7	30	SCG2	71937.9	30820.6
7	A7	31	SCG2	95605.3	54471.9
7	A7	32	SCG2	130568	89417.9
7	A7	33	SCG2	172845	131679
7	A7	34	SCG2	212693	171511
7	A7	35	SCG2	243479	202281
7	A7	36	SCG2	266533	225318
7	A7	37	SCG2	284550	243320
7	A7	38	SCG2	297709	256462
7	A7	39	SCG2	306658	265395
7	A7	40	SCG2	312484	271205
8	A8	1	SCG2	57050.1	1328.31
8	A8	2	SCG2	56860.9	1475.46
8	A8	3	SCG2	56089.4	1040.27
8	A8	4	SCG2	55122.4	409.643
8	A8	5	SCG2	54662.2	285.779
8	A8	6	SCG2	54157.4	117.289
8	A8	7	SCG2	53343.4	-360.333
8	A8	8	SCG2	52741.1	-626.373
8	A8	9	SCG2	52397.8	-633.304
8	A8	10	SCG2	52168.8	-526
8	A8	11	SCG2	51935.6	-422.873
8	A8	12	SCG2	51800.3	-221.807
8	A8	13	SCG2	51742.4	56.6094
8	A8	14	SCG2	51117.9	-231.622
8	A8	15	SCG2	50668.8	-344.369
8	A8	16	SCG2	50574	-102.874
8	A8	17	SCG2	50741	400.484
8	A8	18	SCG2	50609.9	605.698
8	A8	19	SCG2	50221.6	553.782
8	A8	20	SCG2	49763.8	432.227
8	A8	21	SCG2	49781.9	786.706
8	A8	22	SCG2	50260	1601.17
8	A8	23	SCG2	50375.9	2053.33
8	A8	24	SCG2	50502.3	2516.1
8	A8	25	SCG2	51323.3	3673.41
8	A8	26	SCG2	52504.8	5191.25
8	A8	27	SCG2	54940.7	7963.45
8	A8	28	SCG2	59878.2	13237.2
8	A8	29	SCG2	68956.5	22651.9
8	A8	30	SCG2	85772.6	39804.4
8	A8	31	SCG2	112443	66811.1
8	A8	32	SCG2	146121	100826
8	A8	33	SCG2	180265	135306
8	A8	34	SCG2	211725	167102
8	A8	35	SCG2	239684	195397
8	A8	36	SCG2	261512	217562
8	A8	37	SCG2	276787	233173
8	A8	38	SCG2	286952	243675
8	A8	39	SCG2	293640	250699
8	A8	40	SCG2	297657	255052
9	A9	1	SCG2	33062.2	482.646
9	A9	2	SCG2	32471	710.067
9	A9	3	SCG2	31125.7	183.327
9	A9	4	SCG2	30141.8	18.1075
9	A9	5	SCG2	28871.4	-433.69
9	A9	6	SCG2	28241.8	-244.725
9	A9	7	SCG2	27675.9	7.95793
9	A9	8	SCG2	26998.8	149.467
9	A9	9	SCG2	26362.7	331.981
9	A9	10	SCG2	25194.7	-17.4045
9	A9	11	SCG2	24520.9	127.382
9	A9	12	SCG2	23575.3	0.393555
9	A9	13	SCG2	22930.8	174.549
9	A9	14	SCG2	22203.4	265.719
9	A9	15	SCG2	20556	-563.065
9	A9	16	SCG2	20131.6	-168.811
9	A9	17	SCG2	20384.3	902.446
9	A9	18	SCG2	20294.4	1631.21
9	A9	19	SCG2	19933.1	2088.44
9	A9	20	SCG2	19227.3	2201.25
9	A9	21	SCG2	18914.7	2707.25
9	A9	22	SCG2	18577.2	3188.42
9	A9	23	SCG2	18404.1	3833.89
9	A9	24	SCG2	18188.5	4436.9
9	A9	25	SCG2	18261	5327.97
9	A9	26	SCG2	18859.7	6745.32
9	A9	27	SCG2	19582.6	8286.8
9	A9	28	SCG2	21293.4	10816.3
9	A9	29	SCG2	25680.8	16022.2
9	A9	30	SCG2	33676.5	24836.5
9	A9	31	SCG2	47316.3	39295
9	A9	32	SCG2	71172.1	63969.4
9	A9	33	SCG2	105198	98813.7
9	A9	34	SCG2	146012	140446
9	A9	35	SCG2	184738	179991
9	A9	36	SCG2	214769	210841
9	A9	37	SCG2	239207	236097
9	A9	38	SCG2	258616	256325
9	A9	39	SCG2	271494	270022
9	A9	40	SCG2	280045	279391
10	A10	1
10	A10	2
10	A10	3
10	A10	4
10	A10	5
10	A10	6
10	A10	7
10	A10	8
10	A10	9
10	A10	10
10	A10	11
10	A10	12
10	A10	13
10	A10	14
10	A10	15
10	A10	16
10	A10	17
10	A10	18
10	A10	19
10	A10	20
10	A10	21
10	A10	22
10	A10	23
10	A10	24
10	A10	25
10	A10	26
10	A10	27
10	A10	28
10	A10	29
10	A10	30
10	A10	31
10	A10	32
10	A10	33
10	A10	34
10	A10	35
10	A10	36
10	A10	37
10	A10	38
10	A10	39
10	A10	40
11	A11	1
11	A11	2
11	A11	3
11	A11	4
11	A11	5
11	A11	6
11	A11	7
11	A11	8
11	A11	9
11	A11	10
11	A11	11
11	A11	12
11	A11	13
11	A11	14
11	A11	15
11	A11	16
11	A11	17
11	A11	18
11	A11	19
11	A11	20
11	A11	21
11	A11	22
11	A11	23
11	A11	24
11	A11	25
11	A11	26
11	A11	27
11	A11	28
11	A11	29
11	A11	30
11	A11	31
11	A11	32
11	A11	33
11	A11	34
11	A11	35
11	A11	36
11	A11	37
11	A11	38
11	A11	39
11	A11	40
12	A12	1
12	A12	2
12	A12	3
12	A12	4
12	A12	5
12	A12	6
12	A12	7
12	A12	8
12	A12	9
12	A12	10
12	A12	11
12	A12	12
12	A12	13
12	A12	14
12	A12	15
12	A12	16
12	A12	17
12	A12	18
12	A12	19
12	A12	20
12	A12	21
12	A12	22
12	A12	23
12	A12	24
12	A12	25
12	A12	26
12	A12	27
12	A12	28
12	A12	29
12	A12	30
12	A12	31
12	A12	32
12	A12	33
12	A12	34
12	A12	35
12	A12	36
12	A12	37
12	A12	38
12	A12	39
12	A12	40
13	B1	1	SCG2	53215.8	1283.28
13	B1	2	SCG2	53005.9	1098.63
13	B1	3	SCG2	52219.4	337.438
13	B1	4	SCG2	51908.9	52.2788
13	B1	5	SCG2	51654.6	-176.759
13	B1	6	SCG2	51522.7	-283.395
13	B1	7	SCG2	51438.1	-342.718
13	B1	8	SCG2	51496.6	-258.939
13	B1	9	SCG2	51936.4	206.152
13	B1	10	SCG2	51805.3	100.384
13	B1	11	SCG2	51769.5	89.8066
13	B1	12	SCG2	52131.5	477.097
13	B1	13	SCG2	52075	445.953
13	B1	14	SCG2	51529.1	-74.7524
13	B1	15	SCG2	51406.2	-172.321
13	B1	16	SCG2	51513.6	-39.6601
13	B1	17	SCG2	51068.6	-459.389
13	B1	18	SCG2	51108.6	-394.08
13	B1	19	SCG2	51733.7	256.3
13	B1	20	SCG2	51657.9	205.79
13	B1	21	SCG2	51457.6	30.8145
13	B1	22	SCG2	51426.4	24.8821
13	B1	23	SCG2	51789.4	413.196
13	B1	24	SCG2	52542.7	1191.77
13	B1	25	SCG2	53205.2	1879.51
13	B1	26	SCG2	53938.5	2638.16
13	B1	27	SCG2	55560.6	4285.51
13	B1	28	SCG2	59256.7	8006.92
13	B1	29	SCG2	65395.5	14171
13	B1	30	SCG2	77416.1	26216.8
13	B1	31	SCG2	97389.1	46215.1
13	B1	32	SCG2	127161	76012.2
13	B1	33	SCG2	163864	112741
13	B1	34	SCG2	196453	145355
13	B1	35	SCG2	223000	171927
13	B1	36	SCG2	245651	194603
13	B1	37	SCG2	264214	213192
13	B1	38	SCG2	277636	226639
13	B1	39	SCG2	285638	234667
13	B1	40	SCG2	291360	240413
14	B2	1	SCG2	46231.5	-4.84204
14	B2	2	SCG2	46128.7	-47.1998
14	B2	3	SCG2	45995	-120.573
14	B2	4	SCG2	46004.8	-50.3373
14	B2	5	SCG2	45933.1	-61.6326
14	B2	6	SCG2	45955.7	21.3338
14	B2	7	SCG2	45898.7	24.7768
14	B2	8	SCG2	45874.3	60.7315
14	B2	9	SCG2	46233	479.889
14	B2	10	SCG2	46356.9	664.137
14	B2	11	SCG2	45841.7	209.381
14	B2	12	SCG2	45702.5	130.566
14	B2	13	SCG2	45758.8	247.275
14	B2	14	SCG2	44791	-660.138
14	B2	15	SCG2	44506	-884.699
14	B2	16	SCG2	44471	-859.307
14	B2	17	SCG2	44667.5	-602.481
14	B2	18	SCG2	45439.2	229.657
14	B2	19	SCG2	45374.7	225.526
14	B2	20	SCG2	45277.9	189.145
14	B2	21	SCG2	45399.9	371.518
14	B2	22	SCG2	45289.3	321.414
14	B2	23	SCG2	44971.4	63.8177
14	B2	24	SCG2	45047.4	200.3
14	B2	25	SCG2	46034.4	1247.63
14	B2	26	SCG2	47149.8	2423.46
14	B2	27	SCG2	48116	3450.11
14	B2	28	SCG2	50134.4	5528.83
14	B2	29	SCG2	55046.5	10501.3
14	B2	30	SCG2	64407.6	19922.9
14	B2	31	SCG2	80383.7	35959.4
14	B2	32	SCG2	105912	61548.4
14	B2	33	SCG2	141616	97312.9
14	B2	34	SCG2	182294	138051
14	B2	35	SCG2	219052	174869
14	B2	36	SCG2	246448	202325
14	B2	37	SCG2	267742	223681
14	B2	38	SCG2	283932	239931
14	B2	39	SCG2	295106	251165
14	B2	40	SCG2	302866	258986
15	B3	1	SCG2	41768.3	71.9457
15	B3	2	SCG2	42076	393.195
15	B3	3	SCG2	42009.5	340.3
15	B3	4	SCG2	41749.1	93.421
15	B3	5	SCG2	41638	-4.20445
15	B3	6	SCG2	41592.5	-36.1228
15	B3	7	SCG2	41555.1	-60.0139
15	B3	8	SCG2	41583.9	-17.6862
15	B3	9	SCG2	41487.3	-100.687
15	B3	10	SCG2	41425.3	-149.207
15	B3	11	SCG2	41505.9	-55.0858
15	B3	12	SCG2	41781.4	234.027
15	B3	13	SCG2	41619.3	85.4485
15	B3	14	SCG2	41271.2	-249.087
15	B3	15	SCG2	41199.6	-307.228
15	B3	16	SCG2	41269.5	-223.721
15	B3	17	SCG2	41447.5	-32.1899
15	B3	18	SCG2	41473.7	7.48936
15	B3	19	SCG2	41431.1	-21.4993
15	B3	20	SCG2	41434.5	-4.56616
15	B3	21	SCG2	41526.2	100.605
15	B3	22	SCG2	41647.7	235.656
15	B3	23	SCG2	41562.8	164.351
15	B3	24	SCG2	41550.7	165.784
15	B3	25	SCG2	41973.8	602.443
15	B3	26	SCG2	42966.3	1608.47
15	B3	27	SCG2	44240.9	2896.56
15	B3	28	SCG2	47048.2	5717.43
15	B3	29	SCG2	52072.1	10754.9
15	B3	30	SCG2	61062.2	19758.5
15	B3	31	SCG2	76885.1	35594.9
15	B3	32	SCG2	102376	61099.1
15	B3	33	SCG2	138051	96788
15	B3	34	SCG2	179270	138021
15	B3	35	SCG2	216153	174917
15	B3	36	SCG2	244390	203168
15	B3	37	SCG2	264864	223655
15	B3	38	SCG2	280147	238952
15	B3	39	SCG2	291686	250505
15	B3	40	SCG2	299524	258356
16	B4	1	SCG2	46982.9	-467.466
16	B4	2	SCG2	47302.5	-204.81
16	B4	3	SCG2	47748.6	184.33
16	B4	4	SCG2	47776.8	155.619
16	B4	5	SCG2	47788.1	109.955
16	B4	6	SCG2	47501.8	-233.315
16	B4	7	SCG2	47453.5	-338.604
16	B4	8	SCG2	47818.3	-30.7094
16	B4	9	SCG2	47862.8	-43.2056
16	B4	10	SCG2	47975	12.0521
16	B4	11	SCG2	47904	-115.87
16	B4	12	SCG2	47991.4	-85.4247
16	B4	13	SCG2	48528.4	394.681
16	B4	14	SCG2	48299.4	108.684
16	B4	15	SCG2	48150.4	-97.2102
16	B4	16	SCG2	48283.6	-20.9837
16	B4	17	SCG2	48313.4	-48.1244
16	B4	18	SCG2	48680.1	261.641
16	B4	19	SCG2	48845.1	369.618
16	B4	20	SCG2	49042.5	510.125
16	B4	21	SCG2	49638.9	1049.52
16	B4	22	SCG2	49936.2	1289.94
16	B4	23	SCG2	51414.7	2711.45
16	B4	24	SCG2	53610.2	4850.01
16	B4	25	SCG2	57601.6	8784.5
16	B4	26	SCG2	66404.4	17530.3
16	B4	27	SCG2	80941.9	32010.9
16	B4	28	SCG2	103860	54872.3
16	B4	29	SCG2	138079	89033.7
16	B4	30	SCG2	179416	130314
16	B4	31	SCG2	218218	169059
16	B4	32	SCG2	249796	200580
16	B4	33	SCG2	272079	222806
16	B4	34	SCG2	288689	239359
16	B4	35	SCG2	301376	251989
16	B4	36	SCG2	310465	261022
16	B4	37	SCG2	316974	267473
16	B4	38	SCG2	322299	272742
16	B4	39	SCG2	326046	276432
16	B4	40	SCG2	327758	278087
17	B5	1	SCG2	40680.4	518.408
17	B5	2	SCG2	40705.8	591.855
17	B5	3	SCG2	40590	524.114
17	B5	4	SCG2	40411.3	393.4
17	B5	5	SCG2	40241.6	271.722
17	B5	6	SCG2	39897.4	-24.4254
17	B5	7	SCG2	39350.8	-523.022
17	B5	8	SCG2	39288.5	-537.337
17	B5	9	SCG2	39558.2	-219.547
17	B5	10	SCG2	39604.6	-125.131
17	B5	11	SCG2	39662.7	-18.9974
17	B5	12	SCG2	39642.4	8.71872
17	B5	13	SCG2	39635.7	50.0481
17	B5	14	SCG2	39444.5	-93.1694
17	B5	15	SCG2	39338.3	-151.313
17	B5	16	SCG2	39230.7	-210.933
17	B5	17	SCG2	39204.3	-189.291
17	B5	18	SCG2	39332.5	-13.0629
17	B5	19	SCG2	39777.2	479.645
17	B5	20	SCG2	39628.1	378.58
17	B5	21	SCG2	39726.9	525.472
17	B5	22	SCG2	40717.4	1563.91
17	B5	23	SCG2	41965.6	2860.17
17	B5	24	SCG2	44563.9	5506.52
17	B5	25	SCG2	49022.9	10013.6
17	B5	26	SCG2	56602	17640.6
17	B5	27	SCG2	70445	31531.6
17	B5	28	SCG2	94005.9	55140.6
17	B5	29	SCG2	128129	89311.8
17	B5	30	SCG2	168379	129609
17	B5	31	SCG2	206591	167869
17	B5	32	SCG2	236235	197562
17	B5	33	SCG2	257829	219204
17	B5	34	SCG2	274432	235855
17	B5	35	SCG2	286792	248263
17	B5	36	SCG2	295803	257322
17	B5	37	SCG2	302104	263671
17	B5	38	SCG2	306347	267962
17	B5	39	SCG2	308889	270552
17	B5	40	SCG2	311044	272755
18	B6	1	SCG2	39176	-180.281
18	B6	2	SCG2	39195.4	-124.383
18	B6	3	SCG2	39198.8	-84.4652
18	B6	4	SCG2	39388.3	141.531
18	B6	5	SCG2	39226.9	16.5341
18	B6	6	SCG2	39090.5	-83.3921
18	B6	7	SCG2	39004.2	-133.185
18	B6	8	SCG2	39002.4	-98.4787
18	B6	9	SCG2	39280.4	215.997
18	B6	10	SCG2	39244.2	216.243
18	B6	11	SCG2	38877.6	-113.859
18	B6	12	SCG2	38778.6	-176.363
18	B6	13	SCG2	38898.1	-20.3985
18	B6	14	SCG2	38833.8	-48.184
18	B6	15	SCG2	38843.7	-1.84838
18	B6	16	SCG2	39107.1	298.038
18	B6	17	SCG2	38915.9	143.362
18	B6	18	SCG2	38727.8	-8.29085
18	B6	19	SCG2	38436.4	-263.24
18	B6	20	SCG2	38561.4	-101.737
18	B6	21	SCG2	39634.2	1007.56
18	B6	22	SCG2	41157.1	2566.92
18	B6	23	SCG2	42856.3	4302.59
18	B6	24	SCG2	46556.4	8039.18
18	B6	25	SCG2	53078.5	14597.8
18	B6	26	SCG2	65614.8	27170.5
18	B6	27	SCG2	86477.2	48069.4
18	B6	28	SCG2	118612	80240.4
18	B6	29	SCG2	160006	121671
18	B6	30	SCG2	203147	164848
18	B6	31	SCG2	238604	200342
18	B6	32	SCG2	264676	226450
18	B6	33	SCG2	283972	245783
18	B6	34	SCG2	298621	260469
18	B6	35	SCG2	309484	271368
18	B6	36	SCG2	316932	278853
18	B6	37	SCG2	322034	283991
18	B6	38	SCG2	326032	288026
18	B6	39	SCG2	328665	290695
18	B6	40	SCG2	330034	292101
19	B7	1	SCG2	45191.1	-293.303
19	B7	2	SCG2	45414.3	19.8014
19	B7	3	SCG2	45774.6	470.117
19	B7	4	SCG2	45604.8	390.241
19	B7	5	SCG2	45073	-51.5689
19	B7	6	SCG2	44847.5	-187.109
19	B7	7	SCG2	44760.7	-183.926
19	B7	8	SCG2	44742.8	-111.83
19	B7	9	SCG2	45028	263.318
19	B7	10	SCG2	44936.4	261.637
19	B7	11	SCG2	44603.6	18.8703
19	B7	12	SCG2	44440.9	-53.9041
19	B7	13	SCG2	44236.8	-168.003
19	B7	14	SCG2	43648.5	-666.414
19	B7	15	SCG2	43556.1	-668.86
19	B7	16	SCG2	43843.1	-291.904
19	B7	17	SCG2	44131.9	86.9189
19	B7	18	SCG2	43926.4	-28.6095
19	B7	19	SCG2	43701.6	-163.462
19	B7	20	SCG2	43667.2	-107.932
19	B7	21	SCG2	43860.5	175.368
19	B7	22	SCG2	44106.8	511.629
19	B7	23	SCG2	44010.6	505.424
19	B7	24	SCG2	44054.3	639.013
19	B7	25	SCG2	44652.8	1327.53
19	B7	26	SCG2	45385.6	2150.27
19	B7	27	SCG2	47282.9	4137.58
19	B7	28	SCG2	50992.5	7937.06
19	B7	29	SCG2	57492.2	14526.7
19	B7	30	SCG2	69558.5	26683.1
19	B7	31	SCG2	90616.2	47830.8
19	B7	32	SCG2	122928	80232.1
19	B7	33	SCG2	164690	122085
19	B7	34	SCG2	208719	166204
19	B7	35	SCG2	246199	203773
19	B7	36	SCG2	273229	230894
19	B7	37	SCG2	293416	251171
19	B7	38	SCG2	309479	267323
19	B7	39	SCG2	320053	277987
19	B7	40	SCG2	327490	285514
20	B8	1	SCG2	41834.1	65.2017
20	B8	2	SCG2	41796.2	138.054
20	B8	3	SCG2	41739.3	191.973
20	B8	4	SCG2	41753	316.395
20	B8	5	SCG2	41633.1	307.306
20	B8	6	SCG2	41456.4	241.4
20	B8	7	SCG2	41023	-81.2199
20	B8	8	SCG2	40791.3	-202.165
20	B8	9	SCG2	40594.8	-287.847
20	B8	10	SCG2	40487.5	-284.374
20	B8	11	SCG2	40533.2	-127.854
20	B8	12	SCG2	40629.8	79.5179
20	B8	13	SCG2	40503.5	63.9795
20	B8	14	SCG2	39728.6	-600.125
20	B8	15	SCG2	39602.1	-615.785
20	B8	16	SCG2	39875.2	-231.944
20	B8	17	SCG2	39985.9	-10.4083
20	B8	18	SCG2	40285.5	399.948
20	B8	19	SCG2	40120.8	346.066
20	B8	20	SCG2	39895.4	231.383
20	B8	21	SCG2	39817	263.755
20	B8	22	SCG2	39858.2	415.751
20	B8	23	SCG2	39955.7	624.057
20	B8	24	SCG2	39861.6	640.753
20	B8	25	SCG2	39982.1	871.984
20	B8	26	SCG2	40923.9	1924.57
20	B8	27	SCG2	42300	3411.55
20	B8	28	SCG2	44927.5	6149.79
20	B8	29	SCG2	49152.4	10485.5
20	B8	30	SCG2	57683.5	19127.4
20	B8	31	SCG2	73618.9	35173.5
20	B8	32	SCG2	99352.1	61017.6
20	B8	33	SCG2	136421	98196.9
20	B8	34	SCG2	180765	142652
20	B8	35	SCG2	223009	185007
20	B8	36	SCG2	255988	218097
20	B8	37	SCG2	280664	242883
20	B8	38	SCG2	299572	261902
20	B8	39	SCG2	313346	275787
20	B8	40	SCG2	322721	285273
21	B9	1	SCG2	22368.2	-275.94
21	B9	2	SCG2	22687.1	116.866
21	B9	3	SCG2	22638.5	142.196
21	B9	4	SCG2	22185.5	-236.991
21	B9	5	SCG2	22098.2	-250.382
21	B9	6	SCG2	22392.5	117.754
21	B9	7	SCG2	22200.7	-0.132535
21	B9	8	SCG2	22207.2	80.2774
21	B9	9	SCG2	22709.5	656.447
21	B9	10	SCG2	22336.3	357.181
21	B9	11	SCG2	21777.5	-127.786
21	B9	12	SCG2	21649.7	-181.649
21	B9	13	SCG2	21727.6	-29.9266
21	B9	14	SCG2	21448.2	-235.419
21	B9	15	SCG2	21358.1	-251.589
21	B9	16	SCG2	21395.6	-140.298
21	B9	17	SCG2	21147.4	-314.519
21	B9	18	SCG2	21130.9	-257.172
21	B9	19	SCG2	21339.6	25.379
21	B9	20	SCG2	21366.9	126.619
21	B9	21	SCG2	21410.7	244.297
21	B9	22	SCG2	21368.3	275.712
21	B9	23	SCG2	21358.1	339.449
21	B9	24	SCG2	21599.4	654.669
21	B9	25	SCG2	22169.2	1298.3
21	B9	26	SCG2	23450.7	2653.71
21	B9	27	SCG2	25758.6	5035.44
21	B9	28	SCG2	29686.7	9037.48
21	B9	29	SCG2	36634	16058.7
21	B9	30	SCG2	49964.2	29462.8
21	B9	31	SCG2	72850.7	52423.2
21	B9	32	SCG2	108232	87878
21	B9	33	SCG2	154291	134011
21	B9	34	SCG2	202800	182594
21	B9	35	SCG2	243643	223511
21	B9	36	SCG2	273258	253199
21	B9	37	SCG2	295241	275257
21	B9	38	SCG2	312343	292432
21	B9	39	SCG2	324584	304747
21	B9	40	SCG2	332516	312754
22	B10	1
22	B10	2
22	B10	3
22	B10	4
22	B10	5
22	B10	6
22	B10	7
22	B10	8
22	B10	9
22	B10	10
22	B10	11
22	B10	12
22	B10	13
22	B10	14
22	B10	15
22	B10	16
22	B10	17
22	B10	18
22	B10	19
22	B10	20
22	B10	21
22	B10	22
22	B10	23
22	B10	24
22	B10	25
22	B10	26
22	B10	27
22	B10	28
22	B10	29
22	B10	30
22	B10	31
22	B10	32
22	B10	33
22	B10	34
22	B10	35
22	B10	36
22	B10	37
22	B10	38
22	B10	39
22	B10	40
23	B11	1
23	B11	2
23	B11	3
23	B11	4
23	B11	5
23	B11	6
23	B11	7
23	B11	8
23	B11	9
23	B11	10
23	B11	11
23	B11	12
23	B11	13
23	B11	14
23	B11	15
23	B11	16
23	B11	17
23	B11	18
23	B11	19
23	B11	20
23	B11	21
23	B11	22
23	B11	23
23	B11	24
23	B11	25
23	B11	26
23	B11	27
23	B11	28
23	B11	29
23	B11	30
23	B11	31
23	B11	32
23	B11	33
23	B11	34
23	B11	35
23	B11	36
23	B11	37
23	B11	38
23	B11	39
23	B11	40
24	B12	1
24	B12	2
24	B12	3
24	B12	4
24	B12	5
24	B12	6
24	B12	7
24	B12	8
24	B12	9
24	B12	10
24	B12	11
24	B12	12
24	B12	13
24	B12	14
24	B12	15
24	B12	16
24	B12	17
24	B12	18
24	B12	19
24	B12	20
24	B12	21
24	B12	22
24	B12	23
24	B12	24
24	B12	25
24	B12	26
24	B12	27
24	B12	28
24	B12	29
24	B12	30
24	B12	31
24	B12	32
24	B12	33
24	B12	34
24	B12	35
24	B12	36
24	B12	37
24	B12	38
24	B12	39
24	B12	40
25	C1	1	SCG2	51528.7	246.109
25	C1	2	SCG2	51452	191.713
25	C1	3	SCG2	51373.7	135.563
25	C1	4	SCG2	51421.8	205.909
25	C1	5	SCG2	50941.7	-251.956
25	C1	6	SCG2	50435.2	-736.192
25	C1	7	SCG2	50495.2	-653.974
25	C1	8	SCG2	51207.9	80.9655
25	C1	9	SCG2	51370.4	265.722
25	C1	10	SCG2	51613.8	531.42
25	C1	11	SCG2	51657.2	597.078
25	C1	12	SCG2	51616.6	578.69
25	C1	13	SCG2	51384.6	368.907
25	C1	14	SCG2	50808.5	-184.938
25	C1	15	SCG2	50742.7	-228.475
25	C1	16	SCG2	51032.7	83.7231
25	C1	17	SCG2	50404.2	-522.474
25	C1	18	SCG2	50285.9	-618.573
25	C1	19	SCG2	50693.4	-188.828
25	C1	20	SCG2	51267.4	407.354
25	C1	21	SCG2	51202.7	364.934
25	C1	22	SCG2	50580.7	-234.856
25	C1	23	SCG2	50640.3	-152.998
25	C1	24	SCG2	51600.4	829.363
25	C1	25	SCG2	51777.3	1028.53
25	C1	26	SCG2	52189.9	1463.33
25	C1	27	SCG2	54363.4	3659.09
25	C1	28	SCG2	57903.9	7221.81
25	C1	29	SCG2	65015.8	14356
25	C1	30	SCG2	77216.9	26579.3
25	C1	31	SCG2	98298.3	47683
25	C1	32	SCG2	128197	77604.4
25	C1	33	SCG2	161131	110560
25	C1	34	SCG2	191517	140968
25	C1	35	SCG2	219166	168640
25	C1	36	SCG2	242204	191700
25	C1	37	SCG2	259230	208748
25	C1	38	SCG2	270797	220337
25	C1	39	SCG2	278691	228254
25	C1	40	SCG2	284176	233761
26	C2	1	SCG2	47662.8	-394.563
26	C2	2	SCG2	47685.3	-359.652
26	C2	3	SCG2	47985.2	-47.4406
26	C2	4	SCG2	48021.9	1.58712
26	C2	5	SCG2	48019.1	11.1501
26	C2	6	SCG2	47850.4	-145.201
26	C2	7	SCG2	47800.5	-182.794
26	C2	8	SCG2	47958	-12.9502
26	C2	9	SCG2	48197.5	238.913
26	C2	10	SCG2	48305.2	358.875
26	C2	11	SCG2	48265.8	331.844
26	C2	12	SCG2	48192	270.344
26	C2	13	SCG2	47795.4	-113.897
26	C2	14	SCG2	47682.5	-214.479
26	C2	15	SCG2	47697.5	-187.096
26	C2	16	SCG2	47603.8	-268.474
26	C2	17	SCG2	47583.5	-276.439
26	C2	18	SCG2	47660.7	-186.915
26	C2	19	SCG2	47837.7	2.48414
26	C2	20	SCG2	47829.2	6.28535
26	C2	21	SCG2	47850.9	40.278
26	C2	22	SCG2	48066.7	268.485
26	C2	23	SCG2	47891.4	105.439
26	C2	24	SCG2	47947	173.408
26	C2	25	SCG2	48612.1	850.842
26	C2	26	SCG2	49166.4	1417.54
26	C2	27	SCG2	50080.4	2343.8
26	C2	28	SCG2	51549.3	3825.05
26	C2	29	SCG2	55398.1	7686.16
26	C2	30	SCG2	62260.4	14560.8
26	C2	31	SCG2	74364.2	26676.9
26	C2	32	SCG2	94680.5	47005.6
26	C2	33	SCG2	126091	78428.5
26	C2	34	SCG2	164995	117345
26	C2	35	SCG2	204920	157282
26	C2	36	SCG2	238122	190496
26	C2	37	SCG2	263630	216017
26	C2	38	SCG2	282272	234671
26	C2	39	SCG2	296115	248527
26	C2	40	SCG2	304830	257254
27	C3	1	SCG2	42799.1	-286.796
27	C3	2	SCG2	42773.3	-304.524
27	C3	3	SCG2	42837.1	-232.6
27	C3	4	SCG2	43226.5	164.883
27	C3	5	SCG2	43178.7	125.135
27	C3	6	SCG2	43046.2	0.700314
27	C3	7	SCG2	42865.8	-171.618
27	C3	8	SCG2	42899.3	-130.076
27	C3	9	SCG2	43301.6	280.278
27	C3	10	SCG2	43262.6	249.374
27	C3	11	SCG2	43153.9	148.728
27	C3	12	SCG2	43076.3	79.2223
27	C3	13	SCG2	42941.9	-47.123
27	C3	14	SCG2	42653.1	-327.886
27	C3	15	SCG2	42635.1	-337.79
27	C3	16	SCG2	42861.2	-103.655
27	C3	17	SCG2	42965.6	8.8356
27	C3	18	SCG2	42949.5	0.841861
27	C3	19	SCG2	42969.5	28.8911
27	C3	20	SCG2	43180.1	247.597
27	C3	21	SCG2	42972.7	48.2474
27	C3	22	SCG2	42884.4	-31.9847
27	C3	23	SCG2	42950.4	42.0763
27	C3	24	SCG2	42990.3	90.0005
27	C3	25	SCG2	43441	548.796
27	C3	26	SCG2	44405.9	1521.78
27	C3	27	SCG2	45308.6	2432.53
27	C3	28	SCG2	47007.6	4139.64
27	C3	29	SCG2	50841	7981.05
27	C3	30	SCG2	57944.1	15092.2
27	C3	31	SCG2	69909.1	27065.4
27	C3	32	SCG2	90581.8	47746.1
27	C3	33	SCG2	122043	79215.2
27	C3	34	SCG2	160385	117566
27	C3	35	SCG2	197309	154498
27	C3	36	SCG2	226192	183389
27	C3	37	SCG2	248905	206109
27	C3	38	SCG2	266831	224044
27	C3	39	SCG2	279558	236779
27	C3	40	SCG2	287834	245063
28	C4	1	SCG2	42985.9	-225.725
28	C4	2	SCG2	42872	-390.51
28	C4	3	SCG2	42969.6	-343.819
28	C4	4	SCG2	43573.5	209.111
28	C4	5	SCG2	43603.8	188.458
28	C4	6	SCG2	43460.5	-5.74472
28	C4	7	SCG2	43381.6	-135.577
28	C4	8	SCG2	43420.7	-147.386
28	C4	9	SCG2	43485.8	-133.194
28	C4	10	SCG2	43551.7	-118.226
28	C4	11	SCG2	44002.8	281.915
28	C4	12	SCG2	44119.1	347.36
28	C4	13	SCG2	44040.9	218.177
28	C4	14	SCG2	44021.7	148.106
28	C4	15	SCG2	43891.9	-32.6673
28	C4	16	SCG2	43767.6	-207.902
28	C4	17	SCG2	43757.8	-268.613
28	C4	18	SCG2	43975.8	-101.562
28	C4	19	SCG2	44007.6	-120.66
28	C4	20	SCG2	44198.6	19.4025
28	C4	21	SCG2	44242.4	12.2657
28	C4	22	SCG2	44888.3	607.231
28	C4	23	SCG2	46504.7	2172.7
28	C4	24	SCG2	48068.6	3685.73
28	C4	25	SCG2	51141.6	6707.84
28	C4	26	SCG2	56590	12105.3
28	C4	27	SCG2	67391.7	22856
28	C4	28	SCG2	85346.7	40760.1
28	C4	29	SCG2	113932	69294.6
28	C4	30	SCG2	152383	107694
28	C4	31	SCG2	193117	148378
28	C4	32	SCG2	228108	183317
28	C4	33	SCG2	254363	209522
28	C4	34	SCG2	273953	229060
28	C4	35	SCG2	288875	243932
28	C4	36	SCG2	299350	254356
28	C4	37	SCG2	307428	262384
28	C4	38	SCG2	312610	267514
28	C4	39	SCG2	315764	270617
28	C4	40	SCG2	318100	272903
29	C5	1	SCG2	42519.5	121.235
29	C5	2	SCG2	42497.2	189.274
29	C5	3	SCG2	42419.5	201.899
29	C5	4	SCG2	42428.2	300.832
29	C5	5	SCG2	42142.6	105.566
29	C5	6	SCG2	41840.7	-105.966
29	C5	7	SCG2	41724.8	-131.56
29	C5	8	SCG2	41768.6	2.56106
29	C5	9	SCG2	41648.6	-27.1385
29	C5	10	SCG2	41041.4	-544.026
29	C5	11	SCG2	40995.2	-499.85
29	C5	12	SCG2	41413.8	9.06368
29	C5	13	SCG2	41451.2	136.759
29	C5	14	SCG2	41383.6	159.508
29	C5	15	SCG2	41269.9	136.129
29	C5	16	SCG2	41178.7	135.234
29	C5	17	SCG2	41074.1	120.988
29	C5	18	SCG2	41036.9	174.101
29	C5	19	SCG2	41159.3	386.804
29	C5	20	SCG2	41592.1	909.932
29	C5	21	SCG2	42205.3	1613.44
29	C5	22	SCG2	42666.7	2165.23
29	C5	23	SCG2	43883.2	3472.02
29	C5	24	SCG2	45760.3	5439.49
29	C5	25	SCG2	49906.9	9676.4
29	C5	26	SCG2	57772.8	17632.6
29	C5	27	SCG2	71340.9	31291
29	C5	28	SCG2	93717.8	53758.3
29	C5	29	SCG2	127289	87419.7
29	C5	30	SCG2	168380	128601
29	C5	31	SCG2	208052	168363
29	C5	32	SCG2	239483	199885
29	C5	33	SCG2	263132	223624
29	C5	34	SCG2	280239	240821
29	C5	35	SCG2	292792	253464
29	C5	36	SCG2	301593	262356
29	C5	37	SCG2	308081	268934
29	C5	38	SCG2	313155	274098
29	C5	39	SCG2	316538	277572
29	C5	40	SCG2	319230	280355
30	C6	1	SCG2	39599.2	-446.616
30	C6	2	SCG2	39734.1	-325.23
30	C6	3	SCG2	40072	-0.864057
30	C6	4	SCG2	40107.6	21.1391
30	C6	5	SCG2	40243.1	143.103
30	C6	6	SCG2	40342	228.501
30	C6	7	SCG2	40097	-30.0156
30	C6	8	SCG2	39974.4	-166.2
30	C6	9	SCG2	40035.9	-118.166
30	C6	10	SCG2	40246.3	78.7086
30	C6	11	SCG2	40201.1	19.8954
30	C6	12	SCG2	40067.5	-127.242
30	C6	13	SCG2	39974.8	-233.485
30	C6	14	SCG2	39989.8	-231.97
30	C6	15	SCG2	40200.4	-34.8968
30	C6	16	SCG2	40339.3	90.4657
30	C6	17	SCG2	40446.3	183.906
30	C6	18	SCG2	40453	177.12
30	C6	19	SCG2	40572.8	283.35
30	C6	20	SCG2	41127.4	824.424
30	C6	21	SCG2	41563.7	1247.14
30	C6	22	SCG2	42421.5	2091.44
30	C6	23	SCG2	44198.6	3855.03
30	C6	24	SCG2	47472.1	7114.98
30	C6	25	SCG2	53640.4	13269.7
30	C6	26	SCG2	63998.9	23614.7
30	C6	27	SCG2	83040.9	42643.1
30	C6	28	SCG2	112564	72153.1
30	C6	29	SCG2	152010	111585
30	C6	30	SCG2	194673	154235
30	C6	31	SCG2	232277	191825
30	C6	32	SCG2	259665	219199
30	C6	33	SCG2	279892	239413
30	C6	34	SCG2	294922	254429
30	C6	35	SCG2	306122	265616
30	C6	36	SCG2	314154	273634
30	C6	37	SCG2	319888	279354
30	C6	38	SCG2	323549	283003
30	C6	39	SCG2	326764	286203
30	C6	40	SCG2	328896	288323
31	C7	1	SCG2	29556	-30.9947
31	C7	2	SCG2	29618.5	58.9963
31	C7	3	SCG2	29719.7	187.706
31	C7	4	SCG2	29873.2	368.674
31	C7	5	SCG2	29770.3	293.348
31	C7	6	SCG2	29528.2	78.7086
31	C7	7	SCG2	29408.1	-13.8961
31	C7	8	SCG2	29410	15.5501
31	C7	9	SCG2	29359.1	-7.82217
31	C7	10	SCG2	29424	84.5615
31	C7	11	SCG2	29407.2	95.2498
31	C7	12	SCG2	29056.9	-227.496
31	C7	13	SCG2	28921.7	-335.256
31	C7	14	SCG2	28929.2	-300.248
31	C7	15	SCG2	28828.2	-373.739
31	C7	16	SCG2	28529.6	-644.822
31	C7	17	SCG2	28564	-582.915
31	C7	18	SCG2	28986.2	-133.11
31	C7	19	SCG2	29041.8	-50.0289
31	C7	20	SCG2	29053.5	-10.8816
31	C7	21	SCG2	29152.4	115.584
31	C7	22	SCG2	29713.9	704.606
31	C7	23	SCG2	29718	736.226
31	C7	24	SCG2	29659.2	704.922
31	C7	25	SCG2	30087.6	1160.83
31	C7	26	SCG2	31321	2421.71
31	C7	27	SCG2	33517.4	4645.68
31	C7	28	SCG2	37462.1	8617.86
31	C7	29	SCG2	45550	16733.3
31	C7	30	SCG2	59357.2	30567.9
31	C7	31	SCG2	82298.2	53536.5
31	C7	32	SCG2	114450	85716.2
31	C7	33	SCG2	151981	123275
31	C7	34	SCG2	186941	158261
31	C7	35	SCG2	218459	189807
31	C7	36	SCG2	245158	216534
31	C7	37	SCG2	264463	235866
31	C7	38	SCG2	277525	248956
31	C7	39	SCG2	285932	257391
31	C7	40	SCG2	291460	262946
32	C8	1	SCG2	56805	2586.35
32	C8	2	SCG2	56116.9	2150.99
32	C8	3	SCG2	55298	1584.93
32	C8	4	SCG2	54032.9	572.482
32	C8	5	SCG2	53521.6	313.97
32	C8	6	SCG2	53086.2	131.336
32	C8	7	SCG2	52335.9	-366.281
32	C8	8	SCG2	52035.4	-413.969
32	C8	9	SCG2	51812.4	-384.29
32	C8	10	SCG2	51179.5	-764.427
32	C8	11	SCG2	50978.7	-712.483
32	C8	12	SCG2	51079.4	-359.085
32	C8	13	SCG2	50901.1	-284.652
32	C8	14	SCG2	50386.4	-546.523
32	C8	15	SCG2	50025.6	-654.633
32	C8	16	SCG2	49967.3	-460.145
32	C8	17	SCG2	50040.8	-133.966
32	C8	18	SCG2	49858.1	-63.9198
32	C8	19	SCG2	49962.5	293.248
32	C8	20	SCG2	50520.9	1104.39
32	C8	21	SCG2	50307.8	1144.02
32	C8	22	SCG2	50219.5	1308.5
32	C8	23	SCG2	50399.2	1740.87
32	C8	24	SCG2	50585.9	2180.34
32	C8	25	SCG2	51479.8	3327.04
32	C8	26	SCG2	52448.1	4548.04
32	C8	27	SCG2	54653	7005.69
32	C8	28	SCG2	59026.8	11632.3
32	C8	29	SCG2	66861.3	19719.5
32	C8	30	SCG2	80746.2	33857.1
32	C8	31	SCG2	104106	57469.6
32	C8	32	SCG2	138881	92497.2
32	C8	33	SCG2	180406	134275
32	C8	34	SCG2	218927	173049
32	C8	35	SCG2	251357	205732
32	C8	36	SCG2	279500	234127
32	C8	37	SCG2	300657	255537
32	C8	38	SCG2	315820	270953
32	C8	39	SCG2	325991	281377
32	C8	40	SCG2	332167	287806
33	C9	1	SCG2	45847.3	-646.102
33	C9	2	SCG2	45876.7	-603.251
33	C9	3	SCG2	46247.4	-219.072
33	C9	4	SCG2	46485.3	32.2313
33	C9	5	SCG2	46381	-58.59
33	C9	6	SCG2	46217.6	-208.54
33	C9	7	SCG2	46230.1	-182.561
33	C9	8	SCG2	46610.3	211.044
33	C9	9	SCG2	46774	388.223
33	C9	10	SCG2	46706	333.632
33	C9	11	SCG2	46542.8	183.896
33	C9	12	SCG2	46115.4	-230.038
33	C9	13	SCG2	46149.4	-182.563
33	C9	14	SCG2	46682.5	364.014
33	C9	15	SCG2	46247	-58.0529
33	C9	16	SCG2	46072.3	-219.343
33	C9	17	SCG2	46155.6	-122.563
33	C9	18	SCG2	46290.9	26.2137
33	C9	19	SCG2	46254.2	2.93149
33	C9	20	SCG2	46176.9	-60.8625
33	C9	21	SCG2	46228.3	3.99203
33	C9	22	SCG2	46798.2	587.335
33	C9	23	SCG2	47428.4	1230.95
33	C9	24	SCG2	47559.2	1375.19
33	C9	25	SCG2	47910.5	1739.95
33	C9	26	SCG2	49001.6	2844.46
33	C9	27	SCG2	51449.7	5306.08
33	C9	28	SCG2	55701.6	9571.46
33	C9	29	SCG2	63694.7	17578
33	C9	30	SCG2	78139.3	32036
33	C9	31	SCG2	102778	56688.3
33	C9	32	SCG2	139919	93842.6
33	C9	33	SCG2	187335	141272
33	C9	34	SCG2	235845	189796
33	C9	35	SCG2	275700	229664
33	C9	36	SCG2	304170	258147
33	C9	37	SCG2	325583	279574
33	C9	38	SCG2	342202	296207
33	C9	39	SCG2	353986	308004
33	C9	40	SCG2	361647	315678
34	C10	1
34	C10	2
34	C10	3
34	C10	4
34	C10	5
34	C10	6
34	C10	7
34	C10	8
34	C10	9
34	C10	10
34	C10	11
34	C10	12
34	C10	13
34	C10	14
34	C10	15
34	C10	16
34	C10	17
34	C10	18
34	C10	19
34	C10	20
34	C10	21
34	C10	22
34	C10	23
34	C10	24
34	C10	25
34	C10	26
34	C10	27
34	C10	28
34	C10	29
34	C10	30
34	C10	31
34	C10	32
34	C10	33
34	C10	34
34	C10	35
34	C10	36
34	C10	37
34	C10	38
34	C10	39
34	C10	40
35	C11	1
35	C11	2
35	C11	3
35	C11	4
35	C11	5
35	C11	6
35	C11	7
35	C11	8
35	C11	9
35	C11	10
35	C11	11
35	C11	12
35	C11	13
35	C11	14
35	C11	15
35	C11	16
35	C11	17
35	C11	18
35	C11	19
35	C11	20
35	C11	21
35	C11	22
35	C11	23
35	C11	24
35	C11	25
35	C11	26
35	C11	27
35	C11	28
35	C11	29
35	C11	30
35	C11	31
35	C11	32
35	C11	33
35	C11	34
35	C11	35
35	C11	36
35	C11	37
35	C11	38
35	C11	39
35	C11	40
36	C12	1
36	C12	2
36	C12	3
36	C12	4
36	C12	5
36	C12	6
36	C12	7
36	C12	8
36	C12	9
36	C12	10
36	C12	11
36	C12	12
36	C12	13
36	C12	14
36	C12	15
36	C12	16
36	C12	17
36	C12	18
36	C12	19
36	C12	20
36	C12	21
36	C12	22
36	C12	23
36	C12	24
36	C12	25
36	C12	26
36	C12	27
36	C12	28
36	C12	29
36	C12	30
36	C12	31
36	C12	32
36	C12	33
36	C12	34
36	C12	35
36	C12	36
36	C12	37
36	C12	38
36	C12	39
36	C12	40
37	D1	1	ACTIN	45201.9	335.938
37	D1	2	ACTIN	45468.2	571.69
37	D1	3	ACTIN	45366.8	439.77
37	D1	4	ACTIN	45011.5	54.0103
37	D1	5	ACTIN	44570.2	-417.741
37	D1	6	ACTIN	44587.4	-431.048
37	D1	7	ACTIN	45038.7	-10.2139
37	D1	8	ACTIN	45155.3	75.8663
37	D1	9	ACTIN	45399.3	289.357
37	D1	10	ACTIN	45536.3	395.894
37	D1	11	ACTIN	46183.8	1012.93
37	D1	12	ACTIN	47480.2	2278.86
37	D1	13	ACTIN	49554.8	4322.99
37	D1	14	ACTIN	54281.6	9019.3
37	D1	15	ACTIN	62509.6	17216.8
37	D1	16	ACTIN	76583.5	31260.2
37	D1	17	ACTIN	99680.2	54326.4
37	D1	18	ACTIN	134305	88921.1
37	D1	19	ACTIN	175861	130446
37	D1	20	ACTIN	216404	170959
37	D1	21	ACTIN	247230	201754
37	D1	22	ACTIN	268092	222586
37	D1	23	ACTIN	282417	236881
37	D1	24	ACTIN	293214	247647
37	D1	25	ACTIN	300588	254991
37	D1	26	ACTIN	306462	260834
37	D1	27	ACTIN	311195	265536
37	D1	28	ACTIN	314758	269069
37	D1	29	ACTIN	317126	271406
37	D1	30	ACTIN	319616	273866
37	D1	31	ACTIN	321361	275580
37	D1	32	ACTIN	322026	276215
37	D1	33	ACTIN	323257	277416
37	D1	34	ACTIN	323341	277469
37	D1	35	ACTIN	323642	277739
37	D1	36	ACTIN	322898	276965
37	D1	37	ACTIN	321568	275604
37	D1	38	ACTIN	322029	276035
37	D1	39	ACTIN	322214	276190
37	D1	40	ACTIN	321249	275194
38	D2	1	ACTIN	40219.6	658.95
38	D2	2	ACTIN	40226.1	493.689
38	D2	3	ACTIN	40110.9	206.69
38	D2	4	ACTIN	39826.7	-249.235
38	D2	5	ACTIN	39947.2	-300.449
38	D2	6	ACTIN	40693.8	274.372
38	D2	7	ACTIN	40788.7	197.596
38	D2	8	ACTIN	40752.4	-10.4777
38	D2	9	ACTIN	40816.1	-118.496
38	D2	10	ACTIN	40905.5	-200.91
38	D2	11	ACTIN	41597.8	319.658
38	D2	12	ACTIN	42415.8	965.971
38	D2	13	ACTIN	44049	2427.4
38	D2	14	ACTIN	47544.5	5751.16
38	D2	15	ACTIN	53779.3	11814.2
38	D2	16	ACTIN	65132.8	22995.9
38	D2	17	ACTIN	83603.6	41295
38	D2	18	ACTIN	112547	70066.9
38	D2	19	ACTIN	149289	106636
38	D2	20	ACTIN	187800	144976
38	D2	21	ACTIN	219404	176408
38	D2	22	ACTIN	241547	198380
38	D2	23	ACTIN	256313	212974
38	D2	24	ACTIN	267059	223548
38	D2	25	ACTIN	274588	230905
38	D2	26	ACTIN	280595	236740
38	D2	27	ACTIN	284894	240868
38	D2	28	ACTIN	288553	244355
38	D2	29	ACTIN	291553	247184
38	D2	30	ACTIN	293740	249199
38	D2	31	ACTIN	294712	249999
38	D2	32	ACTIN	295938	251054
38	D2	33	ACTIN	296625	251569
38	D2	34	ACTIN	297164	251935
38	D2	35	ACTIN	297235	251835
38	D2	36	ACTIN	296961	251389
38	D2	37	ACTIN	296400	250657
38	D2	38	ACTIN	296656	250741
38	D2	39	ACTIN	295529	249442
38	D2	40	ACTIN	295143	248884
39	D3	1	ACTIN	29717.9	96.3041
39	D3	2	ACTIN	29756.4	96.4503
39	D3	3	ACTIN	29750.4	52.0594
39	D3	4	ACTIN	29567.9	-168.783
39	D3	5	ACTIN	29630.1	-144.953
39	D3	6	ACTIN	30063.2	249.816
39	D3	7	ACTIN	30060.5	208.808
39	D3	8	ACTIN	29834.3	-55.6978
39	D3	9	ACTIN	29787.1	-141.251
39	D3	10	ACTIN	30106	139.239
39	D3	11	ACTIN	30767.7	762.686
39	D3	12	ACTIN	31116.6	1073.21
39	D3	13	ACTIN	32698.7	2617
39	D3	14	ACTIN	35577.4	5457.3
39	D3	15	ACTIN	40608.7	10450.2
39	D3	16	ACTIN	49899.1	19702.3
39	D3	17	ACTIN	66293.2	36058.1
39	D3	18	ACTIN	92604.9	62331.5
39	D3	19	ACTIN	129350	99038.1
39	D3	20	ACTIN	170749	140399
39	D3	21	ACTIN	207680	177292
39	D3	22	ACTIN	234361	203934
39	D3	23	ACTIN	251957	221492
39	D3	24	ACTIN	263887	233383
39	D3	25	ACTIN	273240	242698
39	D3	26	ACTIN	280119	249538
39	D3	27	ACTIN	285702	255083
39	D3	28	ACTIN	289139	258482
39	D3	29	ACTIN	292247	261552
39	D3	30	ACTIN	294802	264068
39	D3	31	ACTIN	296438	265666
39	D3	32	ACTIN	298034	267224
39	D3	33	ACTIN	298896	268047
39	D3	34	ACTIN	299082	268195
39	D3	35	ACTIN	299208	268282
39	D3	36	ACTIN	299337	268373
39	D3	37	ACTIN	299398	268396
39	D3	38	ACTIN	299210	268170
39	D3	39	ACTIN	298937	267859
39	D3	40	ACTIN	298811	267694
40	D4	1	ACTIN	38063.8	56.6629
40	D4	2	ACTIN	38229.2	2.59661
40	D4	3	ACTIN	38584.6	138.515
40	D4	4	ACTIN	38657.8	-7.70394
40	D4	5	ACTIN	38679.1	-205.762
40	D4	6	ACTIN	38993.6	-110.794
40	D4	7	ACTIN	39500.9	177.117
40	D4	8	ACTIN	39551.8	8.62853
40	D4	9	ACTIN	39812.7	50.0505
40	D4	10	ACTIN	40618.1	635.996
40	D4	11	ACTIN	42118	1916.46
40	D4	12	ACTIN	44132.5	3711.6
40	D4	13	ACTIN	47484.1	6843.73
40	D4	14	ACTIN	54494	13634.2
40	D4	15	ACTIN	67288.6	26209.3
40	D4	16	ACTIN	88070	46771.3
40	D4	17	ACTIN	119719	78201.3
40	D4	18	ACTIN	160456	118719
40	D4	19	ACTIN	202042	160085
40	D4	20	ACTIN	235950	193774
40	D4	21	ACTIN	259489	217093
40	D4	22	ACTIN	274946	232331
40	D4	23	ACTIN	285583	242749
40	D4	24	ACTIN	293336	250282
40	D4	25	ACTIN	299089	255815
40	D4	26	ACTIN	303552	260059
40	D4	27	ACTIN	307145	263433
40	D4	28	ACTIN	309954	266022
40	D4	29	ACTIN	311745	267594
40	D4	30	ACTIN	313092	268721
40	D4	31	ACTIN	313739	269149
40	D4	32	ACTIN	314395	269586
40	D4	33	ACTIN	314624	269595
40	D4	34	ACTIN	314102	268853
40	D4	35	ACTIN	313745	268277
40	D4	36	ACTIN	313406	267718
40	D4	37	ACTIN	312993	267086
40	D4	38	ACTIN	313204	267078
40	D4	39	ACTIN	312696	266350
40	D4	40	ACTIN	312627	266062
41	D5	1	ACTIN	41192.5	-472.043
41	D5	2	ACTIN	41318.6	-146.24
41	D5	3	ACTIN	41213.7	-51.5314
41	D5	4	ACTIN	41040.7	-24.9866
41	D5	5	ACTIN	40940	73.9685
41	D5	6	ACTIN	40806.2	139.849
41	D5	7	ACTIN	40322.8	-144
41	D5	8	ACTIN	40273.8	6.70071
41	D5	9	ACTIN	40601	533.511
41	D5	10	ACTIN	40947.1	1079.24
41	D5	11	ACTIN	41571.8	1903.53
41	D5	12	ACTIN	42089.8	2621.09
41	D5	13	ACTIN	44091	4821.99
41	D5	14	ACTIN	47449.9	8380.5
41	D5	15	ACTIN	53800.4	14930.6
41	D5	16	ACTIN	65776.5	27106.3
41	D5	17	ACTIN	86598.1	48127.6
41	D5	18	ACTIN	118017	79745.8
41	D5	19	ACTIN	159677	121606
41	D5	20	ACTIN	204262	166390
41	D5	21	ACTIN	242130	204458
41	D5	22	ACTIN	268798	231326
41	D5	23	ACTIN	286782	249509
41	D5	24	ACTIN	298784	261710
41	D5	25	ACTIN	307810	270936
41	D5	26	ACTIN	314600	277926
41	D5	27	ACTIN	319871	283397
41	D5	28	ACTIN	323438	287164
41	D5	29	ACTIN	326322	290247
41	D5	30	ACTIN	328988	293113
41	D5	31	ACTIN	330247	294571
41	D5	32	ACTIN	331469	295993
41	D5	33	ACTIN	332150	296874
41	D5	34	ACTIN	332083	297006
41	D5	35	ACTIN	332125	297248
41	D5	36	ACTIN	332098	297421
41	D5	37	ACTIN	332108	297630
41	D5	38	ACTIN	332081	297803
41	D5	39	ACTIN	331403	297324
41	D5	40	ACTIN	330844	296965
42	D6	1	ACTIN	32749.3	28.8216
42	D6	2	ACTIN	32972.5	85.512
42	D6	3	ACTIN	33090.4	36.9993
42	D6	4	ACTIN	33100.4	-119.424
42	D6	5	ACTIN	33397.7	11.3605
42	D6	6	ACTIN	33645.2	92.4611
42	D6	7	ACTIN	33792.9	73.6945
42	D6	8	ACTIN	33790.6	-95.0917
42	D6	9	ACTIN	34102.7	50.5557
42	D6	10	ACTIN	34531.5	312.855
42	D6	11	ACTIN	34922.3	537.179
42	D6	12	ACTIN	36651.8	2100.22
42	D6	13	ACTIN	39346.6	4628.56
42	D6	14	ACTIN	44126	9241.54
42	D6	15	ACTIN	53968.4	18917.5
42	D6	16	ACTIN	70297.4	35080
42	D6	17	ACTIN	97203.3	61819.4
42	D6	18	ACTIN	135555	100005
42	D6	19	ACTIN	179828	144111
42	D6	20	ACTIN	221453	185569
42	D6	21	ACTIN	252479	216430
42	D6	22	ACTIN	273401	237185
42	D6	23	ACTIN	287420	251037
42	D6	24	ACTIN	297293	260744
42	D6	25	ACTIN	304943	268227
42	D6	26	ACTIN	310646	273764
42	D6	27	ACTIN	315737	278689
42	D6	28	ACTIN	318722	281507
42	D6	29	ACTIN	320779	283398
42	D6	30	ACTIN	322533	284985
42	D6	31	ACTIN	323600	285886
42	D6	32	ACTIN	324224	286344
42	D6	33	ACTIN	324977	286930
42	D6	34	ACTIN	324694	286481
42	D6	35	ACTIN	324958	286577
42	D6	36	ACTIN	324741	286195
42	D6	37	ACTIN	324411	285698
42	D6	38	ACTIN	324051	285172
42	D6	39	ACTIN	323371	284325
42	D6	40	ACTIN	323328	284115
43	D7	1	ACTIN	35576.3	-670.267
43	D7	2	ACTIN	35964.3	-559.216
43	D7	3	ACTIN	36820.9	20.5654
43	D7	4	ACTIN	37154	76.7494
43	D7	5	ACTIN	37126.6	-227.539
43	D7	6	ACTIN	37462.9	-168.152
43	D7	7	ACTIN	38236	328.044
43	D7	8	ACTIN	38309.3	124.435
43	D7	9	ACTIN	38434.6	-27.1508
43	D7	10	ACTIN	38611.7	-126.951
43	D7	11	ACTIN	39154	138.44
43	D7	12	ACTIN	40375.2	1082.75
43	D7	13	ACTIN	41827.7	2258.32
43	D7	14	ACTIN	45413.4	5567.11
43	D7	15	ACTIN	51852.3	11729.1
43	D7	16	ACTIN	63747.2	23347.1
43	D7	17	ACTIN	83742.5	43065.5
43	D7	18	ACTIN	115864	74910.4
43	D7	19	ACTIN	159791	118560
43	D7	20	ACTIN	209629	168122
43	D7	21	ACTIN	254057	212273
43	D7	22	ACTIN	286523	244462
43	D7	23	ACTIN	307740	265402
43	D7	24	ACTIN	321595	278980
43	D7	25	ACTIN	331834	288942
43	D7	26	ACTIN	340338	297169
43	D7	27	ACTIN	346513	303067
43	D7	28	ACTIN	350738	307015
43	D7	29	ACTIN	354220	310220
43	D7	30	ACTIN	356792	312515
43	D7	31	ACTIN	358689	314135
43	D7	32	ACTIN	359739	314908
43	D7	33	ACTIN	360509	315402
43	D7	34	ACTIN	360728	315344
43	D7	35	ACTIN	360915	315254
43	D7	36	ACTIN	360729	314791
43	D7	37	ACTIN	360259	314044
43	D7	38	ACTIN	359686	313194
43	D7	39	ACTIN	359313	312544
43	D7	40	ACTIN	358993	311948
44	D8	1	ACTIN	32369.8	-940.286
44	D8	2	ACTIN	32772.9	-655.244
44	D8	3	ACTIN	33436.9	-109.372
44	D8	4	ACTIN	33904.8	240.426
44	D8	5	ACTIN	33837.7	55.1692
44	D8	6	ACTIN	33708.2	-192.369
44	D8	7	ACTIN	33864.4	-154.298
44	D8	8	ACTIN	34256	119.125
44	D8	9	ACTIN	34296.3	41.3177
44	D8	10	ACTIN	34655.7	282.67
44	D8	11	ACTIN	35193.2	702.054
44	D8	12	ACTIN	35689.1	1079.84
44	D8	13	ACTIN	36775.4	2047.98
44	D8	14	ACTIN	39495.3	4649.83
44	D8	15	ACTIN	44799.7	9836.07
44	D8	16	ACTIN	53613.8	18532.1
44	D8	17	ACTIN	69698.8	34499
44	D8	18	ACTIN	96147.9	60830
44	D8	19	ACTIN	135505	100069
44	D8	20	ACTIN	183099	147545
44	D8	21	ACTIN	229776	194104
44	D8	22	ACTIN	266012	230221
44	D8	23	ACTIN	291179	255271
44	D8	24	ACTIN	307395	271369
44	D8	25	ACTIN	319022	282878
44	D8	26	ACTIN	328513	292250
44	D8	27	ACTIN	335118	298738
44	D8	28	ACTIN	339782	303283
44	D8	29	ACTIN	343725	307108
44	D8	30	ACTIN	347108	310373
44	D8	31	ACTIN	348967	312114
44	D8	32	ACTIN	350384	313412
44	D8	33	ACTIN	351509	314420
44	D8	34	ACTIN	351867	314659
44	D8	35	ACTIN	352229	314903
44	D8	36	ACTIN	352238	314794
44	D8	37	ACTIN	351621	314059
44	D8	38	ACTIN	351651	313971
44	D8	39	ACTIN	351712	313914
44	D8	40	ACTIN	351050	313134
45	D9	1	ACTIN	38119.6	-577.473
45	D9	2	ACTIN	38420.5	-387.657
45	D9	3	ACTIN	38806.5	-112.696
45	D9	4	ACTIN	39051.5	21.1942
45	D9	5	ACTIN	39096.1	-45.2983
45	D9	6	ACTIN	39428.1	175.639
45	D9	7	ACTIN	39508.9	145.354
45	D9	8	ACTIN	39408.4	-66.2249
45	D9	9	ACTIN	39467.7	-117.967
45	D9	10	ACTIN	39847.4	150.618
45	D9	11	ACTIN	40428	620.169
45	D9	12	ACTIN	41194.2	1275.35
45	D9	13	ACTIN	42807.6	2777.59
45	D9	14	ACTIN	46572.7	6431.69
45	D9	15	ACTIN	52905.2	12653.1
45	D9	16	ACTIN	64336.2	23973
45	D9	17	ACTIN	84498.6	44024.3
45	D9	18	ACTIN	117084	76498.6
45	D9	19	ACTIN	163042	122346
45	D9	20	ACTIN	215456	174649
45	D9	21	ACTIN	263264	222345
45	D9	22	ACTIN	298228	257199
45	D9	23	ACTIN	322043	280903
45	D9	24	ACTIN	337567	296315
45	D9	25	ACTIN	348351	306988
45	D9	26	ACTIN	357603	316130
45	D9	27	ACTIN	365410	323825
45	D9	28	ACTIN	370281	328585
45	D9	29	ACTIN	373195	331388
45	D9	30	ACTIN	376132	334214
45	D9	31	ACTIN	378011	335981
45	D9	32	ACTIN	379973	337832
45	D9	33	ACTIN	380474	338223
45	D9	34	ACTIN	380421	338059
45	D9	35	ACTIN	380867	338393
45	D9	36	ACTIN	380667	338083
45	D9	37	ACTIN	380264	337568
45	D9	38	ACTIN	379868	337061
45	D9	39	ACTIN	379231	336313
45	D9	40	ACTIN	379201	336172
46	D10	1
46	D10	2
46	D10	3
46	D10	4
46	D10	5
46	D10	6
46	D10	7
46	D10	8
46	D10	9
46	D10	10
46	D10	11
46	D10	12
46	D10	13
46	D10	14
46	D10	15
46	D10	16
46	D10	17
46	D10	18
46	D10	19
46	D10	20
46	D10	21
46	D10	22
46	D10	23
46	D10	24
46	D10	25
46	D10	26
46	D10	27
46	D10	28
46	D10	29
46	D10	30
46	D10	31
46	D10	32
46	D10	33
46	D10	34
46	D10	35
46	D10	36
46	D10	37
46	D10	38
46	D10	39
46	D10	40
47	D11	1
47	D11	2
47	D11	3
47	D11	4
47	D11	5
47	D11	6
47	D11	7
47	D11	8
47	D11	9
47	D11	10
47	D11	11
47	D11	12
47	D11	13
47	D11	14
47	D11	15
47	D11	16
47	D11	17
47	D11	18
47	D11	19
47	D11	20
47	D11	21
47	D11	22
47	D11	23
47	D11	24
47	D11	25
47	D11	26
47	D11	27
47	D11	28
47	D11	29
47	D11	30
47	D11	31
47	D11	32
47	D11	33
47	D11	34
47	D11	35
47	D11	36
47	D11	37
47	D11	38
47	D11	39
47	D11	40
48	D12	1
48	D12	2
48	D12	3
48	D12	4
48	D12	5
48	D12	6
48	D12	7
48	D12	8
48	D12	9
48	D12	10
48	D12	11
48	D12	12
48	D12	13
48	D12	14
48	D12	15
48	D12	16
48	D12	17
48	D12	18
48	D12	19
48	D12	20
48	D12	21
48	D12	22
48	D12	23
48	D12	24
48	D12	25
48	D12	26
48	D12	27
48	D12	28
48	D12	29
48	D12	30
48	D12	31
48	D12	32
48	D12	33
48	D12	34
48	D12	35
48	D12	36
48	D12	37
48	D12	38
48	D12	39
48	D12	40
49	E1	1	ACTIN	37737.4	834.859
49	E1	2	ACTIN	37687.2	745.665
49	E1	3	ACTIN	36918.9	-61.5517
49	E1	4	ACTIN	36870.2	-149.222
49	E1	5	ACTIN	37370.5	312.014
49	E1	6	ACTIN	37134.1	36.6721
49	E1	7	ACTIN	37031.7	-104.74
49	E1	8	ACTIN	37142.2	-33.1722
49	E1	9	ACTIN	37231.5	17.1576
49	E1	10	ACTIN	37950.2	696.882
49	E1	11	ACTIN	39249	1956.73
49	E1	12	ACTIN	40053.5	2722.25
49	E1	13	ACTIN	42785.4	5415.15
49	E1	14	ACTIN	48026.2	10616.9
49	E1	15	ACTIN	57477.1	20028.9
49	E1	16	ACTIN	73968.7	36481.5
49	E1	17	ACTIN	100244	62718.1
49	E1	18	ACTIN	136552	98986.7
49	E1	19	ACTIN	178421	140817
49	E1	20	ACTIN	216786	179143
49	E1	21	ACTIN	245388	207706
49	E1	22	ACTIN	263910	226189
49	E1	23	ACTIN	277040	239280
49	E1	24	ACTIN	286567	248768
49	E1	25	ACTIN	293915	256077
49	E1	26	ACTIN	300024	262147
49	E1	27	ACTIN	304083	266167
49	E1	28	ACTIN	307017	269062
49	E1	29	ACTIN	309728	271734
49	E1	30	ACTIN	311356	273323
49	E1	31	ACTIN	313021	274949
49	E1	32	ACTIN	313473	275362
49	E1	33	ACTIN	313963	275813
[truncated: 1,887 more rows]

## Sheet: Result analysis
Instrument Name	2765220071247
Instrument Mode	QuantStudio™ 5 System
Serial Number	2765220071247
Signal Smoothing	true
Creation Date	2024-08-05 17:29:48 afternoon CST
Heating Module Type	96-Well 0.2-mL Block
Reference Fluorescence
Analysis at a specific stage/cycle	stage2, step2
Experiment Name	2024-08-05
Experiment File Name	D:\ZZH\2024-08-05.eds
Experiment Barcode
Experiment Annotation
Experiment Type	Quantitative-Comparison
Experiment End Time	2024-08-05 17:25:26 afternoon CST
Calibration Background Expired	No
Calibration Background Perform	09-28-2022
Calibration Pure Dye ABY Expired	No
Calibration Pure Dye ABY Perform	09-28-2022
Calibration Pure Dye CY5 Expired	No
Calibration Pure Dye CY5 Perform	09-28-2022
Calibration Pure Dye FAM Expired	No
Calibration Pure Dye FAM Perform	09-28-2022
Calibration Pure Dye JUN Expired	No
Calibration Pure Dye JUN Perform	09-28-2022
Calibration Pure Dye MUSTANG PURPLE Expired	No
Calibration Pure Dye MUSTANG PURPLE Perform	09-28-2022
Calibration Pure Dye NED Expired	No
Calibration Pure Dye NED Perform	09-28-2022
Calibration Pure Dye ROX Expired	No
Calibration Pure Dye ROX Perform	09-28-2022
Calibration Pure Dye SYBR Expired	No
Calibration Pure Dye SYBR Perform	09-28-2022
Calibration Pure Dye TAMRA Expired	No
Calibration Pure Dye TAMRA 执行	09-28-2022
Calibration Pure Dye VIC Expired	No
Calibration Pure Dye VIC Perform	09-28-2022
Calibration ROI Expired	No
Calibration ROI Perform	09-28-2022
Calibration Uniformity Expired	No
Calibration Uniformity Perform	09-28-2022
Melt Curve Stage	Stage3
Username
Reagent	SYBR_GREEN
Post-read Stage/Step
Quantification Cycle Method	Ct
Pre-read Stage/Step Number
Reaction Well	Reaction Well Position	Ignore	Sample Name	Gene Name	Task	Reporter Group	Quencher Group	Number	Mean Quantity	Number SD	RQ	RQ Minimum Value	RQ Maximum Value	Cт	Cт Average Value	Cт SD	ΔCt	ΔCt Average Value	ΔCt SD	ΔCt SE	ΔΔCt	Automatic Ct Threshold	Ct Threshold	Automatic Baseline	Baseline Start Point	Baseline End Point	Amplification Status	Annotation	Cq set	OUTLIERRG	HIGHSD	Tm1	Tm2	Tm3	Tm4	Tm4
1	A1	FALSE	SV-1	SCG2	UNKNOWN	SYBR	None				1	0.416652	2.40009	31.2107	30.3217	0.770082		14.6791	0.787961	0.454929	0	TRUE	24721.8	TRUE	3	24	Amp		0.98402	Y	N	Y	82.2554
2	A2	FALSE	SV-2	SCG2	UNKNOWN	SYBR	None				0.976491	0.533815	1.78626	31.3982	30.8733	0.524272		14.7134	0.543529	0.313806	0.0343215	TRUE	24721.8	TRUE	3	22	Amp		0.988528	N	N	Y	82.4028
3	A3	FALSE	SV-3	SCG2	UNKNOWN	SYBR	None				1.74175	1.05686	2.87047	30.0101	30.4024	0.415761		13.8786	0.449632	0.259595	-0.800536	TRUE	24721.8	TRUE	3	22	Amp		0.986826	N	Y	N	82.2293	74.8688
4	A4	FALSE	T24-1	SCG2	UNKNOWN	SYBR	None				7.78679	5.52081	10.9828	26.6207	26.7702	0.303857		11.7181	0.309516	0.178699	-2.96103	TRUE	24721.8	TRUE	3	15	Amp		0.986114	N	N	N	82.0821
5	A5	FALSE	T24-2	SCG2	UNKNOWN	SYBR	None				18.1131	15.9854	20.524	26.4052	26.52	0.100091		10.5001	0.112464	0.0649313	-4.17896	TRUE	24721.8	TRUE	3	15	Amp		0.966029	N	N	N	82.4042
6	A6	FALSE	T24-3	SCG2	UNKNOWN	SYBR	None				20.4474	14.9813	27.908	25.5191	25.8004	0.261799		10.3252	0.279952	0.16163	-4.35385	TRUE	24721.8	TRUE	3	18	Amp		0.986568	N	N	N	82.4042
7	A7	FALSE	SW1710-1	SCG2	UNKNOWN	SYBR	None				2.25912	1.92575	2.6502	29.636	29.7095	0.135827		13.5033	0.143695	0.0829623	-1.17576	TRUE	24721.8	TRUE	3	21	Amp		0.986929	N	N	N	82.3897
8	A8	FALSE	SW1710-2	SCG2	UNKNOWN	SYBR	None				2.35017	0.992445	5.56535	29.104	29.6419	0.675295		13.4463	0.775871	0.447949	-1.23277	TRUE	24721.8	TRUE	3	19	Amp		0.976934	N	Y	Y	82.3897	75.0249
9	A9	FALSE	SW1710-3	SCG2	UNKNOWN	SYBR	None				2.10601	1.58827	2.7925	30.0122	29.7616	0.228554		13.6046	0.253933	0.146608	-1.07451	TRUE	24721.8	TRUE	3	15	Amp		0.97546	N	N	N	82.4085
13	B1	FALSE	SV-1	SCG2	UNKNOWN	SYBR	None				1	0.416652	2.40009	29.8954	30.3217	0.770082		14.6791	0.787961	0.454929	0	TRUE	24721.8	TRUE	3	21	Amp		0.984807	N	N	Y	82.2554
14	B2	FALSE	SV-2	SCG2	UNKNOWN	SYBR	None				0.976491	0.533815	1.78626	30.3496	30.8733	0.524272		14.7134	0.543529	0.313806	0.0343215	TRUE	24721.8	TRUE	3	23	Amp		0.98433	N	N	Y	82.4028
15	B3	FALSE	SV-3	SCG2	UNKNOWN	SYBR	None				1.74175	1.05686	2.87047	30.3589	30.4024	0.415761		13.8786	0.449632	0.259595	-0.800536	TRUE	24721.8	TRUE	3	23	Amp		0.989169	N	N	N	82.2293
16	B4	FALSE	T24-1	SCG2	UNKNOWN	SYBR	None				7.78679	5.52081	10.9828	26.5699	26.7702	0.303857		11.7181	0.309516	0.178699	-2.96103	TRUE	24721.8	TRUE	3	16	Amp		0.980563	N	N	N	82.0821
17	B5	FALSE	T24-2	SCG2	UNKNOWN	SYBR	None				18.1131	15.9854	20.524	26.5657	26.52	0.100091		10.5001	0.112464	0.0649313	-4.17896	TRUE	24721.8	TRUE	3	20	Amp		0.988569	N	N	N	82.2568
18	B6	FALSE	T24-3	SCG2	UNKNOWN	SYBR	None				20.4474	14.9813	27.908	25.8453	25.8004	0.261799		10.3252	0.279952	0.16163	-4.35385	TRUE	24721.8	TRUE	3	19	Amp		0.988805	N	N	N	82.2568
19	B7	FALSE	SW1710-1	SCG2	UNKNOWN	SYBR	None				2.25912	1.92575	2.6502	29.8662	29.7095	0.135827		13.5033	0.143695	0.0829623	-1.17576	TRUE	24721.8	TRUE	3	23	Amp		0.991147	N	N	N	82.3897
20	B8	FALSE	SW1710-2	SCG2	UNKNOWN	SYBR	None				2.35017	0.992445	5.56535	30.3997	29.6419	0.675295		13.4463	0.775871	0.447949	-1.23277	TRUE	24721.8	TRUE	3	21	Amp		0.989009	N	N	Y	82.2424
21	B9	FALSE	SW1710-3	SCG2	UNKNOWN	SYBR	None				2.10601	1.58827	2.7925	29.7081	29.7616	0.228554		13.6046	0.253933	0.146608	-1.07451	TRUE	24721.8	TRUE	3	22	Amp		0.991669	N	N	N	82.4085
25	C1	FALSE	SV-1	SCG2	UNKNOWN	SYBR	None				1	0.416652	2.40009	29.8591	30.3217	0.770082		14.6791	0.787961	0.454929	0	TRUE	24721.8	TRUE	3	22	Amp		0.988259	N	Y	Y	82.108	74.8862
26	C2	FALSE	SV-2	SCG2	UNKNOWN	SYBR	None				0.976491	0.533815	1.78626	30.8719	30.8733	0.524272		14.7134	0.543529	0.313806	0.0343215	TRUE	24721.8	TRUE	3	23	Amp		0.991403	N	N	Y	82.4028
27	C3	FALSE	SV-3	SCG2	UNKNOWN	SYBR	None				1.74175	1.05686	2.87047	30.8382	30.4024	0.415761		13.8786	0.449632	0.259595	-0.800536	TRUE	24721.8	TRUE	3	22	Amp		0.989723	N	N	N	82.2293
28	C4	FALSE	T24-1	SCG2	UNKNOWN	SYBR	None				7.78679	5.52081	10.9828	27.1198	26.7702	0.303857		11.7181	0.309516	0.178699	-2.96103	TRUE	24721.8	TRUE	3	17	Amp		0.980412	N	N	N	82.2293
29	C5	FALSE	T24-2	SCG2	UNKNOWN	SYBR	None				18.1131	15.9854	20.524	26.5891	26.52	0.100091		10.5001	0.112464	0.0649313	-4.17896	TRUE	24721.8	TRUE	3	17	Amp		0.988845	N	N	N	82.2568
30	C6	FALSE	T24-3	SCG2	UNKNOWN	SYBR	None				20.4474	14.9813	27.908	26.0369	25.8004	0.261799		10.3252	0.279952	0.16163	-4.35385	TRUE	24721.8	TRUE	3	18	Amp		0.983842	N	N	N	82.2568
31	C7	FALSE	SW1710-1	SCG2	UNKNOWN	SYBR	None				2.25912	1.92575	2.6502	29.6262	29.7095	0.135827		13.5033	0.143695	0.0829623	-1.17576	TRUE	24721.8	TRUE	3	23	Amp		0.987523	N	Y	N	82.2424	74.8776
32	C8	FALSE	SW1710-2	SCG2	UNKNOWN	SYBR	None				2.35017	0.992445	5.56535	29.4219	29.6419	0.675295		13.4463	0.775871	0.447949	-1.23277	TRUE	24721.8	TRUE	3	21	Amp		0.979773	N	N	Y	82.0951
33	C9	FALSE	SW1710-3	SCG2	UNKNOWN	SYBR	None				2.10601	1.58827	2.7925	29.5646	29.7616	0.228554		13.6046	0.253933	0.146608	-1.07451	TRUE	24721.8	TRUE	3	20	Amp		0.990402	N	N	N	82.2611
37	D1	FALSE	SV-1	ACTIN	UNKNOWN	SYBR	None							15.7274	15.6426	0.166902						TRUE	26663.8	TRUE	3	9	Inconclusive		0.983721	N	N	N	85.6452
38	D2	FALSE	SV-2	ACTIN	UNKNOWN	SYBR	None							16.2172	16.1598	0.143394						TRUE	26663.8	TRUE	3	9	Inconclusive		0.982272	N	N	N	85.7926
39	D3	FALSE	SV-3	ACTIN	UNKNOWN	SYBR	None							16.4751	16.5238	0.171207						TRUE	26663.8	TRUE	3	9	Inconclusive		0.988341	N	N	N	85.9095
40	D4	FALSE	T24-1	ACTIN	UNKNOWN	SYBR	None							15.0108	15.0521	0.0589124						TRUE	26663.8	TRUE	3	8	Inconclusive		0.970237	N	N	N	86.0567
41	D5	FALSE	T24-2	ACTIN	UNKNOWN	SYBR	None							15.9622	16.0198	0.0512833						TRUE	26663.8	TRUE	3	8	Inconclusive		0.991763	N	N	N	85.7941
42	D6	FALSE	T24-3	ACTIN	UNKNOWN	SYBR	None							15.5404	15.4752	0.0991685						TRUE	26663.8	TRUE	3	8	Inconclusive		0.983273	N	N	N	85.7941
43	D7	FALSE	SW1710-1	ACTIN	UNKNOWN	SYBR	None							16.1981	16.2061	0.0468964						TRUE	26663.8	TRUE	3	10	Inconclusive		0.981534	N	N	N	85.6302
44	D8	FALSE	SW1710-2	ACTIN	UNKNOWN	SYBR	None							16.5734	16.1956	0.382037						TRUE	26663.8	TRUE	3	9	Inconclusive		0.976246	N	N	N	85.6302
45	D9	FALSE	SW1710-3	ACTIN	UNKNOWN	SYBR	None							16.1583	16.157	0.110657						TRUE	26663.8	TRUE	3	9	Inconclusive		0.982928	N	N	N	85.7991
49	E1	FALSE	SV-1	ACTIN	UNKNOWN	SYBR	None							15.4504	15.6426	0.166902						TRUE	26663.8	TRUE	3	8	Inconclusive		0.985154	N	N	N	85.4978
50	E2	FALSE	SV-2	ACTIN	UNKNOWN	SYBR	None							15.9966	16.1598	0.143394						TRUE	26663.8	TRUE	3	7	Inconclusive		0.986083	N	N	N	85.6452
51	E3	FALSE	SV-3	ACTIN	UNKNOWN	SYBR	None							16.3823	16.5238	0.171207						TRUE	26663.8	TRUE	3	8	Inconclusive		0.987065	N	N	N	86.0567
52	E4	FALSE	T24-1	ACTIN	UNKNOWN	SYBR	None							15.0259	15.0521	0.0589124						TRUE	26663.8	TRUE	3	8	Inconclusive		0.977019	N	N	N	86.2039
53	E5	FALSE	T24-2	ACTIN	UNKNOWN	SYBR	None							16.0604	16.0198	0.0512833						TRUE	26663.8	TRUE	3	9	Inconclusive		0.983419	N	N	N	85.7941
54	E6	FALSE	T24-3	ACTIN	UNKNOWN	SYBR	None							15.3611	15.4752	0.0991685						TRUE	26663.8	TRUE	3	9	Inconclusive		0.98001	N	N	N	85.7941
55	E7	FALSE	SW1710-1	ACTIN	UNKNOWN	SYBR	None							16.1637	16.2061	0.0468964						TRUE	26663.8	TRUE	3	8	Inconclusive		0.97048	N	N	N	85.6302
56	E8	FALSE	SW1710-2	ACTIN	UNKNOWN	SYBR	None							15.8095	16.1956	0.382037						TRUE	26663.8	TRUE	3	8	Inconclusive		0.976811	N	N	N	85.6302
57	E9	FALSE	SW1710-3	ACTIN	UNKNOWN	SYBR	None							16.0458	16.157	0.110657						TRUE	26663.8	TRUE	3	10	Inconclusive		0.969111	N	N	N	85.7991
61	F1	FALSE	SV-1	ACTIN	UNKNOWN	SYBR	None							15.7501	15.6426	0.166902						TRUE	26663.8	TRUE	3	10	Inconclusive		0.98567	N	N	N	85.4978
62	F2	FALSE	SV-2	ACTIN	UNKNOWN	SYBR	None							16.2657	16.1598	0.143394						TRUE	26663.8	TRUE	3	10	Inconclusive		0.985434	N	N	N	85.4978
63	F3	FALSE	SV-3	ACTIN	UNKNOWN	SYBR	None							16.7141	16.5238	0.171207						TRUE	26663.8	TRUE	3	10	Inconclusive		0.990707	N	N	N	86.3512
64	F4	FALSE	T24-1	ACTIN	UNKNOWN	SYBR	None							15.1196	15.0521	0.0589124						TRUE	26663.8	TRUE	3	8	Inconclusive		0.982255	N	N	N	86.4984
65	F5	FALSE	T24-2	ACTIN	UNKNOWN	SYBR	None							16.0369	16.0198	0.0512833						TRUE	26663.8	TRUE	3	8	Inconclusive		0.97954	N	N	N	85.9415
66	F6	FALSE	T24-3	ACTIN	UNKNOWN	SYBR	None							15.5241	15.4752	0.0991685						TRUE	26663.8	TRUE	3	10	Inconclusive		0.984497	N	N	N	85.9415
67	F7	FALSE	SW1710-1	ACTIN	UNKNOWN	SYBR	None							16.2565	16.2061	0.0468964						TRUE	26663.8	TRUE	3	10	Inconclusive		0.979037	N	N	N	85.4829
68	F8	FALSE	SW1710-2	ACTIN	UNKNOWN	SYBR	None							16.2038	16.1956	0.382037						TRUE	26663.8	TRUE	3	10	Inconclusive		0.973325	N	N	N	85.6302
69	F9	FALSE	SW1710-3	ACTIN	UNKNOWN	SYBR	None							16.2671	16.157	0.110657						TRUE	26663.8	TRUE	3	9	Inconclusive		0.983872	N	N	N	85.7991
RQ minimum/maximum confidence	95.0
Reference gene	ACTIN
Analysis type	Single
Control sample	SV-1

## Sheet: Raw dissolution curve data
Instrument Name	2765220071247
Instrument Mode	QuantStudio™ 5 System
Serial Number	2765220071247
Signal Smoothing	true
Creation Date	2024-08-05 17:29:48 afternoon CST
Heating Module Type	96-Well 0.2-mL Block
Reference Fluorescence
Analysis at a specific stage/cycle	stage2, step2
Experiment Name	2024-08-05
Experiment File Name	D:\ZZH\2024-08-05.eds
Experiment Barcode
Experiment Annotation
Experiment Type	Quantitative-Comparison
Experiment End Time	2024-08-05 17:25:26 afternoon CST
Calibration Background Expired	No
Calibration Background Perform	09-28-2022
Calibration Pure Dye ABY Expired	No
Calibration Pure Dye ABY Perform	09-28-2022
Calibration Pure Dye CY5 Expired	No
Calibration Pure Dye CY5 Perform	09-28-2022
Calibration Pure Dye FAM Expired	No
Calibration Pure Dye FAM Perform	09-28-2022
Calibration Pure Dye JUN Expired	No
Calibration Pure Dye JUN Perform	09-28-2022
Calibration Pure Dye MUSTANG PURPLE Expired	No
Calibration Pure Dye MUSTANG PURPLE Perform	09-28-2022
Calibration Pure Dye NED Expired	No
Calibration Pure Dye NED Perform	09-28-2022
Calibration Pure Dye ROX Expired	No
Calibration Pure Dye ROX Perform	09-28-2022
Calibration Pure Dye SYBR Expired	No
Calibration Pure Dye SYBR Perform	09-28-2022
Calibration Pure Dye TAMRA Expired	No
Calibration Pure Dye TAMRA 执行	09-28-2022
Calibration Pure Dye VIC Expired	No
Calibration Pure Dye VIC Perform	09-28-2022
Calibration ROI Expired	No
Calibration ROI Perform	09-28-2022
Calibration Uniformity Expired	No
Calibration Uniformity Perform	09-28-2022
Melt Curve Stage	Stage3
Username
Reagent	SYBR_GREEN
Post-read Stage/Step
Quantification Cycle Method	Ct
Pre-read Stage/Step Number
Reaction Well	Reaction Well Position	Reading	Temperature	Fluorescence	Derivative	Gene Name
1	A1	1	60.0006	299482	8137.83	SCG2
1	A1	2	60.2954	297608	8169.39	SCG2
1	A1	3	60.5901	294425	8184.55	SCG2
1	A1	4	60.8849	292314	8181.6	SCG2
1	A1	5	61.1797	290627	8170.63	SCG2
1	A1	6	61.4744	286886	8166.56	SCG2
1	A1	7	61.7692	285746	8178.4	SCG2
1	A1	8	62.064	282624	8202.71	SCG2
1	A1	9	62.3587	280999	8226.46	SCG2
1	A1	10	62.6535	277328	8237.53	SCG2
1	A1	11	62.9482	274153	8233.82	SCG2
1	A1	12	63.243	272341	8223.88	SCG2
1	A1	13	63.5378	269097	8218.34	SCG2
1	A1	14	63.8325	267648	8220.11	SCG2
1	A1	15	64.1273	264734	8222.07	SCG2
1	A1	16	64.4221	261656	8213.97	SCG2
1	A1	17	64.7168	258526	8191.65	SCG2
1	A1	18	65.0116	255939	8159.89	SCG2
1	A1	19	65.3064	253834	8126.81	SCG2
1	A1	20	65.6011	252069	8096.31	SCG2
1	A1	21	65.8959	248377	8065.99	SCG2
1	A1	22	66.1907	245587	8032.35	SCG2
1	A1	23	66.4854	243275	7997.13	SCG2
1	A1	24	66.7802	240635	7967.43	SCG2
1	A1	25	67.075	238651	7949.15	SCG2
1	A1	26	67.3697	236216	7938.92	SCG2
1	A1	27	67.6645	233003	7922.31	SCG2
1	A1	28	67.9593	231702	7880.6	SCG2
1	A1	29	68.254	227831	7802.84	SCG2
1	A1	30	68.5488	225053	7694.6	SCG2
1	A1	31	68.8436	223135	7577.64	SCG2
1	A1	32	69.1383	221330	7479.71	SCG2
1	A1	33	69.4331	218714	7421.51	SCG2
1	A1	34	69.7279	217486	7408.22	SCG2
1	A1	35	70.0226	213551	7429.66	SCG2
1	A1	36	70.3174	212294	7466.9	SCG2
1	A1	37	70.6122	209405	7499.78	SCG2
1	A1	38	70.9069	207819	7512.85	SCG2
1	A1	39	71.2017	205079	7499.29	SCG2
1	A1	40	71.4964	201471	7462.21	SCG2
1	A1	41	71.7912	200452	7412.15	SCG2
1	A1	42	72.086	197573	7360.1	SCG2
1	A1	43	72.3807	196663	7311.27	SCG2
1	A1	44	72.6755	193311	7263.75	SCG2
1	A1	45	72.9703	190418	7211.95	SCG2
1	A1	46	73.265	188376	7151.91	SCG2
1	A1	47	73.5598	186600	7098.01	SCG2
1	A1	48	73.8546	185374	7056.56	SCG2
1	A1	49	74.1493	181374	7025.43	SCG2
1	A1	50	74.4441	180252	6993.66	SCG2
1	A1	51	74.7389	177767	6948.83	SCG2
1	A1	52	75.0336	174881	6885.46	SCG2
1	A1	53	75.3284	173154	6808.51	SCG2
1	A1	54	75.6232	171973	6729.97	SCG2
1	A1	55	75.9179	168725	6662.15	SCG2
1	A1	56	76.2127	167238	6612.52	SCG2
1	A1	57	76.5075	165281	6582.42	SCG2
1	A1	58	76.8022	162913	6568.02	SCG2
1	A1	59	77.097	161286	6562.29	SCG2
1	A1	60	77.3918	158367	6556.07	SCG2
1	A1	61	77.6865	157425	6540.33	SCG2
1	A1	62	77.9813	154610	6510.54	SCG2
1	A1	63	78.276	152552	6473.81	SCG2
1	A1	64	78.5708	150268	6456.01	SCG2
1	A1	65	78.8656	148497	6507.36	SCG2
1	A1	66	79.1603	147536	6707.95	SCG2
1	A1	67	79.4551	145228	7179.85	SCG2
1	A1	68	79.7499	142963	7969.31	SCG2
1	A1	69	80.0446	140100	9361.27	SCG2
1	A1	70	80.3394	138384	11644.2	SCG2
1	A1	71	80.6342	135895	15082.5	SCG2
1	A1	72	80.9289	132907	19779.8	SCG2
1	A1	73	81.2237	127759	25502.8	SCG2
1	A1	74	81.5185	118462	31565.4	SCG2
1	A1	75	81.8132	100490	36882.5	SCG2
1	A1	76	82.108	69502.1	40242	SCG2
1	A1	77	82.4028	39589.8	40721.3	SCG2
1	A1	78	82.6975	22348.6	38058.2	SCG2
1	A1	79	82.9923	18294.2	32777.1	SCG2
1	A1	80	83.2871	16506.7	25994.1	SCG2
1	A1	81	83.5818	17444.2	19002.2	SCG2
1	A1	82	83.8766	16600.8	12853.8	SCG2
1	A1	83	84.1714	15988.6	8122.21	SCG2
1	A1	84	84.4661	17263.1	4461.2	SCG2
1	A1	85	84.7609	17389.9	2135.94	SCG2
1	A1	86	85.0557	16613.3	874.301	SCG2
1	A1	87	85.3504	16257.2	259.845	SCG2
1	A1	88	85.6452	16063	-11.7568	SCG2
1	A1	89	85.9399	16579.8	-119.24	SCG2
1	A1	90	86.2347	16786.8	-146.077	SCG2
1	A1	91	86.5295	16257	-124.972	SCG2
1	A1	92	86.8242	16826.1	-74.8018	SCG2
1	A1	93	87.119	15694.3	-18.3994	SCG2
1	A1	94	87.4138	15397	18.9971	SCG2
1	A1	95	87.7085	15804.9	21.0645	SCG2
1	A1	96	88.0033	15492.5	-10.9785	SCG2
1	A1	97	88.2981	15736.7	-60.0317	SCG2
1	A1	98	88.5928	15750.1	-103.792	SCG2
1	A1	99	88.8876	15598	-127.145	SCG2
1	A1	100	89.1824	15155.8	-129.014	SCG2
1	A1	101	89.4771	15733.7	-121.247	SCG2
1	A1	102	89.7719	15071.5	-121.537	SCG2
1	A1	103	90.0667	14969.9	-144.377	SCG2
1	A1	104	90.3614	14494	-193.753	SCG2
1	A1	105	90.6562	15756.1	-260.355	SCG2
1	A1	106	90.951	14828.2	-324.751	SCG2
1	A1	107	91.2457	15480.9	-365.289	SCG2
1	A1	108	91.5405	15146.1	-367.137	SCG2
1	A1	109	91.8353	15371.9	-328.407	SCG2
1	A1	110	92.13	15391.2	-261.091	SCG2
1	A1	111	92.4248	14860.6	-186.746	SCG2
1	A1	112	92.7196	14497.7	-128.54	SCG2
1	A1	113	93.0143	14620.8	-102.542	SCG2
1	A1	114	93.3091	15026.1	-111.921	SCG2
1	A1	115	93.6039	14064.5	-146.904	SCG2
1	A1	116	93.8986	15114.5	-190.211	SCG2
1	A1	117	94.1934	14340.6	-224.853	SCG2
1	A1	118	94.4881	14371.5	-240.227	SCG2
1	A1	119	94.7829	15107.9	-234.341	SCG2
2	A2	1	60.0006	273777	7751.92	SCG2
2	A2	2	60.2954	270914	7753.6	SCG2
2	A2	3	60.5901	269526	7748.81	SCG2
2	A2	4	60.8849	266818	7738.54	SCG2
2	A2	5	61.1797	265435	7729.43	SCG2
2	A2	6	61.4744	261630	7728.43	SCG2
2	A2	7	61.7692	260997	7736.38	SCG2
2	A2	8	62.064	258904	7746.4	SCG2
2	A2	9	62.3587	254827	7748.12	SCG2
2	A2	10	62.6535	253115	7733.64	SCG2
2	A2	11	62.9482	250122	7701.26	SCG2
2	A2	12	63.243	248960	7654.64	SCG2
2	A2	13	63.5378	245460	7601.02	SCG2
2	A2	14	63.8325	243676	7549.69	SCG2
2	A2	15	64.1273	240247	7511.18	SCG2
2	A2	16	64.4221	239247	7494.38	SCG2
2	A2	17	64.7168	236303	7502.48	SCG2
2	A2	18	65.0116	234529	7530	SCG2
2	A2	19	65.3064	232037	7564.53	SCG2
2	A2	20	65.6011	229308	7592.58	SCG2
2	A2	21	65.8959	226686	7606.14	SCG2
2	A2	22	66.1907	224635	7605.11	SCG2
2	A2	23	66.4854	221668	7594.4	SCG2
2	A2	24	66.7802	219940	7578.32	SCG2
2	A2	25	67.075	217897	7556.96	SCG2
2	A2	26	67.3697	215072	7527.31	SCG2
2	A2	27	67.6645	212093	7487.51	SCG2
2	A2	28	67.9593	210356	7440.21	SCG2
2	A2	29	68.254	208302	7391.92	SCG2
2	A2	30	68.5488	205715	7349.44	SCG2
2	A2	31	68.8436	203690	7316.29	SCG2
2	A2	32	69.1383	201370	7291.95	SCG2
2	A2	33	69.4331	199128	7273.38	SCG2
2	A2	34	69.7279	196804	7256.71	SCG2
2	A2	35	70.0226	194463	7237.91	SCG2
2	A2	36	70.3174	193005	7211.39	SCG2
2	A2	37	70.6122	190393	7169.39	SCG2
2	A2	38	70.9069	187739	7122.2	SCG2
2	A2	39	71.2017	185526	7081.61	SCG2
2	A2	40	71.4964	184027	7062.82	SCG2
2	A2	41	71.7912	182391	7077.44	SCG2
2	A2	42	72.086	179578	7128.11	SCG2
2	A2	43	72.3807	177560	7209.02	SCG2
2	A2	44	72.6755	174892	7287.99	SCG2
2	A2	45	72.9703	173067	7372.08	SCG2
2	A2	46	73.265	171179	7456.65	SCG2
2	A2	47	73.5598	168047	7534.38	SCG2
2	A2	48	73.8546	165683	7598.11	SCG2
2	A2	49	74.1493	163785	7641.79	SCG2
2	A2	50	74.4441	160255	7660.95	SCG2
2	A2	51	74.7389	158967	7651.16	SCG2
2	A2	52	75.0336	155856	7606.34	SCG2
2	A2	53	75.3284	154014	7519.9	SCG2
2	A2	54	75.6232	151198	7389.91	SCG2
2	A2	55	75.9179	148286	7224.93	SCG2
2	A2	56	76.2127	146289	6988.73	SCG2
2	A2	57	76.5075	145695	6764.08	SCG2
2	A2	58	76.8022	143136	6576.83	SCG2
2	A2	59	77.097	141168	6431.08	SCG2
2	A2	60	77.3918	139120	6312.08	SCG2
2	A2	61	77.6865	137070	6198.5	SCG2
2	A2	62	77.9813	135246	6078	SCG2
2	A2	63	78.276	132719	5957.03	SCG2
2	A2	64	78.5708	132308	5862.35	SCG2
2	A2	65	78.8656	130094	5839.2	SCG2
2	A2	66	79.1603	128427	5953.89	SCG2
2	A2	67	79.4551	126292	6305.88	SCG2
2	A2	68	79.7499	125704	7046.56	SCG2
2	A2	69	80.0446	122875	8106.02	SCG2
2	A2	70	80.3394	121424	9785.3	SCG2
2	A2	71	80.6342	118805	12324.6	SCG2
2	A2	72	80.9289	115887	15821.7	SCG2
2	A2	73	81.2237	111829	20149.9	SCG2
2	A2	74	81.5185	103784	24859.4	SCG2
2	A2	75	81.8132	90603.9	29180.5	SCG2
2	A2	76	82.108	67471.3	32185.4	SCG2
2	A2	77	82.4028	38310.9	33084	SCG2
2	A2	78	82.6975	19391.1	31531.6	SCG2
2	A2	79	82.9923	14209.7	27789.5	SCG2
2	A2	80	83.2871	11795.5	22640.5	SCG2
2	A2	81	83.5818	13565.9	17098.6	SCG2
2	A2	82	83.8766	12939.7	12063.9	SCG2
2	A2	83	84.1714	12634.8	8086.2	SCG2
2	A2	84	84.4661	12660.7	4699.65	SCG2
2	A2	85	84.7609	12888.9	2436.95	SCG2
2	A2	86	85.0557	12434.7	1203.36	SCG2
2	A2	87	85.3504	13187.4	616.755	SCG2
2	A2	88	85.6452	12149	379.946	SCG2
2	A2	89	85.9399	11943.3	300.736	SCG2
2	A2	90	86.2347	12102.7	273.912	SCG2
2	A2	91	86.5295	11662.1	252.573	SCG2
2	A2	92	86.8242	12187	222.241	SCG2
2	A2	93	87.119	11556.3	182.318	SCG2
2	A2	94	87.4138	11371.1	135.862	SCG2
2	A2	95	87.7085	11850.5	86.3574	SCG2
2	A2	96	88.0033	11058.2	37.8579	SCG2
2	A2	97	88.2981	12018	-5.37793	SCG2
2	A2	98	88.5928	11651.6	-41.0176	SCG2
2	A2	99	88.8876	11286.8	-70.2964	SCG2
2	A2	100	89.1824	11349.3	-96.4077	SCG2
2	A2	101	89.4771	11331.2	-120.17	SCG2
2	A2	102	89.7719	11827.2	-136.937	SCG2
2	A2	103	90.0667	11250.3	-138.612	SCG2
2	A2	104	90.3614	12135.3	-120.112	SCG2
2	A2	105	90.6562	11511	-85.1294	SCG2
2	A2	106	90.951	10912.3	-45.9058	SCG2
2	A2	107	91.2457	11277.7	-16.688	SCG2
2	A2	108	91.5405	11428.4	-6.13477	SCG2
2	A2	109	91.8353	10957	-14.9873	SCG2
2	A2	110	92.13	11996	-40.2734	SCG2
2	A2	111	92.4248	10713.4	-80.8706	SCG2
2	A2	112	92.7196	10652.7	-138.049	SCG2
2	A2	113	93.0143	11482.6	-210.153	SCG2
2	A2	114	93.3091	11418.2	-287.274	SCG2
2	A2	115	93.6039	11639.3	-352.687	SCG2
2	A2	116	93.8986	11886.8	-391.514	SCG2
2	A2	117	94.1934	11577.1	-399.989	SCG2
2	A2	118	94.4881	11256.1	-387.882	SCG2
2	A2	119	94.7829	11682.7	-372.356	SCG2
3	A3	1	60.0007	283512	7924.74	SCG2
3	A3	2	60.2951	281204	7965.35	SCG2
3	A3	3	60.5895	279480	7999.41	SCG2
3	A3	4	60.884	276437	8039.08	SCG2
3	A3	5	61.1784	275297	8087.02	SCG2
3	A3	6	61.4728	272902	8143.35	SCG2
3	A3	7	61.7672	270370	8202.75	SCG2
3	A3	8	62.0616	267626	8255	SCG2
3	A3	9	62.356	265069	8289.58	SCG2
3	A3	10	62.6505	262980	8300.35	SCG2
3	A3	11	62.9449	259246	8288.49	SCG2
3	A3	12	63.2393	257423	8262.04	SCG2
3	A3	13	63.5337	254568	8232.94	SCG2
3	A3	14	63.8281	252039	8212.73	SCG2
3	A3	15	64.1226	249513	8208.77	SCG2
3	A3	16	64.417	247176	8221.42	SCG2
3	A3	17	64.7114	244376	8243.37	SCG2
3	A3	18	65.0058	242065	8261.32	SCG2
3	A3	19	65.3002	239560	8260.29	SCG2
3	A3	20	65.5947	236436	8229.23	SCG2
3	A3	21	65.8891	233330	8165.6	SCG2
3	A3	22	66.1835	231649	8077.12	SCG2
3	A3	23	66.4779	228722	7979.62	SCG2
3	A3	24	66.7723	225803	7860.9	SCG2
3	A3	25	67.0667	224057	7769.5	SCG2
3	A3	26	67.3612	222498	7722.93	SCG2
3	A3	27	67.6556	219008	7716.43	SCG2
3	A3	28	67.95	217614	7735.62	SCG2
3	A3	29	68.2444	214393	7764.71	SCG2
3	A3	30	68.5388	212568	7794	SCG2
3	A3	31	68.8333	209634	7822.55	SCG2
3	A3	32	69.1277	207465	7855.59	SCG2
3	A3	33	69.4221	205217	7898.02	SCG2
3	A3	34	69.7165	202805	7949.1	SCG2
3	A3	35	70.0109	200380	7989	SCG2
3	A3	36	70.3054	197952	8019.21	SCG2
3	A3	37	70.5998	195479	8040.23	SCG2
3	A3	38	70.8942	192254	8056.36	SCG2
3	A3	39	71.1886	190567	8079.8	SCG2
3	A3	40	71.483	188119	8127.63	SCG2
3	A3	41	71.7774	185970	8218.15	SCG2
3	A3	42	72.0719	182834	8368.67	SCG2
3	A3	43	72.3663	180490	8594.37	SCG2
3	A3	44	72.6607	178427	8906.96	SCG2
3	A3	45	72.9551	175242	9310.94	SCG2
3	A3	46	73.2495	172462	9798.42	SCG2
3	A3	47	73.544	169171	10344.2	SCG2
3	A3	48	73.8384	165909	10903.9	SCG2
3	A3	49	74.1328	161356	11418.2	SCG2
3	A3	50	74.4272	157346	11821.3	SCG2
3	A3	51	74.7216	151888	12054.9	SCG2
3	A3	52	75.016	147462	12081.1	SCG2
3	A3	53	75.3105	142573	11891.3	SCG2
3	A3	54	75.6049	138682	11508	SCG2
3	A3	55	75.8993	133797	10978.3	SCG2
3	A3	56	76.1937	131474	10362	SCG2
3	A3	57	76.4881	128028	9717.65	SCG2
3	A3	58	76.7826	125149	9092.28	SCG2
3	A3	59	77.077	123183	8516.72	SCG2
3	A3	60	77.3714	120183	8007.48	SCG2
3	A3	61	77.6658	118001	7400.23	SCG2
3	A3	62	77.9602	116749	6886.99	SCG2
3	A3	63	78.2546	114318	6497.68	SCG2
3	A3	64	78.5491	112621	6247.03	SCG2
3	A3	65	78.8435	110998	6158.94	SCG2
3	A3	66	79.1379	109500	6275.43	SCG2
3	A3	67	79.4323	108170	6672.63	SCG2
3	A3	68	79.7267	105143	7480.63	SCG2
3	A3	69	80.0212	103493	8606.39	SCG2
3	A3	70	80.3156	101876	10163.3	SCG2
3	A3	71	80.61	99743.2	12431.8	SCG2
3	A3	72	80.9044	96509.8	15425.5	SCG2
3	A3	73	81.1988	91477.2	18938.7	SCG2
3	A3	74	81.4933	85785.1	22493.8	SCG2
3	A3	75	81.7877	73552.7	25398.6	SCG2
3	A3	76	82.0821	52064.4	26934.8	SCG2
3	A3	77	82.3765	26294.2	26618.4	SCG2
3	A3	78	82.6709	13285	24409.8	SCG2
3	A3	79	82.9653	11651.6	20751.3	SCG2
3	A3	80	83.2598	10732.4	16401.9	SCG2
3	A3	81	83.5542	10996.8	12157.2	SCG2
3	A3	82	83.8486	11316.4	8598.69	SCG2
3	A3	83	84.143	10987.2	5104.8	SCG2
3	A3	84	84.4374	10214.7	2642.34	SCG2
3	A3	85	84.7319	10569	1213.81	SCG2
3	A3	86	85.0263	10545.4	483.918	SCG2
3	A3	87	85.3207	10761.9	169.684	SCG2
3	A3	88	85.6151	11085.3	71.1016	SCG2
3	A3	89	85.9095	10020.2	59.5747	SCG2
3	A3	90	86.2039	9851.71	59.2158	SCG2
3	A3	91	86.4984	9263.05	35.3394	SCG2
3	A3	92	86.7928	9671.09	-14.0967	SCG2
3	A3	93	87.0872	10478.7	-71.9766	SCG2
3	A3	94	87.3816	9837.5	-119.752	SCG2
3	A3	95	87.676	9692.72	-150.525	SCG2
3	A3	96	87.9705	9198.49	-169.991	SCG2
3	A3	97	88.2649	9801.96	-187.107	SCG2
3	A3	98	88.5593	9123.73	-204.065	SCG2
3	A3	99	88.8537	9822.76	-214.055	SCG2
3	A3	100	89.1481	9684.16	-207.45	SCG2
3	A3	101	89.4426	9303.14	-180.216	SCG2
3	A3	102	89.737	9605.41	-137.751	SCG2
3	A3	103	90.0314	9206.58	-92.1719	SCG2
3	A3	104	90.3258	8804.32	-56.1348	SCG2
3	A3	105	90.6202	9176.14	-37.9189	SCG2
3	A3	106	90.9146	8989.83	-40.0361	SCG2
3	A3	107	91.2091	8858.63	-60.2212	SCG2
3	A3	108	91.5035	8494.04	-92.5225	SCG2
3	A3	109	91.7979	8278.68	-128.337	SCG2
3	A3	110	92.0923	9106.28	-159.214	SCG2
3	A3	111	92.3867	9002.71	-181.775	SCG2
3	A3	112	92.6812	8328.14	-201.244	SCG2
3	A3	113	92.9756	8169.74	-229.091	SCG2
3	A3	114	93.27	8068.72	-274.94	SCG2
3	A3	115	93.5644	8954.41	-338.854	SCG2
3	A3	116	93.8588	8277.08	-410.589	SCG2
3	A3	117	94.1532	8764.2	-476.428	SCG2
3	A3	118	94.4477	8968.49	-527.745	SCG2
3	A3	119	94.7421	8432.48	-564.901	SCG2
4	A4	1	60.0007	306122	7771.6	SCG2
4	A4	2	60.2951	303514	7775.42	SCG2
4	A4	3	60.5895	301830	7785.94	SCG2
4	A4	4	60.884	299789	7803.55	SCG2
4	A4	5	61.1784	297656	7830.47	SCG2
4	A4	6	61.4728	295390	7866.76	SCG2
4	A4	7	61.7672	293351	7906.81	SCG2
4	A4	8	62.0616	290523	7939.44	SCG2
4	A4	9	62.356	288013	7951.87	SCG2
4	A4	10	62.6505	285951	7936.21	SCG2
4	A4	11	62.9449	282996	7894.44	SCG2
4	A4	12	63.2393	280439	7838.32	SCG2
4	A4	13	63.5337	277411	7783.39	SCG2
4	A4	14	63.8281	276005	7740.95	SCG2
4	A4	15	64.1226	273968	7712.82	SCG2
4	A4	16	64.417	271216	7693.14	SCG2
4	A4	17	64.7114	267865	7674.55	SCG2
4	A4	18	65.0058	265887	7653.1	SCG2
4	A4	19	65.3002	264002	7628.61	SCG2
4	A4	20	65.5947	261669	7602.4	SCG2
4	A4	21	65.8891	258837	7576.23	SCG2
4	A4	22	66.1835	256544	7553.21	SCG2
4	A4	23	66.4779	253534	7537.37	SCG2
4	A4	24	66.7723	252379	7531.1	SCG2
4	A4	25	67.0667	250270	7531.34	SCG2
4	A4	26	67.3612	247130	7529.48	SCG2
4	A4	27	67.6556	244622	7515.18	SCG2
4	A4	28	67.95	243012	7481.8	SCG2
4	A4	29	68.2444	240053	7429.56	SCG2
4	A4	30	68.5388	237928	7364.7	SCG2
4	A4	31	68.8333	235932	7296.08	SCG2
4	A4	32	69.1277	233161	7231.37	SCG2
4	A4	33	69.4221	231678	7171.18	SCG2
4	A4	34	69.7165	229314	7110.61	SCG2
4	A4	35	70.0109	226760	7058.27	SCG2
4	A4	36	70.3054	225249	7013.3	SCG2
4	A4	37	70.5998	222525	6979.31	SCG2
4	A4	38	70.8942	220759	6963.92	SCG2
4	A4	39	71.1886	218713	6975.18	SCG2
4	A4	40	71.483	216487	7016.1	SCG2
4	A4	41	71.7774	214900	7081.35	SCG2
4	A4	42	72.0719	212525	7158.41	SCG2
4	A4	43	72.3663	209827	7224.47	SCG2
4	A4	44	72.6607	207891	7275.77	SCG2
4	A4	45	72.9551	205499	7318.63	SCG2
4	A4	46	73.2495	203360	7358.8	SCG2
4	A4	47	73.544	200918	7402.29	SCG2
4	A4	48	73.8384	198845	7449.85	SCG2
4	A4	49	74.1328	196798	7493.7	SCG2
4	A4	50	74.4272	193956	7518.79	SCG2
4	A4	51	74.7216	191470	7507.41	SCG2
4	A4	52	75.016	189164	7445.47	SCG2
4	A4	53	75.3105	186999	7327.82	SCG2
4	A4	54	75.6049	184108	7155.06	SCG2
4	A4	55	75.8993	183000	6912.54	SCG2
4	A4	56	76.1937	179207	6671.39	SCG2
4	A4	57	76.4881	179052	6468.7	SCG2
4	A4	58	76.7826	176636	6328.77	SCG2
4	A4	59	77.077	175870	6254.62	SCG2
4	A4	60	77.3714	172524	6230.04	SCG2
4	A4	61	77.6658	171304	6232.81	SCG2
4	A4	62	77.9602	168746	6250.34	SCG2
4	A4	63	78.2546	166768	6289.05	SCG2
4	A4	64	78.5491	165748	6375.61	SCG2
4	A4	65	78.8435	163945	6558.94	SCG2
4	A4	66	79.1379	161447	6924.12	SCG2
4	A4	67	79.4323	159103	7535.25	SCG2
4	A4	68	79.7267	157275	8556.21	SCG2
4	A4	69	80.0212	155269	10314.7	SCG2
4	A4	70	80.3156	153510	13115.6	SCG2
4	A4	71	80.61	151034	17179.6	SCG2
4	A4	72	80.9044	146816	22477.4	SCG2
4	A4	73	81.1988	141739	28572.3	SCG2
4	A4	74	81.4933	130783	34572.3	SCG2
4	A4	75	81.7877	111504	39279.3	SCG2
4	A4	76	82.0821	77777.3	41541.4	SCG2
4	A4	77	82.3765	46913.6	40678	SCG2
4	A4	78	82.6709	31697.7	36771.5	SCG2
4	A4	79	82.9653	28584	30655.4	SCG2
4	A4	80	83.2598	27271.7	23599	SCG2
4	A4	81	83.5542	27430.8	16852.2	SCG2
4	A4	82	83.8486	27143.7	11278.5	SCG2
4	A4	83	84.143	27425.4	7217.61	SCG2
4	A4	84	84.4374	26449.6	3920.68	SCG2
4	A4	85	84.7319	26227.6	1972.88	SCG2
4	A4	86	85.0263	26016.9	916.923	SCG2
4	A4	87	85.3207	26274.9	379.725	SCG2
4	A4	88	85.6151	26437.1	117.573	SCG2
4	A4	89	85.9095	25947.1	-8.57959	SCG2
4	A4	90	86.2039	26262.9	-73.7622	SCG2
4	A4	91	86.4984	25341.5	-118.026	SCG2
4	A4	92	86.7928	25929.8	-159.11	SCG2
4	A4	93	87.0872	25433.6	-197.146	SCG2
4	A4	94	87.3816	25939.9	-221.092	SCG2
4	A4	95	87.676	25673.2	-219.737	SCG2
4	A4	96	87.9705	26626.5	-192.388	SCG2
4	A4	97	88.2649	25182.4	-151.625	SCG2
4	A4	98	88.5593	25020.2	-115.471	SCG2
4	A4	99	88.8537	25358.6	-94.8115	SCG2
4	A4	100	89.1481	25157.5	-86.5054	SCG2
4	A4	101	89.4426	25439.2	-78.2759	SCG2
4	A4	102	89.737	25634.3	-61.4121	SCG2
4	A4	103	90.0314	24831.8	-40.604	SCG2
4	A4	104	90.3258	24631.9	-32.7383	SCG2
4	A4	105	90.6202	24523.3	-55.6514	SCG2
4	A4	106	90.9146	24571.5	-115.255	SCG2
4	A4	107	91.2091	24651.1	-199.71	SCG2
4	A4	108	91.5035	24239.7	-283.629	SCG2
4	A4	109	91.7979	24815.5	-339.315	SCG2
4	A4	110	92.0923	25599.9	-348.788	SCG2
4	A4	111	92.3867	24236.8	-311.028	SCG2
4	A4	112	92.6812	24621.9	-241.634	SCG2
4	A4	113	92.9756	24729.1	-166.157	SCG2
4	A4	114	93.27	24355.5	-110.729	SCG2
4	A4	115	93.5644	24081	-93.7217	SCG2
4	A4	116	93.8588	23743	-120.284	SCG2
4	A4	117	94.1532	23898.1	-180.993	SCG2
4	A4	118	94.4477	24446.5	-255.715	SCG2
4	A4	119	94.7421	24468.3	-322.154	SCG2
5	A5	1	60.0009	252224	7601.08	SCG2
5	A5	2	60.2957	250017	7630.57	SCG2
5	A5	3	60.5905	248287	7655.24	SCG2
5	A5	4	60.8852	246344	7662.21	SCG2
5	A5	5	61.18	244325	7648.73	SCG2
5	A5	6	61.4748	240788	7625.66	SCG2
5	A5	7	61.7696	237882	7611.89	SCG2
5	A5	8	62.0644	237362	7622.19	SCG2
5	A5	9	62.3591	234725	7656.42	SCG2
5	A5	10	62.6539	232368	7697.94	SCG2
5	A5	11	62.9487	229135	7722.86	SCG2
5	A5	12	63.2435	227047	7713.2	SCG2
5	A5	13	63.5383	223759	7665.55	SCG2
5	A5	14	63.833	221481	7590.85	SCG2
5	A5	15	64.1278	219144	7507.87	SCG2
5	A5	16	64.4226	217350	7435.57	SCG2
5	A5	17	64.7174	214001	7388.16	SCG2
5	A5	18	65.0122	211992	7372.88	SCG2
5	A5	19	65.3069	210223	7388.92	SCG2
5	A5	20	65.6017	207470	7427.19	SCG2
5	A5	21	65.8965	205194	7471.69	SCG2
5	A5	22	66.1913	202529	7503.7	SCG2
5	A5	23	66.4861	200358	7508.02	SCG2
5	A5	24	66.7808	197392	7478.39	SCG2
5	A5	25	67.0756	194926	7419.46	SCG2
5	A5	26	67.3704	192453	7343.87	SCG2
5	A5	27	67.6652	190842	7266.68	SCG2
5	A5	28	67.96	188383	7200.48	SCG2
5	A5	29	68.2547	186034	7153.35	SCG2
5	A5	30	68.5495	183182	7128.88	SCG2
5	A5	31	68.8443	181704	7126.35	SCG2
5	A5	32	69.1391	179642	7139.92	SCG2
5	A5	33	69.4339	177378	7158.78	SCG2
5	A5	34	69.7286	174281	7169.75	SCG2
5	A5	35	70.0234	172175	7161.55	SCG2
5	A5	36	70.3182	170554	7128.69	SCG2
5	A5	37	70.613	167778	7073.57	SCG2
5	A5	38	70.9078	165511	6996.2	SCG2
5	A5	39	71.2025	163262	6916.78	SCG2
5	A5	40	71.4973	161348	6865.65	SCG2
5	A5	41	71.7921	159624	6858.36	SCG2
5	A5	42	72.0869	157055	6895.15	SCG2
5	A5	43	72.3817	155999	6959.39	SCG2
5	A5	44	72.6764	152587	7025.34	SCG2
5	A5	45	72.9712	150687	7066.1	SCG2
5	A5	46	73.266	147376	7083.13	SCG2
5	A5	47	73.5608	146016	7088.98	SCG2
5	A5	48	73.8555	144046	7096.23	SCG2
5	A5	49	74.1503	141719	7110.89	SCG2
5	A5	50	74.4451	139474	7126.49	SCG2
5	A5	51	74.7399	136742	7127.16	SCG2
5	A5	52	75.0347	134030	7096.12	SCG2
5	A5	53	75.3294	132583	7018.96	SCG2
5	A5	54	75.6242	130335	6881.19	SCG2
5	A5	55	75.919	127006	6717.67	SCG2
5	A5	56	76.2138	125831	6559.07	SCG2
5	A5	57	76.5086	123958	6434.84	SCG2
5	A5	58	76.8033	122619	6360.9	SCG2
5	A5	59	77.0981	120296	6332.69	SCG2
5	A5	60	77.3929	117914	6328.02	SCG2
5	A5	61	77.6877	115900	6319.26	SCG2
5	A5	62	77.9825	113544	6288.16	SCG2
5	A5	63	78.2772	111994	6236.28	SCG2
5	A5	64	78.572	110272	6189.06	SCG2
5	A5	65	78.8668	107225	6197.68	SCG2
5	A5	66	79.1616	106999	6345.38	SCG2
5	A5	67	79.4564	104328	6762.33	SCG2
5	A5	68	79.7511	102645	7518.05	SCG2
5	A5	69	80.0459	100539	8800.53	SCG2
5	A5	70	80.3407	99011.5	10938.4	SCG2
5	A5	71	80.6355	95840.4	14185	SCG2
5	A5	72	80.9303	92812.3	18653.8	SCG2
5	A5	73	81.225	87836.5	24158.7	SCG2
5	A5	74	81.5198	79200.3	30093.8	SCG2
5	A5	75	81.8146	62365.7	35456.5	SCG2
5	A5	76	82.1094	32050.3	39074.3	SCG2
5	A5	77	82.4042	-2003.15	39992.1	SCG2
5	A5	78	82.6989	-23249.3	37850.6	SCG2
5	A5	79	82.9937	-29159.1	33055.7	SCG2
5	A5	80	83.2885	-29982.9	26634.7	SCG2
5	A5	81	83.5833	-30713.5	19851.8	SCG2
5	A5	82	83.8781	-30425.6	13783.9	SCG2
5	A5	83	84.1728	-30792.2	9052.74	SCG2
5	A5	84	84.4676	-30410.1	5451.83	SCG2
5	A5	85	84.7624	-31083.3	2904.41	SCG2
5	A5	86	85.0572	-31749.3	1499.31	SCG2
5	A5	87	85.352	-31307.2	797.771	SCG2
5	A5	88	85.6467	-31468.3	475.063	SCG2
5	A5	89	85.9415	-31777.7	332.237	SCG2
5	A5	90	86.2363	-32336.5	265.184	SCG2
5	A5	91	86.5311	-31768.9	227.199	SCG2
5	A5	92	86.8259	-32616.8	201.741	SCG2
5	A5	93	87.1206	-32281.4	186.184	SCG2
5	A5	94	87.4154	-32315.5	181.733	SCG2
5	A5	95	87.7102	-32188.3	186.792	SCG2
5	A5	96	88.005	-33204.3	194.488	SCG2
5	A5	97	88.2998	-33184.2	195.253	SCG2
5	A5	98	88.5945	-32964.7	182.263	SCG2
5	A5	99	88.8893	-33076.4	155.461	SCG2
5	A5	100	89.1841	-33369.8	121.393	SCG2
5	A5	101	89.4789	-33496.4	89.6953	SCG2
5	A5	102	89.7737	-33397.9	69.0771	SCG2
5	A5	103	90.0684	-33495.7	64.5659	SCG2
5	A5	104	90.3632	-33432	76.1372	SCG2
5	A5	105	90.658	-33825.1	98.7803	SCG2
5	A5	106	90.9528	-34034.7	124.666	SCG2
5	A5	107	91.2476	-34101.1	147.176	SCG2
5	A5	108	91.5423	-34496.5	164.272	SCG2
5	A5	109	91.8371	-33906.8	178.041	SCG2
5	A5	110	92.1319	-34262.8	190.128	SCG2
5	A5	111	92.4267	-34736.7	196.98	SCG2
5	A5	112	92.7215	-35226.3	189.787	SCG2
5	A5	113	93.0162	-35051	160.02	SCG2
5	A5	114	93.311	-34879.4	106.229	SCG2
5	A5	115	93.6058	-34983.5	36.4878	SCG2
5	A5	116	93.9006	-35437.1	-35.1421	SCG2
5	A5	117	94.1953	-34960.8	-95.0508	SCG2
5	A5	118	94.4901	-34785.2	-135.176	SCG2
5	A5	119	94.7849	-34997	-154.735	SCG2
6	A6	1	60.0009	273896	7694.68	SCG2
6	A6	2	60.2957	272053	7777.87	SCG2
6	A6	3	60.5905	269779	7861.96	SCG2
6	A6	4	60.8852	268606	7929.31	SCG2
6	A6	5	61.18	265597	7969.05	SCG2
6	A6	6	61.4748	262689	7982.83	SCG2
6	A6	7	61.7696	259767	7983.24	SCG2
6	A6	8	62.0644	258655	7986.19	SCG2
6	A6	9	62.3591	255869	8001.95	SCG2
6	A6	10	62.6539	252769	8031.12	SCG2
6	A6	11	62.9487	251269	8066.87	SCG2
6	A6	12	63.2435	248043	8100.97	SCG2
6	A6	13	63.5383	245046	8128.32	SCG2
6	A6	14	63.833	242706	8147.53	SCG2
6	A6	15	64.1278	240437	8158.45	SCG2
6	A6	16	64.4226	238159	8160.36	SCG2
6	A6	17	64.7174	234483	8152.66	SCG2
6	A6	18	65.0122	231847	8136.43	SCG2
6	A6	19	65.3069	230327	8115.18	SCG2
6	A6	20	65.6017	226948	8093.24	SCG2
6	A6	21	65.8965	224287	8073.96	SCG2
6	A6	22	66.1913	222022	8057.89	SCG2
6	A6	23	66.4861	219110	8042.94	SCG2
6	A6	24	66.7808	217392	8025.75	SCG2
6	A6	25	67.0756	214068	8003.67	SCG2
6	A6	26	67.3704	211245	7975.62	SCG2
6	A6	27	67.6652	209146	7940.79	SCG2
6	A6	28	67.96	207175	7897.02	SCG2
6	A6	29	68.2547	204472	7841.66	SCG2
6	A6	30	68.5495	201478	7775.64	SCG2
6	A6	31	68.8443	198551	7707.62	SCG2
6	A6	32	69.1391	196850	7653.07	SCG2
6	A6	33	69.4339	194793	7626.47	SCG2
6	A6	34	69.7286	192471	7631.99	SCG2
6	A6	35	70.0234	190196	7659.82	SCG2
6	A6	36	70.3182	187711	7691.44	SCG2
6	A6	37	70.613	184806	7710.95	SCG2
6	A6	38	70.9078	182256	7713.33	SCG2
6	A6	39	71.2025	180228	7704.98	SCG2
6	A6	40	71.4973	177872	7696.46	SCG2
6	A6	41	71.7921	176137	7693.45	SCG2
6	A6	42	72.0869	172930	7692.75	SCG2
6	A6	43	72.3817	170636	7685.58	SCG2
6	A6	44	72.6764	168380	7664.79	SCG2
6	A6	45	72.9712	165518	7630.86	SCG2
6	A6	46	73.266	163181	7582.68	SCG2
6	A6	47	73.5608	161493	7543.36	SCG2
6	A6	48	73.8555	158493	7526.28	SCG2
6	A6	49	74.1503	156541	7531.59	SCG2
6	A6	50	74.4451	154547	7546.05	SCG2
6	A6	51	74.7399	151373	7548.04	SCG2
6	A6	52	75.0347	148998	7516.17	SCG2
6	A6	53	75.3294	146635	7438.29	SCG2
6	A6	54	75.6242	145022	7316.85	SCG2
6	A6	55	75.919	141140	7168.94	SCG2
6	A6	56	76.2138	140266	7020.85	SCG2
6	A6	57	76.5086	138096	6899.16	SCG2
6	A6	58	76.8033	136070	6821.71	SCG2
6	A6	59	77.0981	133776	6791.98	SCG2
6	A6	60	77.3929	131607	6799.28	SCG2
6	A6	61	77.6877	129821	6824.63	SCG2
6	A6	62	77.9825	127426	6849.74	SCG2
6	A6	63	78.2772	124534	6867.14	SCG2
6	A6	64	78.572	123115	6889.5	SCG2
6	A6	65	78.8668	120932	6959.95	SCG2
6	A6	66	79.1616	118649	7165.69	SCG2
6	A6	67	79.4564	116258	7651.41	SCG2
6	A6	68	79.7511	115236	8439.93	SCG2
6	A6	69	80.0459	112517	9908.34	SCG2
6	A6	70	80.3407	109474	12392.3	SCG2
6	A6	71	80.6355	107673	16211.2	SCG2
6	A6	72	80.9303	104098	21511.5	SCG2
6	A6	73	81.225	99278	28067.4	SCG2
6	A6	74	81.5198	88821.9	35137.9	SCG2
6	A6	75	81.8146	67982.1	41504.6	SCG2
6	A6	76	82.1094	32590.8	45761.4	SCG2
6	A6	77	82.4042	-7371.15	46785.1	SCG2
6	A6	78	82.6989	-30010.7	44181.3	SCG2
6	A6	79	82.9937	-36819.1	38465.3	SCG2
6	A6	80	83.2885	-38125.4	30870.2	SCG2
6	A6	81	83.5833	-38322.3	22884.3	SCG2
6	A6	82	83.8781	-38977.4	15758.2	SCG2
6	A6	83	84.1728	-39111.7	10206.5	SCG2
6	A6	84	84.4676	-38329	6006.42	SCG2
6	A6	85	84.7624	-38548.4	2957.28	SCG2
6	A6	86	85.0572	-39013.6	1296.2	SCG2
6	A6	87	85.352	-38887	493.08	SCG2
6	A6	88	85.6467	-38992.2	141.083	SCG2
6	A6	89	85.9415	-39859.7	-18.896	SCG2
6	A6	90	86.2363	-39811.6	-121.357	SCG2
6	A6	91	86.5311	-39647.2	-214.091	SCG2
6	A6	92	86.8259	-39578.9	-295.595	SCG2
6	A6	93	87.1206	-38799.2	-346.637	SCG2
6	A6	94	87.4154	-39827.2	-352.603	SCG2
6	A6	95	87.7102	-39492.3	-313.886	SCG2
6	A6	96	88.005	-39982	-245.019	SCG2
6	A6	97	88.2998	-39412.7	-167.633	SCG2
6	A6	98	88.5945	-40152.6	-103.314	SCG2
6	A6	99	88.8893	-40307.6	-69.0996	SCG2
6	A6	100	89.1841	-40408.8	-74.7085	SCG2
6	A6	101	89.4789	-40940.6	-120.125	SCG2
6	A6	102	89.7737	-40115.6	-194.312	SCG2
6	A6	103	90.0684	-40688.3	-277.069	SCG2
6	A6	104	90.3632	-40743.6	-344.717	SCG2
6	A6	105	90.658	-39968	-377.884	SCG2
6	A6	106	90.9528	-40504.9	-368.271	SCG2
6	A6	107	91.2476	-40285	-321.508	SCG2
6	A6	108	91.5423	-41174.6	-254.734	SCG2
6	A6	109	91.8371	-40587.2	-189.922	SCG2
6	A6	110	92.1319	-41125.8	-146.13	SCG2
6	A6	111	92.4267	-41172.9	-134.167	SCG2
6	A6	112	92.7215	-41351.2	-155.212	SCG2
6	A6	113	93.0162	-41267.9	-202.285	SCG2
6	A6	114	93.311	-41193.5	-262.599	SCG2
6	A6	115	93.6058	-41936.6	-320.097	SCG2
6	A6	116	93.9006	-40552.5	-358.986	SCG2
6	A6	117	94.1953	-41109.2	-368.663	SCG2
6	A6	118	94.4901	-41498.3	-348.21	SCG2
6	A6	119	94.7849	-41586.6	-307.152	SCG2
7	A7	1	60.0007	323598	7715.26	SCG2
7	A7	2	60.2953	321665	7809.4	SCG2
7	A7	3	60.5899	319773	7891.61	SCG2
7	A7	4	60.8845	317802	7949.7	SCG2
7	A7	5	61.1791	315132	7986.77	SCG2
7	A7	6	61.4737	312515	8014.33	SCG2
7	A7	7	61.7683	309827	8058	SCG2
7	A7	8	62.0629	308338	8126.46	SCG2
7	A7	9	62.3574	306582	8212.32	SCG2
7	A7	10	62.652	302688	8295.17	SCG2
7	A7	11	62.9466	300584	8352.36	SCG2
7	A7	12	63.2412	297583	8371.13	SCG2
7	A7	13	63.5358	294573	8353.75	SCG2
7	A7	14	63.8304	291990	8314.95	SCG2
7	A7	15	64.125	289619	8273.35	SCG2
7	A7	16	64.4196	287089	8242.72	SCG2
7	A7	17	64.7142	284219	8226.85	SCG2
7	A7	18	65.0088	282018	8219.74	SCG2
7	A7	19	65.3034	279662	8210.3	SCG2
7	A7	20	65.598	276131	8188.86	SCG2
7	A7	21	65.8925	273738	8152.42	SCG2
7	A7	22	66.1871	271469	8106.44	SCG2
7	A7	23	66.4817	268447	8062.55	SCG2
7	A7	24	66.7763	266422	8033.59	SCG2
7	A7	25	67.0709	263482	8028.35	SCG2
7	A7	26	67.3655	261793	8047.86	SCG2
7	A7	27	67.6601	258696	8084.8	SCG2
7	A7	28	67.9547	256752	8126.55	SCG2
7	A7	29	68.2493	253662	8160.13	SCG2
7	A7	30	68.5439	250549	8177.07	SCG2
7	A7	31	68.8385	249012	8175.47	SCG2
7	A7	32	69.1331	245738	8159.09	SCG2
7	A7	33	69.4277	243360	8133.95	SCG2
7	A7	34	69.7223	240233	8104.57	SCG2
7	A7	35	70.0168	239011	8071.48	SCG2
7	A7	36	70.3114	235944	8031.98	SCG2
7	A7	37	70.606	233209	7983.6	SCG2
7	A7	38	70.9006	230482	7915.8	SCG2
7	A7	39	71.1952	228527	7854.47	SCG2
7	A7	40	71.4898	225868	7817.04	SCG2
7	A7	41	71.7844	224064	7816.95	SCG2
7	A7	42	72.079	221293	7858.06	SCG2
7	A7	43	72.3736	219414	7935.07	SCG2
7	A7	44	72.6682	216074	8028.11	SCG2
7	A7	45	72.9628	213696	8127.82	SCG2
7	A7	46	73.2574	211465	8243.69	SCG2
7	A7	47	73.5519	208928	8372.22	SCG2
7	A7	48	73.8465	206082	8502.39	SCG2
7	A7	49	74.1411	203401	8613.78	SCG2
7	A7	50	74.4357	200489	8681.16	SCG2
7	A7	51	74.7303	197494	8683.53	SCG2
7	A7	52	75.0249	193585	8613.25	SCG2
7	A7	53	75.3195	192014	8479.81	SCG2
7	A7	54	75.6141	188698	8306.79	SCG2
7	A7	55	75.9087	186563	8122.76	SCG2
7	A7	56	76.2033	184220	7942.08	SCG2
7	A7	57	76.4979	181999	7756.81	SCG2
7	A7	58	76.7925	179495	7607.97	SCG2
7	A7	59	77.0871	177016	7488.59	SCG2
7	A7	60	77.3817	174551	7387.54	SCG2
7	A7	61	77.6762	173152	7294.11	SCG2
7	A7	62	77.9708	169888	7201.06	SCG2
7	A7	63	78.2654	168095	7108.74	SCG2
7	A7	64	78.56	165710	7031.47	SCG2
7	A7	65	78.8546	163685	7006.54	SCG2
7	A7	66	79.1492	161541	7107.04	SCG2
7	A7	67	79.4438	159575	7459.57	SCG2
7	A7	68	79.7384	157963	8204.28	SCG2
7	A7	69	80.033	155181	9416.35	SCG2
7	A7	70	80.3276	153435	11500	SCG2
7	A7	71	80.6222	150830	14748.4	SCG2
7	A7	72	80.9168	148036	19337.3	SCG2
7	A7	73	81.2113	142306	25155.3	SCG2
7	A7	74	81.5059	135731	31653.8	SCG2
7	A7	75	81.8005	120861	37825.6	SCG2
7	A7	76	82.0951	94411.6	42396.2	SCG2
7	A7	77	82.3897	55908.6	44214	SCG2
7	A7	78	82.6843	26034.9	42686.7	SCG2
7	A7	79	82.9789	14158	38042.8	SCG2
7	A7	80	83.2735	11323.5	31264.7	SCG2
7	A7	81	83.5681	11176.8	23720.7	SCG2
7	A7	82	83.8627	11216.7	16688.9	SCG2
7	A7	83	84.1573	11521.3	11002.9	SCG2
7	A7	84	84.4519	11343.9	6655.82	SCG2
7	A7	85	84.7465	10824.8	3359.84	SCG2
7	A7	86	85.0411	11160.1	1490.65	SCG2
7	A7	87	85.3356	10574.6	547.853	SCG2
7	A7	88	85.6302	11802.4	134.2	SCG2
7	A7	89	85.9248	10821.6	-12.8506	SCG2
7	A7	90	86.2194	10519.1	-46.5474	SCG2
7	A7	91	86.514	10937.5	-48.6597	SCG2
7	A7	92	86.8086	10030.2	-57.6699	SCG2
7	A7	93	87.1032	10943.6	-85.2236	SCG2
7	A7	94	87.3978	10142.9	-126.521	SCG2
7	A7	95	87.6924	10306.1	-169.252	SCG2
7	A7	96	87.987	10602.1	-201.874	SCG2
7	A7	97	88.2816	10918.7	-219.572	SCG2
7	A7	98	88.5762	9650.07	-225.961	SCG2
7	A7	99	88.8708	10814.5	-229.93	SCG2
7	A7	100	89.1653	9863.78	-239.552	SCG2
7	A7	101	89.4599	10275.3	-256.78	SCG2
7	A7	102	89.7545	10263.6	-276.118	SCG2
7	A7	103	90.0491	10339.4	-287.677	SCG2
7	A7	104	90.3437	10402	-282.293	SCG2
7	A7	105	90.6383	10018.8	-255.837	SCG2
7	A7	106	90.9329	10378	-211.25	SCG2
7	A7	107	91.2275	10259.7	-158.389	SCG2
7	A7	108	91.5221	10002.3	-111.78	SCG2
7	A7	109	91.8167	9697.94	-86.0532	SCG2
7	A7	110	92.1113	9528.59	-89.6938	SCG2
7	A7	111	92.4059	9449.92	-120.196	SCG2
7	A7	112	92.7005	9966.29	-164.545	SCG2
7	A7	113	92.995	10031.3	-206.062	SCG2
7	A7	114	93.2896	9580.03	-233.437	SCG2
7	A7	115	93.5842	9646.08	-245.416	SCG2
7	A7	116	93.8788	9191.23	-248.058	SCG2
7	A7	117	94.1734	10000.6	-247.808	SCG2
7	A7	118	94.468	9257.42	-246.652	SCG2
7	A7	119	94.7626	9962.1	-242.726	SCG2
8	A8	1	60.0007	307964	7526.91	SCG2
8	A8	2	60.2953	306059	7592.57	SCG2
8	A8	3	60.5899	305065	7688.63	SCG2
8	A8	4	60.8845	303313	7805.22	SCG2
8	A8	5	61.1791	301158	7928.41	SCG2
8	A8	6	61.4737	297764	8025.49	SCG2
8	A8	7	61.7683	295393	8099.59	SCG2
8	A8	8	62.0629	293771	8160.32	SCG2
8	A8	9	62.3574	291054	8202.19	SCG2
8	A8	10	62.652	287974	8218.54	SCG2
8	A8	11	62.9466	285899	8205.47	SCG2
8	A8	12	63.2412	282916	8166.81	SCG2
8	A8	13	63.5358	279570	8114.48	SCG2
8	A8	14	63.8304	277709	8063.91	SCG2
8	A8	15	64.125	275464	8026.56	SCG2
8	A8	16	64.4196	273416	8005.49	SCG2
8	A8	17	64.7142	269900	7996.37	SCG2
8	A8	18	65.0088	268045	7992.43	SCG2
8	A8	19	65.3034	265141	7989.37	SCG2
8	A8	20	65.598	262783	7987.51	SCG2
8	A8	21	65.8925	260504	7990.92	SCG2
8	A8	22	66.1871	257528	8004.5	SCG2
8	A8	23	66.4817	255350	8030.87	SCG2
8	A8	24	66.7763	252831	8067.37	SCG2
8	A8	25	67.0709	250699	8104.3	SCG2
8	A8	26	67.3655	247670	8126.62	SCG2
8	A8	27	67.6601	245464	8119.18	SCG2
8	A8	28	67.9547	242604	8074.14	SCG2
8	A8	29	68.2493	239428	7996.61	SCG2
8	A8	30	68.5439	237222	7875.69	SCG2
8	A8	31	68.8385	235143	7760.7	SCG2
8	A8	32	69.1331	232809	7691.32	SCG2
8	A8	33	69.4277	230623	7682.52	SCG2
8	A8	34	69.7223	228474	7729.62	SCG2
8	A8	35	70.0168	225785	7811.92	SCG2
8	A8	36	70.3114	223583	7902.65	SCG2
8	A8	37	70.606	221210	7978.35	SCG2
8	A8	38	70.9006	218039	8016.88	SCG2
8	A8	39	71.1952	216087	8045.61	SCG2
8	A8	40	71.4898	213362	8081.46	SCG2
8	A8	41	71.7844	210824	8146.85	SCG2
8	A8	42	72.079	208819	8262.81	SCG2
8	A8	43	72.3736	206281	8443.9	SCG2
8	A8	44	72.6682	203943	8696.52	SCG2
8	A8	45	72.9628	200462	9020.45	SCG2
8	A8	46	73.2574	197843	9409.9	SCG2
8	A8	47	73.5519	194891	9851.9	SCG2
8	A8	48	73.8465	191835	10321.6	SCG2
8	A8	49	74.1411	187619	10779.1	SCG2
8	A8	50	74.4357	183890	11171	SCG2
8	A8	51	74.7303	179948	11440.1	SCG2
8	A8	52	75.0249	173962	11539.5	SCG2
8	A8	53	75.3195	170475	11446.8	SCG2
8	A8	54	75.6141	165889	11171.3	SCG2
8	A8	55	75.9087	162309	10751.8	SCG2
8	A8	56	76.2033	158326	10245.4	SCG2
8	A8	57	76.4979	155952	9711.39	SCG2
8	A8	58	76.7925	153357	9196.21	SCG2
8	A8	59	77.0871	150589	8725.44	SCG2
8	A8	60	77.3817	147649	8305.49	SCG2
8	A8	61	77.6762	145588	7915.28	SCG2
8	A8	62	77.9708	143070	7452.92	SCG2
8	A8	63	78.2654	140742	7063.68	SCG2
8	A8	64	78.56	139046	6770.45	SCG2
8	A8	65	78.8546	137892	6606.75	SCG2
8	A8	66	79.1492	136156	6619.45	SCG2
8	A8	67	79.4438	132804	6883.92	SCG2
8	A8	68	79.7384	131704	7528.29	SCG2
8	A8	69	80.033	129766	8525.77	SCG2
8	A8	70	80.3276	128067	9989.71	SCG2
8	A8	71	80.6222	125280	12239.1	SCG2
8	A8	72	80.9168	122093	15378.8	SCG2
8	A8	73	81.2113	118598	19314.4	SCG2
8	A8	74	81.5059	111798	23654	SCG2
8	A8	75	81.8005	100454	27699.2	SCG2
8	A8	76	82.0951	80822.9	30583.6	SCG2
8	A8	77	82.3897	51122.4	31544.6	SCG2
8	A8	78	82.6843	27539.2	30220.5	SCG2
8	A8	79	82.9789	20974.5	26818.8	SCG2
8	A8	80	83.2735	19510.3	22052.3	SCG2
8	A8	81	83.5681	20357.8	16869.6	SCG2
8	A8	82	83.8627	19374.2	12124.1	SCG2
8	A8	83	84.1573	19360.6	8343.4	SCG2
8	A8	84	84.4519	18804	4731.25	SCG2
8	A8	85	84.7465	19426.9	2358.41	SCG2
8	A8	86	85.0411	19326.4	1012.93	SCG2
8	A8	87	85.3356	19154.2	327.619	SCG2
8	A8	88	85.6302	19094.1	21.1294	SCG2
8	A8	89	85.9248	19246	-86.7441	SCG2
8	A8	90	86.2194	19361.1	-97.7568	SCG2
8	A8	91	86.514	18484.9	-65.6855	SCG2
8	A8	92	86.8086	19588.1	-19.7456	SCG2
8	A8	93	87.1032	18342.3	22.0312	SCG2
8	A8	94	87.3978	18607.1	46.9009	SCG2
8	A8	95	87.6924	18575.1	45.6704	SCG2
8	A8	96	87.987	18524.9	13.1504	SCG2
8	A8	97	88.2816	18125.9	-49.7295	SCG2
8	A8	98	88.5762	18073	-133.095	SCG2
8	A8	99	88.8708	18000.1	-217.672	SCG2
8	A8	100	89.1653	18555.5	-279.941	SCG2
8	A8	101	89.4599	19367.7	-302.591	SCG2
8	A8	102	89.7545	18254.5	-284.146	SCG2
8	A8	103	90.0491	18266.6	-240.151	SCG2
8	A8	104	90.3437	17881.7	-194.193	SCG2
8	A8	105	90.6383	18552.2	-165.116	SCG2
8	A8	106	90.9329	18410.1	-159.21	SCG2
8	A8	107	91.2275	17856.5	-170.783	SCG2
8	A8	108	91.5221	18043.8	-187.805	SCG2
8	A8	109	91.8167	18243.8	-197.748	SCG2
8	A8	110	92.1113	18463.9	-191.754	SCG2
8	A8	111	92.4059	17976.5	-167.589	SCG2
8	A8	112	92.7005	18136.1	-131.068	SCG2
8	A8	113	92.995	18030.3	-94.2563	SCG2
8	A8	114	93.2896	17388.1	-70.0859	SCG2
8	A8	115	93.5842	17788.6	-65.9365	SCG2
8	A8	116	93.8788	17754.1	-80.3638	SCG2
8	A8	117	94.1734	17780.3	-104.967	SCG2
8	A8	118	94.468	17359.2	-129.762	SCG2
8	A8	119	94.7626	17774.6	-148.169	SCG2
9	A9	1	60.001	294429	8650.42	SCG2
9	A9	2	60.2958	293433	8757.73	SCG2
9	A9	3	60.5907	290685	8865	SCG2
9	A9	4	60.8855	289336	8969.08	SCG2
9	A9	5	61.1803	285806	9047.71	SCG2
9	A9	6	61.4752	283019	9087.55	SCG2
9	A9	7	61.77	280311	9089.28	SCG2
9	A9	8	62.0648	277342	9065.85	SCG2
9	A9	9	62.3597	274492	9035.59	SCG2
9	A9	10	62.6545	272007	9014.53	SCG2
9	A9	11	62.9494	269860	9011.67	SCG2
9	A9	12	63.2442	265912	9028.52	SCG2
9	A9	13	63.539	264082	9061.33	SCG2
9	A9	14	63.8339	260504	9102.93	SCG2
9	A9	15	64.1287	258187	9144.17	SCG2
9	A9	16	64.4235	255412	9175.65	SCG2
9	A9	17	64.7184	252490	9191.03	SCG2
9	A9	18	65.0132	248666	9189.63	SCG2
9	A9	19	65.308	246162	9176.45	SCG2
9	A9	20	65.6029	244056	9158.87	SCG2
9	A9	21	65.8977	240397	9141.8	SCG2
9	A9	22	66.1925	237746	9125.5	SCG2
9	A9	23	66.4874	234855	9106.4	SCG2
9	A9	24	66.7822	232081	9080.26	SCG2
9	A9	25	67.077	229499	9045.28	SCG2
9	A9	26	67.3719	226215	9002.51	SCG2
9	A9	27	67.6667	223190	8954.6	SCG2
9	A9	28	67.9616	221552	8903.59	SCG2
9	A9	29	68.2564	218553	8850.21	SCG2
9	A9	30	68.5512	214935	8796.15	SCG2
9	A9	31	68.8461	212741	8744.82	SCG2
9	A9	32	69.1409	209762	8698.85	SCG2
9	A9	33	69.4357	208060	8676.06	SCG2
9	A9	34	69.7306	204770	8677.7	SCG2
9	A9	35	70.0254	202371	8696.22	SCG2
9	A9	36	70.3202	199709	8719.35	SCG2
9	A9	37	70.6151	196265	8736.49	SCG2
9	A9	38	70.9099	194737	8742.99	SCG2
9	A9	39	71.2048	191318	8741.1	SCG2
9	A9	40	71.4996	188931	8738.18	SCG2
9	A9	41	71.7944	186428	8745.89	SCG2
9	A9	42	72.0893	183302	8774.74	SCG2
9	A9	43	72.3841	180763	8836.95	SCG2
9	A9	44	72.6789	178583	8945.09	SCG2
9	A9	45	72.9738	175700	9103.44	SCG2
9	A9	46	73.2686	172718	9306.19	SCG2
9	A9	47	73.5634	169960	9536.86	SCG2
9	A9	48	73.8583	166503	9770.25	SCG2
9	A9	49	74.1531	163558	9975.33	SCG2
9	A9	50	74.4479	160417	10119.7	SCG2
9	A9	51	74.7428	156344	10175.7	SCG2
9	A9	52	75.0376	152734	10127.8	SCG2
9	A9	53	75.3324	150122	9978.84	SCG2
9	A9	54	75.6273	146292	9750.82	SCG2
9	A9	55	75.9221	143643	9479.28	SCG2
9	A9	56	76.2169	141119	9201.76	SCG2
9	A9	57	76.5118	139087	8945.81	SCG2
9	A9	58	76.8066	135474	8715.18	SCG2
9	A9	59	77.1015	133734	8475.55	SCG2
9	A9	60	77.3963	130434	8255.56	SCG2
9	A9	61	77.6911	128018	8045.93	SCG2
9	A9	62	77.986	126000	7850.72	SCG2
9	A9	63	78.2808	123137	7687.89	SCG2
9	A9	64	78.5756	121670	7584.04	SCG2
9	A9	65	78.8705	119579	7571.02	SCG2
9	A9	66	79.1653	117098	7694.24	SCG2
9	A9	67	79.4601	114129	8036.67	SCG2
9	A9	68	79.755	112520	8753.77	SCG2
9	A9	69	80.0498	109517	9857.35	SCG2
9	A9	70	80.3447	107584	11767.8	SCG2
9	A9	71	80.6395	105563	14800.2	SCG2
9	A9	72	80.9343	101565	19173.3	SCG2
9	A9	73	81.2292	96559.5	24836.7	SCG2
9	A9	74	81.524	88678	31307.8	SCG2
9	A9	75	81.8188	74620.3	37623.4	SCG2
9	A9	76	82.1137	47696.8	42501.7	SCG2
9	A9	77	82.4085	10338.5	44720.1	SCG2
9	A9	78	82.7033	-18642.2	43571.8	SCG2
9	A9	79	82.9982	-26436.2	39176.6	SCG2
9	A9	80	83.293	-28214.2	32461.6	SCG2
9	A9	81	83.5878	-27676.2	24811.7	SCG2
9	A9	82	83.8827	-28343.3	17573.4	SCG2
9	A9	83	84.1775	-28280.6	11661.3	SCG2
9	A9	84	84.4723	-28856.3	7123.26	SCG2
9	A9	85	84.7672	-28497.7	3830.58	SCG2
9	A9	86	85.062	-28597.2	1976.83	SCG2
9	A9	87	85.3568	-28890.2	1055.26	SCG2
9	A9	88	85.6517	-29785.3	651.222	SCG2
9	A9	89	85.9465	-29424.5	486.88	SCG2
9	A9	90	86.2414	-30258.3	406.378	SCG2
9	A9	91	86.5362	-30496.5	341.468	SCG2
9	A9	92	86.831	-30116.7	278.021	SCG2
9	A9	93	87.1259	-29932.1	228.309	SCG2
9	A9	94	87.4207	-30548.3	208.896	SCG2
9	A9	95	87.7155	-30133	225.873	SCG2
9	A9	96	88.0104	-31041.7	270.252	SCG2
9	A9	97	88.3052	-31384.5	323.521	SCG2
9	A9	98	88.6	-31198.2	368.182	SCG2
9	A9	99	88.8949	-31363.2	395.872	SCG2
9	A9	100	89.1897	-31841.3	408.631	SCG2
9	A9	101	89.4845	-32099.9	414.11	SCG2
9	A9	102	89.7794	-32017.7	418.869	SCG2
9	A9	103	90.0742	-32139.9	423.524	SCG2
9	A9	104	90.369	-32963.4	421.788	SCG2
9	A9	105	90.6639	-32764.4	403.862	SCG2
9	A9	106	90.9587	-33408	363.15	SCG2
9	A9	107	91.2536	-33499	302.993	SCG2
9	A9	108	91.5484	-33213	238.49	SCG2
9	A9	109	91.8432	-33318.7	190.293	SCG2
9	A9	110	92.1381	-32728.6	172.753	SCG2
9	A9	111	92.4329	-34465.1	184.127	SCG2
9	A9	112	92.7277	-34125.6	206.411	SCG2
9	A9	113	93.0226	-34200.9	215.725	SCG2
9	A9	114	93.3174	-34532.5	196.133	SCG2
9	A9	115	93.6122	-34201.2	147.442	SCG2
9	A9	116	93.9071	-34688.6	82.7344	SCG2
9	A9	117	94.2019	-34285.8	19.0947	SCG2
9	A9	118	94.4967	-35119.2	-31.3926	SCG2
9	A9	119	94.7916	-34148.5	-65.499	SCG2
13	B1	1	60.0006	302508	8594.71	SCG2
13	B1	2	60.2954	298729	8602.15	SCG2
13	B1	3	60.5901	297305	8598.02	SCG2
13	B1	4	60.8849	294297	8582.33	SCG2
13	B1	5	61.1797	293076	8562	SCG2
13	B1	6	61.4744	288879	8547.19	SCG2
13	B1	7	61.7692	287525	8547.03	SCG2
13	B1	8	62.064	284254	8566.34	SCG2
13	B1	9	62.3587	281894	8604.47	SCG2
13	B1	10	62.6535	279169	8654.28	SCG2
13	B1	11	62.9482	275761	8701.95	SCG2
13	B1	12	63.243	274185	8728.56	SCG2
13	B1	13	63.5378	271058	8716.06	SCG2
13	B1	14	63.8325	267156	8655.68	SCG2
13	B1	15	64.1273	264472	8554.55	SCG2
13	B1	16	64.4221	261578	8434.7	SCG2
13	B1	17	64.7168	259638	8323.79	SCG2
13	B1	18	65.0116	256378	8242.9	SCG2
13	B1	19	65.3064	255162	8198.86	SCG2
13	B1	20	65.6011	252058	8184.57	SCG2
13	B1	21	65.8959	248179	8185.71	SCG2
13	B1	22	66.1907	247071	8188.05	SCG2
13	B1	23	66.4854	243698	8181.68	SCG2
13	B1	24	66.7802	241813	8162.24	SCG2
13	B1	25	67.075	238407	8130.17	SCG2
13	B1	26	67.3697	235481	8089.13	SCG2
13	B1	27	67.6645	234227	8043.96	SCG2
13	B1	28	67.9593	231344	7999.07	SCG2
13	B1	29	68.254	228940	7959.02	SCG2
13	B1	30	68.5488	225475	7925.95	SCG2
13	B1	31	68.8436	223537	7909.1	SCG2
13	B1	32	69.1383	221812	7920.99	SCG2
13	B1	33	69.4331	219426	7949.6	SCG2
13	B1	34	69.7279	216819	7973.82	SCG2
13	B1	35	70.0226	213080	7981.87	SCG2
13	B1	36	70.3174	211572	7962.79	SCG2
13	B1	37	70.6122	209225	7909.55	SCG2
13	B1	38	70.9069	206147	7829.95	SCG2
13	B1	39	71.2017	203597	7763.3	SCG2
13	B1	40	71.4964	202122	7737.11	SCG2
13	B1	41	71.7912	200217	7768.31	SCG2
13	B1	42	72.086	197000	7861.25	SCG2
13	B1	43	72.3807	194356	7991.42	SCG2
13	B1	44	72.6755	192784	8138.75	SCG2
13	B1	45	72.9703	189146	8327.17	SCG2
13	B1	46	73.265	187504	8558.65	SCG2
13	B1	47	73.5598	184102	8829.11	SCG2
13	B1	48	73.8546	181707	9121.21	SCG2
13	B1	49	74.1493	178641	9401.39	SCG2
13	B1	50	74.4441	174928	9623.97	SCG2
13	B1	51	74.7389	171737	9742.23	SCG2
13	B1	52	75.0336	166544	9722.07	SCG2
13	B1	53	75.3284	164612	9553.08	SCG2
13	B1	54	75.6232	161605	9252.02	SCG2
13	B1	55	75.9179	157212	8859.05	SCG2
13	B1	56	76.2127	155604	8427.47	SCG2
13	B1	57	76.5075	153581	8010.71	SCG2
13	B1	58	76.8022	151335	7531.73	SCG2
13	B1	59	77.097	149499	7135.8	SCG2
13	B1	60	77.3918	147354	6858.85	SCG2
13	B1	61	77.6865	144603	6689.28	SCG2
13	B1	62	77.9813	143401	6608.77	SCG2
13	B1	63	78.276	141207	6601.22	SCG2
13	B1	64	78.5708	139694	6661.29	SCG2
13	B1	65	78.8656	136410	6806.37	SCG2
13	B1	66	79.1603	134693	7095.01	SCG2
13	B1	67	79.4551	132738	7648.6	SCG2
13	B1	68	79.7499	130795	8454.65	SCG2
13	B1	69	80.0446	128610	9700.04	SCG2
13	B1	70	80.3394	125852	11687.7	SCG2
13	B1	71	80.6342	123081	14589.2	SCG2
13	B1	72	80.9289	119731	18420.4	SCG2
13	B1	73	81.2237	112805	22922.3	SCG2
13	B1	74	81.5185	103894	27498.2	SCG2
13	B1	75	81.8132	86258.2	31283.8	SCG2
13	B1	76	82.108	58428.2	33373.9	SCG2
13	B1	77	82.4028	30927.4	33143.5	SCG2
13	B1	78	82.6975	18838.2	30509.5	SCG2
13	B1	79	82.9923	16323.4	25989.6	SCG2
13	B1	80	83.2871	15926.2	20513.5	SCG2
13	B1	81	83.5818	15426.5	15085.9	SCG2
13	B1	82	83.8766	15307.4	10471.9	SCG2
13	B1	83	84.1714	16172.2	6667.56	SCG2
13	B1	84	84.4661	15598.7	3479.44	SCG2
13	B1	85	84.7609	15085.7	1615.83	SCG2
13	B1	86	85.0557	15292.2	636.07	SCG2
13	B1	87	85.3504	14627.8	154.007	SCG2
13	B1	88	85.6452	13948.5	-92.9751	SCG2
13	B1	89	85.9399	14521.9	-245.008	SCG2
13	B1	90	86.2347	15009.9	-356.566	SCG2
13	B1	91	86.5295	14619	-439.434	SCG2
13	B1	92	86.8242	13641.1	-493.727	SCG2
13	B1	93	87.119	14294.7	-521.948	SCG2
13	B1	94	87.4138	14887.1	-530.891	SCG2
13	B1	95	87.7085	14411	-529.155	SCG2
13	B1	96	88.0033	13688.9	-524.344	SCG2
13	B1	97	88.2981	13824.4	-520.032	SCG2
13	B1	98	88.5928	13923.9	-513.465	SCG2
13	B1	99	88.8876	14622.6	-497.119	SCG2
13	B1	100	89.1824	14101.7	-465.329	SCG2
13	B1	101	89.4771	13809.4	-421.498	SCG2
13	B1	102	89.7719	12733.4	-379.331	SCG2
13	B1	103	90.0667	14198.9	-356.466	SCG2
13	B1	104	90.3614	13440.5	-365.337	SCG2
13	B1	105	90.6562	12781.8	-407.095	SCG2
13	B1	106	90.951	13307.3	-470.567	SCG2
13	B1	107	91.2457	12853.4	-535.342	SCG2
13	B1	108	91.5405	13868.9	-578.577	SCG2
13	B1	109	91.8353	13754.4	-584.854	SCG2
13	B1	110	92.13	13001.4	-555.111	SCG2
13	B1	111	92.4248	12765	-508.104	SCG2
13	B1	112	92.7196	13165.8	-471.124	SCG2
13	B1	113	93.0143	12219.1	-464.617	SCG2
13	B1	114	93.3091	12711	-490.634	SCG2
13	B1	115	93.6039	13257.2	-532.885	SCG2
13	B1	116	93.8986	12968	-567.958	SCG2
13	B1	117	94.1934	12930.3	-579.826	SCG2
13	B1	118	94.4881	12171.5	-567.966	SCG2
13	B1	119	94.7829	12567.6	-544.76	SCG2
14	B2	1	60.0006	314182	8723.38	SCG2
14	B2	2	60.2954	312363	8731.41	SCG2
14	B2	3	60.5901	309673	8753.97	SCG2
14	B2	4	60.8849	307890	8783.03	SCG2
14	B2	5	61.1797	304682	8808.53	SCG2
14	B2	6	61.4744	301585	8820.49	SCG2
14	B2	7	61.7692	299352	8811.72	SCG2
14	B2	8	62.064	295803	8780.52	SCG2
14	B2	9	62.3587	293016	8731.48	SCG2
14	B2	10	62.6535	289751	8673.55	SCG2
14	B2	11	62.9482	287332	8615.77	SCG2
14	B2	12	63.243	284803	8562.8	SCG2
14	B2	13	63.5378	281731	8512.87	SCG2
14	B2	14	63.8325	278119	8460	SCG2
14	B2	15	64.1273	276796	8398.65	SCG2
14	B2	16	64.4221	273017	8327.9	SCG2
14	B2	17	64.7168	269593	8252.44	SCG2
14	B2	18	65.0116	267710	8179.9	SCG2
14	B2	19	65.3064	265721	8116.23	SCG2
14	B2	20	65.6011	262024	8063.24	SCG2
14	B2	21	65.8959	259844	8019.71	SCG2
14	B2	22	66.1907	256903	7984.55	SCG2
14	B2	23	66.4854	254526	7958.64	SCG2
14	B2	24	66.7802	251596	7943.55	SCG2
14	B2	25	67.075	250148	7938.09	SCG2
14	B2	26	67.3697	246494	7936.37	SCG2
14	B2	27	67.6645	244299	7929.1	SCG2
14	B2	28	67.9593	242076	7908.07	SCG2
14	B2	29	68.254	238614	7871.45	SCG2
14	B2	30	68.5488	236508	7826.26	SCG2
14	B2	31	68.8436	233669	7785.77	SCG2
14	B2	32	69.1383	231597	7762.65	SCG2
14	B2	33	69.4331	229705	7761.28	SCG2
14	B2	34	69.7279	226506	7774.1	SCG2
14	B2	35	70.0226	224318	7784.81	SCG2
14	B2	36	70.3174	222086	7777.82	SCG2
14	B2	37	70.6122	218580	7747.37	SCG2
14	B2	38	70.9069	216033	7690.8	SCG2
14	B2	39	71.2017	214255	7645.55	SCG2
14	B2	40	71.4964	212082	7636.4	SCG2
14	B2	41	71.7912	210080	7668.82	SCG2
14	B2	42	72.086	207432	7725.46	SCG2
14	B2	43	72.3807	204577	7770.52	SCG2
14	B2	44	72.6755	201541	7789.97	SCG2
14	B2	45	72.9703	198942	7789.72	SCG2
14	B2	46	73.265	196414	7781.87	SCG2
14	B2	47	73.5598	195274	7779.99	SCG2
14	B2	48	73.8546	192136	7787.69	SCG2
14	B2	49	74.1493	189351	7794.97	SCG2
14	B2	50	74.4441	186137	7784.37	SCG2
14	B2	51	74.7389	184809	7738.92	SCG2
14	B2	52	75.0336	180860	7635.79	SCG2
14	B2	53	75.3284	178963	7502.03	SCG2
14	B2	54	75.6232	176993	7362.41	SCG2
14	B2	55	75.9179	174581	7239.16	SCG2
14	B2	56	76.2127	172826	7142.18	SCG2
14	B2	57	76.5075	169867	7066.55	SCG2
14	B2	58	76.8022	167805	6997.87	SCG2
14	B2	59	77.097	165873	6921.74	SCG2
14	B2	60	77.3918	162572	6831.98	SCG2
14	B2	61	77.6865	161018	6733.43	SCG2
14	B2	62	77.9813	159555	6638.66	SCG2
14	B2	63	78.276	156526	6562.76	SCG2
14	B2	64	78.5708	155025	6522.14	SCG2
14	B2	65	78.8656	153091	6541.44	SCG2
14	B2	66	79.1603	150209	6670.69	SCG2
14	B2	67	79.4551	149041	7009.45	SCG2
14	B2	68	79.7499	146407	7732.75	SCG2
14	B2	69	80.0446	144575	8747.69	SCG2
14	B2	70	80.3394	142948	10488	SCG2
14	B2	71	80.6342	139651	13214.2	SCG2
14	B2	72	80.9289	136847	17079.4	SCG2
14	B2	73	81.2237	132269	21987.4	SCG2
14	B2	74	81.5185	124293	27465.3	SCG2
14	B2	75	81.8132	109688	32647.6	SCG2
14	B2	76	82.108	81812	36445.2	SCG2
14	B2	77	82.4028	46197.8	37883.9	SCG2
14	B2	78	82.6975	21652.7	36479.1	SCG2
14	B2	79	82.9923	13325.1	32453	SCG2
14	B2	80	83.2871	12607.2	26665.4	SCG2
14	B2	81	83.5818	12053.5	20289.5	SCG2
14	B2	82	83.8766	11893.1	14402.2	SCG2
14	B2	83	84.1714	13170.1	9688.19	SCG2
14	B2	84	84.4661	11221.7	5861.17	SCG2
14	B2	85	84.7609	12002.4	3022.95	SCG2
14	B2	86	85.0557	11823.5	1433.79	SCG2
14	B2	87	85.3504	11634	639.399	SCG2
14	B2	88	85.6452	11523.7	287.504	SCG2
14	B2	89	85.9399	11173.3	152.8	SCG2
14	B2	90	86.2347	11307.2	110.05	SCG2
14	B2	91	86.5295	11343.9	95.1753	SCG2
14	B2	92	86.8242	10322.6	76.3706	SCG2
14	B2	93	87.119	10591.6	39.9941	SCG2
14	B2	94	87.4138	10399.2	-14.1841	SCG2
14	B2	95	87.7085	11241.3	-76.2964	SCG2
14	B2	96	88.0033	10092.2	-132.601	SCG2
14	B2	97	88.2981	11067.1	-173.176	SCG2
14	B2	98	88.5928	10157.2	-196.461	SCG2
14	B2	99	88.8876	10829.8	-207.782	SCG2
14	B2	100	89.1824	9974.71	-213.445	SCG2
14	B2	101	89.4771	10481.5	-215.237	SCG2
14	B2	102	89.7719	10360.2	-209.843	SCG2
14	B2	103	90.0667	10603	-194.17	SCG2
14	B2	104	90.3614	10609.4	-172.837	SCG2
14	B2	105	90.6562	9737.04	-161.355	SCG2
14	B2	106	90.951	9866.32	-180.349	SCG2
14	B2	107	91.2457	9781.81	-242.325	SCG2
14	B2	108	91.5405	9708.9	-339.137	SCG2
14	B2	109	91.8353	9866.32	-440.105	SCG2
14	B2	110	92.13	11411.7	-505.066	SCG2
14	B2	111	92.4248	11199.8	-506.101	SCG2
14	B2	112	92.7196	9837.35	-443.918	SCG2
14	B2	113	93.0143	10084.8	-346.972	SCG2
14	B2	114	93.3091	9935.56	-253.579	SCG2
14	B2	115	93.6039	10053.1	-190.067	SCG2
14	B2	116	93.8986	10570.9	-160.28	SCG2
14	B2	117	94.1934	9956.57	-151.399	SCG2
14	B2	118	94.4881	10323.5	-148.011	SCG2
14	B2	119	94.7829	9205.22	-142.18	SCG2
15	B3	1	60.0007	311994	8420.24	SCG2
15	B3	2	60.2951	309576	8444.66	SCG2
15	B3	3	60.5895	307542	8463.81	SCG2
15	B3	4	60.884	304440	8474.69	SCG2
15	B3	5	61.1784	302160	8483.07	SCG2
15	B3	6	61.4728	300072	8498.32	SCG2
15	B3	7	61.7672	297582	8526.46	SCG2
15	B3	8	62.0616	294408	8565.42	SCG2
15	B3	9	62.356	291899	8605.44	SCG2
15	B3	10	62.6505	289182	8633.01	SCG2
15	B3	11	62.9449	286450	8636.06	SCG2
15	B3	12	63.2393	282942	8608.88	SCG2
15	B3	13	63.5337	281196	8555.22	SCG2
15	B3	14	63.8281	276908	8488.59	SCG2
15	B3	15	64.1226	274911	8427.6	SCG2
15	B3	16	64.417	271956	8387.92	SCG2
15	B3	17	64.7114	270222	8374.22	SCG2
15	B3	18	65.0058	266691	8377.78	SCG2
15	B3	19	65.3002	264937	8381.51	SCG2
15	B3	20	65.5947	260890	8369.44	SCG2
15	B3	21	65.8891	258435	8334.47	SCG2
15	B3	22	66.1835	255814	8280.62	SCG2
15	B3	23	66.4779	253167	8218.68	SCG2
15	B3	24	66.7723	250916	8160.03	SCG2
15	B3	25	67.0667	247671	8110.69	SCG2
15	B3	26	67.3612	245349	8069.23	SCG2
15	B3	27	67.6556	243234	8028.22	SCG2
15	B3	28	67.95	240884	7979.99	SCG2
15	B3	29	68.2444	237443	7923.36	SCG2
15	B3	30	68.5388	234328	7867.09	SCG2
15	B3	31	68.8333	232867	7825.61	SCG2
15	B3	32	69.1277	230896	7809.47	SCG2
15	B3	33	69.4221	227996	7816.59	SCG2
15	B3	34	69.7165	225817	7831.34	SCG2
15	B3	35	70.0109	222804	7832.18	SCG2
15	B3	36	70.3054	220056	7802.59	SCG2
15	B3	37	70.5998	218026	7738.46	SCG2
15	B3	38	70.8942	215483	7649.28	SCG2
15	B3	39	71.1886	212802	7553.5	SCG2
15	B3	40	71.483	210658	7471.32	SCG2
15	B3	41	71.7774	208702	7417.27	SCG2
15	B3	42	72.0719	206463	7394.56	SCG2
15	B3	43	72.3663	204124	7398.77	SCG2
15	B3	44	72.6607	201655	7412.06	SCG2
15	B3	45	72.9551	199407	7416.3	SCG2
15	B3	46	73.2495	196715	7396.44	SCG2
15	B3	47	73.544	194709	7336.94	SCG2
15	B3	48	73.8384	191873	7246.27	SCG2
15	B3	49	74.1328	189591	7140.92	SCG2
15	B3	50	74.4272	187617	7043.11	SCG2
15	B3	51	74.7216	185508	6972.52	SCG2
15	B3	52	75.016	183359	6938.02	SCG2
15	B3	53	75.3105	181464	6934.26	SCG2
15	B3	54	75.6049	179515	6945.08	SCG2
15	B3	55	75.8993	176267	6952.12	SCG2
15	B3	56	76.1937	174442	6943	SCG2
15	B3	57	76.4881	172593	6914.83	SCG2
15	B3	58	76.7826	170210	6871.68	SCG2
15	B3	59	77.077	168066	6819.93	SCG2
15	B3	60	77.3714	166024	6765.09	SCG2
15	B3	61	77.6658	163712	6712.58	SCG2
15	B3	62	77.9602	161623	6670.68	SCG2
15	B3	63	78.2546	159692	6653.82	SCG2
15	B3	64	78.5491	157718	6687.33	SCG2
15	B3	65	78.8435	155545	6817.01	SCG2
15	B3	66	79.1379	153760	7128.01	SCG2
15	B3	67	79.4323	151276	7706.84	SCG2
15	B3	68	79.7267	149396	8714.82	SCG2
15	B3	69	80.0212	146892	10481.7	SCG2
15	B3	70	80.3156	145013	13322.3	SCG2
15	B3	71	80.61	142364	17472	SCG2
15	B3	72	80.9044	139124	22916.8	SCG2
15	B3	73	81.1988	132795	29228.1	SCG2
15	B3	74	81.4933	121868	35503.1	SCG2
15	B3	75	81.7877	100942	40509	SCG2
15	B3	76	82.0821	66738.2	43036.5	SCG2
15	B3	77	82.3765	33600.5	42340.5	SCG2
15	B3	78	82.6709	15377.5	38452.1	SCG2
15	B3	79	82.9653	10866.4	32189	SCG2
15	B3	80	83.2598	10699.1	24848	SCG2
15	B3	81	83.5542	10196.8	17740.9	SCG2
15	B3	82	83.8486	9892.67	11804.8	SCG2
15	B3	83	84.143	10532.1	7440.56	SCG2
15	B3	84	84.4374	10113.3	3979.42	SCG2
15	B3	85	84.7319	9550.85	1946.64	SCG2
15	B3	86	85.0263	10002.6	877.223	SCG2
15	B3	87	85.3207	9777.99	373.68	SCG2
15	B3	88	85.6151	10197.6	165.573	SCG2
15	B3	89	85.9095	9430.4	94.9053	SCG2
15	B3	90	86.2039	9657.39	79.1484	SCG2
15	B3	91	86.4984	9544.65	78.5317	SCG2
15	B3	92	86.7928	9374.58	75.7349	SCG2
15	B3	93	87.0872	9200.35	65.5815	SCG2
15	B3	94	87.3816	9321.6	49.916	SCG2
15	B3	95	87.676	9220.32	34.3247	SCG2
15	B3	96	87.9705	9293.33	25.2231	SCG2
15	B3	97	88.2649	8815.03	27.0586	SCG2
15	B3	98	88.5593	9509.88	40.1182	SCG2
15	B3	99	88.8537	8845.51	59.8862	SCG2
15	B3	100	89.1481	9048.67	78.7993	SCG2
15	B3	101	89.4426	8396.67	90.1558	SCG2
15	B3	102	89.737	8847.58	92.0518	SCG2
15	B3	103	90.0314	8398.72	88.3413	SCG2
15	B3	104	90.3258	8761.82	85.1597	SCG2
15	B3	105	90.6202	8639.69	85.0024	SCG2
15	B3	106	90.9146	8379.1	82.9043	SCG2
15	B3	107	91.2091	8099.76	68.2881	SCG2
15	B3	108	91.5035	8135.78	32	SCG2
15	B3	109	91.7979	7655.33	-26.2241	SCG2
15	B3	110	92.0923	8548.96	-95.1655	SCG2
15	B3	111	92.3867	8058.24	-156.415	SCG2
15	B3	112	92.6812	8364.71	-192.703	SCG2
15	B3	113	92.9756	8645.08	-195.106	SCG2
15	B3	114	93.27	7988.73	-165.55	SCG2
15	B3	115	93.5644	8092.41	-114.685	SCG2
15	B3	116	93.8588	8809.02	-57.6523	SCG2
15	B3	117	94.1532	7723.28	-9.81494	SCG2
15	B3	118	94.4477	7691.07	17.1016	SCG2
15	B3	119	94.7421	7661.79	18.314	SCG2
16	B4	1	60.0007	331984	8473.8	SCG2
16	B4	2	60.2951	329502	8507.55	SCG2
16	B4	3	60.5895	326790	8562.92	SCG2
16	B4	4	60.884	325829	8642.9	SCG2
16	B4	5	61.1784	322537	8745.22	SCG2
16	B4	6	61.4728	320230	8856.36	SCG2
16	B4	7	61.7672	318532	8951.59	SCG2
16	B4	8	62.0616	314150	9003.28	SCG2
16	B4	9	62.356	312641	8995.42	SCG2
16	B4	10	62.6505	308020	8933.95	SCG2
16	B4	11	62.9449	305501	8846.34	SCG2
16	B4	12	63.2393	302625	8767.86	SCG2
16	B4	13	63.5337	301232	8723.92	SCG2
16	B4	14	63.8281	298079	8718.46	SCG2
16	B4	15	64.1226	295017	8735.35	SCG2
16	B4	16	64.417	292673	8750.01	SCG2
16	B4	17	64.7114	288952	8743.16	SCG2
16	B4	18	65.0058	287055	8709.84	SCG2
16	B4	19	65.3002	283494	8659.75	SCG2
16	B4	20	65.5947	280739	8610.09	SCG2
16	B4	21	65.8891	278484	8575.32	SCG2
16	B4	22	66.1835	275921	8559.17	SCG2
16	B4	23	66.4779	273506	8553.43	SCG2
16	B4	24	66.7723	270360	8544.24	SCG2
16	B4	25	67.0667	267327	8521.84	SCG2
16	B4	26	67.3612	265001	8486.08	SCG2
16	B4	27	67.6556	261854	8444.54	SCG2
16	B4	28	67.95	260123	8405.24	SCG2
16	B4	29	68.2444	257295	8370.09	SCG2
16	B4	30	68.5388	254816	8334.87	SCG2
16	B4	31	68.8333	251630	8294.22	SCG2
16	B4	32	69.1277	248937	8246.42	SCG2
16	B4	33	69.4221	246607	8193.28	SCG2
16	B4	34	69.7165	244621	8135.61	SCG2
16	B4	35	70.0109	241903	8070.4	SCG2
16	B4	36	70.3054	239583	7993.49	SCG2
16	B4	37	70.5998	236059	7906.09	SCG2
16	B4	38	70.8942	233939	7818.49	SCG2
16	B4	39	71.1886	232318	7746.32	SCG2
16	B4	40	71.483	230089	7701.54	SCG2
16	B4	41	71.7774	227630	7685.18	SCG2
16	B4	42	72.0719	225259	7687.15	SCG2
16	B4	43	72.3663	222654	7692.6	SCG2
16	B4	44	72.6607	220326	7689.68	SCG2
16	B4	45	72.9551	217964	7672.46	SCG2
16	B4	46	73.2495	215683	7639.4	SCG2
16	B4	47	73.544	213043	7599.23	SCG2
16	B4	48	73.8384	211102	7558.13	SCG2
16	B4	49	74.1328	208343	7519.79	SCG2
16	B4	50	74.4272	206522	7484.96	SCG2
16	B4	51	74.7216	203813	7452.66	SCG2
16	B4	52	75.016	201331	7420.68	SCG2
16	B4	53	75.3105	199688	7385.56	SCG2
16	B4	54	75.6049	197099	7342.46	SCG2
16	B4	55	75.8993	194782	7286.31	SCG2
16	B4	56	76.1937	192848	7215.17	SCG2
16	B4	57	76.4881	190015	7133.21	SCG2
16	B4	58	76.7826	187768	7050.44	SCG2
16	B4	59	77.077	186615	6978.35	SCG2
16	B4	60	77.3714	184194	6924.26	SCG2
16	B4	61	77.6658	181953	6889.48	SCG2
16	B4	62	77.9602	179295	6873.35	SCG2
16	B4	63	78.2546	177919	6881.55	SCG2
16	B4	64	78.5491	175607	6936.94	SCG2
16	B4	65	78.8435	173527	7093.36	SCG2
16	B4	66	79.1379	171258	7456.64	SCG2
16	B4	67	79.4323	169484	8115.66	SCG2
16	B4	68	79.7267	167223	9294.7	SCG2
16	B4	69	80.0212	164817	11359.3	SCG2
16	B4	70	80.3156	162567	14664.8	SCG2
16	B4	71	80.61	160313	19466.6	SCG2
16	B4	72	80.9044	156283	25726.2	SCG2
16	B4	73	81.1988	149551	32925.8	SCG2
16	B4	74	81.4933	137784	40013.3	SCG2
16	B4	75	81.7877	113636	45581.1	SCG2
16	B4	76	82.0821	74545.1	48280	SCG2
16	B4	77	82.3765	40250.7	47316.9	SCG2
16	B4	78	82.6709	21922.6	42788.6	SCG2
16	B4	79	82.9653	16893	35664.6	SCG2
16	B4	80	83.2598	16367	27419.1	SCG2
16	B4	81	83.5542	16527.7	19506.1	SCG2
16	B4	82	83.8486	15809.6	12937.1	SCG2
16	B4	83	84.143	16063.4	8122.95	SCG2
16	B4	84	84.4374	15013.5	4367.75	SCG2
16	B4	85	84.7319	15734.6	2098.94	SCG2
16	B4	86	85.0263	16027	895.648	SCG2
16	B4	87	85.3207	15213.9	326.458	SCG2
16	B4	88	85.6151	15757	97.0933	SCG2
16	B4	89	85.9095	15301.2	32.1001	SCG2
16	B4	90	86.2039	15365	35.2354	SCG2
16	B4	91	86.4984	15222.9	55.5107	SCG2
16	B4	92	86.7928	14956.9	67.1709	SCG2
16	B4	93	87.0872	14513.7	61.043	SCG2
16	B4	94	87.3816	14812.6	40.6484	SCG2
16	B4	95	87.676	14684.8	17.1841	SCG2
16	B4	96	87.9705	14903.5	1.66357	SCG2
16	B4	97	88.2649	14906	-2.54639	SCG2
16	B4	98	88.5593	14320	-1.98975	SCG2
16	B4	99	88.8537	13778.8	-8.77734	SCG2
16	B4	100	89.1481	14787.2	-33.0332	SCG2
16	B4	101	89.4426	14114.1	-77.27	SCG2
16	B4	102	89.737	14037.4	-135.129	SCG2
16	B4	103	90.0314	13930.4	-193.885	SCG2
16	B4	104	90.3258	14386.2	-239.147	SCG2
16	B4	105	90.6202	14170.1	-260.801	SCG2
16	B4	106	90.9146	14930.6	-258.131	SCG2
16	B4	107	91.2091	13942.6	-240.612	SCG2
16	B4	108	91.5035	13633.9	-222.265	SCG2
16	B4	109	91.7979	14204.7	-212.509	SCG2
16	B4	110	92.0923	14196.8	-210.315	SCG2
16	B4	111	92.3867	13913.6	-206.351	SCG2
16	B4	112	92.6812	14666.1	-191.339	SCG2
16	B4	113	92.9756	13752.6	-163.778	SCG2
16	B4	114	93.27	13675.8	-131.404	SCG2
16	B4	115	93.5644	14184.3	-106.152	SCG2
16	B4	116	93.8588	13582.8	-96.9219	SCG2
16	B4	117	94.1532	13347.8	-104.905	SCG2
16	B4	118	94.4477	13928.7	-123.676	SCG2
16	B4	119	94.7421	13856.9	-143.153	SCG2
17	B5	1	60.0009	315341	7741.31	SCG2
17	B5	2	60.2957	312610	7813.22	SCG2
17	B5	3	60.5905	311083	7878.36	SCG2
17	B5	4	60.8852	308830	7929.95	SCG2
17	B5	5	61.18	306155	7969.6	SCG2
17	B5	6	61.4748	304206	8005.17	SCG2
17	B5	7	61.7696	301327	8044.79	SCG2
17	B5	8	62.0644	299165	8091.82	SCG2
17	B5	9	62.3591	297316	8143.25	SCG2
17	B5	10	62.6539	293789	8191.91	SCG2
17	B5	11	62.9487	290917	8229.7	SCG2
17	B5	12	63.2435	289262	8250.17	SCG2
17	B5	13	63.5383	286237	8250.02	SCG2
17	B5	14	63.833	283533	8230.15	SCG2
17	B5	15	64.1278	280399	8195.25	SCG2
17	B5	16	64.4226	277671	8151.27	SCG2
17	B5	17	64.7174	276060	8101.68	SCG2
17	B5	18	65.0122	273515	8046.51	SCG2
17	B5	19	65.3069	270081	7985.37	SCG2
17	B5	20	65.6017	267430	7922.05	SCG2
17	B5	21	65.8965	264828	7865.54	SCG2
17	B5	22	66.1913	263568	7826.16	SCG2
17	B5	23	66.4861	260439	7810.04	SCG2
17	B5	24	66.7808	257730	7816.32	SCG2
17	B5	25	67.0756	255493	7838.48	SCG2
17	B5	26	67.3704	253253	7868.01	SCG2
17	B5	27	67.6652	251009	7897.19	SCG2
17	B5	28	67.96	247481	7920.24	SCG2
17	B5	29	68.2547	245710	7933.11	SCG2
17	B5	30	68.5495	243150	7932.77	SCG2
17	B5	31	68.8443	240711	7917.43	SCG2
17	B5	32	69.1391	237690	7887.49	SCG2
17	B5	33	69.4339	235475	7846.35	SCG2
17	B5	34	69.7286	232557	7798.72	SCG2
17	B5	35	70.0234	230993	7747.18	SCG2
17	B5	36	70.3182	228702	7689.71	SCG2
17	B5	37	70.613	225481	7621.31	SCG2
17	B5	38	70.9078	223340	7537.04	SCG2
17	B5	39	71.2025	220915	7434.66	SCG2
17	B5	40	71.4973	219035	7343.13	SCG2
17	B5	41	71.7921	216260	7287.07	SCG2
17	B5	42	72.0869	214790	7287.04	SCG2
17	B5	43	72.3817	212367	7350.32	SCG2
17	B5	44	72.6764	210396	7466.36	SCG2
17	B5	45	72.9712	207804	7602.05	SCG2
17	B5	46	73.266	204993	7719.77	SCG2
17	B5	47	73.5608	203096	7805.62	SCG2
17	B5	48	73.8555	199729	7843.88	SCG2
17	B5	49	74.1503	197216	7832.81	SCG2
17	B5	50	74.4451	194859	7782.13	SCG2
17	B5	51	74.7399	192492	7705.86	SCG2
17	B5	52	75.0347	190267	7614.32	SCG2
17	B5	53	75.3294	188245	7503.5	SCG2
17	B5	54	75.6242	185087	7368.85	SCG2
17	B5	55	75.919	182765	7222.42	SCG2
17	B5	56	76.2138	180874	7076.12	SCG2
17	B5	57	76.5086	179235	6948.69	SCG2
17	B5	58	76.8033	176266	6856.87	SCG2
17	B5	59	77.0981	175732	6806.57	SCG2
17	B5	60	77.3929	172291	6790.08	SCG2
17	B5	61	77.6877	170250	6791.08	SCG2
17	B5	62	77.9825	168526	6793.59	SCG2
17	B5	63	78.2772	165980	6791.14	SCG2
17	B5	64	78.572	164253	6795.4	SCG2
17	B5	65	78.8668	161707	6846.81	SCG2
17	B5	66	79.1616	159831	7030.95	SCG2
17	B5	67	79.4564	157604	7500.63	SCG2
17	B5	68	79.7511	156063	8369.31	SCG2
17	B5	69	80.0459	154256	9976.59	SCG2
17	B5	70	80.3407	151621	12671.9	SCG2
17	B5	71	80.6355	148583	16755.1	SCG2
17	B5	72	80.9303	145810	22321.3	SCG2
17	B5	73	81.225	140020	29069.6	SCG2
17	B5	74	81.5198	128920	36180.2	SCG2
17	B5	75	81.8146	108518	42383.1	SCG2
17	B5	76	82.1094	72650.5	46273.3	SCG2
17	B5	77	82.4042	37529.6	46792	SCG2
17	B5	78	82.6989	16748.3	43653.4	SCG2
17	B5	79	82.9937	11689	37488.6	SCG2
17	B5	80	83.2885	11082.7	29614.3	SCG2
17	B5	81	83.5833	10964.5	21545.2	SCG2
17	B5	82	83.8781	11159.4	14502.9	SCG2
17	B5	83	84.1728	11255.5	9136.37	SCG2
17	B5	84	84.4676	11377.6	5200.72	SCG2
17	B5	85	84.7624	10278.7	2692.2	SCG2
17	B5	86	85.0572	11174.8	1345.64	SCG2
17	B5	87	85.352	10297.8	690.486	SCG2
17	B5	88	85.6467	10058.6	393.033	SCG2
17	B5	89	85.9415	10487.6	259.182	SCG2
17	B5	90	86.2363	10526.1	193.632	SCG2
17	B5	91	86.5311	10204.3	154.232	SCG2
17	B5	92	86.8259	9708.19	121.5	SCG2
17	B5	93	87.1206	9914.04	86.0811	SCG2
17	B5	94	87.4154	10118.4	46.8008	SCG2
17	B5	95	87.7102	9891.6	10.0166	SCG2
17	B5	96	88.005	10198.3	-14.4336	SCG2
17	B5	97	88.2998	10218.5	-19.1919	SCG2
17	B5	98	88.5945	9471.12	-3.26123	SCG2
17	B5	99	88.8893	10138.1	28.1533	SCG2
17	B5	100	89.1841	9950.04	66.2046	SCG2
17	B5	101	89.4789	9507.82	100.845	SCG2
17	B5	102	89.7737	9872.58	122.281	SCG2
17	B5	103	90.0684	8981.05	122.442	SCG2
17	B5	104	90.3632	9668.61	97.1421	SCG2
17	B5	105	90.658	9144.79	48.1616	SCG2
17	B5	106	90.9528	9514.25	-16.1279	SCG2
17	B5	107	91.2476	9306.54	-82.2686	SCG2
17	B5	108	91.5423	9284.77	-135.046	SCG2
17	B5	109	91.8371	9823.08	-162.043	SCG2
17	B5	110	92.1319	9930.73	-158.395	SCG2
17	B5	111	92.4267	9347.05	-129.741	SCG2
17	B5	112	92.7215	9198.67	-91.0981	SCG2
17	B5	113	93.0162	9755.71	-61.04	SCG2
17	B5	114	93.311	9125.42	-53.6074	SCG2
17	B5	115	93.6058	8879.28	-72.2759	SCG2
17	B5	116	93.9006	9898.14	-109.35	SCG2
17	B5	117	94.1953	9553.05	-151.042	SCG2
17	B5	118	94.4901	9871.48	-185.052	SCG2
17	B5	119	94.7849	8962.05	-206.093	SCG2
18	B6	1	60.0009	332369	8137.18	SCG2
18	B6	2	60.2957	331080	8208.41	SCG2
18	B6	3	60.5905	328537	8282.02	SCG2
18	B6	4	60.8852	326221	8348.5	SCG2
18	B6	5	61.18	323607	8402.7	SCG2
18	B6	6	61.4748	321417	8444.63	SCG2
18	B6	7	61.7696	318551	8476.92	SCG2
18	B6	8	62.0644	316280	8503.24	SCG2
18	B6	9	62.3591	313066	8527.31	SCG2
18	B6	10	62.6539	310915	8552.68	SCG2
18	B6	11	62.9487	307496	8580.87	SCG2
18	B6	12	63.2435	305270	8608.78	SCG2
18	B6	13	63.5383	302877	8628.18	SCG2
18	B6	14	63.833	300066	8629.62	SCG2
18	B6	15	64.1278	296163	8608.34	SCG2
18	B6	16	64.4226	293791	8568.84	SCG2
18	B6	17	64.7174	291481	8523.59	SCG2
18	B6	18	65.0122	288185	8486.73	SCG2
18	B6	19	65.3069	286379	8467.18	SCG2
18	B6	20	65.6017	282887	8464.94	SCG2
18	B6	21	65.8965	280707	8472.49	SCG2
18	B6	22	66.1913	277858	8479.48	SCG2
18	B6	23	66.4861	274856	8477.38	SCG2
18	B6	24	66.7808	272123	8462.14	SCG2
18	B6	25	67.0756	269628	8433.49	SCG2
18	B6	26	67.3704	266921	8392.88	SCG2
18	B6	27	67.6652	264471	8341.96	SCG2
18	B6	28	67.96	261508	8283.34	SCG2
18	B6	29	68.2547	259075	8222.21	SCG2
18	B6	30	68.5495	255897	8166.52	SCG2
18	B6	31	68.8443	254218	8124.33	SCG2
18	B6	32	69.1391	251485	8099.84	SCG2
18	B6	33	69.4339	249237	8090.63	SCG2
18	B6	34	69.7286	245902	8088.3	SCG2
18	B6	35	70.0234	244037	8081.77	SCG2
18	B6	36	70.3182	241452	8061.44	SCG2
18	B6	37	70.613	238602	8022.88	SCG2
18	B6	38	70.9078	236489	7968.69	SCG2
18	B6	39	71.2025	233292	7891.72	SCG2
18	B6	40	71.4973	231272	7821.21	SCG2
18	B6	41	71.7921	229709	7770.73	SCG2
18	B6	42	72.0869	226492	7746.31	SCG2
18	B6	43	72.3817	224527	7747.81	SCG2
18	B6	44	72.6764	221721	7773.71	SCG2
18	B6	45	72.9712	219119	7825.15	SCG2
18	B6	46	73.266	217373	7904.83	SCG2
18	B6	47	73.5608	214556	8000.84	SCG2
18	B6	48	73.8555	212232	8092.9	SCG2
18	B6	49	74.1503	209589	8172.75	SCG2
18	B6	50	74.4451	206590	8212.92	SCG2
18	B6	51	74.7399	204117	8189.43	SCG2
18	B6	52	75.0347	200678	8091.81	SCG2
18	B6	53	75.3294	198389	7918.62	SCG2
18	B6	54	75.6242	196077	7661.88	SCG2
18	B6	55	75.919	194078	7404.67	SCG2
18	B6	56	76.2138	191711	7193.39	SCG2
18	B6	57	76.5086	190022	7058.94	SCG2
18	B6	58	76.8033	188033	7008.89	SCG2
18	B6	59	77.0981	186031	7028.55	SCG2
18	B6	60	77.3929	182968	7088.88	SCG2
18	B6	61	77.6877	180974	7158.35	SCG2
18	B6	62	77.9825	179249	7214.33	SCG2
18	B6	63	78.2772	176142	7251.74	SCG2
18	B6	64	78.572	173597	7289.53	SCG2
18	B6	65	78.8668	172237	7379.29	SCG2
18	B6	66	79.1616	169924	7619.97	SCG2
18	B6	67	79.4564	167131	8135.25	SCG2
18	B6	68	79.7511	165506	9038.87	SCG2
18	B6	69	80.0459	162974	10706.7	SCG2
18	B6	70	80.3407	160433	13495.4	SCG2
18	B6	71	80.6355	157913	17714.7	SCG2
18	B6	72	80.9303	154608	23449.5	SCG2
18	B6	73	81.225	148027	30358.4	SCG2
18	B6	74	81.5198	135869	37559.9	SCG2
18	B6	75	81.8146	111525	43728.3	SCG2
18	B6	76	82.1094	71541.4	47442.2	SCG2
18	B6	77	82.4042	34325.6	47682	SCG2
18	B6	78	82.6989	14573.9	44244.1	SCG2
18	B6	79	82.9937	9008.69	37845.8	SCG2
18	B6	80	83.2885	8707.12	29854.2	SCG2
18	B6	81	83.5833	8565.73	21780.8	SCG2
18	B6	82	83.8781	8050.47	14802.2	SCG2
18	B6	83	84.1728	8824.61	9511.2	SCG2
18	B6	84	84.4676	7210.66	5381.89	SCG2
18	B6	85	84.7624	8012.16	2625.2	SCG2
18	B6	86	85.0572	8490.3	1117.44	SCG2
18	B6	87	85.352	8017.69	361.122	SCG2
18	B6	88	85.6467	7113.62	4.05078	SCG2
18	B6	89	85.9415	7952.63	-159.304	SCG2
18	B6	90	86.2363	7789.89	-226.803	SCG2
18	B6	91	86.5311	8065.33	-235.736	SCG2
18	B6	92	86.8259	8568.32	-201.837	SCG2
18	B6	93	87.1206	7272.6	-142.754	SCG2
18	B6	94	87.4154	7320.53	-83.8418	SCG2
18	B6	95	87.7102	7715.42	-50.4727	SCG2
18	B6	96	88.005	6716.16	-56.4155	SCG2
18	B6	97	88.2998	7355.17	-97.9429	SCG2
18	B6	98	88.5945	7570.58	-157.662	SCG2
18	B6	99	88.8893	7073.76	-214.8	SCG2
18	B6	100	89.1841	7771.68	-255.013	SCG2
18	B6	101	89.4789	6780.01	-274.358	SCG2
18	B6	102	89.7737	7532.54	-276.95	SCG2
18	B6	103	90.0684	7156.7	-269.866	SCG2
18	B6	104	90.3632	7312.96	-259.419	SCG2
18	B6	105	90.658	7286.33	-250.305	SCG2
18	B6	106	90.9528	6901.02	-246.161	SCG2
18	B6	107	91.2476	7156.08	-249.372	SCG2
18	B6	108	91.5423	7295.32	-259.411	SCG2
18	B6	109	91.8371	6718.82	-270.903	SCG2
18	B6	110	92.1319	7294.94	-273.315	SCG2
18	B6	111	92.4267	7063.89	-253.764	SCG2
18	B6	112	92.7215	7428.99	-202.79	SCG2
18	B6	113	93.0162	7130.07	-120.728	SCG2
18	B6	114	93.311	6985.53	-20.4648	SCG2
18	B6	115	93.6058	6113.48	76.5566	SCG2
18	B6	116	93.9006	6292.23	150.092	SCG2
18	B6	117	94.1953	6390.88	190.935	SCG2
18	B6	118	94.4901	5438.25	204.424	SCG2
18	B6	119	94.7849	6681.89	205.645	SCG2
19	B7	1	60.0007	339267	8339.31	SCG2
19	B7	2	60.2953	337222	8407.87	SCG2
19	B7	3	60.5899	335918	8470.9	SCG2
19	B7	4	60.8845	332779	8531.75	SCG2
19	B7	5	61.1791	330710	8587.18	SCG2
19	B7	6	61.4737	328038	8638.02	SCG2
19	B7	7	61.7683	325344	8687.06	SCG2
19	B7	8	62.0629	323238	8735.69	SCG2
19	B7	9	62.3574	319781	8782.27	SCG2
19	B7	10	62.652	317486	8821.58	SCG2
19	B7	11	62.9466	314444	8846.95	SCG2
19	B7	12	63.2412	311947	8852.99	SCG2
19	B7	13	63.5358	308823	8839.13	SCG2
19	B7	14	63.8304	305797	8811.38	SCG2
19	B7	15	64.125	302703	8780.38	SCG2
19	B7	16	64.4196	300629	8756.51	SCG2
19	B7	17	64.7142	297698	8744.81	SCG2
19	B7	18	65.0088	295438	8742.95	SCG2
19	B7	19	65.3034	291726	8743.7	SCG2
19	B7	20	65.598	289530	8739.15	SCG2
19	B7	21	65.8925	286162	8724.05	SCG2
19	B7	22	66.1871	284105	8696.85	SCG2
19	B7	23	66.4817	280794	8659.53	SCG2
19	B7	24	66.7763	278094	8616.89	SCG2
19	B7	25	67.0709	275655	8575.05	SCG2
19	B7	26	67.3655	272415	8538.92	SCG2
19	B7	27	67.6601	270761	8509.47	SCG2
19	B7	28	67.9547	267558	8483.07	SCG2
19	B7	29	68.2493	265283	8454.43	SCG2
19	B7	30	68.5439	262038	8421.48	SCG2
19	B7	31	68.8385	259132	8388.48	SCG2
19	B7	32	69.1331	257389	8359.3	SCG2
19	B7	33	69.4277	254379	8349.63	SCG2
19	B7	34	69.7223	252695	8364.84	SCG2
19	B7	35	70.0168	248778	8390.75	SCG2
19	B7	36	70.3114	247248	8411.19	SCG2
19	B7	37	70.606	244740	8417.71	SCG2
19	B7	38	70.9006	241068	8405.37	SCG2
19	B7	39	71.1952	238629	8378.83	SCG2
19	B7	40	71.4898	236754	8340	SCG2
19	B7	41	71.7844	233704	8316.55	SCG2
19	B7	42	72.079	231942	8321.8	SCG2
19	B7	43	72.3736	228752	8360.91	SCG2
19	B7	44	72.6682	225811	8417.68	SCG2
19	B7	45	72.9628	224135	8487.33	SCG2
19	B7	46	73.2574	221118	8565.39	SCG2
19	B7	47	73.5519	218270	8640.31	SCG2
19	B7	48	73.8465	215548	8699.14	SCG2
19	B7	49	74.1411	212391	8729.19	SCG2
19	B7	50	74.4357	209546	8719.09	SCG2
19	B7	51	74.7303	207657	8660.06	SCG2
19	B7	52	75.0249	203882	8548.66	SCG2
19	B7	53	75.3195	200851	8390.8	SCG2
19	B7	54	75.6141	198830	8142.63	SCG2
19	B7	55	75.9087	196038	7888.06	SCG2
19	B7	56	76.2033	194590	7670.25	SCG2
19	B7	57	76.4979	192177	7516.99	SCG2
19	B7	58	76.7925	189517	7436.4	SCG2
19	B7	59	77.0871	188000	7416.28	SCG2
19	B7	60	77.3817	185231	7431.59	SCG2
19	B7	61	77.6762	182668	7455.15	SCG2
19	B7	62	77.9708	180653	7468.54	SCG2
19	B7	63	78.2654	177810	7470.27	SCG2
19	B7	64	78.56	175805	7480.41	SCG2
19	B7	65	78.8546	173322	7544.8	SCG2
19	B7	66	79.1492	171820	7744.14	SCG2
19	B7	67	79.4438	168799	8212.6	SCG2
19	B7	68	79.7384	166990	8959.8	SCG2
19	B7	69	80.033	164239	10255	SCG2
19	B7	70	80.3276	162042	12438.3	SCG2
19	B7	71	80.6222	159164	15804.1	SCG2
19	B7	72	80.9168	156114	20508.2	SCG2
19	B7	73	81.2113	150463	26390.8	SCG2
19	B7	74	81.5059	142528	32835.7	SCG2
19	B7	75	81.8005	125366	38778.5	SCG2
19	B7	76	82.0951	94102.3	42938.5	SCG2
19	B7	77	82.3897	53825.9	44232.6	SCG2
19	B7	78	82.6843	25609.1	42196.8	SCG2
19	B7	79	82.9789	15120.6	37196.1	SCG2
19	B7	80	83.2735	13820.1	30297.3	SCG2
19	B7	81	83.5681	13018.7	22867.3	SCG2
19	B7	82	83.8627	12954.4	16109.5	SCG2
19	B7	83	84.1573	12976.8	10754	SCG2
19	B7	84	84.4519	12458.9	6511.23	SCG2
19	B7	85	84.7465	13198.9	3330.28	SCG2
19	B7	86	85.0411	12783.6	1540.48	SCG2
19	B7	87	85.3356	12757.9	628.141	SCG2
19	B7	88	85.6302	12266.9	202.481	SCG2
19	B7	89	85.9248	12081.7	23.0498	SCG2
19	B7	90	86.2194	12914.7	-32.54	SCG2
19	B7	91	86.514	13307.1	-20.4844	SCG2
19	B7	92	86.8086	12313.2	25.9639	SCG2
19	B7	93	87.1032	11654.7	75.7949	SCG2
19	B7	94	87.3978	11589.7	101.104	SCG2
19	B7	95	87.6924	12455.4	87.168	SCG2
19	B7	96	87.987	11532.2	38.0928	SCG2
19	B7	97	88.2816	11536.5	-27.7646	SCG2
19	B7	98	88.5762	12198.2	-88.8301	SCG2
19	B7	99	88.8708	11744.4	-130.55	SCG2
19	B7	100	89.1653	11956.6	-149.976	SCG2
19	B7	101	89.4599	11679.5	-154.065	SCG2
19	B7	102	89.7545	11729.2	-153.851	SCG2
19	B7	103	90.0491	11290	-158.11	SCG2
19	B7	104	90.3437	11952.8	-169.993	SCG2
19	B7	105	90.6383	11717.1	-188.023	SCG2
19	B7	106	90.9329	11461.3	-209.663	SCG2
19	B7	107	91.2275	11858.4	-233.852	SCG2
19	B7	108	91.5221	11226	-260.398	SCG2
19	B7	109	91.8167	11795.1	-287.261	SCG2
19	B7	110	92.1113	11801.8	-308.896	SCG2
19	B7	111	92.4059	11711.9	-317.772	SCG2
19	B7	112	92.7005	11902.6	-308.361	SCG2
19	B7	113	92.995	11852.2	-280.914	SCG2
19	B7	114	93.2896	11745.4	-242.562	SCG2
19	B7	115	93.5842	11818.3	-204.915	SCG2
19	B7	116	93.8788	11334.1	-179.298	SCG2
19	B7	117	94.1734	11671.8	-171.932	SCG2
19	B7	118	94.468	11280.9	-181.566	SCG2
19	B7	119	94.7626	11916.6	-200.876	SCG2
20	B8	1	60.0007	336154	7918.08	SCG2
20	B8	2	60.2953	335092	8032.61	SCG2
20	B8	3	60.5899	331803	8138.28	SCG2
20	B8	4	60.8845	330016	8229.59	SCG2
20	B8	5	61.1791	327177	8310.96	SCG2
20	B8	6	61.4737	325824	8392.92	SCG2
20	B8	7	61.7683	322566	8467.21	SCG2
20	B8	8	62.0629	320202	8541.75	SCG2
20	B8	9	62.3574	317976	8624.89	SCG2
20	B8	10	62.652	314278	8710.29	SCG2
20	B8	11	62.9466	312289	8788.2	SCG2
20	B8	12	63.2412	309677	8847.65	SCG2
20	B8	13	63.5358	306836	8880.41	SCG2
20	B8	14	63.8304	302250	8885.14	SCG2
20	B8	15	64.125	301305	8868.4	SCG2
20	B8	16	64.4196	297290	8841.19	SCG2
20	B8	17	64.7142	294792	8812.27	SCG2
20	B8	18	65.0088	292314	8782.84	SCG2
20	B8	19	65.3034	289690	8746.7	SCG2
20	B8	20	65.598	286436	8695.69	SCG2
20	B8	21	65.8925	283264	8627.76	SCG2
20	B8	22	66.1871	280718	8551.3	SCG2
20	B8	23	66.4817	277919	8483.18	SCG2
20	B8	24	66.7763	275604	8441.19	SCG2
20	B8	25	67.0709	273091	8435.53	SCG2
20	B8	26	67.3655	270985	8464.18	SCG2
20	B8	27	67.6601	267952	8514.52	SCG2
20	B8	28	67.9547	265035	8569.32	SCG2
20	B8	29	68.2493	262616	8614.03	SCG2
20	B8	30	68.5439	259561	8641.38	SCG2
20	B8	31	68.8385	257122	8652.13	SCG2
20	B8	32	69.1331	253564	8652.4	SCG2
20	B8	33	69.4277	251647	8648.6	SCG2
20	B8	34	69.7223	248955	8643.07	SCG2
20	B8	35	70.0168	246361	8632.48	SCG2
20	B8	36	70.3114	243018	8610.48	SCG2
20	B8	37	70.606	240647	8572.29	SCG2
20	B8	38	70.9006	238071	8519.58	SCG2
20	B8	39	71.1952	235208	8461.53	SCG2
20	B8	40	71.4898	232560	8406.7	SCG2
20	B8	41	71.7844	230156	8370.6	SCG2
20	B8	42	72.079	228094	8383.2	SCG2
20	B8	43	72.3736	225391	8441.15	SCG2
20	B8	44	72.6682	222284	8516.62	SCG2
20	B8	45	72.9628	219869	8611.7	SCG2
20	B8	46	73.2574	217710	8712.58	SCG2
20	B8	47	73.5519	214254	8805.31	SCG2
20	B8	48	73.8465	210976	8877.24	SCG2
20	B8	49	74.1411	208439	8917.75	SCG2
[truncated: 4,473 more rows]

## Sheet: Dissolution curve results
Instrument Name	2765220071247
Instrument Mode	QuantStudio™ 5 System
Serial Number	2765220071247
Signal Smoothing	true
Creation Date	2024-08-05 17:29:48 afternoon CST
Heating Module Type	96-Well 0.2-mL Block
Reference Fluorescence
Analysis at a specific stage/cycle	stage2, step2
Experiment Name	2024-08-05
Experiment File Name	D:\ZZH\2024-08-05.eds
Experiment Barcode
Experiment Annotation
Experiment Type	Quantitative-Comparison
Experiment End Time	2024-08-05 17:25:26 afternoon CST
Calibration Background Expired	No
Calibration Background Perform	09-28-2022
Calibration Pure Dye ABY Expired	No
Calibration Pure Dye ABY Perform	09-28-2022
Calibration Pure Dye CY5 Expired	No
Calibration Pure Dye CY5 Perform	09-28-2022
Calibration Pure Dye FAM Expired	No
Calibration Pure Dye FAM Perform	09-28-2022
Calibration Pure Dye JUN Expired	No
Calibration Pure Dye JUN Perform	09-28-2022
Calibration Pure Dye MUSTANG PURPLE Expired	No
Calibration Pure Dye MUSTANG PURPLE Perform	09-28-2022
Calibration Pure Dye NED Expired	No
Calibration Pure Dye NED Perform	09-28-2022
Calibration Pure Dye ROX Expired	No
Calibration Pure Dye ROX Perform	09-28-2022
Calibration Pure Dye SYBR Expired	No
Calibration Pure Dye SYBR Perform	09-28-2022
Calibration Pure Dye TAMRA Expired	No
Calibration Pure Dye TAMRA 执行	09-28-2022
Calibration Pure Dye VIC Expired	No
Calibration Pure Dye VIC Perform	09-28-2022
Calibration ROI Expired	No
Calibration ROI Perform	09-28-2022
Calibration Uniformity Expired	No
Calibration Uniformity Perform	09-28-2022
Melt Curve Stage	Stage3
Username
Reagent	SYBR_GREEN
Post-read Stage/Step
Quantification Cycle Method	Ct
Pre-read Stage/Step Number
Reaction Well	Reaction Well Position	Sample	Gene Name	Tm	Dissolution peak height
1	A1	SV-1	SCG2	82.2554	40876.6
2	A2	SV-2	SCG2	82.4028	33084
3	A3	SV-3	SCG2	82.2293	27022.5
3	A3	SV-3	SCG2	74.8688	12095.2
4	A4	T24-1	SCG2	82.0821	41541.4
5	A5	T24-2	SCG2	82.4042	39992.1
6	A6	T24-3	SCG2	82.4042	46785.1
7	A7	SW1710-1	SCG2	82.3897	44214
8	A8	SW1710-2	SCG2	82.3897	31544.6
8	A8	SW1710-2	SCG2	75.0249	11539.5
9	A9	SW1710-3	SCG2	82.4085	44720.1
13	B1	SV-1	SCG2	82.2554	33568.6
14	B2	SV-2	SCG2	82.4028	37883.9
15	B3	SV-3	SCG2	82.2293	43109.6
16	B4	T24-1	SCG2	82.0821	48280
17	B5	T24-2	SCG2	82.2568	46993.6
18	B6	T24-3	SCG2	82.2568	48031.4
19	B7	SW1710-1	SCG2	82.3897	44232.6
20	B8	SW1710-2	SCG2	82.2424	42175.4
21	B9	SW1710-3	SCG2	82.4085	48875.4
25	C1	SV-1	SCG2	82.108	29720.5
25	C1	SV-1	SCG2	74.8862	10990.3
26	C2	SV-2	SCG2	82.4028	40173.1
27	C3	SV-3	SCG2	82.2293	39484.6
28	C4	T24-1	SCG2	82.2293	44345
29	C5	T24-2	SCG2	82.2568	43356.4
30	C6	T24-3	SCG2	82.2568	46956.2
31	C7	SW1710-1	SCG2	82.2424	34200.7
31	C7	SW1710-1	SCG2	74.8776	12445.6
32	C8	SW1710-2	SCG2	82.0951	43067.6
33	C9	SW1710-3	SCG2	82.2611	52457.8
37	D1	SV-1	ACTIN	85.6452	40818.2
38	D2	SV-2	ACTIN	85.7926	35851.3
39	D3	SV-3	ACTIN	85.9095	42086.4
40	D4	T24-1	ACTIN	86.0567	37538.1
41	D5	T24-2	ACTIN	85.7941	43296.8
42	D6	T24-3	ACTIN	85.7941	44624
43	D7	SW1710-1	ACTIN	85.6302	47971
44	D8	SW1710-2	ACTIN	85.6302	48866.5
45	D9	SW1710-3	ACTIN	85.7991	50013
49	E1	SV-1	ACTIN	85.4978	39182.7
50	E2	SV-2	ACTIN	85.6452	39542.2
51	E3	SV-3	ACTIN	86.0567	39527
52	E4	T24-1	ACTIN	86.2039	38179.2
53	E5	T24-2	ACTIN	85.7941	43698.3
54	E6	T24-3	ACTIN	85.7941	47652.6
55	E7	SW1710-1	ACTIN	85.6302	44727.9
56	E8	SW1710-2	ACTIN	85.6302	43132.6
57	E9	SW1710-3	ACTIN	85.7991	54350.6
61	F1	SV-1	ACTIN	85.4978	30840.1
62	F2	SV-2	ACTIN	85.4978	32906.3
63	F3	SV-3	ACTIN	86.3512	37986.7
64	F4	T24-1	ACTIN	86.4984	34221.5
65	F5	T24-2	ACTIN	85.9415	46722.6
66	F6	T24-3	ACTIN	85.9415	40423.8
67	F7	SW1710-1	ACTIN	85.4829	43651.1
68	F8	SW1710-2	ACTIN	85.6302	39578.7
69	F9	SW1710-3	ACTIN	85.7991	50016.1
