# Supplementary material for: Construction and verification of a prognostic model for bladder cancer based on disulfidptosis-related angiogenesis genes
Source: PeerJ. 2025 Feb 21;13:e18911. doi: 10.7717/peerj.18911 (PMC11849515; doi:10.7717/peerj.18911)
Supplement: Supplemental Information 7 [file peerj-13-18911-s007.xls]

## Sheet: Sheet1
ITEM TO CHECK	IMPORTANCE	CHECKLIST
EXPERIMENTAL DESIGN
Definition of experimental and control groups	E	9/177-178
Number within each group	E	9/177-178
Assay carried out by core lab or investigator's lab?	D	no
Acknowledgement of authors' contributions	D	no
SAMPLE
Description	E	9/179-181
Volume/mass of sample processed	D	no
Microdissection or macrodissection	E	9/179-181
Processing procedure	E	9/179-181
If frozen - how and how quickly?	E	9/179-181
If fixed - with what, how quickly?	E	9/179-181
Sample storage conditions and duration (especially for FFPE samples)	E	9/179-181
NUCLEIC ACID EXTRACTION
Procedure and/or instrumentation	E	9/182-183
Name of kit and details of any modifications	E	9/182
Source of additional reagents used	D	no
Details of DNase or RNAse treatment	E	9/181-183
Contamination assessment (DNA or RNA)	E	9/181-183
Nucleic acid quantification	E	9/181-183
Instrument and method	E	9/181-183
Purity (A260/A280)	D	no
Yield	D	no
RNA integrity method/instrument	E	9/181-183
RIN/RQI or Cq of 3' and 5' transcripts	E	9/181-183
Electrophoresis traces	D	no
Inhibition testing (Cq dilutions, spike or other)	E	9/181-183
REVERSE TRANSCRIPTION
Complete reaction conditions	E	9/182-183
Amount of RNA and reaction volume	E	9/182-183
Priming oligonucleotide (if using GSP) and concentration	E	9/182-183
Reverse transcriptase and concentration	E	9/182-183
Temperature and time	E	9/182-183
Manufacturer of reagents and catalogue numbers	D	no
Cqs with and without RT	D*	no
Storage conditions of cDNA	D	no
qPCR TARGET INFORMATION
If multiplex, efficiency and LOD of each assay.	E	9/183-184
Sequence accession number	E	9/183-184
Location of amplicon	D	no
Amplicon length	E	9/183-184
In silico specificity screen (BLAST, etc)	E	9/183-184
Pseudogenes, retropseudogenes or other homologs?	D	no
Sequence alignment	D	no
Secondary structure analysis of amplicon	D	no
Location of each primer by exon or intron (if applicable)	E	9/183-184
What splice variants are targeted?	E	9/183-184
qPCR OLIGONUCLEOTIDES
Primer sequences	E	10/188-193
RTPrimerDB Identification Number	D	no
Probe sequences	D**	no
Location and identity of any modifications	E	10/188-193
Manufacturer of oligonucleotides	D	no
Purification method	D	no
qPCR PROTOCOL
Complete reaction conditions	E	9/184-186
Reaction volume and amount of cDNA/DNA	E	9/184-186
Primer, (probe), Mg++ and dNTP concentrations	E	9/184-186
Polymerase identity and concentration	E	9/184-186
Buffer/kit identity and manufacturer	E	9/184-186
Exact chemical constitution of the buffer	D	no
Additives (SYBR Green I, DMSO, etc.)	E	9/184-186
Manufacturer of plates/tubes and catalog number	D	no
Complete thermocycling parameters	E	9/184-186
Reaction setup (manual/robotic)	D	no
Manufacturer of qPCR instrument	E	9/184-186
qPCR VALIDATION
Evidence of optimisation (from gradients)	D	no
Specificity (gel, sequence, melt, or digest)	E	9/183-186
For SYBR Green I, Cq of the NTC	E	9/183-186
Standard curves with slope and y-intercept	E	9/183-186
PCR efficiency calculated from slope	E	9/183-186
Confidence interval for PCR efficiency or standard error	D	no
r2 of standard curve	E	9/183-186
Linear dynamic range	E	9/183-186
Cq variation at lower limit	E	9/183-186
Confidence intervals throughout range	D	no
Evidence for limit of detection	E	9/183-186
If multiplex, efficiency and LOD of each assay.	E	9/183-186
DATA ANALYSIS
qPCR analysis program (source, version)	E	9/183-187
Cq method determination	E	9/183-187
Outlier identification and disposition	E	9/183-187
Results of NTCs	E	9/183-187
Justification of number and choice of reference genes	E	9/183-187
Description of normalisation method	E	9/183-187
Number and concordance of biological replicates	D	no
Number and stage (RT or qPCR) of technical replicates	E	9/183-187
Repeatability (intra-assay variation)	E	9/183-187
Reproducibility (inter-assay variation, %CV)	D	no
Power analysis	D	no
Statistical methods for result significance	E	10/196
Software (source, version)	E	9/183-187
Cq or raw data submission using RDML	D	no
Table 1. MIQE checklist for authors, reviewers and editors. All essential information (E) must be submitted with the manuscript. Desirable
information (D) should be submitted if available. If using primers obtained from RTPrimerDB, information on qPCR target, oligonucleotides,
protocols and validation is available from that source.
*: Assessing the absence of DNA using a no RT assay is essential when first extracting RNA. Once the sample has been validated as
RDNA-free, inclusion of a no-RT control is desirable, but no longer essential.
**: Disclosure of the probe sequence is highly desirable and strongly encouraged. However, since not all commercial pre-designed assay
vendors provide this information, it cannot be an essential requirement. Use of such assays is advised against.
